# Supplementary material for: Biodiversity between sand grains: Meiofauna composition across southern and western Sweden assessed by metabarcoding
Source: Biodivers Data J. 2020 Apr 27;8:e51813. doi: 10.3897/BDJ.8.e51813 (PMC7198628; doi:10.3897/BDJ.8.e51813)
Supplement: Supplementary material 5 — Supplemental Data 5 [file bdj-08-e51813-s005.fasta]

>Acoela_Acoela_indet_IDUJ13_426_COI
AACTCTGTATTTCATTTTTGGGATTATTGGGGGTGTAGTAGGTGCTGTTATAAGACTTTT
AATTCGATCTGAGCTACGAAATCCTGGAGG------GAATCTTATTAATGAAAATGCTTA
TAATGTGATTATCACTGCTCATGGTCTTATCATAATTTTTTTTTTTGTAATGCCTGTTTT
AATGGGAGGATTTGGAAATTGACTGCTTCCTCCAATATTGGGCTGTGGCGATATAGCTTT
TCCCCGACTAAATAATTTAGCCTTTTGGTTTATACCTCCTAGATTTAGATTGCTTATCCT
TAGAAGATTGTCTGAGATCGGGGTTGGAAGGGGTTGAACTATTTACCCCCCTATAAGATC
TCTTATTGGTCAACCTGGTTTAAGGGTTGATTTAGCTATCTTTAGACTTCATATTGCCGG
AGCTTCCAGTATTGGAAGATCCATTAATTTTCTATGCACTATTATTAATCTACGTAACAC
AAGAATCTCTTGAGAAAT--ATTACCTCTTTTTATTTGAACTGTTTTTTTTACTGCTATT
TTACTGGTTTTTTCGCTCCCGGTTTTTGCAGGAGGTATTACAATATTGTTAACGGATCGA
AATTTCAATACTTCTTTTTT----------------------------------------
----------------
>Acoela_Actinoposthia_haplovata_IDAWHel_30_GBFR837838
-AGTCTTTACTTCCTCTTCGGAGGGGGCTCGGGACTTTTAGGTACAATTATAAGATTGGC
CATCCGAAGAGAATTAAAAAGAAGGGGAGG------GGGTCTCCTTTCGGAGAGAACCTA
CAATGTTTTAATTACCGCTCACGGGCTTATCATAATTTTCTTTTTCGTAATGCCTGTTCT
TATAGGAGGTTTTAGAAATTGACTTCTCCCTCCCATGTTAGGATGTGCCGATATGGCCTT
TCCTCGATTGAATAATTTTTCCTTTTGACTTCTCCCTCCCAGCCTTTCTTTTCTTATCCT
GAGAAGGTTGGTGGAAGCAGGTGTGGGATCCGGTTGAACAATTTATCCACCAATAAGAAG
ATTAATAGGTCAGCCTGGTGGAAGAGTAGATTTAGCTATTTTTAGATTACATGTAGCCGG
AGCTTCCTCCATTGGAAGTTCAATTAATTTCCTTTGTACAATTATTAACTTACGAGCTTC
TCTCATTAGATGAGAAAT--AATTCCTCTTTTCGTTTGAACTGTTTTTTTCACTGCAATC
TTGTTAGTTCTTTCTCTTCCTGTATTTGCTGGGGGAATTACAATGTTACTCACAGATCGA
AATTTAAATACTTCTTTTTTTGATCCATCAGGAGGGGGGGATCCTGTTTTATTTGTACAT
TTATTT----------
>Acoela_Childia_sp17_IDUJ13_128_COI
-----------------------------CTGGGCTCTTGGGAACCATTATGAGACTAGC
AATTCGAAGAGAACTTAAAAGGGGGGGAAT------AAGCTTATTATCAGAAAGCACCTA
TAATGTTCTGATTACTGCACATGGTCTCATTATAATTTTTTTTTTTGTTATGCCTGTTCT
TATGGGGGGGTTTAAAAATTGACTTCTACCTCCCATATTAGGATGTGCTGATATGGCCTT
CCCACGATTGAACAATTTATCCTTTTGACTCCTCCCCCCAAGCCTTTCCCTCCTAATTTT
GAGGAGACTTGTTGAGTCTGGGGTTGGATCCGGATGAACAATTTATCCCCCCATGAGGGG
ACTTATGGGACAACCTGGTGGAAGAGTTGATTTGGCAATTTTTAGCCTCCACGTAGCAGG
AGCCTCTTCCATTGGAAGTTCTATTAATTTCCTATGTACAATTATTAACTTACGGTCTTC
TTTAATTAGTTGGGAGCT--CATCCCTCTTTTTGTTTGAACCGTTTTTTTTACTGCCATC
CTTTTAGTACTCTCTCTTCCTGTTTTTGCAGGAGGAATTACTATACTTCTAACAGATCGT
AATTTAAACACTTCTTTTTTTGATCCTTCTGGGGGGGGAGATCCGGTTCTTTTCGTCCTT
TAATTT----------
>Acoela_Childia_sp19_IDUJ13_425_COI
TAGACTTTATTTTATTTTTGGAGTAAGTTCAGGTTTGCTTGGTACCCTTATAAGTGTGGC
CATCCGAAGAGAGTTAAAAAGAAGGAGAAT------TAGTTTATTATCAGAAAACAGGTA
TAATGTCTTAATTACAGCCCATGGTCTTATTATAATTTTCTTCTTTGTCATGCCTGTTTT
AATAGGAGGATTTAGGAACTGGCTTTTGCCTCCTATATTAGGTTGTGCAGATATGGCCTT
TCCACGACTTAATAATTTTTCTTTTTGGCTTTTGCCTCCTAGACTCTCCTTTCTTCTATT
AAGAAGTTTAATTGAATCTGGTGTCGGGTCAGGTTGGACTATTTATCCCCCAATAAGAAG
CCTAATTGGACAGCCTGGTAGAAGAGTTGACTTAGCGATTTTTAGATTACATATTGCAGG
TGCTTCTTCTATTGGGAGTTCTATTAATTTTCTGTGTACAATTATCAATCTCCGATCTCC
TTTGTTAAGATGAGAAGG--AATTCCATTATTTATTTGAACTGTTTTTTTTACTGCTATT
CTTTTGGTTCTGTCTCTTCCTGTTTTTGCAGGAGGTATTACAATACTTCTTACGGATCGA
AATTTAAATACTTCTTTTTTTGACCCTTCTGGGGGGGGGGATCCTGTCTTATTTGTTCAC
TTATTT----------
>Acoela_Childia_sp3_IDUJ09_64_COI
TAGCCTCTATTTTATTTTTGGGGTAAGCTCGGGTTTGCTTGGCACTCTGATAAGCGTGGC
CATCCGAAGGGAGTTAAAAAGAAGAAGAAT------TAGCCTCTTATCGGAAAACAGGTA
TAATGTTTTAATTACTGCACATGGTCTTATTATAATTTTCTTTTTTGTCATGCCTGTTTT
AATGGGGGGATTTAGGAATTGGCTTTTACCTCCTATATTAGGTTGTGCCGATATGGCCTT
CCCACGACTTAATAATTTTTCTTTTTGGCTTTTACCTCCTAGACTTTCCTTTCTCCTATT
AAGAAGTTTAATTGAGTCTGGTGTTGGATCTGGTTGAACTATTTATCCCCCCATAAGAAG
CCTTATTGGGCAGCCCGGAAGAAGAGTTGATTTGGCGATTTTCAGATTACATATTGCGGG
GGCTTCTTCTATTGGAAGTTCAATTAATTTCCTATGTACAATTATTAATCTCCGATCTCC
TTTATTGAGATGAGAGGG--TATCCCTTTATTTATTTGAACTGTTTTTTTTACTGCCATT
CTTTTAGTTCTTTCTCTTCCTGTTTTTGCAGGGGGTATTACCATACTTCTAACAGATCGA
AACTTAAATACTTCTTTTTTCGACCCTTC-GGGGGGGGGGATCCTGTTTTATTTGTTCAC
TTATTT----------
>Acoela_Eumecynostomum_flavescens_IDUJ13_276_2_COI
AACTTTATATATGGTTTTTGGAGCCCTTGCTGGGATCCTCGGAACAATTATAAGGGTTTT
GATTCGTTCGGAGTTGCGATCTAGGGGCCC------GGGAGTGGTGAGGGAGGCTACTTA
TAATGTTTTAATTACCGCCCACGGCCTTATTATAATCTTTTTTTTCGTTATGCCCGTCCT
TATGGGAGGGTTCAGAAATTGACTTCTCCCCCTCATACTGGGTTGTGTAGACATGGCGTT
TCCACGCTTAAATAATCTTTCTTTTTGACTTCTCCCCCCAAGATTGACTCTTCTCCTCCT
AAGGAGGCTATCCGAGGTAGGAGTGGGGAGGGGGTGGACAATTTACCCCCCCATAAGTGG
GTTAATTGGTCAGCCTGGGTTAAGAGTGGATTTAGCAATCTTTAGCTTACACATTGCGGG
AGCCTCCTCCATTGGAAGTTCAATTAACTTCCTTTGCACAATTAGGAATCTACGACTCCC
CCACATAACCTGAGAGCA--CATCCCTCTTTTTGTGTGAACTGTTTTCTTCACCGCTATC
CTACTTGTTCTCTCCCTTCCCGTATTTGCAGGGGGGATCACAATGCTTCTAACCGATCGT
AATTTTAACACCACTTTTTTCGATCCGGCCGGGGGGGGGGACCCCGTTCTCTTTGTTCAC
----------------
>Acoela_Eumecynostomum_flavescens_IDUJ13_276_COI
AACTTTATATATGGTTTTTGGAGCCCTTGCTGGGATCCTCGGAACAATTATAAGGGTTTT
GATTCGTTCGGAGTTGCGATCTAGGGGCCC------GGGAGTGGTGAGGGAGGCTACTTA
TAATGTTTTAATTACCGCCCACGGCCTTATTATAATCTTTTTTTTCGTTATGCCCGTCCT
TATGGGAGGGTTCAGAAATTGACTTCTCCCCCTCATACTGGGTTGTGTAGACATGGCGTT
TCCACGCTTAAATAATCTTTCTTTTTGACTTCTCCCCCCAAGATTGACTCTTCTCCTCCT
AAGGAGGCTATCCGAGGTAGGAGTGGGGAGGGGGTGGACAATTTACCCCCCCATAAGTGG
GTTAATTGGTCAGCCTGGGTTAAGAGTGGATTTAGCAATCTTTAGCTTACACATTGCGGG
AGCCTCCTCCATTGGAAGTTCAATTAACTTCCTTTGCACAATTAGGAATCTACGACTCCC
CCACATAACCTGAGAGCA--CATCCCTCTTTTTGTGTGAACTGTTTTCTTCACCGCTATC
CTACTTGTTCTCTCCCTTCCCGTATTTGCAGGGGGGATCACAATGCTTCTAACCGATCGT
AATTTTAACACCACTTTTTTCGATCCGGCCGGGGGGGGGGACCCCGTTCTCTTTGTTCA-
----------------
>Acoela_Eumecynostomum_westbladi_IDUJ11_392_COI
AACTTTATATATGGTTTTTGGAGCCCTTGCTGGGATCCTCGGAACAATTATAAGGGTTTT
GATTCGTTCGGAGTTGCGATCTAGGGGCCC------GGGAGTGGTGAGGGAGGCTACTTA
TAATGTCTTAATTACCGCCCACGGCCTTATTATAATCTTTTTTTTCGTTATGCCCGTCCT
TATGGGGGGGTTCAGAAATTGACTTCTCCCCCTCATACTGGGTTGTGTAGACATGGCGTT
TCCACGCTTAAATAATCTTTCTTTTTGACTTCTCCCCCCAAGATTAACTCTTCTCCTCCT
AAGGAGGCTATCCGAGGTAGGAGTGGGGAGGGGGTGGACAATTTACCCCCCCATAAGTGG
GTTAATTGGTCAGCCTGGGTTAAGAGTGGATTTAGCAATCTTTAGCTTACACATTGCGGG
AGCCTCCTCCATTGGAAGTTCAATTAACTTCCTTTGCACAATTAGGAATCTACGACTCCC
CCACATAACCTGAGAGCA--CATCCCTCTTTTTGTGTGAACTGTTTTCTTCACCGCTATC
CTACTTGTTCTCTCCCTTCCCGTATTTGCAGGGGGGATCACAATGCTTCTAACCGATCGT
AATTTTAACACCACTTTTTTCGACCCGGCCGGAGGGGGGGACCCCGTTCTCTTTGTTCAC
CTTTTC----------
>Acoela_Postmecynostomum_pictum_IDUJ11_252_COI
AACTTTATATATGGTTTTTGGAGCCCTTGCTGGGATCCTCGGAACAATTATAAGGGTTTT
GATTCGTTCGGAGTTGCGATCTAGGGGCCC------GGGAGTGGTGAGGGAGGCTACTTA
TAATGTTTTAATTACCGCCCACGGCCTTATTATAATCTTTTTTTTCGTTATGCCCGTCCT
TATGGGGGGGTTCAGAAATTGACTTCTCCCCCTCATACTGGGTTGTGTAGACATGGCGTT
TCCACGCTTAAATAATCTTTCTTTTTGACTTCTCCCCCCAAGATTGACTCTTCTCCTCCT
AAGGAGGCTATCCGAGGTAGGAGTGGGGAGGGGGTGGACAATTTACCCCCCCATAAGTGG
GTTAATTGGTCAGCCTGGGTTAAGAGTGGATTTAGCAATCTTTAGCTTACACATTGCGGG
AGCCTCCTCCATTGGAAGTTCAATTAACTTCCTTTGCACAATTAGGAATCTACGACTCCC
CCACATAACCTGAGAGCA--CATCCCTCTTTTTGTGTGAACTGTTTTCTTCACCGCTATC
CTACTTGTTCTCTCCCTTCCCGTATTTGCAGGGGGGATCACAATGCTTCTAACCGATCGT
AATTTTAACACCACTTTTTTCGATCCGGCCGGGGGGGGGGACCCCGTTCTCTTTGTTCAC
CTTTTC----------
>Acoela_Mecynostomum_haplovarium_IDUJ13_340_COI
------------------------------------------------------------
----------------------------------------------------------TA
TAATGTTTTAATTACCGCCCACGGCCTTATTATAATCTTTTTTTTCGTTATGCCCGTCCT
TATGGGGGGGTTCAGAAATTGACTTCTCCCCCTCATACTGGGTTGTGTAGACATGGCGTT
TCCACGCTTAAATAATCTTTCTTTTTGACTTCTCCCCCCAAGATTGACTCTTCTCCTCCT
AAGGAGGCTATCCGAGGTAGGAGTGGGGAGGGGGTGGACAATTTACCCCCCCATAAGTGG
GTTAATTGGTCAGCCTGGGTTAAGAGTGGATTTAGCAATCTTTAGCTTACACATTGCGGG
AGCCTCCTCCATTGGAAGTTCAATTAACTTCCTTTGCACAATTAGGAATCTACGACTCCC
CCACATAACCTGAGAGCA--CATCCCTCTTTTTGTGTGAACTGTTTTCTTCACCGCTATC
CTACTTGTTCTCTCCCTTCCCGTATTTGCAGGGGGGATCACAATGCTTCTAACCGATCGT
AATTTTAACACCACTTTTTTCGATCCGGCCGGGGGGGGGGACCCCGTTCTCTTTGTTCAC
CTTTT-----------
>Acoela_Paramecynostomum_diversicolor_IDUJ11_242_COI
AACTTTATACTTTATTTTTGGAACCCTCTCTGGGATTTTGGGGTCCCTGCTAAGAGTTCT
CATCCGCTCTGAGCTTCGTGTAAGCGGGGG------TGGGATCCTGAGGGAAAACACCTA
TAATGTTGTGATTACCGCCCATGGCCTCATCATAATCTTTTTTTTTGTGATGCCCATCTT
AATGGGGGGGTTCAGAAACTGACTTCTTCCCCTTATGCTCGGATGTGTAGACATGGCTTT
CCCTCGCCTAAATAATCTTTCTTTCTGACTTCTCCCCCCCAGGCTAAGACTGCTCCTTCT
GAGGGGCTTGAGGGAGGTTGGAGTGGGTGGGGGATGAACCCTCTACCCCCCCATAAGGAG
AATTGTCGGGCAGCCTGGGTCAAGGGTAGACATGGCTATTTTTAGGCTTCACGTTGCTGG
AGCTTCCTCTATTGGGAGATCTATTAACTTTCTGTGTACGATTTCCAACCTTCGTATCCC
AGGGATGACATGGGAGCA--TATCCCCCTCTTTGTTTGGACTGTTTTCTTTACTGCTATT
CTTTTAGTTCTTTCCCTCCCCGTTTTTGCAGGGGGGATCACAATGCTCCTTACAGACCGA
AATTTCAATACATCCTTTTTCGACCCCTCAGGAGGAGGGGACCCAGTTCTCTTTGTTCAC
CTTTTT----------
>Acoela_Paramecynostomum_diversicolor_IDUJ13_264_COI
------------------------CCTCTCTGGGATTTTGGGGTCCCTGCTAAGAGTTCT
CATCCGCTCTGAGCTTCGTGTAAGCGGGGG------TGGGATCCTGAGGGAAAACACCTA
TAATGTTGTGATTACCGCCCATGGCCTCATCATAATCTTTTTTTTTGTGATGCCCATCTT
AATGGGGGGGTTCAGAAACTGACTTCTTCCCCTTATGCTCGGATGTGTAGACATGGCTTT
CCCTCGCCTAAATAATCTTTCTTTCTGACTTCTTCCCCCCAGGCTAAGACTGCTCCTTCT
GAGGGGCTTGAGGGAGGTTGGAGTGGGTGGGGGATGAACCCTCTACCCCCCCATAAGGAG
AATTGTCGGGCAGCCTGGGTCAAGGGTAGACATGGCTATTTTTAGGCTTCACGTTGCTGG
AGCTTCCTCTATTGGGAGATCTATTAACTTTCTGTGTACGATTTCCAACCTTCGTATCCC
AGGGATGACATGGGAGCA--TATCCCCCTCTTTGTTTGGACTGTTCTCTTTACTGCTATT
CTTTTAGTTCTTTCCCTCCCCGTTTTTGCAGGGGGGATCACAATGCTCCTTACAGACCGA
AATTTCAATACATCCTTTTTCGACCCCTCAGGAGGAGGGGACCCAGTTCTCTTTGTTCAC
CTTTTT----------
>Acoela_Eumecynostomum_sp4_IDUJ13_445_COI
AACCTTGTATTTCTTATTTGGTGTTTTTTCTGGAGTTTTAGGGGCCTTCATAAGATTATT
AATTCGTTCAGAGCTACGAACTCCAGGTGG------GAGAATATTAAGTGAAACTGCGTA
CAATATTTTAATTACGGCACATGGGTTGATTATAATCTTTTTTTTTGTTATACCTGTTCT
AATAGGGGGGTTTGGAAATTTACTTTTACCTCCTATACTTGGTTGTGGGGACATAGCTTT
CCCACGTCTTAATAATTTAGCTTTTTGATTTCTCCCCCCAAGATTCATACTGTTGATTCT
TAGAAGTTTGTCAGAAATAGGAGTAGTGAGAGGATGGACAATTTATCCACCAATGAGAAG
ATTGATTGGGCAACCTGGAATAAGAGTAGATTTAGCAATTTTCAGTTTGCACATTGCTGG
TGCTTCTTCTATTGGAAGATCCATTAATTTTCTTTGCACTATTATTAATTTACGAAATAG
AAGAATTTCATGAGAAAA--TTTGACTTTATTCGTCTGAACTGTTTTCTTTACTTCCATT
TTATTGGTTTTCTCACTTCCAGTGTTTGCTGGGGGAATTACAATACTTTTAACTGATCGA
AATTTTAATACTTCATTTTTTGATCCTGCTGGAGGTGGAGACCCAGTATTATTTGTTCAT
TTATTT----------
>Acoela_Postmecynostomum_glandulosum_IDUJ14_017_COI
GACTCTTTATTTTATCTTTGGTATTTTTTCTGGGGTTTTAGGAGCCTTCATGAGATTAAT
GATTCGTTCGGAGTTGCGAACTCCTGGAGG------AAGCATAATAAGAGAAGGCTCCTA
CAATATTCTAATTACCGCTCACGGCCTTATCATAATTTTTTTTTTTGTAATACCTGTTCT
TATGGGGGGGTTTGGAAATCTCCTTTTACCCCCAATGCTGGGATGTGGAGATATAGCATT
TCCTCGTCTTAACAATTTATCATTCTGATTCCTCCCCCCAAGTATAGGTTTGTTGATTTT
GA-AAGTCTTTCTGAGACAGGGGTTGTTAGCGGGTGGACTATCTACCCTCCAATAAGTAA
-TTGATTGGGCAACCAGGAATAAAG--TAATTTAGCTATTTTTAGATTACACATTGCTGG
GGCGTCTTCTATTGGGAGATCTATTAATTTTTTGTGTACCATCATTAATTTACGTAATAT
TAGAATTTCATGAGAAAT--AATCCCCCTATTTATTTGAACTGTTTTTTTTACCTCTATT
CTTCTGGTTTTTTCACTTCCTGTTTTTGCTGGTGGAATTACAATACTTCTCACAGATCGA
AATTTCAACACATCGTTTTTTGATCCTTCGGGGGGAGGAGATCCGGTTCTTTTCGTTCAT
TTATTT----------
>Acoela_Proconvoluta_primitiva_IDUJ11_020_COI
GACTCTTTATTTTATCTTTGGTATTTTTTCTGGAGTTTTAGGAGCCTTCATGAGATTAAT
GATTCGTTCGGAGTTGCGAACTCCTGGAGG------AAGCATAATAAGAGAAGGCTCCTA
CAATATTCTAATTACCGCTCACGGCCTTATCATAATTTTTTTTTTTGTAATACCTGTTCT
TTTGGGGGGGTTTGGAAATCTCCTTTTACCCCCAATGCTGGGATGTGGAGATATAGCATT
TCCTCGTCTTAACAATTTATCATTCTGATTCCTACCACCAAGTATAGGTTTGTTGATTTT
GAGAAGTCTTTCTGAGACAGGGGTTGTTAGCGGGTGGACTATCTACCCTCCAATAAGTAG
ATTGATTGGGCAACCAGGAATAAGAGTAGATTTAGCTATTTTTAGATTACACATTGCTGG
GGCGTCTTCTATTGGGAGATCTATTAATTTTTTGTGTACCATCATTAATTTACGTAATAT
TAGAATTTCATGAGAAAT--AATCCCACTATTTATTTGAACTGTTTTTTTTACCTCTATT
CTTCTGGTTTTTTCACTTCCTGTTTTTGCTGGTGGAATTACAATACTTCTCACAGATCGA
AATTTCAACACATCGTTTTTTGATCCTTCGGGGGGAGGAGATCCGGTCCTTTTCGTTCAT
TTATTT----------
>Acoela_Proconvoluta_primitiva_IDUJ11_021_COI
GACTCTTTATTTTATCTTTGGTATTTTTTCTGGAGTTTTAGGAGCCTTCATGAGATTAAT
GATTCGTTCGGAGTTGCGAACTCCTGGAGG------AAGCATAATAAGAGAAGGCTCCTA
CAATATTCTAATTACCGCTCACGGCCTTATCATAATTTTTTTTTTTGTAATACCTGTTCT
TATGGGGGGGTTTGGAAATCTCCTTTTACCCCCAATGCTGGGATGTGGAGATATAGCATT
TCCTCGTCTTAACAATTTATCATTCTGATTCCTACCACCAAGTATAGGTTTGTTGATTTT
GAGAAGTCTTTCTGAGACAGGGGTTGTTAGCGGGTGGACTATCTACCCTCCAATAAGTAG
ATTGATTGGGCAACCAGGAATAAGAGTAGATTTAGCTATTTTTAGATTACACATTGCTGG
GGCGTCTTCTATTGGGAGATCTATTAATTTTTTGTGTACCATCATTAATTTACGTAATAT
TAGAATTTCATGAGAAAT--AATCCCACTATTTATTTGAACTGTTTTTTTTACCTCTATT
CTTCTGGTTTTTTCACTTCCTGTTTTTGCTGGTGGAATTACAATACTTCTCACAGATCGA
AATTTCAACACATCGTTTTTTGATCCTTCGGGGGGAGGAAATCCGGTCCTTTTCGTTCAT
TTATTT----------
>Acoela_Proconvoluta_sp1_IDAWSp_41_GBFR837887
-ACTCTTTATTTTATCTTTGGTATTTTTTTTGGGGTTTTAGGAGCCTTCATGAGATTAAT
GATTCGTTCGGAGTTGCGAACTCCTGGAGG------AAGCATAATAAGAGAAGGCTCCTA
CAATATTCTAATTACCGCTCACGGCCTTATCATAATTTTTTTTTTTGTAATACCTGTTCT
TATGGGGGGGTTTGGAAATCTCCTTTTACCCCCAATGCTGGGATGTGGAGATATAGCATT
TCCTCGTCTTAACAATTTATCATTCTGATTCCTCCCCCCAAGTATAGGTTTGTTGATTTT
GAGAAGTCTTTCTGAGACAGGGGTTGTTAGCGGGTGGACTATCTACCCTCCAATAAGTAG
ATTGATTGGGCAACCAGGAATAAGAGTAGATTTAGCTATTTTTAGATTACACATTGCTGG
GGCGTCTTCTATTGGGAGATCTATTAATTTTTTGTGTACCATCATTAATTTACGTAATAT
TAGAATTTCATGAGAAAT--AATCCCCCTATTTATTTGAACTGTTTTTTTTACCTCTATT
CTTCTGGTTTTTTCACTTCCTGTTTTTGCTGGTGGAATTACAATACTTCTCACAGATCGA
AATTTCAACACATCGTTTTTTGATCCTTCGGGGGGAGAAGACCCGGTTCTTTTCGTTCAT
TTATTT----------
>Acoela_Faerlea_sp1_IDUJ10_067_COI
GACTTTTTATTTCATTTTTGGGATTTTTTCTGGTGTTGTAGGGGCGATTATAAGTTTAAT
GATCCGTTTTGAGTTACGGTCCCCGGGGAG------GGGGATTTTAAATGAGAATGCTTA
TAATGTCCTGATTACAGCTCACGGTTTAATTATAATTTTTTTTTTTGTTATACCTGTTTT
AATGGGGGGATTTGGGAATTGACTTCTTCCCCCTATATTGGGGTGTGCGGATATGGCTTT
CCCACGTTTAAATAATTTTGCGTTTTGATTTCTCCCCCCAAGATTGAGACTTTTGCTCTT
AAGAAGACTTTCAGAAAGCGGAGTAGGTGCGGGATGGACTATTTATCCTCCGATAAGAAG
GTTAGTGGGGCAGCCTGGATTGAGGGTAGATTTGGCTATCTTTAGATTGCATATTGCTGG
AGCTTCTTCCATTGGAAGTTCGATCAATTTTCTTTGCACTATTATTAATCTTCGAAATAG
AAGAGTTTCCTGAGAAAC--TTTACCGCTTTTTATTTGGACGGTTTTTTTTACTGCTATC
CTATTAGTCTTTTCTCTTCCTGTTTTTGCTGGGGGAATCACAATGTTATTAACGGATCGA
AATTTTAACACATCGTTTTTTGATCCATCTGGAGGAGGAGATCCTGTTCTTTTTGTTCAT
TTATTT----------
>Acoela_Mecynostomum_auritum_IDUJ11_191_COI
CACCTTGTATTTCATTTTTGGAACTTTTGCTGGGATTTTAGGATCCATTATGAGACTTCT
AATTCGAACGGAGTTACGATTCACTGGTCC------AACAATAGTGAGGGAAAGAGTTTA
CAATGTTTTAATTACCGCTCATGGACTTATTATAATTTTTTTCTTTGTAATGCCTATCCT
AATGGGAGGTTTTAGAAATTGGTTGCTCCCCCTCATGTTGGGTTGCGCTGATATGGCTTT
CCCCCGATTAAATAATTTTTCTTTTTGACTCCTCCCCCCAAGATTAAGACTTCTAATCCT
GAGAAGGCTATCGGAGGCGGGAGTTGGAGGAGGATGAACTATTTATCCCCCCATAAGAAG
ATTAGTGGGGCAGCCTGGATTGAGTGTAGACTTAGCTATCTTTAGACTCCACATTGCTGG
GGCTTCTAGAATTGGGAGATCAATTAACTTTCTATGCACAATTATTAATTTACGTTTCCC
CCTAATAACGTGGGAAAT--GCTTCCTCTTTTTGTGTGAACAGTTTTTTTTACAGCAATT
CTTTTAGTTCTTTCTTTACCTGTTTTTGCCGGGGGAATTACTATATTGCTTACAGACCGA
AACTTCAACACATCCTTTTTCGACCCTTCTGGGGGGGGAGATCCTGTTTTATTTGTTCAT
CTTTTT----------
>Acoela_Mecynostomum_predatum_IDUJ11_305_COI
CACCTTGTATTTCATTTTTGGAACTTTTGCTGGGATTTTAGGATCCATTATGAGACTTCT
CATTCGAACGGAGTTACGATTCACTGGTCC------AACAATAGTGAGGGAAAGAGTTTA
CAATGTTTTAATTACCGCTCATGGACTTATTATAATTTTCTTCTTTGTAATGCCTATCCT
AATGGGAGGTTTTAGAAATTGGTTGCTCCCCCTCATGTTGGGTTGCGCTGATATGGCTTT
CCCCCGATTAAATAATTTTTCTTTTTGACTCCTCCCCCCAAGATTAAGACTTCTAATCCT
GAGAAGGCTATCGGAGGCGGGAGTTGGAGGAGGATGAACTATTTATCCCCCCATAAGAAG
ATTAGTGGGGCAGCCTGGATTGAGTGTAGACTTAGCTATCTTTAGACTCCACATTGCTGG
GGCTTCTAGAATTGGGAGATCAATTAACTTTCTATGCACAATTATTAATTTACGTTTCCC
CCTAATAACGTGGGAAAT--GCTTCCTCTTTTTGTGTGAACAGTTTTTTTTACAGCAATT
CTTTTAGTTCTTTCTTTACCTGTTTTTGCCGGGGGAATTACTATATTGCTTACAGACCGA
AACTTCAACACATCCTTTTTCGACCCTTCTGGGGGGGGAGATCCTGTTTTATTTGTTCAT
CTTTTT----------
>Acoela_Mecynostomum_haplovarium_IDUJ11_084_COI
CACCTTGTATTTCATTTTTGGAACTTTTGCTGGGATTTTAGGATCCATTATGAGACTTCT
CATTCGAACGGAGTTACGATTCACTGGTCC------AACAATAGTGAGGGAAAGAGTTTA
CAATGTTCTAATTACCGCTCATGGACTTATTATAATTTTTTTCTTTGTAATGCCTATCTT
AATGGGAGGTTTTAGAAATTGGTTGCTCCCCCTCATGTTGGGTTGCGCTGATATGGCTTT
CCCCCGATTAAATAATTTTTCTTTTTGACTCCTCCCCCCAAGATTAAGACTTCTAATCCT
GAGAAGGCTATCGGAGGCGGGAGTTGGAGGAGGATGAACTATTTATCCCCCAATAAGAAG
ATTAGTGGGGCAGCCTGGATTGAGTGTAGACTTAGCTATTTTTAGACTCCACATTGCTGG
GGCTTCTAGAATTGGGAGATCAATTAACTTTCTATGCACAATTATTAATTTACGTTTCCC
CCTAATAACGTGGGAAAT--GCTTCCTCTTTTTGTGTGAACAGTTTTTTTTACAGCAATT
CTTTTAGTTCTTTCTTTACCTGTTTTTGCCGGGGGAATTACTATATTGCTTACAGACCGA
AACTTCAACACATCCTTTTTCGACCCTTCTGGGGGGGGAGATCCTGTTTTATTTGTTCAT
CTTTTT----------
>Acoela_Mecynostomum_sp6_IDUJ11_246_COI
CACCTTGTATTTTATTTTTGGAACTTTTGCTGGGATTTTAGGATCCCTTATGAGACTTCT
CATTCGAACGGAGTTACGATTCACTGGTCC------AACAATAGTGAGGGAAAGAGTTTA
CAATGTTTTAATTACCGCTCACGGACTTATTATAATTTTTTTTTTTGTAATGCCTATCTT
AATGGGAGGTTTTAGAAATTGGTTGCTCCCCCTCATGTTGGGTTGCGCTGATATGGCTTT
CCCCCGATTAAATAATTTTTCTTTTTGACTCCTCCCCCCAAGATTAAGACTTCTAATCCT
GAGAAGGCTATCGGAGGCGGGAGTTGGAGGAGGATGAACTATTTATCCCCCAATAAGAAG
ATTAGTGGGGCAGCCTGGATTGAGTGTAGACTTAGCTATCTTTAGACTCCACATTGCTGG
GGCTTCTAGAATTGGGAGATCAATTAACTTTCTATGCACAATTATTAATTTACGTTTCCC
CCTAATAACGTGGGAAAT--GCTTCCTCTTTTTGTGTGAACAGTTTTTTTTACAGCAATT
CTTTTAGTTCTTTCTTTACCTGTTTTTGCCGGGGGAATTACTATATTGCTTACAGACCGA
AACTTCAACACATCTTTTTTCGACCCTTCTGGGGGGGGAAATCCTGTTTTATTTGTTCAT
CTTTTT----------
>Acoela_Mecynostomum_sp6_IDUJ11_275_COI
------------------------------------------------------------
-------------------------------------ACAATAGTGAGGGAAAGAGTTTA
CAATGTTTTAATTACCGCTCACGGACTTATTATAATTTTTTTTTTTGTAATGCCTATCTT
AATGGGAGGTTTTAGAAATTGGTTGCTCCCCCTCATGTTGGGTTGCGCTGATATGGCTTT
CCCCCGATTAAATAATTTTTCTTTTTGACTCCTCCCCCCAAGATTAAGACTTCTAATCCT
GAGAAGGCTATCGGAGGCGGGAGTTGGAGGAGGATGAACTATTTATCCCCCAATAAGAAG
ATTAGTGGGGCAGCCTGGATTGAGTGTAGACTTAGCTATCTTTAGACTCCACATTGCTGG
GGCTTCTAGAATTGGGAGATCAATTAACTTTCTATGCACAATTATTAATTTACGTTTCCC
CCTAATAACGTGGGAAAT--GCTTCCTCTTTTTGTGTGAACAGTTTTTTTTACAGCAATT
CTTTTAGTTCTTTCTTTACCTGTTTTTGCCGGGGGAATTACTATATTGCTTACAGACCGA
AACTTCAACACATCCTTTTTCGACCCTTCTGGGGGGGGAGATCCTGTTTTATTTGTTCAT
CATTTT----------
>Acoela_Paedomecynostomum_bruneum_IDAWSp_34_GBFR837874
-ACTCTTTATTTTGTTTTTGGAACTTTTTCAGGAATTTTAGGATCTTTTATAAGACTCCT
CATCCGGAGAGAGTTACGAGTCTCAGGCCC------TGCAGTTGTGAGTGAAAGAGTTTA
CAATGTTCTCATCACAGCTCATGGTCTTATCATAATCTTCTTTTTCGTAATACCAATTCT
TATGGGGGGCTTTAGGAATTGATTACTCCCCCTTATATTAGGTTGCGCTGATATGGCCTT
CCCCCGTTTAAATAATCTCTCATTCTGACTCCTCCCCCCAAGTTTAAGTTTACTTATTTT
AAGAAGACTATCAGAAACTGGGGTTGGGGCTGGTTGGACAATTTACCCACCAATAAGAAG
GCTAATTGGCCAACCAGGTCTCAGAGTAGATTTAGCAATTTTTAGCCTCCATATCGCAGG
TGCTTCAAGTATTGGTAGCTCCATTAACTTTCTATGCACTATTATTAATCTTCGTTTTCC
AATTATAACTTGAGAGAA--TCTCCCCCTCTTTGTTTGGACAATTTTTTTCACAGCTATT
TTACTTGTTCTCTCTCTTCCAGTTTTTGCTGGAGGAATTACAATATTATTAACAGATCGG
AATTTCAACACCTCCTTTTTTGATCCATCTGGGGGGGGGGACCCTGTTCTTTTCGTCCAT
CTTTTT----------
>Acoela_Paedomecynostomum_bruneum_IDUJ11_137_COI
GACTCTTTATTTTGTTTTTGGAACTTTTTCAGGAATTTTAGGATCTTTTATAAGACTCCT
TATCCGGAGAGAGTTACGAGTCTCAGGCCC------TGCAGTTGTGAGTGAAAGAGTTTA
CAATGTTCTCATCACAGCTCATGGTCTTATCATAATCTTCTTTTTCGTAATACCCATTCT
TATGGGGGGCTTTAGGAATTGATTACTCCCCCTCATATTAGGTTGCGCTGATATGGCCTT
CCCCCGTTTAAATAATCTCTCATTCTGACTCCTCCCCCCAAGTTTAAGTTTACTTATTTT
AAGAAGACTATCAGAAACTGGGGTTGGGGCTGGTTGGACAATTTACCCACCAATAAGAAG
GCTAATTGGCCAACCAGGTCTCAGAGTAGATTTAGCAATTTTTAGCCTCCATATCGCAGG
TGCTTCAAGTATTGGTAGCTCCATTAACTTTCTATGCACTATTATTAATCTTCGTTTTCC
AATTATAACTTGAGAGAA--TCTCCCCCTCTTTGTTTGGACAATTTTTTTCACAGCTATT
TTACTTGTTCTCTCTCTTCCAGTTTTTGCTGGAGGAATTACAATATTATTAACAGATCGG
AATTTCAACACCTCCTTTTTTGATCCATCTGGGGGGGGGGACCCTGTTCTTTTCGTCCAT
CTTTTT----------
>Acoela_Pseudmecynostomum_bruneofilum_IDAWSp_02_GBFR837897
----------------------------------------GGGTCTATAATAAGTCTTCT
TATCCGGAGGGAGTTACGAGTTGCAGGTCC------CACCATCTTAAGAGAGAGAGTATA
TAATGTATTAATTACAGCGCATGGTCTTATTATAATTTTTTTTTTTGAAATACCCATCCT
TATGGGGGGTTTTAGAAATTGATTACTACCGATAATATTGGGGTGTGTAGACATGGGGTT
TCCACGTCTCAATAACCTTTCCTTTTGGTTACTCCCACCAAGTCTTAGTCTATTACTTTT
AAGGAGCTTAGCTGAAGCTGGAGTTGGAGCTGGTTGGACAATCTACCCCCCAATGAGAGG
GCTTGTTGGTCAACCTGGTATAAGGGTGGATTTGGCTATTTTCAGCCTCCACATTGCAGG
GGCTTCAAAAATCGGAAAATCAATCAATTTTCTTTGCACAATTATTAATTTACAATTCCC
ATTAATAACTTGAGAAAA--TTTACCACTCTTTGTTTGGACTGTTTTTTTCACAGCTATT
CTTCTTATTTTATCCCGGCCCGTTTTTGCGGGGGGTATCACCATACTTCTTACAGATCGA
AATTTTAATACATCATTTTTTGACCCATCGGGGGGGGGA---------------------
----------------
>Acoela_Pseudmecynostomum_bruneophilum_IDUJ11_251_COI
TACTTTGTACTTCCTTTTTGGGGCTTTTTCTGGAATCTTAGGGTCGATAATAAGTCTTCT
TATCCGGAGGGAGTTACGAGTTGCAGGTCC------CACCATCTTAAGAGAGAGAGTATA
TAATGTATTAATTACAGCGCATGGTCTTATTATAATTTTTTTTTTTGTTATACCCATCCT
TATGGGTGGTTTTAGAAATTGATTACTACCAATAATATTGGGGTGTGTAGACATGGCGTT
TCCACGTCTCAATAACCTTTCCTTTTGATTACTCCCACCAAGTCTTAGTTTGTTACTTTT
GAGGAGCTTAGTTGAAGCTGGAGTTGGAGCTGGTTGGACAATCTACCCCCCAATGAGAGG
GCTTGTTGGTCAACCTGGTATGAGGGTGGATTTGGCTATTTTCAGCCTCCACATTGCAGG
TGCTTCAAGAATTGGAAGATCAATCAATTTTCTTTGCACAATTATCAATTTACGATTCCC
ATTAATAACTTGAGAGAA--TTTACCACTCTTTGTTTGGACTGTTTTTTTTACAGCTATT
CTTCTTATTTTATCCCTGCCTGTTTTCGCTGGGGGTATCACTATACTTCTTACAGATCGA
AATTTTAATACATCATTTTTTGACCCATCGGGGGGGGGAGATCCTGTTCTTTTTGTCCAC
CTTTTT----------
>Acoela_Aphanostoma_collinae_IDMHMa14_GBFR837843
-ACTCTTTATTTCTTATTTGGGATATGATCAGGATTTATTGGTACTTTAATAAGACTACT
AATTCGAAGGGAGTTACGAAATTCTGGATC------TAGAACTTTAAGAGAAAAAATTTA
TAATGTGACTATCACGGCCCACGGACTTATCATAATTTTTTTTTTTGTTATGCCTGTTTT
AATAGGAGGGTTTGGTAATTGATTAATTCCTCTTATATTGGGATGCGCCGATATGGCTTT
CCCTCGTTTAAATAATTTATCCTTTTGATTTTTGCCTCCTAGTTTTAGATTATTAATTTT
AAGAAGATTAGTAGAATCCGGAGTAGGTAGTGGTTGGACAATTTACCCTCCTATAAGAGA
TTTAATTGGACAGCCAGGCATAAGAGTAGATTTTGCTATTTTTAGTTTACATATTGCTGG
AGCCAGCTCCATTGGGGGGAGAATTAATTTTCTATGCACAATTATTAATTTACGTGGTCG
AGGAATAACATGGCAAGA--ATTGCCTTTGTTTGTGTGGGGAATGTTTTTTACAACTATT
CTACTAATTCTTTCATTGCCTGTTTTTGCCGGAGGAATTACAATACTACTAACTGATCGA
AATTTTAATACAAGATTTTTTATTCCAGGAGGAGGAGGGGACCCAATTTTATTTGAACAT
CTATTT----------
>Acoela_Aphanostoma_sp_IDAWHel_19_GBFR837844
-ACTCTATATTTTATTTTTGGCATGTGAGCTGGTTTTATTGGAACTTTAATGAGAGTTTT
AATCCGATCTGAATTACGAAATCCAGGAGC------AGTATTATTGAGAGAGAAAAGATA
TAATGTGACTATTACTGCCCATGGATTAATTATAATTTTTTTCTTTGTAATGCCAGTACT
GATGGGGGGGTTTGGGAATTGATTAATTCCATTGAGGTTAGGATGTGCAGATATGGCCTT
TCCACGTCTGAACAATTTTTCTTTTTGACTTCTCCCTCCTAGATTTAGACTTCTAGTCTT
AAGAAGACTGGTGGAATCGGGAGTGGGAGGGGGTTGAACTCTATACCCCCCAATGAGGGA
TTTAATTGGACAACCTGGGATAAGAGTGGATCTGGCTATTTTTAGCCTTCACATTGCCGG
AGCCTCCTCCATTGGTGGCTCTATTAATTTCCTGTGTACTATTATTAATTTACGAAGACG
AATTATAACTTGGCAAGA--ATTACCACTATTTATTTGGAGGATTTTTTTTACAGCTATT
TTATTAGTTCTCTCACTTCCCGTATTTGCAGGAGGAATTACCATACTCTTAACAGATCGT
AATTTCAATACAAGATTTTTTACCCCAAGGGGTGGGGGAGATCCCATTCTTTTTGTTCAT
CTCTTT----------
>Acoela_Praeconvoluta_castinea_IDMHMa7_GBFR837890
-ACTTTATATTTTATTTTTGGTATATGAGCTGGTTTCATTGGTACTTTGATAAGAGTTTT
AATTCGATCAGAATTACGAAATCCAGGATC------TATAATATTAAGAGAAAAAAGATA
TAATGTAACCATCACAGCACATGGTCTAATTATAATTTTTTTTTTTGTGATACCAGTATT
AATGGGAGGATTTGGTAATTGACTAATTCCATTAAGTTTAGGATGTGCAGATATAGCTTT
CCCACGTCTCAATAATTTTTCTTTCTGACTTCTCCCTCCCAGTTTTAGACTTTTAATCTT
AAGAAGATTGGTGGAATCTGGAGTTGGGGGAGGATGAACATTATATCCACCAATAAGAGA
TTTGATTGGACAACCGGGCATAAGAGTTGATTTAGCTATTTTTAGACTCCATATTGCAGG
AGCATCCTCTATTGGAGGATCAATTAATTTTTTATGCACTATTATTAATTTACGAAGACG
AATTATAACTTGACAGGA--ATTACCTCTTTTTATTTGGAGAATTTTCTTCACAGCTATT
TTACTAGTACTTTCTCTACCTGTATTCGCAGGAGGTATTACCATACTACTAACTGATCGA
AATTTTAATACTAGATTTTTCACTCCTGGTGGAGGAGGGGATCCCATTCTTTTTGTCCAT
CTTTTT----------
>Acoela_Isodiametra_norvegica_IDMHMa8_GBFR837870
-ACTCTTTATTTTATTTTTGGCATATGGGCCGGATTTATTGGAACACTCCTCAGAGTCCT
GATTCGAAGAGAACTTTGAAACCCCGGAGC------TGTTTCAATAAGAGAAAAAAGATA
CAACGTAACTATTACTTCTCATGGTTTAATTATAATTTTTTTTTTTGTTATGCCCGTTTT
AATAGGGGGATTCGGAAACTGATTAATTCCTCTTATATTAGGCTGTGCTGATATAGCCTT
TCCTCGATTAAATAATTTTTCTTTTTGACTTCTTCCCCCAAGATTTAGTTTATTAATTTT
AAGAAGTTTAGTGGAAACCGGAGTAGGAGGTGGGTGAACCTTATACCCTCCTATAAGAGA
CTTAGTTGGTCAACCAGGGATAAGAGTTGATTTAGCTATTTTTAGGCTTCATATCGCAGG
AGCTTCCTCCATTGGAGGATCTATTAATTTTTTATGTACAATTATTAATCTACGAAGACG
TATCATAACCTGGCAAAA--TTTACCATTATTTATTTGAAGGATTTTTTTTACTGCTATT
TTATTGGTCTTATCTCTTCCTGTTTTTGCAGGAGGTATTACAATATTACTAACAAATCGT
AATTTTAATACTAGATTTTTTACCCCGGGGGGTGGAGGAGATCCAATTCGGTTTGTTCAT
CTTTTT----------
>Acoela_Isodiametra_bajaensis_IDMHIb_GBFR837867
-ACTTTGTATTTTATTTTTGGGATTTGATCTGGATTAGTTGGAACTTTGTTAAGACTTTT
GATTCGAACAGAATTACGAGCAGGGGGAGG------TAACTTCATTAGAGAAAAAAGATA
CAACGTAACTATTACTGCTCATGGTCTAATTATAATCTTTTTTTTTGTAATACCTATCTT
GATGGGGGGCTTTGGAAACTGATTACTTCCTCTTATACTGGGGTGTGCTGACATAGCTTT
TCCTCGTTTAAACAACTTTTCTTTTTGACTCCTTCCCCCGAGCCTAAGATTACTAATTCT
AAGAAGACTAGTAGAAACAGGAGTTGGAGGAGGGTGGACTATCTATCCTCCTATAAGAGA
TCTAGTTGGACAGCCAGGAATGAGAGTTGATTTAGCTATTTTTTCTCTCCATATTGCAGG
GGCTTCTTCTATTGGGGGATCAATTAATTTTTTATGTACTATTATTAATTTACGAAGTTC
TAACATGACTTGACAAGA--ACTTCCTTTGTTTATTTGGAGAGTTTTTTTTACAGCAATT
CTTTTAGTTTTATCTCTCCCTGTTTTTGCTGGGGGAATTACAATACTACTTACAGATCGT
AATTTTAATACGAGATTTTTTACTCCCGGAGGAGGGGGAGACCCAGTTCTCTTTGTTCAC
CTTTTT----------
>Acoela_Isodiametra_finkei_IDUJ12_030_GBKF578504
AACATTATACTTTTTGTTTGGAATTTGATCAGGATTAATCGGAACTTTATTAAGTTTTCT
CATTCGAACTGAATTACGAAATGGGGGATC------AAATTTAATTAGGGAAAAAAGGTA
TAATGTGACCATTACAGCCCATGGGCTAATTATAATTTTCTTTTTTGTTATACCTATTCT
AATGGGAGGTTTCGGAAATTGACTCCTTCCCCTTATACTCGGATGTGCTGATATGGCTTT
TCCTCGTCTAAACAATTTTTCTTTTTGATTACTACCCCCTAGACTAAGTTTATTAATTTT
AAGAAGATTAGTAGAAACGGGTGTAGGAAGAGGTTGAACAATCTATCCCCCAATAAGAGA
TTTAGTGGGACAACCAGGTATGAGAGTGGATTTAGCAATTTTTAGCCTCCATATTGCGGG
AGCTTCTTCTATTGGAGGATCAATTAATTTCTTATGTACAATTATTAATTTACGGAGATC
TAATATAACTTGACAGGA--GTTACCTCTCTTTATTTGAAGGGTTTTTTTCACCGCTATC
TTACTTGTCCTCTCACTCCCTGTTTTTGCTGGAGGAATCACCATACTACTAACAGATCGT
AATTTTAATACCAGATTTTTTACTCCTGGTGGAGGAGGGGATCCTGTTTTATTTGTTCAT
TTATTT----------
>Acoela_Isodiametra_finkei_IDUJ12_034_GBKF578506
AACATTATACTTTTTGTTTGGAATTTGATCAGGATTAATCGGAACTTTATTAAGTTTTCT
CATTCGAACTGAATTACGAAATGGGGGATC------AAATTTAATTAGGGAAAAAAGGTA
TAATGTGACCATTACAGCCCATGGGCTAATTATAATTTTCTTTTTTGTTATACCTATTCT
AATGGGAGGTTTCGGAAATTGACTCCTGCCCCTTATACTTGGATGTGCTGATATGGCTTT
TCCTCGTCTAAACAATTTTTCTTTTTGATTACTACCCCCTAGACTAAGTTTATTAATTTT
AAGAAGATTAGTAGAAACGGGTGTAGGAAGGGGTTGAACAATCTATCCCCCAATAAGAGA
TTTAGTGGGACAACCAGGTATGAGAGTGGATTTAGCAATTTTTAGCCTCCATATTGCGGG
AGCTTCTTCTATTGGAGGATCAATTAATTTCTTATGTACAATTATTAATTTACGGAGATC
TAATATAACTTGACAGGA--GTTACCTCTCTTTATTTGAAGGGTTTTTTTCACCGCTATC
TTACTTGTCCTCTCACTCCCTGTTTTTGCTGGAGGAATCACCATACTACTAACAGATCGT
AATTTTAATACTAGATTTTTTACTCCTGGTGGAGGAGGGGATCCTGTTTTATTTGTTCAT
TTATTT----------
>Acoela_Isodiametra_finkei_IDUJ12_033_GBKF578505
AACATTATACTTTTTGTTTGGAATTTGATCAGGATTAATCGGAACTTTATTAAGTTTTCT
CATTCGAACTGAATTACGAAATGGGGGATC------AAATTTAATTAGGGAAAAAAGGTA
TAATGTGACCATTACAGCCCATGGGCTAATTATAATTTTCTTTTTTGTTATACCTATTCT
AATGGGAGGTTTCGGAAATTGACTCCTGCCCCTTATACTCGGATGTGCTGATATGGCTTT
TCCTCGTCTAAACAATTTTTCTTTTTGATTACTACCCCCTAGACTAAGTTTATTAATTTT
AAGAAGATTAGTAGAAACGGGTGTAGGAAGGGGTTGAACAATCTATCCCCCAATAAGAGA
TTTAGTGGGACAACCAGGTATGAGAGTGGATTTAGCAATTTTTAGCCTCCATATTGCGGG
AGCTTCTTCTATTGGAGGATCAATTAATTTCTTATGTACAATTATTAATTTACGGAGATC
TAATATAACTTGACAGGA--GTTACCTCTCTTTATTTGAAGGGTTTTTTTCACCGCTATC
TTACTTGTCCTGTCACTCCCTGTTTTTGCTGGAGGAATCACCATACTACTAACAGATCGT
AATTTTAATACCAGATTTTTTACTCCTGGTGGGGGAGGGGATCCTGTTTTATTTGTTCAT
TAATTT----------
>Acoela_Raphidophallus_actuosus_IDMHMa12_GBFR837899
-ACACTATATTTTATTTTTGGTATTTGATCAGGTTTTATTGGAACACTATTAAGCCTTTT
AATTCGAACAGAATTACGAAATGGAGGATC------AATAATTATTAGAGAAAAAAGTTA
TAATGTAACTATTACAGCCCATGGATTAATTATAATTTTCTTTTTTGTTATACCTATTTT
AATAGGAGGTTTTGGAAATTGATTGCTACCTTTAATATTAAGATGTGCGGATATGGCATT
TCCTCGATTAAATAATTTTTCTTTTTGATTATTACCACCTAGATTAAGTCTTTTAATTTT
AAGAAGGCTAGTAGAAACAGGAGTGGGAAGAGGTTGGACAATTTACCCCCCAATAAGAGA
TCTAGTAGGTCAACCAGGAATAAGAGTAGATTTAGCAATTTTTAGTCTCCATATTGCCGG
AGCATCCTCTATTGGAGGATCTATTAATTTCTTATGCACTATTATTAATTTACGAAGACG
ACATATATCTTGACAAGA--ACTTCCTTTATTTATTTGAAGAGTGTTTTTTACTGCCATT
TTATTAGTTTTATCATTACCAGTTTTTGCTGGTGGTATTACCATACTATTAACAGATCGT
AATTTTAATACAAGATTTTTTGTACCAAGAGGAGGGGGAGACCCAGTTTTATTTGTTCAT
CTTTTT----------
>Acoela_Isodiametra_nicki_IDMHMa16_GBFR837869
-ACTCTTTATTTTATTTTTGGAATTTGATCCGGTTTTGTAGGAACATTATTAAGTTTATT
AATTCGAAGAGAATTACGTAATGGGGGAGC------TAATTTAATTAGGGAAAAAAGATA
TAACGTGACGATTACAGCTCATGGATTAATTATAATTTTCTTTTTTGTAATACCTATTTT
GATAGGAGGTTTTGGAAATTGACTTCTTCCATTAATATTAGGGTGCGCTGATATAGCTTT
TCCTCGATTAAATAATTTATCTTTTTGATTTCTTCCACCTAGATTAAGACTATTAATTTT
AAGAAGCTTAGTCGAAACAGGAGTAGGGAGAGGATGAACTATCTACCCCCCAATAAGGGA
TTTAGTTGGCCAACCAGGAAGAAGTGTTGATTTTGCTATTTTTAGACTACATATTGCTGG
TGCCTCCTCTATTGGAGGTTCTATTAACTTTCTTTGTACAATTATTAATTTACGTAGACG
TAGAATAACTTGACAAGA--ACTTCCTCTTTTTGTTTGGAGAGTTTTTTTTACAGCCATT
TTACTTGTTTTGTCTCTCCCTGTTTTTGCTGGAGGAATTACTATATTATTAACTGATCGA
AATTTTAACACTAGATTTTTTACCCCAGGAGGGGGGGGAGATCCGGTTCTCTTTGTACAT
TTATTT----------
>Acoela_Isodiametra_vexillaria_IDUJCove_GBFR837871
-ACTCTTTATTTTATTTTTGGTATTTGATCTGGATTTGTAGGAACTCTATTGAGCGTTCT
TATTCGTTCAGAATTACGTAATAGGGGAAC------AAGTCTTATTAGAGAAAAAAGATA
TAATGTCACTATTACAGCCCATGGCTTAATTATAATTTTTTTTTTTGTGATGCCTATTTT
AATAGGGGGATTTGGAAATTGACTTTTACCACTAATATTAGGATGTGCCGATATGGCATT
CCCTCGTTTAAATAATTTTTCTTTTTGATTACTTCCTCCAAGATTAAGATTACTTATCTT
AAGAAGATTAGTTGAAAGAGGAGTAGGAGGAGGATGAACCATTTATCCACCTATAAGAGA
TTTAATTGGACATCCCGGGATAAGTGTAGATTTAGCAATTTTTAGTCTTCATATTGCTGG
TGCTTCTTCAATTGGAGGATCTATTAATTTTTTATGCACTATTATTAATTTGCCAAGACG
AACAATAACATGACAAGA--ATTACCATTATTTATTTGAAGAGTTTTTTTTACAGCTATT
CTTTTAGTTCTTTCTTTACCAGTTTTTGCCGGAGGAATCACTATATTATTAACTGATCGT
AATTTTAATACCAGGTTCTTTACGCCAAGAGGAGGAGGGGACCCAGCCTTATTTGAACAT
TTATTT----------
>Acoela_Isodiametra_sp11_IDUJ12_012_COI
GACTTTATATTTTCTTTTTGGTGTTTGATCTGGCTTGATCGGGACCCTGCTCAGGTT-TT
AATCCGGACTGAGTTACGAAGAGGAGGGGC------AAACTTAATTAGAGAGAAAAGATA
CAATGTGACTATCACAGCACATGGCCT--TTATAATTTTTTTTTTTGTAATACCCATTCT
CATGGGTGGGTTTGGAAATTGACTTCTCCCGTTAATACTGGGTTGTGCCGACATGGCTTT
CCCCCGATTAAATAATTTCTCGTTTTGGCTTTTACCTCCCAGACTTAGATTATTAATTTT
AAGAAGACTGGTGGAAACTGGTGTGGGAAGAGGATGGACTATCTATCCCCCAATAAGGGA
TTTGGTTGGGCAACCAGGCATAAGAGTTGATTTGGCCATTTTCAGACTTCATATCGCAGG
AGCTTCTTCTATTGGTGGTTCCATTAATTTTCTTTGTACAATTATTAATTTACGAAGATC
AAGAATGACTTGGCAGGA--TCTCCCCCTCTTTATTTGGAGAGTTTTTTTCACAGCTATT
TTACTAGTTCTTTCCTTACCAGTTTTTGCGGGTGGTATTACTATACTTCTCACAGATCGA
AATTTTAATACTAGATTTTTTTCCCCTGGTGGTGGGGGAGAACCGGTTCTATTTGTCCAT
TTATTT----------
>Acoela_Isodiametra_sp11_IDUJ12_015_COI
----------------------------------------GGGACCCTGCTTAGGTTTCT
AATCCGGACTGAGTTACGAAGAGGAGGGGC------AAACTTAATTAGAGAGAAAAGATA
CAATGTGACTATCACAGCACATGGCCTTATTATAATTTTTTTTTTTGTAATACCCATTCT
TATGGGTGGGTTTGGAAATTGACTTCTCCCGTTAATACTGGGTTGTGCCGACATGGCTTT
CCCCCGATTAAATAATTTCTCGTTTTGGCTTTTACCTCCCAGACTTAGATTATTAATTTT
AAGAAGACTGGTGGAAACTGGTGTGGGAAGAGGATGGACTATCTATCCCCCAATAAGGGA
TTTGGTTGGGCAACCAGGCATAAGAGTTGATTTGGCCATTTTCAGACTTCATATCGCAGG
AGCTTCTTCTATTGGTGGTTCCATTAATTTTCTTTGTACAATTATTAATTTACGAAGATC
AAGAATGACTTGGCAGGA--TCTCCCCCTCTTTATTTGGAGAGTTTTCTTCACAGCTATT
TTACTAGTTCTTTCCTTGCCAGTTTTTGCGGGTGGTATTACTATACTTCTCACAGATCGA
AATTTTAATACTAGATTTTTTTCCCCTG--GGGGGGGGAGATCCTGTTCTATTTGTTCAT
TTATTT----------
>Acoela_Praeconvoluta_tigrina_IDMHMa6_GBFR837891
-AGACTTTATTTTATTTTTGGGATATGAGCTGGCTTTATTGGGACTCTACTAAGAGTTCT
TATTCGAGCTGAACTGCGGAACTCGGGAGC------TATATTAATTAGAGAAAAAAGATA
TAATGTGACCATTACTAGACATGGATTAATTATAATCTTTTTTTTTGTTATACCGGTATT
GATGGGGGGATTTGGTAATTGGTTATTACCCTTAAGATTAGGCTGTGCCGATATAGCTTT
CCCACGATTAAATAATTTTTCTTTTTGACTTTTACCCCCGAGATTCTCTTTATTAATCTT
AAGAAGATTATCAGAAGCTGGAGTGGGAGGAGGTTGAACTATTTACCCTCCCATAAGAGA
TTTAGTGGGACAACCTGGCATGAGAGTTGATTTAGCAATTTTCAGATTACATATTGCTGG
AGCTTCTTCTATTGGGGGTTCTATTAATTTTCTTTGCACTATTATTAATTTACGAAGATG
TTTAATAACTTGGCAAGA--ACTTCCTTTATTTATTTGGAGGGTATTTTTTACAGCTATT
CTTCTTGTTTTATCTCTACCAGTATTCGCTGGAGGAATCACTATGTTATTAACAGATCGA
AATTTTAATACTAATTTTTTCACTCCCAGAGGGGGGGGGGACCCAATTCAATTTGTTCAT
CTATTT----------
>Acoela_Archaphanostoma_agile_IDUJ11_202_COI
AACATTATATTTTATTTTTGGAGCATGGGCAGGATTAATTGGAACTTTATTAAGAATATT
AATTCGTCAAGAATTACGTAATCCAGGGAG------AGGTTTAATTAGGGAAAAGAGTTA
TAATGTGACCATTACTTCCCATGGTTTAATCATAATTTTTTTTTTTGTTATACCAGTTCT
TATGGGTGGGTTTGGAAATTGATTACTTCCCCTAATATTAGGGTGTGCGGATATAGCATT
TCCACGTTTAAATAATTTTTCTTTTTGACTTCTCCCACCAAGATTTAGATTACTTCTCTT
GAGAAGATTTGCTGAAAGAGGAGTGGGAGGGGGGTGGACTCTTTATCCTCCCATGAGAGA
TTTAATTGGTCAACCGGGAATGAGAGTAGATTTAGCCATCTTTAGTTTACACATTGCTGG
AGCTTCTTCTATTGGGGGATCAATTAATTTCCTTTGTACAATTATTAATCTCCGGAGGAT
TGTTATAACTTGACAAGA--ACTTCCTTTATTTGTTTGAAGGGTATTTTTCACAGCAATT
CTTTTGATTTTATCACTCCCTGTTTTTGCAGGAGGGATCACCATACTTCTCACTGATCGC
AATTTTAACACTAGATTTTTCACTCCAGGAGGGGGAGGTGACCCTGTTCTTTTTGTTCAT
CTTTTT----------
>Acoela_Archaphanostoma_agile_IDUJ13_327_COI
AACATTATATTTTATTTTTGGAGCATGGGCAGGATTAATTGGAACTTTATTAAGAATATT
AATTCGTCAAGAATTACGTAATCCAGGGAG------AGGTTTAATTAGGGAAAAGAGTTA
TAATGTGACCATTACTTCCCATGGTTTAATCATAATTTTTTTTTTTGTTATACCAGTTCT
TATGGGTGGGTTTGGAAATTGATTACTTCCCCTAATATTAGGGTGTGCGGATATAGCATT
TCCACGTTTAAATAATTTTTCTTTTTGACTTCTCCCACCAAGATTTAGATTACTTCTCTT
GAGAAGATTTGCTGAAAGAGGAGTGGGAGGGGGGTGGACTCTTTATCCTCCCATGAGAGA
TTTAATTGGTCAACCGGGAATGAGAGTAGATTTAGCCATCTTTAGTTTACACATTGCTGG
AGCTTCTTCTATTGGGGGATCAATTAATTTCCTTTGTACAATTATTAATCTCCGGAGGAT
TGTTATAACTTGACAAGA--ACTTCCTTTATTTGTTTGAAGGGTATTTTTCACAGCAATT
CTTTTGATTTTATCACTCCCTGTTTTTGCAGGAGGGATCACCATACTTCTCACTGATCGC
AATTTTAACACTAA--TTTTTCACTCCGGAGGGGGAGGTGACCCTGTTCTTTTTGTTCAC
CTTTTT----------
>Acoela_Mecynostomum_minimum_IDUJ14_035_COI
AACACTTTATTTTATTTTTGGAACATGGGCAGGCTTTATTGGAACTCTCTTGAGAGTGTT
AATTCGTCAAGAATTACGGACTCCGGGCAT------AAATTTAATTAGAGAAAAAAGATA
TAATGTGACTATTACAGCTCATGGTTTAATTATAATTTTTTTTTTTGTTATACCTGTGCT
CATAGGAGGTTTTGGAAACTGGCTGATTCCTCTAATGCTCGGATGTGCAGATATAGCTTT
TCCTCGTCTCAATAATTTTTCCTTTTGGCTTCTCCCTCCTAGTTTTAGCCTCCTTATCTT
AAGCAGGCTAGCTGAAAGAGGAGTAGGAGGAGGATGGACCCTTTATCCGCCTATAAGAGA
TTTAATTGGACAACCCGGAATGAGGGTTGATTTAGCTATTTTTAGACTTCATATTGCGGG
AGCTTCTTCCATTGGAGGGTCAATTAATTTTTTATGCACTATTATCAACCTTCGAACTCC
TTCCATTACCTGGCAGCA--GCTTCCTTTATTAATTTGGAGAATTTTTTTTACAGCCATT
CTTCTTGTTCTTTCTCTGCCTGTTTTTGCGGGGGGGATTACCATGCTCCTCACGGATCGG
AATTTTAATACAAGATTTTTTTCCCCTAGCGGGGGAGGAGATCCTGTTCTCTTTGTTCAT
CTTTTT----------
>Acoela_Archaphanostoma_macrospiriferum_IDUJ07_18_GBFR837845
-ACTTTATATTTTTTATTTGGAGGATGAGCTGGATTGATTGGAACTCTATTAAGAGTTTT
AATCCGCCAGGAATTACGAAATCCAGGTAG------GGGGTTGATTAGTGAAAAAAGATA
CAATGTGACTATCACGTCTCACGGTTTAATTATAATTTTTTTTTTCGTTATACCTGTTTT
AATAGGAGGTTTTGGTAATTGACTCCTTCCCCTTTTATTAGGATGTGCCGATATAGCTTT
CCCACGACTTAATAATTTCTCATTTTGACTCCTTCCTCCAAGATTTAGACTTCTTCTATT
AAGAAGATTAGCTGAAAGAGGAGTGGGAGGAGGATGAACTCTTTATCCCCCCATAAGGGA
TCTTTTGGGCCAACCAGGGATAAGAGTTGATTTAGCTATTTTTAGACTCCATATTGCTGG
AGCTTCTTCTATTGGTGGGTCAATTAATTTTCTGTGCACTATTATTAATCTTCGAAGATT
AAGAATGTCTTGACAGGA--ATTACCTCTTTTTGTCTGGAGAGTTTTTTTTACAGCGATT
CTTTTAGTACTTTCTCTTCCTGTCTTTGCTGGAGGAATTACTATACTTCTAACAGATCGA
AATTTTAATACGAGATTTTTCACTCCTGGAGGTGGTGGAGATCCTGTTTTATTTGTTCAT
TTATTT----------
>Acoela_Archaphanostoma_macrospiriferum_IDUJ13_263_COI
-ACCCTATATTTCTTGTTTGGCGGATGGGCCGGTCTTATTGGAACTCTATTAAGAGTTTT
AATCCGTCAAGAATTACGAAATCCAGGTAG------GGGTTTAATTAGTGAAAAAAGATA
TAATGTGACAATTACGTCTCACGGTTTAATTATAATTTTTTTTTTTGTCATACCTGTTTT
AATAGGAGGTTTTGGCAATTGACTTCTTCCCCTATTATTAGGATGTGCAGATATAGCCTT
CCCACGACTCAATAATTTTTCATTTTGACTACTCCCCCCAAGATTTAGACTTCTTTTGTT
AAGAAGATTAGCTGAAAGAGGAGTGGGAGGGGGATGAACTCTTTATCCTCCTATAAGGGA
TCTTCTAGGCCAACCAGGCATAAGAGTAGATTTAGCTATTTTTAGGCTTCACATTGCTGG
TGCTTCTTCTATTGGTGGATCAATTAATTTTCTTTGCACTATTATTAATCTGCGAAGATT
GAGAATGTCGTGACAGGA--ATTACCTCTTTTTGTTTGAAGAGTTTTTTTTACAGCGATT
CTTTTAGTACTTTCTCTTCCTGTCTTTGCTGGGGGAATTACTATGCTTCTAACAGATCGA
AATTTTAATACTAGATTTTTTACACCAG--------------------------------
----------------
>Acoela_Archaphanostoma_sp1_IDUJ11_224_COI
TAGTCTATATTTTATTTTTGGTGCTTGAGCTGGTCTTATTGGCACTCTTTTAAGAGTGTT
AATCCGACAAGAACTTCGTAATCCAGGTGC------AGGCTTAATTAGAGAAAAAAGATA
TAATGTTACTATTACATCACATGGTTTAATTATAATTTTTTTTTTTGTTATACCAGTGTT
GATAGGAGGTTTTGGAAATTGACTACTGCCGTTAATACTTGGTTGTGCTGATATAGCTTT
TCCTCGTTTAAATAATTTTTCTTTTTGATTACTCCCCCCCAGTTTTAGTTTATTAATTCT
TAGAAGACTCGCAGAAAGAGGAGTTGGAGGAGGGTGAACACTTTATCCCCCCATAAGTGA
TTTAATGGGTCAACCAGGAATAAGAGTTGATTTGGCTATTTTCAGATTACATATTGCGGG
AGCTTCCTCCATTGGAGGTTCTATTAACTTTTTATGTACTATTATTAATTTACGAACTCC
TGGAATAACATGACAAGA--ATTACCTCTTTTTATTTGAAGAGTGTTTTTTACAGCTATT
TTATTAGTTCTTTCTTTACCAGTTTTTGCAGGTGGGATTACCATACTTTTAACAGATCGT
AATTTTAATACTAGATTTTTTACTCCAGGAGGAGGAGGAAATCCAGTTTTATTTGTACAT
TTATTT----------
>Acoela_Archaphanostoma_sp1_IDUJ11_225_COI
TAGTCTATATTTTATTTTTGGTGCTTGAGCTGGTCTTATTGGCACTCTTTTAAGAGTGTT
AATCCGACAAGAACTTCGTAATCCAGGTGC------AGGCTTAATTAGAGAAAAAAGATA
TAATGTTACTATTACATCACATGGTTTAATTATAATTTTTTTTTTTGTTATACCAGTGTT
GATAGGAGGTTTTGGAAATTGACTACTGCCGTTAATACTTGGTTGTGCTGATATAGCTTT
TCCTCGTTTAAATAATTTTTCTTTTTGATTACTCCCCCCCAGTTTTAGTTTATTAATTCT
TAGAAGACTCGCAGAAAGAGGAGTTGGAGGAGGGTGAACACTTTATCCCCCCATAAGTGA
TTTAATGGGTCAACCAGGAATAAGAGTTGATTTGGCTATTTTCAGATTACATATTGCGGG
AGCTTCCTCCATTGGAGGTTCTATTAACTTTTTATGTACTATTATTAATTTACGAACTCC
TGGAATAACATGACAAGA--ATTACCTCTTTTTATTTGAAGAGTGTTTTTTACAGCTATT
TTATTAGTTCTTTCTTTACCAGTTTTTGCAGGTGGGATTACCATACTTTTAACAGATCGT
AATTTTAATACTAGATTTTTTACTCCAGGAGGAGGAGGAGATCCAGTTTTATTTGTACAT
TTATTT----------
>Acoela_Archaphanostoma_sp3_IDUJ11_276_COI
TAGTCTGTATTTCATTTTCGGAGCTTGAGCTGGTCTTATTGGAACTCTGTTAAGAGTATT
AATTCGGCAAGAACTTCGTAATCCAGGTTC------TGGACTTATTAGGGAAAAGAGATA
TAATGTTACGATTACCTCCCATGGATTAATTATAATTTTTTTTTTTGTTATGCCGGTTCT
GATGGGGGGATTTGGAAACTGACTTCTGCCTCTAATACTAGGCTGTGCTGACATGGCTTT
TCCCCGATTAAATAATTTTTCTTTTTGACTTCTCCCCCCCAGATTCAGATTACTGGTTCT
AAGCAGATTGGCTGAAAGAGGAGTTGGAGGAGGCTGGACGTTGTACCCCCCTATAAGAGA
TTTAATGGGACAACCGGGGATAAGAGTGGACTTGGCTATCTTTAGGTTACATATTGCCGG
AGCTTCTTCTATTGGGGGGTCAATTAACTTTCTCTGCACTATTATTAATTTGCGGACTCC
TGGAATAACATGGCAAGG--TTTGCCTCTATTTATTTGAAGAATTTTTTTTACTGCTATT
TTACTAGTTCTTTCCCTGCCAGTTTTTGCAGGAGGTATCACTATGCTTTTAACTGATCGG
AACTTCAATACTAGGTTTTTCACTCCAGGAGGGGGGGGAGATCCTGTTTTATTTGTCCAT
CTTTTT----------
>Acoela_Archaphanostoma_sp3_IDUJ11_277_COI
TAGTCTGTATTTCATTTTCGGAGCTTGAGCTGGTCTTATTGGAACTCTGTTAAGAGTATT
AATTCGGCAAGAACTTCGTAATCCAGGTTC------TGGACTTATTAGGGAAAAGAGATA
TAATGTTACGATTACCTCCCATGGATTAATTATAATTTTTTTTTTTGTTATGCCGGTTCT
GATGGGAGGATTTGGAAACTGACTTCTGCCTCTAATACTAGGCTGTGCTGACATGGCTTT
TCCCCGATTAAATAATTTTTCTTTTTGACTTCTCCCCCCCAGATTCAGATTACTGGTTCT
CAGCAGATTGGCTGAAAGAGGAGTTGGAGGAGGCTGGACGTTGTACCCTCCTATAAGAGA
TTTAATGGGACAACCGGGGATAAGAGTGGACTTGGCTATCTTTAGGTTACATATTGCCGG
AGCTTCTTCTATTGGGGGGTCAATTAACTTTCTCTGCACTATTATTAATTTGCGGACTCC
TGGAATAACATGGCAAGG--TTTGCCTCTATTTATTTGAAGAATTTTTTTTACTGCTATT
TTACTAGTTCTTTCCCTGCCAGTTTTTGCAGGAGGTATCACTATGCTTTTAACTGATCGG
AACTTCAATACTAGGTTTTTCACTCCAGGAGGGGGGGGAAATCCTGTTTTATTTGTCCAT
CTTTTT----------
>Acoela_Archaphanostoma_sp3_IDUJ11_331_COI
GAGTCTATATTTTATTTTCGGAGCTTGAGCTGGTCTTATTGGAACTTTGTTGAGAGTGTT
AATTCGGCAAGAACTTCGTAATCCAGGTTC------TGGACTTATTAGGGAAAAGAGATA
TAATGTTACTATTACCTCCCATGGATTAATTATAATTTTTTTTTTTGTTATGCCGGTTCT
GATAGGGGGATTTGGAAACTGACTCCTGCCTCTAATACTAGGCTGTGCTGACATGGCTTT
CCCCCGATTAAATAATTTTTCGTTTTGATTACTCCCCCCCAGCTTTAGATTATTGGTCCT
CAGCAGATTGGCGGAAAGAGGAGTTGGGGGAGGCTGGACGTTGTACCCCCCTATAAGAGA
TTTAATGGGACAACCGGGGATAAGAGTGGACTTGGCTATCTTTAGGTTACATATTGCCGG
AGCTTCTTCTATTGGAGGATCAATTAATTTTCTCTGTACTATTATTAACTTGCGGACTCC
TGGAATAACATGACAAGA--TTTACCCCTGTTTATTTGAAGAGTTTTTTTTACTGCTATT
TTACTAGTTCTTTCCCTACCAGTTTTTGCAGGAGGTATTACTATACTTTTAACTGATCGG
AACTTCAATACTAGGTTTTTCACTCCAGGAGGGGGGGGGGATCCTGTTTTATTTGTCCAT
CTTTTT----------
>Acoela_Haplogonaria_schillingi_IDMHRr_GBFR837859
-ACTTTGTATTTTATTTTCGGGGTTTGGGCTGGGATTATTGGAACTTTGTTAAGTTTAGT
TATTCGAAGAGAATTACGACATCCTAGATC------AGGACTAATTACTGAAAAAGCTTA
TAATGTTGCAATTACTGCCCATGGTTTAATTATAATTTTTTTTTTTGTTATGCCTGTTCT
TATAGGAGGATTCGGAAATTGATTAATGCCCCTTATATTAGGATGTGCAGATATGGCCTT
CCCTCGTTTAAATAATTTATCATTTTGACTTCTACCTCCTAGATTTACTTTATTAATTTT
AAGAAGATTAGCCGAATCTGGCGTCGGCAGAGGCTGGACTCTCTATCCTCCTATAAGGGA
TTTAATTGGGCAACCAGGATTGAGAGTAGATTTAGCTATTTTTAGATTGCATATTGCTGG
AGCTTCCTCTATTGGGGGATCTATTAATTTTCTTTGTACTATTATTAATTTGCGAAGAAT
GAGCATTTCTTGAGAAAA--TTTACCTCTTTTTATTTGAAGAATATTTTTTACCGCCATT
CTTCTTGTTCTTTCTTTGCCTGTTTTTGCAGGAGGGATCACAATACTTTTAACAGATCGA
AATTTTAATACTA-ATTTTTTAATCCTGCAGGTGGGGGAGATCCTATTCTTTTTGTGCA-
----------------
>Acoela_Microposthia_listensis_IDUJ11_333_COI
CTCTCTCTATTTTATTTTTGGTATTTGGGCCGGAATTATTGGTACCCTTTTGAGATTGGT
AATTCGAAGAGAATTACGCCATCCAAGTTC------AAGAATAATTTCAGAAAAAGCCTA
TAATGTTGCCATCACATCACATGGTCTTATTATAATTTTTTTTTTTGTGATACCTATCTT
GATGGGGGGCTTTGGAAATTGACTATTGCCTCTTATATTAGGATGTACAGATATAGCATT
TCCACGACTTAATAACTTTTCTTTTTGACTTCTCCCTCCAAGGTTCACTTTGTTGATTTT
GAGAAGATTATCAGAATCCGGAGTTGGGGGAGGCTGAACCCTCTACCCTCCTATAAGAGA
TCTAATCGGACAACCTGGAATAAGAGTTGACTTAGCCATTTTTAGACTCCATATTGCTGG
AGCTTCCTCTATTGGAGGATCAATCAATTTTCTTTGTACCATTATTAATTTACGTTCTCC
CAGTCTCTCGTGAGAGAGACACTTCCTCTTTTTATTTGAAGAATTTTTTTTACAGCAATT
CTTCTAGTTCTCTCTCTTCCTGTTTTTGCTGGTGGGATTACCATGCTGTTAACAGATCGT
AATTTTAATACAAGATTTTTTACCCCCTCGGGTGGGGGAGATCCTGTTCTCTTTGTCCAT
TTATTT----------
>Acoela_Pseudaphanostoma_smithrii_IDMHPs_GBFR837896
-ACTCTTTATTTTCTTTTTGGAGGTTGGGCGGGGCTTATCGGAACT-TATTAGATGTATT
AATTCGAAGAGAATTGGGGCAGCCAGGATC------AAGGGTTATTAGGGAAAAAAGATA
TAATGTAGCAATTACGGCCCATGGATTGATTATAATTTTTTTTTTTGTAATACCAGTTTT
AATGGGGGGCTTCGGAAATTGGTTGTTGCCCCTTATATTAGGCTGCACGGATATGGCCTT
CCCTCGGCTAAATAATTTTTCTTTTTGGTTGTTGCCCCCGAGATTTAGTTTATTGTTACT
AAGAAGACTTGCTGAAGCGGGGGTGGGGGGAGGTTGAACAATTTACCCCCCCATAAGAGA
TTTAATCGGACAGCCAGGAATAAGAGTAGATTTAGCTATTTTTAGACTTCATATCGCCGG
AGCTTCTTCTATTGGAGGCTCAATTAATTTTTTATGCACCATTATTAATCTTCGAAGGCG
TAGCATGTCTTGAGAGAA--TCTCCCTCTTTTTGTGTGAAGAGTTTTTTTCACAGCTATT
TTATTGGTTCTTTCTTTACCAGTATTCGCGGGGGGGATTACAATATTACTCACAAATCGG
AATTTTAATACAAGGTTTTTTAATCCCGCGGGAGGAGGAAACCCCGGGCTTTTTGTTCA-
----------------
>Acoela_Daku_woorimensis_IDMHDw_GBFR837854
-ACTTTATATTTTATTTTTGGAGTTGGATCAGGAATTTTAGGCGCTATAATAAGAATTTT
AATTCGAACTGAATTAAAAACAACTGGAAA------AAACATTATTTCAGAAAATGTTTA
TAATGTTTTAATTACAGCTCATGGTTTAATTATAATTTTTTTTTTTGTAATACCGGTATT
AATGGGAGGTTTTGGAAATTGGTTACTACCTTTAATATTAGGGTGTGCTGACATAGCATT
TCCTCGTTTAAATAATTTATCATTTTGATTACTACCTCCAAGATTAATACTTCTAATTTT
AAGAAGTTTAGTCGGTAGAGGTGTTGGATCTGGGTGAACTATTTATCCTCCAATAAGAGA
TCTGGTGGGACAACCTGAAATAAGGGTAGATTTTGCTATTTTTAGATTACATATTGCGGG
AGCTTCATCGATTGGTGGTTCTATTAATTTTCTATGTACTATTATTAATTTACGAAGACC
CCACATTTCTTGAGATCA--AATTCCTCTTTTTATCTGGAGAGTTTTTTTTACCGCGATT
CTTTTAGTTTTATCTTTACCAGTTTTAGCTGGGGGTATTACAATATTACTAACAGATCGT
AATTTTAATACTTCCTTTTTTGATCCTGCTGGAGGCGGTGATCCAGTTTTGTTTGTCCA-
----------------
>Acoela_Philactinoposthia_coneyi_IDMHSc_GBFR837880
-ACTTTGTATTTTTTTTTTGGTATTTTTTCAGGAAATATTGGTACTTTAATGAGAATTTT
AATTCGAACAGAATTGCGACAATCAGACAA------AAATATTTTAAGAGAAAATAGGTA
CAATGTTCTTATCACAGCTCATGGTTTAATTATAATTTTTTTTTTTGTAATGCCTGTTCT
TATGGGGGGATTCGGCAATTGGTTACTTCCTCTAATATTAGGTTGTGCCGATATGGCCTT
TCCACGTTTAAATAATTTCTCATTTTGATTATTACCTCCAAGATTAATACTTTTAGTTTT
AAGAAGTTTAAGAGAAATAGGAGTGGGAGCAGGATGAACAATTTATCCTCCTATAAGAGA
TCTAGTGGGTCAGCCAGGAATAAGAGTAGATTTAGCTATTTTTAGCTTACATATTGCAGG
AGCCTCCTCTATTGGAGGCTCTATTAATTTTTTATGTACTATTATTAATTTACGAAATCC
CTCAATTTCTTGAGATAA--ATTACCTTTATTTATTTGAAGAATTTTTTTTACTGCAATC
TTGTTAGTTCTATCTTTACCTGTATTTGCAGGAGGTATTACAATATTACTTACTGACCGA
AATTTTAATACTTC----------------------------------------------
----------------
>Acoela_Philactinoposthia_helgolandica_IDUJ10_222_COI
------------------------------------------CACTCTTATAAGCTTAAT
TATTCGGACTGAGTTAC-ATTTCCTGGTAA------CAATTTTGTTTCTGAGAACATTTA
CAATGTGTTAATTACAGCACACGGTTTAATTATAATTTTTTTTTTTGTAATACCTATTTT
AATAGGTGGTTTTGGAAACTGACTTTTACCTCTAATATTAGGATGTGCAGATATGGCTTT
TCCTCGATTAAATAATTTCTCATTTTGATTATTACCTCCGAGATTTATACTTTTAGTATT
AAGAAGAATAGTTGAAAGGGGGGTAGGAGCTGGTTGAACTATTTACCCACCGATAAGGGA
CTTAATTGGTCAACCTGGTATGAGAGTAGATTTTGCTATTTTCAGATTACATATTGCGGG
TATTTCCTCTATTGGAGGTGCAATTAATTTTTTATGTACAATTATTAATTTACGAAATCC
TTCTCTTTCTTGAGATAA--AATTTCCCTTTTTGTTTGAGCTATTTTTTTTACAGCCATT
CTTTTAGTTATTTCTTTACCTGTTTTTGCAGGAGGCATTACAATATTGCTAACTGATCGA
AATTTTAATACATCTTTTTTTGATCCCTCAGGAGGAGGTGATCCTATTTTATTT------
----------------
>Acoela_Philactinoposthia_sp10_IDUJ10_232_COI
------------------------------------------CACTCTTATAAGCTTAAT
TATTCGGACTGAGTTACGATTTCCTGGTAA------CAATTTTGTTTCTGAAAACATTTA
CAATGTGTTAATTACAGCACACGGTTTAATTATAATTTTTTTTTTTGTAATACCTATTTT
AATAGGTGGTTTTGGAAACTGACTTTTACCTCTAATATTAGGATGTGCAGATATGGCTTT
TCCTCGATTAAATAATTTCTCATTTTGATTACTACCTCCGAGATTTATACTTTTAGTATT
AAGAAGAATAGTTGAAAGGGGGGTAGGAGCTGGTTGAACTATTTACCCACCGATAAGGGA
CTTAATTGGTCAACCTGGTATGAGAGTAGATTTTGCTATTTTCAGATTACATATTGCGGG
TATTTCCTCTATTGGAGGCGCAATTAATTTTTTATGTACAATTATTAATTTACGAAATCC
TTCTCTTTCTTGAGATAA--AATTTCCCTTTTTGTTTGAGCTATTTTTTTTACAGCCATT
CTTTTAGTTATTTCTTTACCCGTTTTTGCAGGAGGCATTACAATATTACTAACTGATCGA
AATTTTAATACATCTTTTTTTGATCCCTCAGGAGGAGGAAATCCTATTTTATTTGTACAT
CTTTTT----------
>Acoela_Philactinoposthia_sp17_IDUJ14_101_COI
TACTTTGTATTTTATTTTAGGTATTTTTTGTGGAGTAATTGGCACTCTAATAAGCTTAAT
TATTCGGACTGAATTACGATTTCCTGGAAA------CAATTTTGTTTCTGAAAACATTTA
TAATGTATTAATTACAGCACACGGTTTAATCATAATTTTTTTCTTTGTAATACCTATTTT
AATAGGTGGTTTTGGAAACTGACTTTTACCTCTAATATTAGGATGTGCAGATATAGCTTT
TCCTCGATTAAATAATTTCTCATTTTGATTATTACCTCCGAGATTTATACTTTTGGTATT
AAGAAGAATAGTTGAAAGAGGGGTAGGAGCTGGTTGAACTATTTACCCACCGATAAGGGA
CTTGATTGGTCAACCTGGTATGAGAGTAGATTTTGCTATTTTTAGATTACATATTGCGGG
CATTTCCTCTATTGGAGGTGCAATTAATTTTTTATGTACAATTATTAATTTACGAAATCC
TTCTCTTTCTTGAGATAA--GATCTCCCTTTTTGTTTGAGCTATTTTTTTTACAGCCATC
CTTTTAGTTATTTCACTACCCGTTTTTGCGGGAGGTATTACAATATTGTTAACTGATCGA
AATTTCAATACATCTTTTTTTGATCCCTCAGGAGGAGGAGATCCTATTTTATTTGTGCAT
CTTTTT----------
>Acoela_Philactinoposthia_sp12_IDUJ10_152_COI
TACTTTATATTTTATTTTAGGAATTTTCTGTGGTGTAATTGGAACTTTAATGAGTTTAAT
TATTCGAACTGAATTACGCTTACCTGGTAA------TAATTTTATTTCTGAAAATATTTA
TAATGTATTAATTACTGCACATGGTCTAATTATAATTTTTTTTTTTGTAATGCCTATTTT
AATAGGAGGCTTTGGAAATTGACTTTTACCTCTTATATTAGGTTGTGCAGATATGGCATT
TCCTCGTTTAAATAATTTTTCATTTTGATTACTTCCACCAAGATTCCTCCTTTTAGTCTT
AAGAAGAATGGTGGAAAGGGGCGTAGGTGCTGGATGAACTATTTACCCCCCCATAAGAGA
TTTAATTGGACAGCCAGGAATAAGAGTTGATTTTGCAATTTTTAGATTACATATTGCTGG
TATTTCTTCAATTGGAGGGGCTATTAATTTCTTATGTACCATCATTAATTTACGTAATCC
TTCTCTTTCCTGAGATAA--AATTTCTTTATTTGTATGAGCTGTTTTCTTTACAGCCATT
CTTTTAGTAATTTCATTACCAGTATTTGCTGGAGGAATTACAATACTTTTAACAGATCGA
AATTTTAATACCTCTTTTTTTGATCCTTCAGGAGGAGGAGATCCTGTTTTATTTGTTCAT
TTGTTT----------
>Acoela_Philactinoposthia_sp7_IDUJ10_161_COI
TACTTTATATTTTATTTTAGGAATTTTCTGTGGTGTAATTGGAACTTTAATGAGTTTAAT
TATTCGAACTGAATTACGCTTACCTGGTAA------TAATTTTATTTCTGAAAATATTTA
TAATGTATTAATTACTGCACATGGTCTAATTATAATTTTTTTTTTTGTAATGCCTATTTT
AATAGGAGGCTTTGGAAATTGACTTTTACCTCTTATATTAGGTTGTGCCGATATGGCATT
TCCTCGTTTAAATAATTTTTCATTTTGATTACTTCCACCAAGATTCCTCCTTTTAGTCTT
AAGAAGAATGGTGGAAAGGGGCGTAGGTGCTGGATGAACTATTTACCCCCCCATAAGAGA
TTTAATTGGACAGCCAGGAATAAGAGTTGATTTTGCAATTTTTAGATTACATATTGCTGG
TATTTCTTCAATTGGAGGGGCTATTAATTTCTTATGTACCATCATTAATTTACGTAATCC
TTCTCTTTCCTGAGATAA--AATTTCTTTATTTGTATGAGCTGTTTTCTTTACAGCCATT
CTTTTAGTAATTTCATTACCAGTATTTGCTGGAGGAATTACAATACTTTTAACAGATCGA
AATTTTAATACCTCTTTTTTTGATCCTTCAGGAGGAGGAGATCCTGTTTTATTTGTTCAT
TTGTTT----------
>Acoela_Philactinoposthia_sp9_IDUJ10_085_3_COI
TACTTTATATTTTATTTTAGGAATTTTCTGTGGTGTAATTGGAACTTTAATGAGTTTAAT
TATTCGAACTGAATTACGCTTACCTGGTAA------TAATTTTATTTCTGAAAATATTTA
TAATGTATTAATTACTGCACATGGTCTAATTATAATTTTTTTTTTTGTAATGCCTATTTT
AATAGGAGGCTTTGGAAATTGACTTTTACCTCTTATATTAGGTTGTGCAGATATGGCATT
TCCTCGTTTAAATAATTTTTCATTTTGATTACTTCCACCAAGATTCCTCCTTTTAGTCTT
AAGAAGAATGGTGGAAAGGGGCGTAGGTGCTGGATGAACTATTTACCCCCCCATAAGAGA
TTTAATTGGACAGCCAGGAATAAGAGTTGATTTTGCAATTTTTAGATTACATATTGCTGG
TATTTCTTCAATTGGAGGGGCTATTAATTTCTTATGTACCATCATTAATTTACGTAATCC
TTCTCTTTCCTGAGATAA--AATTTCTTTATTTGTATGAGCTGTTTTCTTTACAGCCATT
CTTTTAGTAATTTCATTACCAGTATTTGCTGGAGGAATTACAATACTTTTAACAGATCGA
AATTTTAATACCTCTTTTTTTGATCCTTCAGGAGGAGGAGATCCTGTTTTATTTGTTCAC
CTTTTT----------
>Acoela_Philactinoposthia_sp6_IDUJ10_111_COI
AACTTTATATTTTATTTTGGGAATTTTTTGCGGTGTCATTGGAACTTTAATAAGATTAAT
TATTCGAACAGAATTACGATTTCCAGGAAA------CAATTTTGTTTCCGAAAATATCTA
CAATGTCTTAATTACTGCACACGGTTTAATTATAATTTTTTTTTTCGTAATACCAATTTT
AATAGGAGGATTTGGTAATTGACTTCTTCCTCTTATGTTGGGATGTGCAGATATAGCTTT
CCCTCGTCTAAATAATTTTTCCTTTTGACTTCTTCCTCCAAGATTTTTACTTCTTGTATT
AAGAAGAATAGTAGAAAGAGGAGTAGGTGCTGGATGAACTATCTATCCACCAATAAGAGA
TCTAATTGGACAACCAGGTATAAGAGTTGATTTTGCTATTTTCAGACTACATATTGCTGG
AATTTCCTCTATCGGAGGGGCAATTAATTTTCTATGTACTATTATTAATTTACGTAATCC
TTCTCTTTCTTGAGATAA--AATTTCTTTATTTGTTTGAGCAATTTTTTTTACTGCTATT
CTTTTAGTTATTTCCTTGCCAGTGTTTGCTGGAGGTATTACCATACTTTTAACTGATCGA
AATTTTAACACTTCTTTTTTTGATCCTTCTGGAGGGGGAGATCCAGTTTTATTTGTCCAC
CTTTTT----------
>Acoela_Philactinoposthia_sp20_IDUJ13_471_COI
-ACACTTTATTTCATTTTAGGAATTTTTTGTGGTGTAATTGGAACTTTAATAAGATTAAT
TATTCGCACTGAATTACGATTCCCAGGAAA------TAATCTTATTTCCGAAAATATTTA
TAATGTTTTAATTACTGCTCATGGTCTAATCATAATTTTCTTTTTTGTAATACCAATTTT
AATGGGGGGATTTGGAAATTGGCTTCTTCCCCTTATGTTAGGTTGTGCTGATATAGCCTT
CCCTCGATTAAATAATTTTTCATTTTGATTACTTCCTCCTAGTTTTTTACTTTTAGTATT
AAGAAGAATAATTGAAAGTGGTGTTGGAGCTGGATGAACTATTTACCCCCCTATAAGGGA
TTTAATTGGACAACCTGGGATAAGAGTAGATTTTGCTATCTTTAGATTACATATTGCTGG
AATTTCTTCCATTGGAGGAGCAATTAATTTTTTATGTACAATTATTAATTTACGTAATCC
TTCTCTTTCATGAGAAAA--AATTTCTTTATTTGTATGAGCAATTTTTTTCACAGCAATT
TTGTTAGTAATCTCATTACCGGTTTTTGCAGGAGGAATTACAATATTATTAACCGATCGA
AATTTTAATACTTCATTTTTTGATCCTTCTGGAGGAGGGGATCCTGTTTTATTTGTACAC
CTTTTT----------
>Acoela_Philactinoposthia_sp4_IDUJ08_119_COI
AACATTGTATTTTATTTTGGGAATCTTTTGTGGCGTTATTGGAACTTTAATAAGGTTAAT
CATTCGGACAGAATTACGCTTTCCAGGAAA------TAACTTTGTTTCAGAGAATATTTA
TAATGTATTAATTACAGCACACGGTTTAATTATAATTTTTTTTTTTGTAATACCTATTCT
AATGGGAGGATTTGGCAATTGACTTCTCCCCTTGATGTTGGGATGCGCCGACATGGCATT
TCCTCGATTGAACAATTTTTCGTTTTGATTACTTCCGCCTAGATTCCTACTCCTGGTCTT
AAGGAGAATAGTTGAAAGAGGAGTAGGGGCCGGATGGACTATTTACCCCCCCATAAGAGA
TCTAGTAGGTCAGCCGGGCATAAGTGTTGATTTTGCCATCTTCAGATTACACATTGCCGG
AATCTCCTCTATTGGAGGGGCTATTAATTTTTTATGCACCATTATTAATTTACGAAATCC
TTCTCTCTCTTGAGACAA--GATTTCTCTTTTTGTCTGAGCAATTTTTTTTACTGCAATT
CTTTTAGTAATCTCATTGCCAGTTTTTGCCGGCGGAATTACCATGCTTCTTACAGATCGA
AATTTTAATACTTCTTTCTTTGATCCTTCGGGAGGGGGAGATCCTGTTTTATTCGTACAT
CTTTTCT---------
>Acoela_Philactinoposthia_sp14_IDUJ11_179_COI
TACCTTATATTTTGTTTTTGGTATATTTTGCGGTGTAGTAGGTACACTAATAAGATTACT
AATTCGTACAGAATTACGATTGGGAAATAA------TAATATAATTAATGAAAATATTTA
TAATGTTTTAATTACAGCGCATGGTTTAATTATAATTTTTTTTTTTGTAATACCTATTTT
AATAGGAGGTTTTGGAAATTGACTTTTACCTCTCATATTAGGATGTGCGGACATAGCTTT
TCCCCGTTTAAATAATTTTTCTTTTTGATTACTTCCCCCCAGATTTATATTATTAATTTT
GAGAAGATTAACAGAAATAGGTGTAGGAGCTGGTTGAACTATCTATCCTCCTATGAGAGA
TTTAATTGGACAGCCGGGAGCCAGAGTAGATTTTGCTATTTTTAGCTTACATATTGCAGG
AGTTTCTTCCATTGGTGGAGCTATTAATTTTTTATGTACAATTATTAATTTACGAAATCC
TTCCCTTTCTTGGGATAA--AATTTCTTTATTTGTTTGAACAATTTTTTTTACAGCAATT
TTATTAATTATTTCTTTACCGGTTTTTGCCGGAGGTATTACAATACTATTAACTGATCGA
AATTTTAATACTTCCTTTTTTGATCCTTCGGGAGGAGGGGACCCAGTTCTTTTTGTTCAT
CTATTT----------
>Acoela_Philactinoposthia_sp11_IDUJ10_219_COI
AACTCTTTATTTTATTTTTGGAATATTTTGTGGTATTGTCGGAACTTTAATAAGTTTAAT
AATTCGAACTGAATTGCGGTGACCAAGAAA------TAATTTCGTAAGTGAAAATATTTA
TAATGTTCTTATTACAGCGCATGGTTTAATTATAATTTTTTTTTTTGTAATGCCTATTTT
AATAGGAGGTTTTGGAAATTGGCTTCTCCCGTTGATACTGGGTTGCGCTGATATGGCTTT
TCCTCGATTGAACAATCTTTCATTTTGACTATTACCTCCTAGTTTTTTATTATTAGTTCT
AAGAAGGATAGTAGAAAGCGGGGTCGGTGCCGGATGAACAATTTATCCTCCTATAAGAGA
TTTAATTGGCCAACCGGGAATAAGAGTAGATTTTGCTATTTTTAGTTTGCATATTGCCGG
TGTGTCTTCAATTGGTGGAGCCATCAATTTTTTATGTACAATTATTAATTTACGAAATCC
TGGTCTGCCCTGGGGGCA--AAATTCTCTTTTTATTTGAACTATTTTTTTTACAGCTATC
CTATTAGTTATTTCTTTACCAGTTTTTGCTGGGGGAATTACAATATTATTAACAGATCGA
AATTTTAATACTTCTTTTTTTGATCCCTCAGGGGGGGGAGATCCAATTTTATTTGTCCAC
CTTTTT----------
>Acoela_Philactinoposthia_sp17_IDUJ14_108_COI
AACTCTTTATTTTATTTTTGGCATATTTTGTGGTGTGGTGGGCACACTCATAAGATTACT
CATTCGAACTGAGTTACGATTGGCAGAACA------CAATATTTTGACAGAGAATATTTA
TAATGTTCTCATCACAGCTCACGGATTAATTATAATTTTTTTTTTTGTCATGCCAATTCT
AATAGGTGGTTTTGGTAATTGATTACTTCCTCTAATATTGGGATGTGCGGATATGGCCTT
TCCACGATTAAACAATCTCTCATTCTGACTTCTACCTCCCAGATTTTTTTTACTTATTCT
GAGGAGATTAATTGAAAGTGGGGTTGGGGCCGGCTGAACTATTTATCCCCCCATAAGAGA
TTTAGTGGGCCAACCAGGTATGAGAGTTGATTTCGCCATCTTTAGGTTACATGTAGCTGG
AGTTTCTTCTATCGGGGGGGCCATTAATTTTTTATGCACAATTATTAATCTTCGCAATCC
CTCCCTTTCTTGGGAAAA--ACTTTCCCTCTTTATTTGAACTATTTTTTTTACAGCTATT
CTTTTAGTAATTTCACTTCCTGTTTTTGCGGGAGGAATCACCATACTATTAACTGATCGA
AATTTCAATACATCTTTTTTCGATCCCACAGGAGGGGGAGATCCTATTTTGTTTGTACAT
CTTTTT----------
>Acoela_Philactinoposthia_sp5_IDUJ09_19_COI
GACTCTCTATTTTATTTTTGGAACATTTTGTGGGGTAGTGGGCACCTTGATAAGTCTGCT
GATCCGTACGGAATTACGATTGGAAGATCA------TAATATTTTCACAGAAAATACTTA
CAATGTTCTCATCACAGCACATGGATTAATTATAATTTTTTTTTTTGTCATGCCTATCTT
AATAGGGGGTTTCGGGAATTGATTGCTTCCTCTGATATTGGGTTGTGCTGATATGGCATT
TCCTCGACTAAATAATTTATCGTTTTGACTTCTTCCCCCTAGATTTTTCTTACTTTTATT
GAGAAGAATGGTGGAGAGAGGTGTGGGGGCGGGTTGAACAATTTATCCCCCCATAAGAGA
TTTAGTGGGGCAACCGGGCATAAGGGTAGATTTTGCTATTTTTAGCTTACATGTGGCCGG
TGTGTCCTCCATTGGGGGGGCCATTAATTTCTTGTGTACAATTATTAATCTTCGGAGTCC
TTCTTTGTCTTGGGACAA--GGTATCTCTCTTCATTTGAACCATCTTTTTTACAGCCATT
TTACTAGTAATTTCTTTGCCTGTCTTTGCGGGAGGCATCACCATACTTTTGACAGATCGG
AATTTTAACACATCGTTTTTCGACCCAGCCGGCGGAGGAAATCCAATTTTGTTTGTCCAC
TTATTT----------
>Acoela_Philactinoposthia_sp_IDUJ07_33_GBFR837884
-ACATTATATTTTATTTTTGGAATATTTTGTGGTGTAATCGGCACTTTGATGAGATTACT
AATTCGAACAGAATTACGATTTGCTGAGCA------CAATCTTTTAACAGAGAATATTTA
TAATGTGCTTATCACAGCTCACGGACTTATCATAATTTTTTTCTTTGTTATGCCCATTCT
TATGGGGGGTTTCGGAAATTGATTACTCCCCCTTATATTAGGTTGCGCTGACATAGCATT
TCCACGATTAAATAATTTTTCATTTTGATTACTCCCCCCCAGTTTTTTTTTGTTGATCTT
AAGAAGAATGGTGGAAAGAGGAGTTGGTGCGGGCTGAACTATCTACCCTCCTATGAGTGA
TTTAGTGGGACAGCCGGGCATGAGAGTAGATTTAGCTATTTTCAGTTTACATGTTGCCGG
AGTGTCCTCCATTGGAGGTGCTATTAATTTCTTATGCACAATTATTAATCTTCGGAGTCC
AGCTCTTTCGTGAGATAA--AATCTCTCTATTTATTTGAACCATTTTTTTTACAGCAATT
CTTTTAGTTATTTCCTTACCAGTGTTTGCAGGAGGTATCACAATACTTTTAACTGATCGT
AATTTCAACACTTCCTTCTTTGATCCCTCGGGTGGAGGGGATCCTGTTCTTTTTGTTCAC
TTATTT----------
>Acoela_Philactinoposthia_sp13_IDUJ11_001_COI
AACTCTTTATTTTATTTTTGGCATTTTTTCTGGTATTGTTGGAACTTTAATAAGTGTTGT
TATTCGAACTGAATTACGTTCACCAAGAAA------CAACATTATTAGAGAAAATATTTA
TAATGTTTTAATTACCGCACATGGTTTGATTATAATTTTTTTTTTTGTTATACCAATTTT
GATGGGGGGCTTTGGGAACTGATTGTTGCCACTTATGTTGGGTTGTGCAGACATGGCTTT
TCCACGATTAAATAATTTTTCTTTTTGACTGCTCCCTCCAAGTTTTTTACTGTTGGTCTT
AAGAAGACTTGTTGAAACAGGTGTTGGTGCAGGATGAACTATTTATCCTCCTATGAGAGA
TTTAGTGGGCCAACCGGGGATAAGCGTCGATTTGGCAATTTTTAGATTACACATTGCAGG
AGCTTCTTCCATTGGTGGTTCTATTAATTTCTTATGTACTATTATTAATCTTCGTAATCC
TTCTCTTTCTTGGGAAAG--AATTCCTTTGTTTATTTGGAGAATTTTTTTTACAGCCATT
CTACTAGTTTTATCTTTACCTGTCTTTGCGGGAGGAATCACAATATTGCTAACAGATCGC
AATTTTAATACTTCTTTTTTTGACCCCTCCGGAGGAGGGGACCCTGTTCTTTTTGTCCAT
TTATTT----------
>Acoela_Philactinoposthia_sp21_IDUJ14_060_COI
TACTTTATATATATTATTTGGAATTTTTTCTGGTGTAGTGGGTGCTATAATAAGAATTTT
AATTCGAACAGAATTGCGAAGAACAGGTAA------AAATATTTTAACTGATAATGCATA
CAATGTCTTAATTACAGCACATGGTTTAATTATAATTTTTTTTTTTGTCATACCAGTATT
AATAGGAGGTTTTGGTAACTGACTTTTACCGCTTATATTAGGTTGTGCAGATATGGCATT
TCCTCGACTAAATAATTTATCTTTCTGATTATTGCCTCCTAGATTTTTATTATTAATTAT
AAGAAGTTTGGCTGAAAGAGGTGTTGGTGCAGGATGAACAATTTATCCACCTATAAGGGA
TTTAGTGGGACAACCTGGTATAAGTGTTGATTTAGCAATTTTTAGATTACATGTAGCAGG
TGCTTCTTCTATTGGTGGCTCTATTAACTTTCTTTGTACAATTATTAATTTACGAAATCC
TTCTATTTCTTGAGAAAA--AATTCCTCTATTTATCTGAAGCATTTTTTTTACTGCAATT
TTATTAGTTTTATCTTTACCTGTATTTGCTGGAGGAATTACCATATTATTAACAGATCGA
AATTTTAATACGTCATTTTTTGATCCTTCTGGTGGAGGG---------------------
----------------
>Acoela_Philactinoposthia_sp21_IDUJ14_063_COI
TACTTTATATATATTATTTGGAATTTTTTCTGGTGTAGTGGGTGCTATAATAAGAATTTT
AATTCGAACAGAATTGCGAAGAACAGGTAA------AAATATTTTAACTGATAATGCATA
TAATGTCTTAATTACAGCACATGGTTTAATTATAATTTTTTTTTTTGTCATACCAGTATT
AATAGGAGGTTTTGGTAACTGACTTTTACCGCTTATATTAGGTTGTGCAGATATGGCATT
TCCTCGACTAAATAATTTATCTTTCTGATTATTGCCTCCTAGATTTTTATTATTAATTAT
AAGAAGTTTGGCTGAAAGAGGTGTTGGTGCAGGATGAACAATTTATCCACCTATAAGGGA
TTTAGTGGGACAACCTGGTATAAGTGTTGATTTAGCAATTTTTAGATTACATGTAGCAGG
TGCTTCTTCTATTGGTGGCTCTATTAACTTTCTTTGTACAATTATTAATTTACGAAATCC
TTCTATTTCTTGAGAAAA--AATTCCTCTATTTATCTGAAGCATTTTTTTTACTGCAATT
TTATTAGTTTTATCTTTACCTGTATTTGCTGGAGGAATTACCATATTATTAACAGATCGA
AATTTTAATACGTCATTTTTTGATCCTTCTGGTGGAGGGGATCCAGTTCTTTTTGTTCAT
TTATTT----------
>Acoela_Philactinoposthia_sp_2_IDUJ08_65_GBFR837882
-ACTTTATATTTTGTGTTTGGTATATTTTCTGGAATTATTGGAACAATTCTAAGATTATT
AATCCGAACAGAATTACGTTCACCAGATTA------TAATTTTATTAATGAAAATATTTA
TAATGTTATTATCACAGCACATGGATTAATCATAATCTTCTTCTTTGTTATACCTATCTT
AATAGGGGGATTTGGAAATTGACTTCTTCCTATTATACTAGGGTGTGCTGATATAGCATT
TCCACGTCTAAACAATCTTTCTTTTTGATTATTGCCTCCAAGGCTTATGCTTTTAATTTT
GAGGAGATTGTCTGAAATGGGAGTAGGAGCTGGCTGAACTATTTATCCCCCAATAAGAGA
TTTAGTGGGTCAACCCGGAATAAGTGTAGATTTAGCAATCTTTAGACTACACATTGCAGG
GGCCTCCTCTATTGGTGGAGCCATTAACTTTTTATGCACAATTATTAATTTACGAAATCC
TTCTTTATCATGGGACAA--ACTGCCTTTGTTTATCTGGGCAATTTTTTTTACAGCTATT
TTGCTTGTGATTTCATTACCCGTCTTTGCAGGAGGTATTACAATACTGCTAACTGATCGA
AATTTTAATACATCATTTTTTGACCCTTCAGGAGGAGGAGA-------------------
----------------
>Acoela_Haploposthia_rubropunctata_IDUJ13_503_COI
GACTTTATATTTTATCTTTGGAATTTGGGCAGCAATCATTGGGACTTTCATGAGAGTTTT
AATTCGAACCCAACTCCGATATCCAAGATC------TCAATTCTTAAGGGAATCAAGATA
TAACACATTAATTACAGCTCATGGTTTAATTATAATTTTCTTTTTTGTAATACCTGTTTT
AATAGGAGGGTTTGGAAATTGATTATTACCAATAATATTGGGCTGTGTTGATATAGCATT
TCCTCGGTTAAATAATTTATCTTTTTGATTATTACCTCCTAGATTTTCTTTATTACTTTT
AAGAAGAATAGTTGAAAGAGGAGTGGGATCAGGATGAACCATCTACCCACCTATAAGAGA
TTTGGTTGGCCAACCTGGAATAAGAGTGGATTTAGCAATTTTTAGATTACACATTGCCGG
AGCTTCTTCAATTGGTGGGTCAATTAATTTCTTGTGTACTATTATTAATTTACGATCTCC
TTCAATTTCTTGGGAAAA--AGTTCCTTTATTTATTTGAAGAGTGTTTTTTACGGCTATT
TTATTAGTATTATCTTTACCAGTGTTTGCTGGGGGAATTACAATACTATTAACTGATCGA
AATTTTAATACTAGATTCTTCGATCCTTCAGGAGGAGGTGACCCTGTTTTATTTGTTCAC
CTTTTT----------
>Acoela_Haploposthia_sp4_IDUJ13_447_COI
AACTCTTTATTTTATTTTTGGTACATGAGCAGCTGTAATTGGGGCTTTTATAAGAATTCT
TATCCGAACTGAACTTCGATTTCCAGGATT------TAATGTTTTAACAGAGCAGAGATA
TAATGTTCTCATTACTGCCCACGGGTTAATTATAATTTTTTTTTTTGTGATACCTGTTTT
AATGGGGGGATTTGGTAATTGACTTCTTCCATTGATACTAGGATGTGTGGATATGGCTTT
TCCTCGTTTAAACAATTTATCATTCTGGTTATTACCACCTAGTTTTAGTTTGTTGATTAT
TAGGAGTATGGTGGAATCGGGAGTAGGAGCAGGTTGAACTATTTATCCACCAATAAGAGA
TTTATTGGGACAGCCCGGAATGAGAGTAGATTTTGCCATTTTTAGATTACATATTGCCGG
AGTTTCTTCTATTGGTGGATCCATTAATTTTTTATGTACAATTATTAATTTACGAAGACC
CTCTATTACATGAGAGAA--ACTCCCTCTTTTTATTTGGAGAGTTTTTTTTACAGCTATT
TTATTAGTTTTATCTTTACCTGTCTTTGCAGGAGGTATTACAATGTTATTAACAGATCGA
AATTTTAATACCTCATTTTTTGATCCTTCGGGGGGTGGTGACCCTGTTCTTTTTGTTCAC
CTTTTT----------
>Acoela_Kuma_viridis_IDUJ03_34_GBFR837873
-GCTTTATATTTTATTTTTGGGATATGAGCAGGAGTTGTGGGGGCTTTTATGAGAATTCT
TATCCGAACTGAATTGCGATCTCCGGGGGG------GGGGCTTCTTAGGGAAAGGAGATA
TAATGTTTTAATTACTGCTCATGGTTTAATTATAATTTTTTTTTTTGTGATGCCTGTTTT
AATGGGAGGATTTGGTAATTGATTATTACCTCTTATGTTAGGGTGTGTGGATATAGCTTT
TCCTCGTTTAAATAATCTATCTTTCTGACTTCTTCCTCCTAGGTTTAGTTTACTAATTCT
TAGGAGATTAGTAGAATCAGGAGTTGGAGCTGGATGAACAATCTATCCTCCTATAAGTGA
TTTAATTGGACAGCCTGGTATAAGAGTAGATTTGGCAATTTTTAGTTTACATATTGCCGG
AGCCTCATCAATTGGTGGATCAATTAATTTCCTTTGTACAATTATCAATTTACGGAGTCC
CTCAATATCATGAGAAAA--AGTTCCCTTATTTGTTTGGAGGGTGTTTTTTACAGCAATT
TTATTAGTACTTTCCTTGCCGGTTTTTGCAGGGGGAATTACCATACTTCTCACCGATCGA
AATTTTAATACATCATTTTTTGATCCTTCAGGGGGAGGAGATCCGGTT-TATTTGTCCAT
TTGTTT----------
>Acoela_Parahaploposthia_cerebroepitheliata_IDUJ11_155_COI
AACTCTATATTTCATTTTTGGTATATGAGCTGGGGTTCTGGGAGCTTTTATAAGAATCCT
CATTCGAACAGAACTGCGTTATCCGGGGAG------GGGGATTCTTAGGGAAAGAAGATA
CAATGTGTTGATTACAGCTCATGGATTAATCATAATCTTCTTTTTTGTAATGCCAGTTCT
TATGGGAGGATTTGGAAATTGATTACTCCCACTAATATTGGGGTGTGTGGATATGGCTTT
CCCACGCCTCAATAATCTCTCCTTTTGATTACTCCCACCCAGATTCAGACTACTCATCCT
GAGTAGAATGGTGGAATCGGGAGTGGGATCAGGATGGACAATCTACCCCCCCATGAGTGA
CCTGATTGGGCAACCGGGGATAAGTGTGGATTTGGCCATCTTCAGTCTCCATATCGCCGG
CGCCTCCTCTATTGGGGGAAGGATTAATTTTTTATGTACCATTATTAATCTACGAAGTCC
CTCTCTCTCTTGAGAGAA--AATCCCACTGTTTATTTGAAGGGTTTTTTTCACGGCTATT
CTACTGGTTCTCTCTCTGCCGGTCTTTGCTGGGGGAATTACTATACTACTAACTGATCGA
AATTTTAACACATCCTTCTTTGATCCCGCTGGGGGAGGAGATCCAGTTTTGTTTGTTCAC
TTATTT----------
>Acoela_Paraproporus_sp1_IDUJ13_472_COI
AATATTATATTTTATTTTTGGTATATGAGCTTGGATTATTGGAGCCTTTTTAAGACTTTT
AATTCGAACAGAACTACGATTTTCTGGACA------AACTTTAGTTACAGAAAGAGTATA
TAATGTTTTAATTACAGCTCATGGTTTAATTATAATTTTTTTTTTTGTTATACCTGTATT
AATAGGAGGATTTGGTAATCTTCTTTTACCTTTAATATTAGGTTGTATTGATATAGCATT
TCCTCGTCTTAATAATTTATCATTTTGATTAGTTCCACCAAGATTTTCTTTATTAATTTT
AAGAAGATTAATAGAAAGAGGAGTTGGAGCAGGATGAACAATTTATCCTCCATTAAGAGA
TTTATTAGGACAACCAGGAATAAGAGTAGATCTAGCAATTTTTAGTTTACATATTGCTGG
AGTTTCCTCTATTGGAGGTTCAATTAATTTTTTATGTACTATTATTAATCTTCGTGGTAT
TTCAGTTAATTGAGAACA--TTTACCTTTATTTATTTGAGGAATTTTTTTTACAGCTATT
TTATTAGTCTTAGCTTTACCAGTTTTTGCGGGAGGAATTACAATATTATTAACTGATCGA
AATTTTAATACTTCATTTTTTGATCCTACAGGAGGAGGAGATCCAATTTTATTTGTACAC
CTTTTT----------
>Acoela_Paraproporus_sp1_IDUJ13_476_COI
AATATTATATTTTATTTTTGGTATGTGAGCCGGAATTATTGGAGCTTTTTTAAGACTTTT
AATTCGAACAGAATTACGATTTTCTGGACA------AACTTTAGTTACAGAAAGAGTATA
TAATGTTTTAATCACAGCTCATGGTTTAATTATAATTTTTTTTTTTGTTATACCTGTATT
AATAGGAGGATTTGGTAATTTTCTTTTACCTTTAATATTAGGTTGTATTGATATAGCATT
CCCTCGTCTTAATAATTTATCATTTTGATTAGTTCCACCAAGATTTTCTTTATTAATTTT
AAGAAGATTAATGGAAAGAGGAGTTGGAGCTGGATGAACAATTTATCCTCCATTAAGAGA
TTTATTGGGACAACCAGGAATAAGAGTAGATTTAGCAATTTTTAGTTTACATATTGCTGG
AGTTTCTTCTATTGGAGGTTCAATTAATTTTTTATGTACCATTATTAATCTTCGTAGTAT
CTCAGTTAATTGGGAACA--TTTACCTTTATTTATTTGAGGAGTTTTTTTTACAGCTATT
TTATTAGTTTTAGCTTTGCCAGTTTTTGCTGGAGGAATTACAATGTTATTAACTGATCGA
AATTTTAATACTTCATTTTTTGATCCTACAGGAGGAGGAGATCCAATTTTATTCGTACAC
CTTTTT----------
>Acoela_Polycanthus_sp_2_IDUJ08_17_GBFR837888
-ATACTTTATTTTTTATTTGGGACATGAGCTGGAATTATAGGGGCATTTATAAGATTATT
AATTCGTACAGAATTACGATTTCCTGGCGA------AAGTTTTCTTAGAGAAAGAGTCTA
TAATGTTCTTATCACAGCTCATGGACTAATTATAATTTTTTTTTTTGTTATACCTGTTCT
TATAGGAGGATTTGGAAATTTATTACTTCCTTTAATATTAGGTTGTGGAGATATAGCATT
TCCACGATTAAATAATCTCTCATTTTGATTCCTTCCCCCAAGATTTTCTTTACTTTTATT
AAGTAGATTAGTAGAAAGAGGGGTTGGATCAGGATGAACAATTTATCCTCCAATAAGGGA
TTTGATTGGTCAACCTGGGATAAGTGTGGATCTAGCAATTTTTAGATTACATATTGCTGG
AGCTTCCTCTATTGGGGGAGCAATTAATTTTTTATGCACGATTATTAATTTTCGTGGTAT
TTCTGTTAATTGAGAACA--ACTTCCTCTTCTTATTTGAAGAATTTTTTTTACAGCTATC
TTGTTAGTTTTAGCTTTACCAGTTTTTGCAGGAGGTATTACTATACTTTTAACAGATCGA
AATTTTAATACTTCCTTTTTTGATCCCACTGGGGGAGGGGATC-----------------
----------------
>Acoela_Polycanthus_sp_IDUJ08_33_GBFR837889
-------------------GGAACATGAGCTGGAATTATAGGAGCATTTATAAGATTATT
AATTCGTACAGAATTACGATTTCCTGGGAG------AAGTTTTCTTAGAGAAAGAGTATA
TAATGTTCTTATTACAGCTCATGGATTAATTATAATTTTTTTTTTTGTTATACCCGTTCT
TATAGGAGGATTTGGAAATTTATTACTTCCTTTAATATTAGGTTGTGGAGATATGGCATT
TCCACGATTAAATAATCTTTCGTTTTGATTTCTCCCACCAAGATTTTCCTTACTTTTATT
AAGTAGATTAGTGGAAAGAGGAGTAGGGGCAGGATG------------------------
------------------------------------------------------------
------------------------------------------------------------
------------------------------------------------------------
------------------------------------------------------------
------------------------------------------------------------
----------------
>Acoela_Philactinoposthia_saliens_IDUJ07_60_GBFR837881
----CTTTATTTTCTATTTGGTATAGGAGCAGGTATTGTAGGAGGAATAATGAGGGTAAT
TATTCGATTTGAATTACGAACGCCTGGTAG------GACAATTGTATCTGAAAACAGATA
TAACGTCCTAATCACGGCCCACGGTTTAATTATAATTTTTTTTTTTGTTATGCCCATTCT
TTTAGGGGGTTTCGGTAATTGATTAATCCCTTTGATAATGGGATGTGCGGATATAGCATT
TCCTCGACTAAATAATTTGTCTTTTTGACTTTTACCTCCTAGATTCTTCTTACTAATTTT
AAGAAGATTAGTAGAAATAGGTGTAGGAGCTGGTTGAACAATCTATCCTCCCATAAGAGA
TTTGGTAGGACAACCAGGTATGAGAGTTGATTTAGCTATTTTTAGGTTACATATTGCAGG
TGCTTCCTCTATTGGAGGAAGGATTAACTTTCTTTGCACAATAATTAATTTACGAAATCC
TAGAATATCATGAGAAAA--AATTCCTTTATTTATTTGAAGAATTTTTTTTACTGCTATT
TTACTAGTTCTTTCGTTACCCGTATTTGCCGGTGGCATTACAATACTTTTAACTGATCGT
AACTTTAACACATCTTTTTTTGATCCTGCAGGAGGAGGAGATC-----------------
----------------
>Acoela_Philactinoposthia_saliens_IDUJ13_254_COI
-----------------------------CAGGTATTGTAGGAGGAATAATGAGGGTAAT
TATTCGATCTGAATTACGAACGCCTGGTAG------GACAATTGTATCTGAAAACAGATA
TAACGTCCTAATCACGGCCCACGGGTTAATTATAATTTTTTTTTTTGTTATGCCCATTCT
TTTAGGGGGTTTTGGTAATTGATTAATCCCTTTGATAATGGGATGTGCGGATATAGCATT
TCCTCGACTAAATAATTTGTCTTTTTGACTTTTACCTCCGAAATTCTTCTTACTAATTTT
AAAAAAATTAGTAAAAATAGGTGTAGGAGCTGGTTGAACAATCTATCCTCCCATAAAAAA
TTTGGTAGGACAACCAGGTATGAAAGTTGATTTAGCTATTTTTAGGTTACATATTGCAGG
TGCTTCCTCTATTGGAGGAAGGATTAATTTTCTTTGCACAATAATTAATTTACGAAATCC
TAGAATATCATGAGAAAA--AATTCCCTTATTTATTTGAAGAATTTTTTTTACTGCTATT
TTACTAGTTCTTTCGTTACCCGTATTTGCCGGTGGCATTACAATACTTTTAACTGATCGT
AACTTTAACACATCTTTTTTTGATCCTGCAGGAGGAGGAAATCCCATTTTATTTGTTCAT
CTTTTT----------
>Acoela_Philactinoposthia_sp_3_IDAWHel_35_GBFR837883
----CTATATTTTTTATTTGGTATTATGTCCGGCATTATTGGGGGGATAATAAGAGTTAT
CATTCGAAGAGAATTACGATCTCCAGGTAG------AACTTTAGTTTCTGAAAATACTTA
TAATGTATTAATTACTGCTCATGGATTAATTATAATTTTTTTTTTTGTAATGCCAGTTTT
ACTTGGAGGTTTTGGTAATTGATTAATTCCTCTTATAATGGGATGTGCCGATATGGCGTT
TCCTCGTTTAAATAATTTATCTTTTTGGTTACTCCCCCCTAGATTTTTTCTTTTGATTTT
AAGAAGATTAGTAGAAATGGGGGTGGGGTCAGGATGAACAATCTACCCCCCAATAAGAGA
TTTGGTCGGACAGCCGGGAATAAGAGTAGATTTAGCTATTTTTAGACTTCATGTAGCTGG
AGCTTCTTCTATTGGAGGATCTATTAATTTTCTTTGTACTATAATCAATTTACGAAATCC
CAGAATATCATGGGAAAA--AATTCCTCTTTTCATTTGAAGAATTTTTTTTACAGCTATT
TTATTAGTTTTATCTTTGCCGGTTTTTGCTGGAGGCATTACCATATTATTAACAGATCGA
AATTTTAATACATCCTTTTTTGATCCTTCTGGTGGGGGAGACCCCATTTTGTTTGTCCA-
----------------
>Acoela_Philocelis_brueggemanni_IDMHPhB_GBFR837885
----TCCCTTCTTTTTCTTTGGATTTTTGCGGGTATTATTGGGGGGGTAATAAGAGTTTT
AATTCGAACAGAATTGCGACAACCCTCACT------TACATTATTTTCAGAAAATTCATA
CAATGTCTTAATTACGGCTCATGGTTTAATCATAATTTTTTTTTTTGTAATGCCTGTTTT
ATTGGGAGGTTTTGGAAATTGATTAATTCCTCTAATATTGGGATGTGCAGACATGGCTTT
TCCCCGATTGAATAATTTATCTTTTTGATTATTACCCCCAAGATTCTTCCTATTAGTAAT
AAAAAGATTGTCAGAAATGGGGGTGGGTTCGGGATGAACTATTTACCCCCCCATAAGAGA
CTTGGTGGGGCAACCTGGAATAAGAGTCGATTTAGCCATTTTTAGATTGCATATTGCTGG
AGCTTCTTCTATTGGGGGGTCTATTAATTTTTTATGTACTATAATTAACTTACGAAACCC
CTCGATAACATGAGATAA--AATCCCTCTTTTTATTTGAAGAATTTTTTTTACAGCCATC
TTATTAGTTTTGTCATTGCCGGTATTTGCGGGAGGAATTACTATGCTTTTAACAGATCGA
AATTTTAATACATCATTTTTTGATCCCTCGGGAGGGGGGGATCCCATTCTTTTCGTACA-
----------------
>Acoela_Praeaphanostoma_longum_IDUJ11_145_COI
AACTTTATATTTTATTTTTGGAACATGATCAGGAATTATTGGTACTCTTTTAAGTTTAAT
TATTCGAAGAGAACTTCGAAACCCCATGTC------CGGTATAATTTCAGAAAAAAGATA
TAATGTAGCTATTACTAGACATGGATTAATTATAATTTTTTTTTTTGTTATACCAGTTTT
AATGGGAGGTTTTGGCAATTGATTACTACCTCTAATATTAGGATGTGCCGATATGGCCTT
CCCACGTTTAAATAATTTTTCTTTCTGATTATTGCCACCGAGCTTAACACTTTTAGTCAT
AAGAAGTTTGACAGAATCTGGTGTTGGCGGAGGTTGAACATTATATCCTCCCATGAGAGA
TTTAATTGGTCAACCGGGAATAAGTGTTGATCTAGCAATTTTTAGATTACATATTGCCGG
AGCATCTTCCATTGGTGGGTCAATTAATTTCTTATGCACAATTATTAATCTCCGAGGAGT
GGGAATTTATTGAAGGAA--TATTTCTCTTTTTGTTTGAAGAGTTTTCTTCACAGCTATT
CTTTTAGTTCTTTCCCTCCCAGTCTTTGCTGGGGGAATTACAATACTTCTAACAGATCGA
AATTTTAATACAAGTTTTTTTAATCCAGCGGGAGGGGGTGATCCAATTTTATTTGTTCAC
TTATTT----------
>Acoela_Pseudaphanostoma_sp5_IDUJ11_075_COI
AACTTTATATTTTATTTTTGGAACATGATCAGGAATTATTGGTACTCTTTTAAGTTTAAT
TATTCGAAGAGAACTTCGAAACCCCATGTC------CGGTATAATTTCAGAAAAAAGATA
TAATGTAGCTATTACTAGACATGGATTAATTATAATTTTTTTTTTTGTTATACCAGTTTT
AATGGGAGGTTTTGGCAATTGATTACTACCTCTAATATTAGGATGTGCCGATATGGCCTT
CCCACGTTTAAATAATTTTTCTTTCTGATTATTGCCACCGAGCTTAACACTTTTAGTCAT
AAGAAGTTTGACAGAATCTGGTGTTGGCGGAGGTTGAACATTATATCCTCCCATGAGAGA
TTTAATTGGTCAACCGGGAATAAGTGTTGATCTAGCAATTTTTAGATTACATATTGCCGG
AGCATCTTCCATTGGTGGGTCAATTAATTTCTTATGCACAATTATTAATCTCCGAGGAGT
GGGAATTTATTGAAGGAA--TATTTCTCTTTTTGTTTGAAGAGTTTTCTTCACAGCTATT
CTTTTAGTTCTTTCCCTCCCAGTCTTTGCTGGGGGAATTACAATACTTCTAACAGATCGA
AATTTTAATACAAGTTTTTTTAATCCAGCGGGAGGGGGTGATCCAATTTTATTTGTTCAC
TTATTT----------
>Acoela_Philactinoposthia_sp3_IDUJ10_62_COI
TACACTATATTTTGGTTTTGGTTTACTTGCAGGTGTTGTAGGTACTATGCTGAGACTTAT
AATTCGAACAGAATTACGATTTCCAAATCA------AAATGTGATTAATGAAAATATTTA
CAATGTGATCATTACAGCACATGCGTTAATTATAATTTTCTTCTTTGTAATACCAGTTTT
GATAGGAGGATTCGGAAATTGATTACTACCTTTGATACTGGGATGTGCTGATATGGCGTT
CCCTCGATTAAATAATTTATCTTTCTGATTCCTACCCCCTAGATTTTTATTATTGGTACT
TAGAAGATTATCAGAAATAGGTGTTGGCTCTGGATGAACTATCTACCCTCCCATGAGAGA
TCTTGTAGGTCAACCAGGAATGAGTGTGGATTTGGCAATTTTCAGACTACATATTGCTGG
AGCTTCCTCAATTGGTAGCTCAATTAATTTCCTATGTACGATTATTAATCTTCGAAATCC
ATCATTATCATGAGACAA--ACTCCCACTTTTTATTTGAGCAATTTTTTTCACTTCTATT
CTTTTAGTAATTTCCTTACCTGTATTTGCAGGGGGTATCACCATGCTATTAACAGATCGT
AATTTTAATACTTCATTCTTCGATCCATCAGGAGGAGGGGATCCTATCCTATTTGTTCAT
TTATTTT---------
>Acoela_Haploposthia_lactomaculata_IDUJ03_32_GBFR837861
-ACTTTATATTTTATTTTTGGAATTTGAGGTGGTTTAATTGGAAGATTTATAAGATTAAT
TATTCGAACACAACTTCGTTTCCCCGAGGG------GGATTTAATTAGAGAAAATAATTA
TAATGTTATAATTACAGCACATGGTTTAATTATAATTTTTTTTTTTGTAATACCAATTTT
AATTGGTGGGTTTGGAAATTGGTTATTACCTTTAATATTAGGTTGTGTTGATATGGCATT
TCCTCGTTTAAATAATCTATCTTTTTGATTATTATTACCAAGATTTTCTCTTCTTTTAAT
TAGTAGACTTGCAGAAAGAGGAGTTGGTGGAGGTTGAACTATTTACCCTCCTTTAAGAGA
TATTTTAGGTCAACCTGGAATAAGAGTAGATTTAGCTATTTTTAGATTACATATTGCCGG
AGCTTCTTCTATTGGTGGCTCAATTAATTTTTTGTGCACAATTATTAATCTACGAAATCA
AAATTTAAAATGAGATAA--TTTACCACTTTTTATTTGAGCTACTTTTTTTACTGCTATT
TTATTAGTTATTTCTTTACCTGTTTTTGCTGGAGGTATTACAATATTATTAACTGATCGT
AATTTCAATACTTCTTTTTTTGATCCAAATGGAGGTGGAGATCCTATTTTATTTGTTCAT
TTATTT----------
>Acoela_Kuma_sp4_IDUJ12_021_COI
-GACCTATATTTCAT-TTGGGGATTTGGTCGGGTATTTTCGGGGGTATTCTTAGGTTATT
TATCCGAAGAGAATTACGACATCCTGGAAC------CAGTCTTATTGGGGAAAGAGTTTA
TAATGTTTTCATCACAGCTCATGGATTGATTATAATTTTTTTCTTCGTAATACCTGTGTT
AATGGGGGGATTTGGAAATTGATTATTACCATTAATATTAGGATGTCCGGATATAGCCTT
CCCCCGATTAAATAATCTCTCTTTTTGACTTCTCCCCCCTAGATTTAGGTTACTCATTTT
AAGAAGTTTGGCAGAAAGTGGGGTGGGGGCAGGATGAACAATCTACCCCCCTTTAAGAGA
CCTTGTTGGCCAGCCTGGTATAAGAGTTGATTTAGCTATTTTTAGTCTTCATATTGCCGG
GGCTTCTTCTATCGGGGGGTCAATTAATTTTTTATGCACCATCATTAATTGCCGAAACCC
CTCCATCACATGGGAACA--ACTACCGTTATTTATTTGAAGCGTATTTTTTACTGCTATT
CTTTTAGTGTTAGCTCTTCCTGTTTTTGCTGGAGGTATTACGATATTATTGACTGATCGA
AATTTTAATACTTCCTTTTTTGACCCCACAGGGGGGGGGGATCCCATTCTTTTTGTTCAC
TTATTT----------
>Acoela_Kuma_sp4_IDUJ12_025_COI
GACACTATATTTCATGTTGGGGATTTGGTCGGGTATTTTCGGGGGTATTCTAAGGTTATT
TATCCGAAGAGAATTACGACATCCTGGAAC------CAGTCTTATTGGGGAAAGAGTTTA
TAATGTTTTCATCACAGCTCATGGATTGATTATAATTTTTTTCTTCGTAATACCTGTGTT
AATGGGGGGATTTGGAAATTGATTATTACCATTAATATTAGGATGTCCGGATATAGCCTT
CCCCCGATTAAATAATTTCTCTTTTTGACTTCTCCCCCCCAGATTTAGGTTACTCATTTT
AAGAAGTTTGGCAGAAAGTGGGGTGGGGGCAGGATGAACAATCTACCCCCCTTTAAGAGA
CCTTGTTGGCCAGCCTGGTATAAGAGTTGATTTAGCTATTTTTAGTCTTCATATTGCCGG
GGCTTCTTCTATCGGGGGGTCAATTAATTTTTTATGCACCATCATTAATTGCCGAAACCC
CTCCATCACATGGGAACA--ACTACCTTTATTTATTTGAAGCGTATTTTTTACTGCTATT
CTTTTAGTGTTAGCTCTTCCTGTTTTTGCTGGAGGTATTACGATATTATTGACTGATCGA
AATTTTAATACTTCCTTTTTTGACCCCACAGGGGGTGGGGATCCCATTCTTTTTGTTCAC
TTATTT----------
>Acoela_Paraproporus_sp2_IDUJ13_475_COI
AACTCTTTATTTTTTGTTTGGAGTGTGGGCAGGAGTAATTGGAACTTTTCTAAGACTTGT
AATTCGAAGGGAGCTTCGGAACCCGGGCTC------TTCTTTGATTTCCGAGAAAGCCTA
TAATGTTTCTATTACAGCACATGGTTTAATTATAATTTTCTTTTTTGTAATGCCAGTTCT
AATGGGGGGGTTTGGAAATTGGTTACTTCCCCTCATACTAGGCTGTGCGGATATAGCTTT
CCCCCGCCTCAACAATTTCTCATTTTGACTTCTCCCTCCAAGATTTACCCTCCTTATTCT
TAGCAGATTAGCAGAGGCGGGGGTGGGGGCGGGATGAACTATTTACCCCCCCATAAGTGA
TCTTATTGGGCAGCCTGGGATAAGAGTAGATTTAGCTATTTTTAGCCTCCACATTGCGGG
AGCCTCCTCTATTGGGGGCTCCATTAATTTTTTGTGTACCATTATTAATTTACGAAGTGT
AGGCATCACGTGGGAAGG--CCTTCCTTTATTTATTTGGACAGTGTTTTTTACCGCCATT
CTCCTAGTCCTCTCCCTCCCTGTTTTTGCCGGGGGGATTACAATACTTTTAACAGATCGA
AATTTTAATACAAGGTTTTTTAATCCTGCCGGAGGAGGAGATCCGGTATTGTTTGTTCAC
CTTTTT----------
>Acoela_Haploposthia_rubra_IDUJ03_16_GBFR837862
-ACCTTATATTTTATTTTTGGCACTTGGGCTGGTTTAGTTGGGGGATTAATGTCCGTATT
AATTCGAACAGAACTACGTCACCCAGGAAT------TTCACTGGTGACTGAGTCAAGATA
TAATGTATTAATTACTGCCCATGGATTAATTATAATTTTTTTCTTTGTGATACCAGTATT
AATGGGGGGGTTTGGAAATTGGCTTATCCCAATAATAATAAATTGTGCGGATATGGCCTT
TCCCCGACTAAATAACCTATCATTTTGATTACTTCCTCCAAGATTTATATTATTAATTAT
GAGAAGTCTAGTTGAAAGAGGTGTGGGAGCTGGATGAACTATTTATCCCCCAATAAGGGA
TCTAATCGGCCAGCCTGGAATGAGTGTGGATTTAGCAATTTTTAGCTTGCATATCGCAGG
GGCTTCCTCTATTGGAGGTTCAATTAATTTCTTGTGCACCATTACCAATTTACGAAGTCC
TGCAATGTCTTGAGATCA--AATTCCTCTCTTCATTTGAGCTGTATTTTTTACAGCTATT
CTACTTGTTTTATCTCTACCAGTTTTTGCGGGAGGTATTACCATATTATTGACTGATCGA
AATTTTAATACTGCTTTTTTTGATCCTTCTGGAGGGGGAGACCCAGTGCTGTTTGTTCAC
TTATTT----------
>Acoela_Kuma_albiventer_IDAWBer_34_GBFR837872
-------TATTTTATTTTTGGAATCGGGAGTGGGATTATTGGTGGAATAATTAGTGTTAT
TATTCGAAGAGAGTTACGTCATCCAAGAGT------AAGACTTATTAGAGAAAATACTTA
TAATGTATTTATCACAGCACACGGATTAATTATAATTTTTTTTTTTGTAATACCGGTTTT
AATAGGTGGATTTGGGAATTGATTAATTCCTCTTATACTAGGCTGCCCAGATATAGCTTT
TCCCCGTTTAAATAATTTATCATTTTGATTATTGCCACCTAGTTTTAGATTACTTCTTTT
AAGGAGACTAACCGAAAGAGGAGTCGGAACGGGGTGAACCATTTATCCGCCTTTAAGAAA
TTGAATTGGACAACCTGGGATAAGCATGGACTTAGCTATTTTTAGTTTACATATTGCAGG
AGTATCCTCTATTGGAGGTTCAATTAATTTTTTATGTACCACTATTAATCTTCGTAATCC
AGATATAGGGTGAGAAAA--ATTACCTCTGTTTATTTGAAGGATATTTTTTACAGCTGTG
TTATTAGTATTAGCTTTACCTGTTTTAGCAGGTGGTATTACTATACTTTTAACCGATCGT
AATTTTAATACTTCCTTTTTTGATCCAACAGGGGGGGGAGACCCAATTTTATTTGTTCAC
TTGTTT----------
>Acoela_Childia_gracilis_IDUJ11_074_COI
CACTCTTTACTTCTTATTCGGGATAGGCGCTGGACTCCTTGGGACCACTATAAGACTAGC
AATCCGAAGAGAGTTACGGAGAGGGGGGGGCTCTCTGTCTTTCTTATCGGAGAGAACTTA
TAATGTCATCATCACCGCTCATGGATTAATTATAATTTTCTTCTTCGTGATACCAGTCTT
AATGGGAGGATTCAGAAACTGGCTACTACCATTGATGTTAGGTTGTGCGGATATAGCATT
TCCCCGCCTGAATAATCTTTCCTTTTGGCTTCTGCCACCTAGTCTATGCTTACTCTTACT
CAGAAGACTCATAGAGGCCGGGGTAGGCGCTGGGTGAACCATCTACCCCCCCATGAGGAG
CCTGATGGGACAACCTGGAGGAAGGGTGGATTTAGCCATCTTTAGATTGCACGTGGCGGG
AGTCTCCTCTATCGGAAGATCTATTAATTTTCTTTGTACTATTATTAACCTTCGAGCCTT
CCTATTAGATTGAGAGAT--AATTCCCCTGTTTGTGTGAACGGTTTTTTTTACCGCCATC
TTACTAGTGTTATCCCTTCCTGTCTTTGCTGGAGGGATCACCATACTGCTGACAGATCGG
AATCTGAACACCTCTTTTTTCGATCCAGCTGGGGGGGGGGATCCAGTTTTATTTGTTCAT
TTGTTT----------
>Acoela_Childia_gracilis_IDUJ11_169_COI
CACTCTTTACTTT-TATTTGGGATAGGGGCTGGACTCCTTGGGACCATTATAAGACTAGC
AATCCGAAGAGAGTTACGGAGAGGGGGGGGCTCTCTGTCTTTCTTATCGGAGAGAACTTA
TAATGTCATCATCACCGCTCATGGATTAATTATAATTTTCTTCTTCGTGATACCAGTCTT
AATGGGAGGATTCAGAAACTGGCTACTACCATTGATGTTAGGTTGTGCGGATATAGCATT
TCCCCGCCTGAATAATCTTTCCTTTTGGCTTCTGCCACCTAGTCTATGCTTACTCTTACT
CAGAAGACTCATAGAGGCCGGGGTAGGCGCTGGGTGAACCATCTACCCCCCCATGAGGAG
CCTGATGGGACAACCTGGAGGAAGGGTGGATTTAGCCATCTTTAGATTGCACGTGGCGGG
AGTCTCCTCTATCGGAAGATCTATTAATTTTCTTTGTACTATTATTAACCTTCGAG-CCT
TCCTATTAATTGAGAGAT--AATTCCCCTGTTTGTGTGAACGGTTTTTTTTACCGCCATC
TTACTAGTGTTATCCCTTCCTGTCTTTGCTGGAGGGATCACCATACTACTGACAGATCGG
AATCTGAACACCTCTTTTTTTGATCCAGCTGGGGGGGGGGATCCAGTTTTATTTGTTCAT
TTGTTT----------
>Acoela_Childia_brachyposthium_IDAWHel_27_GBFR837847
-AGTTTATATTTTATTTTTGGCATAGCTTCAGGGTTACTCGGTTCTATTTTAAGACTTGC
AATTCGAAGTGAGCTACGAACCGGAGGGGC------ATCGTTTTTAAGTGAAAGTACTTA
TAATGTCATTGTAACCGCTCATGGGCTAATTATAATTTTTTTTTTCGTTATACCTGTACT
AATGGGTGGGTTTAGGAATTGACTTCTGCCCCCAATAGTAGGAAGCGCGGATATGGCCTT
CCCGCGCCTTAACAATTTTTCTTTTTGACTTCTGCCCCCCAGCCTTACTCTCCTCCTCCT
AAGTAGTCTAGTTGAGGTGGGAGTTGGGGCGGGGTGAACTATCTACCCCCCAATAAGAAG
GCTGATGGGGCAACCGGGTGGCAGGGTGGATTTAGCCATTTTCAGGTTACATGTGGCGGG
AATTTCCTCCATTGGAAGGTCAATTAACTTCCTTTGTACTATTATCAACCTACGGCAGAG
GATAATAAGTTGGGAGAT--AATTCCACTCTTTGTGTGAACCATTTTTTTTACTGCCATT
TTACTCGTACTTTCCTTGCCTGTTTTTGCTGGCGGTATTACCATGCTTCTGACAGATCGA
AATTTAAATACATCCTTTTTCGATCCCTCAGGTGGGGGGGATCCAATTTTGTTTGTCCAC
TTATTC----------
>Acoela_Childia_macroposthium_IDAWHel_28_GBFR837848
-AGATTATATTTTATTTTTGGAATAGCTTCAGGACTATTAGGGTCTATTTTGAGACTAGC
TATTCGAAGAGAGTTACGAAATGGGGGTGC------ATCATTTCTTAGTGAGAGATCTTA
CAATGTTATCGTTACAGCTCACGGTCTTATTATAATTTTCTTTTTTGTGATGCCTGTCTT
AATGGGAGGATTCACGAACTGGCTTCTGCCTCCAATAGTGGGAAGAGCGGATATGGCTTT
TCCCCGATTGAATAATTTCTCTTTCTGGCTTTTACCCCCTAGATTAATATTCTTACTCTT
AAGGAGAATAATCGAAACGGGGGTTGGGGCAGGTTGAACCATCTATCCCCCCATAAGAAG
ACTTATGGGACAACCCGGAGGAAGTGTGGATATGGCAATTTTCAGGCTTCATGTAGCTGG
GATCTCTTCTATTGGGAGTTCAATTAATTTCTTATGTACAATTATCAACCTCCGGCAAGT
TCTCATAAGATGGGAGAT--AATTCCTCTGTTTGTGTGAACAATTTTCTTTACAGCCATT
TTATTAGTGTTATCATTACCAGTCTTTGCGGGGGGGATTACCATACTCTTAACAGATCGC
AATCTAAACACCTCATTTTTTGATCCATCTGGGGGAGGGGATCCCATTCTTTTTGTACAC
CTATTT----------
>Acoela_Eumecynostomum_macrobursalium_IDUJ12_150_COI
------------------------------------------AACTATTTTAAGAGTTTT
AATCCGGATGGAATTACGGTACCCTAGAAC------TTCCTTCCTCACAGAAACAGCCTA
TAACGTTACAATTACCTCCCATGGTTTAATTATGATTTTTTTTTTTGTGATACCCATTCT
TATGGGCGGTTTCGGAAATTGGCTCCTTCCCCTTATGTTGGGGTGTGGGGATATGGCTTT
CCCGCGTTTAAATAATTTATCTTTCTGACTTTTACCTCCGAGGTTATGCTTACTAATTTT
TAGGAAATTAGTAAAATCAGGTGTCGGAGCCGGATGGACAATCTATCCCCCTATAAGAGA
TTTAGTAGGACAACCAGGCCCAAGTGTTGATTTGGCTATTTTTAGACTTCATATCGCAGG
AGTCTCCTCTATTGGAGGGTCCATCAATTTCATTTGCACTATTATTAACGTCCGAAACCC
TGCTTTCACCTGAGAAAA--AATTCCCCTTTTTATTTGGGCAGTTTTTTTTACCGGCATT
CTTCTCGTCTTATCCCTTCCTGTTTTTGCGGGGGGGATTACAATATTATTAACAGATCGA
AATTTTAATACTTCTTTTTTTGACC-----------------------------------
----------------
>Acoela_Eumecynostomum_sp5_IDUJ13_493_COI
------------------------------------------AACTATTTTAAGAGTTTT
AATCCGGATGGAATTACGGTACCCTAGAAC------TTCCTTCCTCACAGAAACAGCCTA
TAACGTTACAATTACCTCCCATGGTTTAATTATGATTTTTTTTTTTGTGATACCCATTCT
TATGGGCGGTTTCGGAAATTGGCTCCTTCCCCTTATGTTGGGGTGTGGGGATATGGCTTT
CCCGCGTTTAAATAATTTATCTTTCTGACTTTTACCTCCGAGGTTAGGCTTACTAATTTT
TAGGAGATTAGTAGAATCAGGTGTCGGAGCCGGATGGACAATCTATCCCCCTATAAGAGA
TTTAGTAGGACAACCAGGCCCAAGTGTTGATTTGGCTATTTTTAGACTTCATATCGCAGG
AGTCTCCTCTATTGGAGGGTCCATCAATTTCATTTGCACTATTATTAACGTCCGAAACCC
TGCTTTCACCTGAGAAAA--AATTCCCCTTTTTATTTGGGCAGTTTTTTTTACCGGCATT
CTTCTCGTCTTATCCCTTCCTGTTTTTGCGGGGGGGATTACAATATTATTAACAGATCGA
AATTTTAATACTTCTTTTTTTGACCCAAGAGGTGGAGGAGACCCGGTCCTTTTTGTTCAT
TTATTTTGATTTTTT-
>Acoela_Eumecynostomum_macrobursalium_IDUJ13_265_COI
AACTCTGTACTTTATTTTTGGGATTTTTTCCGGAATTATTGGAACTATTTTAAGAGTTTT
AATCCGGATGGAATTACGGTACCCTAGAAC------TTCCTTCCTCACAGAAACAGCCTA
TAACGTTACAATTACCTCCCATGGTTTAATTATGATTTTTTTTTTTGTGATACCCATTCT
TATGGGCGGTTTCGGAAATTGGCTCCTTCCCCTTATGTTGGGGTGTGGGGATATGGCTTT
CCCGCGTTTAAATAATTTATCTTTCTGACTTTTACCTCCGAGGTTAGGCTTACTAATTTT
TAGGAGATTAGTAGAATCAGGTGTCGGAGCCGGATGGACAATCTATCCCCCTATAAGAGA
TTTAGTAGGACAACCAGGCCCAAGTGTTGATTTGGCTATTTTTAGACTTCATATCGCAGG
AGTCTCCTCTATTGGAGGGTCCATCAATTTCATTTGCACTATTATTAACGTCCGAAACCC
TGCTTTCACCTGAGAAAA--AATTCCCCTTTTTATTTGGGCAGTTTTTTTTACCGGCATT
CTTCTCGTCTTATCCCTTCCTGTTTTTGCGGGGGGGATTACAATATTATTAACAGATCGA
AATTTTAATACTTCTTTTTTTGACCCAAGAGGTGGAGGAGACCCGGTCCTTTTTGTTCAT
----------------
>Acoela_Postmecynostomum_glandulosum_IDUJ13_277_COI
AACTCTGTACTTTATTTTTGGGATTTTTTCCGGAATTATTGGAACTATTTTAAGAGTTTT
AATCCGGATGGAATTACGGTACCCTAGAAC------TTCCTTCCTCACAGAAACAGCCTA
TAACGTTACAATTACCTCCCATGGTTTAATTATGATTTTTTTTTTTGTGATACCCATTCT
TATGGGCGGTTTCGGAAATTGGCTCCTTCCCCTTATGTTGGGGTGTGGGGATATGGCTTT
CCCGCGTTTAAATAATTTATCTTTCTGACTTTTACCTCCGAGGTTAGGCTTACTAATTTT
TAGGAGATTAGTAGAATCAGGTGTCGGAGCCGGATGGACAATCTATCCCCCTATAAGAGA
TTTAGTAGGACAACCAGGCCCAAGTGTTGATTTGGCTATTTTTAGACTTCATATCGCAGG
AGTCTCCTCTATTGGAGGGTCCATCAATTTCATTTGCACTATTATTAACGTCCGAAACCC
TGCTTTCACCTGAGAAAA--AATTCCCCTTTTTATTTGGGCAGTTTTTTTTACCGGCATT
CTTCTCGTCTTATCCCTTCCTGTTTTTGCGGGGGGGATTACAATATTATTAACAGATCGA
AATTTTAATACTTCTTTTTTTGACCCAAGAGGTGGAGGAGACCCGGTCCTTTTTGTTCAT
TTATTT----------
>Acoela_Eumecynostomum_sp5_IDUJ13_498_COI
AACTCTGTACTTTATTTTTGGGATTTTTTCCGGAATTATTGGAACTATTTTAAGAGTTTT
AATCCGGATGGAATTACGGTACCCTAGAAC------TTCCTTCCTCACAGAAACAGCCTA
TAACGTTACAATTACCTCCCATGGTTTAATTATGATTTTTTTTTTTGTGATACCCATTCT
TATGGGCGGTTTCGGAAATTGGCTCCTTCCCCTTATGTTGGGGTGTGGGGATATGGCTTT
CCCGCGTTTAAATAATTTATCTTTCTGACTTTTACCTCCGAGGTTAGGCTTACTAATTTT
TAGGAGATTAGTAGAATCAGGTGTCGGAGCCGGATGGACAATCTATCCCCCTATAAGAGA
TTTAGTAGGACAACCAGGCCCAAGTGTTGATTTGGCTATTTTTAGACTTCATATCGCAGG
AGTCTCCTCTATTGGAGGGTCCATCAATTTCATTTGCACTATTATTAACGTCCGAAACCC
TGCTTTCACTTGAGAAAA--AATTCCCCTTTTTATTTGGGCAGTTTTTTTTACCGGCATT
CTTCTCGTCTTATCCCTTCCTGTTTTTGCGGGGGGGATTACAATATTATTAACAGATCGA
AATTTTAATACTTCTTTTTTTGACCCAAGAGGGGGAGGAGACCCGGTCCTTTTTGTTCAC
CTTTTT----------
>Acoela_Paramecynostomum_sp_IDUJ11_4018_COI
-----TGTACTTTATTTTTGGGATTTTTTCCGGAATTATTGGAACTATTTTAAGAGTTTT
AATCCGGATGGAATTACGGTACCCTAGAAC------TTCCTTCCTCACAGAAACAGCCTA
TAACGTTACAATTACCTCCCATGGTTTAATTATGATTTTTTTTTTTGTGATACCCATTCT
TATGGGCGGTTTCGGAAATTGGCTCCTTCCCCTTATGTTGGGGTGTGGGGATATGGCTTT
CCCGCGTTTAAATAATTTATCTTTCTGACTTTTACCTCCGAGGTTAGGCTTACTAATTTT
TAGGA-ATTAGT-AAATCAGGTGTCGGAGCCGGATGGACAATCTATCCCCCTATAA--AA
TTTAGTAGGACAACCAGGCCCAAGTGTTGATTTGGCTATTTTTA-ACTTCATATCGCAGG
AGTCTCCTCTATTGGAGGGTCCATCAATTTCATTTGCACTATTATTAACGTCCGAAACCC
TGCTTTCACCTGA-AAAA--AATTCCCCTTTTTATTTGGGCAGTTTTTTTTACCGGCATT
CTTCTCGTCTTATCCCTTCCTGTTTTTGCGGGGGGGATTACAATATTATTAACAGATCGA
AATTTTAATACTTCTTTTTTTGACCCAAGAGGTGGAGGAGACCCGG-CCTTTTTGTTCAT
TTATTT----------
>Acoela_Otocelis_sandara_IDMHOs_GBFR837878
-ACTTTATATTTTGTATTTGGAATCTTCTCTGGAGTAGTTGGAACCCTCCTAAGAATGTT
AATTCGTGCCGAATTGCGATATCCGGCTGC------TTCGTTCCTCTCAGAGGCGTCCTA
TAATGTGGCCATTACTGCCCACGGCCTCATTATAATTTTCTTCTTTGTCATGCCAGTTCT
GATGGGCGGATTTGGAAATTGACTTCTACCGCTCATGTTAGGCTGCGGAGATATGGCTTT
CCCTCGCTTAAATAATCTCTCATTTTGACTTCTCCCCCCTAGCCTTGGATTACT-ATCCT
AAGGAGATTAGTCGAGGTCGGAGTGGGGGCAGGGTGAACAATTTACCCGCCAATAAGAGA
TCTCGTGGGACAACCAGGAGCAAGGGTTGACTTGGCCATTTTTAGGCTCCATATCGCGGG
AGTTTCCTCGATTGGGGGTTCAATCAACTTTCTCTGCACCATTATCAATCTTCGAAATCC
TAGTTTGACGTGAGAAAA--ACTCCCGCTTTTCATTTGAGCTGTATTCTTCACTGCGATT
CTTTTAGTTCTCTCCCTCCCAGTTTTCGCTGGGGGTATTACCATGCTATTAACTGACCGA
AACTTCAATACTTCCTTTTTTGATCCTAGAGGGGGGGGAGATCCCGTTCTATTTGTGCA-
----------------
>Acoela_Amphiscolops_bermudensis_IDAWA14_Amp_GBFR837839
-ACAATATACTTTATTTTTGGAATCTTTGCTGGAACTATAGGAGGCCTAATGAGAGTTCT
TATTCGAACAGAGCTACGAATAATAGGACC------TTCTATTATCTCTGAGAATTCTTA
TAATGTTTTGATTACAGCCCATGGGCTGATAATAATTTTCTTTTTTGTAATACCAGTACT
TATAGGAGGTTTTGGTAATTGATTACTTCCTTTAATGTTAGGATGTGCAGATATGGCTTT
TCCTCGACTAAATAATTTTTCTTTTTGACTTCTTCCTCCTAGGATAACACTTCTTTTAAT
GAGAAGGTTAATAGAAGCTGGAGTAGGAGCGGGATGAACTATTTATCCTCCTATGTCTAG
TTTGGTAGGTCAACCAGGAATGAGGGTAGATCTTGCTATTTTTAGTTTACATCTGTCAGG
AGTTTCTTCAATCGGTGGATCTATTAACTTTTTATGCACTATTGCTAATTTACGGTCACC
AAGAATAAAATGAGAGAA--TATCCCACTTTTTATTTGAGGAGTTTTCTTTACAGCGATT
CTTTTAGTTATCTCTCTTCCAGTTTTTGCTGGAGGAATTACTATACTACTTACGGATCGA
AATTTTAATACTTCCTTTTTTGATCCTTCTGGGGGAGGAGATCCTATTCTCTTTGCCCAT
TTGTTT----------
>Acoela_Heterochaerus_blumi_IDMHAb_GBFR837864
-ACCATATACTTTGTTTTTGGAATTTTTGGTGGGACTTTTGGAGGTCTTATAAGAGTGTT
AATTCGAACAGAGTTACGAATGGCTGGGCC------TTCTATTATCACGGAAAATAGATA
CAATGTTTTAATTACTGCACATGGGTTGATTATAATTTTTTTTTTTGTAATACCTGTTTT
AATGGGGGGTTTTGGAAATTGACTGTTGCCCCTTATATTGGGTTGTGCTGACATGGCATT
TCCGCGACTTAATAATTTGTCCTTTTGACTGTTGCCCCCCAGCCTTTTATTGCTTCTCCT
TAAAAAAATGGTAAAAGTTGGAGTGGGGGGGGGGTGAACAATTTACCCTCCAATATCTAG
TTTAGTAGGTCAACCTGGAATGAGTGTGGATTTAGCTATCTTTAGTTTACACTTGAGAGG
AGTTTCCTCTATTGGAGGATCAATTAATTTTCTCTGCACTATTGCTAATTTACGATCCCC
CAGGATGAGGTGGGAAAA--TATTCCCTTATTTATTTGGGGGGTTTTTTTTACCGCTATT
TTATTGGTTGTGTCCTTACCAGTTTTTGCTGGTGGGATTACTATACTCTTAACTGATCGA
AATTTTAACACTTCTTTTTTTGACCCTTCAGGAGGGGAAAATCCCATTCTTTTTGCCCAC
TTATTT----------
>Acoela_Anaperus_gardineri_IDMHAg_GBFR837840
-------TATTTCCTTTTTGGGATCTTTTCGGGACTTGTTGGGAGACTATTAAGACTACT
CATCCGGTCAGAATTGCGGTTGGGGGGGCC------GAGAATTCTTTCCGAAAATGCCTA
CAATGTAACCATTACGGCTCACGGATTAATTATAATTTTTTTTTTTGTAATGCCCATTCT
TATGGGGGGATTCGGCAATTGATTATTGCCCCTCATACTGGGGTGTGGCGATATGGCCTT
TCCTCGTTTAAATAATTTTTCATTTTGACTTCTCCCCCCTAGATTGTCCCTCCTCATTTT
GAGGAGGATCGCAGAATTGGGGGTAGGCTGTGGGTGAACAATCTATCCTCCTATGTCTAG
ATCTTTAGGACAGCCTGGAATGAGAGTGGATTTAGCAATCTTTAGGTTGCATATTGCCGG
GGCTTCCTCCATTGGGGGATCAATTAATTTTCTCTGTACCATTAGAAACTTACGAAGTCC
TAGAGTGAGGTGAGAACA--TCTTCCTCTATTCATTTGAGGGATTTTTTTTACCGCAATT
CTTTTAGTTGTCTCTCTCCCGGTTTTTGCTGGGGGGATTACCATACTTCTTACAGATCGA
AATTTTAATACTTCTTTTTTTGACCCCAA-GGGGGGTGCGATCCCATTCTTTTTGCTCAC
CTA-------------
>Acoela_Conaperta_sp3_IDUJ12_085_COI
AACTTTATATTTTATTTTTGGTATTGGTTCAGGGTTTATTGGAACTTTGATAAGGGTGCT
TATCCGATCAGAACTACGAATGGGGGGTCC------TACCATTTTATCTGAAAATGCTTA
TAATGTTACAATTACTGCCCATGGATTAATTATGATTTTCTTTTTTGTAATACCTATTTT
GATGGGTGGATTTGGGAATTGGCTCCTCCCCCTAATGTTGGGGTGTGGTGACATAGCTTT
CCCCCGACTTAATAATCTCTCGTTTTGGCTCCTTCCCCCTAGCCTATCACTACTGGTGAT
AAGAAGAATTGTGGAGTTAGGAGTTGGGTGCGGGTGGACTGTCTACCCCCCCATATCAAG
AATTGTTGGGCAGCCTGGGATAAGGGTTGATTTAG-TATTTTTAGGTTACACATTGCTGG
GGCTTCTTCCATCGGGGGATCGATTAATTTTTTGTGTACCATTAGAAATTTACGAAGT-T
TAGAGTTGGTTGAGAACA--ACTACCTCTTTTTATTTGGGGGGTGTTCTTTACGGCTATC
CTATTGGTGATTTCTTTACCTGTATTTGCGGGTGGAATTACCATATTA-TAACCGATCGA
AATTTCAATACTTCTTTCTTTGATCCTAATGGGG--------------------------
----------------
>Acoela_Conaperta_sp3_IDUJ12_087_COI
AACTTTATATTTTATTTTTGGTGTTGGTTCAGGGTTTATTGGAACTTTAATAAGGGTGCT
TATCCGATCAGAACTACGAATGGGGGGTCC------TACCATTTTATCTGAAAATGCTTA
TAATGTTACAATTACTGCCCACGGATTAATTATGATTTTCTTTTTTGTAATACCTATTTT
GATGGGGGGATTTGGGAATTGGCTTCTCCCCCTAATGTTGGGGTGTGGTGACATAGCTTT
CCCCCGACTTAATAATCTCTCCTTTTGGCTTCTCCCACCTAGCCTATCACTACTGGTGAT
AAGAAGAATTGTGGAGTTAGGAGTTGGGTGTGGGTGGACTGTCTACCCCCCCATATCAAG
AATTGTTGGGCAGCCTGGGATAAGGGTTGATTTAGCTATTTTTAGGTTGCACATTGCTGG
TGCTTCTTCCATTGGGGGGTCGATTAATTTTTTGTGTACCATTAGAAATTTACGAAGTCC
TAGAGTTGGTTGAGAACA--ACTACCTCTTTTTGTTTGGGGGGTGTTCTTTACGGCTATC
CTATTGGTGATTTCTTTACCTGTATTTGCGGGGGGAATTACCATATTACTAACCGATCGA
AATTTCAATACTTCTTTCTTTGATCCTAATGGGGGTGGAGATCCTATTTTATTTTCTCAC
TTATTT----------
>Acoela_Neochildia_fusca_IDMHNf_GBFR837876
-ACTTTGTATTTTATTTTTGGAATTCTCTCTGGAATCGTAGGTAGATTAATAAGTTTACT
TATTCGATCGGAATTACGTTTGGGGGGGCC------TAGAATCCTCTCTGAAAATGCCTA
CAATGTAACCATTACAGCCCATGGATTAATTATAATTTTTTTCTTTGTTATACCCATCTT
AATGGGTGGGTTTGGGAATTGATTATTACCTTTAATATTAGGTTGTGGGGATATGGCCTT
CCCACGATTAAATAATCTTTCTTTTTGATTTCTTCCCCCAAGACTCTCTTTATTAGTTAT
AAGGAGAATCGCTGAACTAGGAGTGGGTTGTGGTTGAACAATTTACCCCCCAATATCAAG
AATTGTGGGCCAACCAGGAATAAGAGTAGATTTAGCCATCTTTAGATTGCATATCGCAGG
GGCATCCTCTATTGGGGGATCGATTAACTTCCTTTGTACCATTAGAAATCTTCGAAGTCC
TAGAGTAGGTTGAGAACA--ACTTCCTTTGTTTATTTGGGGAGTATTTTTTACTGCTATT
TTATTAGTAGTGTCTTTACCAGTTTTTGCGGGGGGAATTACCATATTATTAACCGATCGT
AATTTTAATACTTCTTTTTTCGACCCTAACGGGGGAGGAGATCCTGTTCTATTTGCTCA-
----------------
>Acoela_Anaperus_rubellus_IDUJ07_47_GBFR837841
-ACTCTCTACTTCTTATTTGGCATTTTTTCAGGATTGGTGGGAAGACTTTTAAGGCTCCT
CATCCGATCGGAGCTTCGTGTGGGGGGTCC------AAGGATTCTATCAGAAAATGCCTA
TAATGTTACTATTACAGCCCACGGCTTAATTATAATCTTCTTCTTCGTTATGCCTGTATT
AATGGGAGGATTTGGGAATTGACTCCTCCCCCTCATACTAGGATGCGGAGACATGGCCTT
TCCACGATTGAATAACTTTTCTTTCTGGCTCCTACCCCCAAGACTCTCACTCCTCTTATT
GAGGAGAATTGTAGAGATGGGGGTGGGATGCGGATGGACTATTTACCCACCCATGTCTAG
AATCATTGGACAGCCTGGAATAAGAGTCGACTTGGCCATCTTTAGGCTTCATATTGCCGG
GGCCTCCTCTATTGGAGGGTCCATTAACTTCCTATGCACTATCGCTAACCTCCGGAGCCC
AAGAGTTCGATGGGAACA--ACTCCCCCTATTCATTTGGGGAGTGTTTTTCACAGCAATC
CTTTTAGTTCTCTCTCTCCCAGTCTTTGCTGGAGGAATTACTATGCTCTTAACCGATCGA
AACTTTAATACCTCATTTTTCGACCCTAATGGGGGAGGAGATCCAATCTTATTTGCTCAT
TTATTT----------
>Acoela_Anaperus_singularis_IDAWSp_24_GBFR837842
-ACTCTATATTTCCTTTTTGGAATTTTCTCCGGTCTCGTTGGGACTCTTTTAAGAGTACT
AATTCGTTCAGAATTACGAGTTGGGGGGCC------ATCTATATTATCTGAAAATGCTTA
TAATGTAACCATTACAGCCCATGGATTAATTATAATTTTCTTTTTTGTTATACCTGTATT
AATGGGGGGGTTTGGAAATTGACTCCTTCCTTTAATATTGGGATGTGGGGATATAGCCTT
TCCTCGACTAAACAATTTTTCCTTTTGACTTCTCCCGCCTAGATTATCCCTTCTCTTACT
TAGGAGAGTTGTTGAAATGGGAGTTGGATGTGGATGAACAATTTACCCACCAATATCTAG
AAGAATTGGACAACCCGGAATGAGAGTTGATCTCGCCATTTTTAGCCTTCATATTGCAGG
AGCTTCTTCTATTGGAGGTTCTATTAATTTCCTTTGTACGATTTCAAACTTACGAAGACC
GAGGGTCGGTTGAGAGAA--ACTACCACTTTTTATTTGGGGAGTTTTTTTTACTGCAATT
TTATTAGTTTTATCCCTTCCAGTCTTTGCTGGTGGAATTACCATACTCCTTACTGATCGT
AATTTTAATACATCATTTTTTGATCCTAATGGTGGAGGAGATCCAGTATTATTTTCTCAC
TTATTT----------
>Acoela_Convoluta_convoluta_IDMHCc_GBFR837852
-ACTCTTTATTTTATCTTTGGAGTCTCCTCCGGATTAGTGGGGGGGCTTTTGAGGCTTTT
TATTCGTACCGAGCTTCGGTTTCCCGGTCC------AACGTTCCTGAGGGAAACGTCCTA
TAATGTGGTTATTACCGCCCACGGTTTAATCATAATTTTTTTTTTTGTGATGCCTATTTT
AATGGGGGGGTTCGGGAACTGGCTCCTGCCCATCATGTTGGGGTGTGCGGACATGGCATT
TCCTCGTTTAAACAATCTATCTTTTTGATTCCTCCCTCCAAGGCTTCTATTATTAGTTTT
GAGGAGGCTCATCGAAACGGGAGTTGGATCGGGGTGAACCCTCTACCCTCCCCTATCTAG
ATTGGGGGGCCACCCGGGAATGGGGGTGGACTTGGCCATTTTCAGAATACACATTGCCGG
AGTCTCTTCAATTGGGGGGAGAATTAACTTTCTTTGCACCATCTCCAATCTACGATCTCC
CGAGATTTCTTGAGAAAA--TCTCACCCTATTCGTATGGGGTGTTTTTTTCACTGCAATC
CTTCTAGTTATTTCCCTGCCAGTCTTTGCAGGGGGGATTACCATACTTCTCACCGATCGA
AATTTTAACACTTCTTTCTTTGACCCCAATGGGGGTGGGGACCCCATCTTGTTTGCCCAC
CTTTTT----------
>Acoela_Convolutriloba_hastifera_GBEU710926
-----------------------------------------------------GTTTAAT
AATTCGAACGGAATTACGTTCACCAGGACC------TAGATTTCTTTCGGAAAGAGCCTA
CAATGTAGTTATTACTGCTCATGGTTTAATTATAATTTTTTTTTTTGTTATACCTATTTT
AATGGGTGGGTTTGGGAATTGACTTTTACCATTGATATTAGGTTG-GCTGACATAGCCTT
CCCACGAATAAATAATCTATCTTTTTGATTATTACCTCCTAGATTATCTTTTTTAGTTTT
AAGAAGTTTAATTGAAACAGGTGTAGGAACTGGTTGAACTTTATACCCTCCTTTGTCAAG
ATTAATTGGACACCAAAGAATAGGAGTGGATTTAGGTATTTTTAGAATACATATTGCCGG
TGCTTCATCTATTGGAGGTTCAATTAATTTTTTATGTACTATTTCCAATCTTCGATCTCC
CGAAATTACTTGAGAGAA--TCTTACATTATTTGTATGGGGTGTTTTTTTTACAGCTATT
CTTTTAGTTATTTCTCTACCAGTTTTTGCAGGAGGAATTACTATACTTTTAACAGATCGT
AATTTTAATACTTCATTTTTTGACCCTAGAGGGGGGGGAGATCCTGTTTTATTCGCACAT
CTATTT----------
>Acoela_Convolutriloba_longifissura_IDAWColo_GBFR837853
-ACATTATATTTTATTTTTGGTATTTTTTCTGGGTTTGTTGGAGGTTTGTTGAGTTTAAT
AATTCGAACAGAATTACGTTCTCCCGGTCC------TAGATTTTTATCTGAAAGAGCTTA
TAATGTTGTTATTACTGCTCATGGGTTAATTATAATTTTTTTTTTTGTCATACCTATTTT
AATAGGTGGTTTTGGAAATTGATTATTACCTTTAATATTAGGTTGCGCAGATATAGCTTT
TCCTCGAATAAATAATTTATCTTTTTGATTACTTCCTCCCAGGTTGTCTTTTTTAGTTCT
TAGTAGTTTAATTGAAACAGGGGTTGGTACTGGTTGAACATTATATCCTCCTCTCTCTAG
TTTAATTGGACATCAAAGAATGGGAGTGGATTTAGGTATTTTTAGAATACATATTGCTGG
AGCATCATCTATCGGAGGATCGATTAATTTTTTATGCACTATCTCCAATCTTCGATCTCC
TGAAATTACTTGAGAAAA--TTTAACGTTATTTGTTTGAGGTATTTTTTTTACTGCTATT
TTGTTAGTTATTTCTTTACCAGTTTTTGCAGGGGGTATTACTATACTTTTAACAGATCGT
AATTTTAATACTTCTTTTTTTGATCCAAAAGGAGGTGGTGATCCTGTTTTATTTGCTCAT
CTTTTT----------
>Acoela_Convolutriloba_retrogemma_GBEU710924
-----------------------------------------------------GTTTGAT
AATTCGGACTGAGTTACGATCTCCTGGACC------TAGTTTTCTTTCTGAAAGAGCTTA
TAATGTGGTGATTACTGCTCACGGTTTGATTATGATTTTTTTTTTTGTTATGCCCATCTT
AATGGGGGGATTTGGAAATTGGCTATTACCTTTAATATTAGGTTGTGCTGACATGGCTTT
TCCTCGAATAAATAACTTGTCTTTTTGATTGTTGCCTCCTAGATTGTCTTTTTTGGTTCT
TAGAAGTTTAATTGAAACAGGAGTTGGCACTGGTTGAACACTATATCCCCCTCTCTCCAG
TTTAATTGGCCACCAGAGAATGGGAGTGGATCTAGGTATTTTTAGAATGCATATTGCTGG
GGCTTCTTCTATTGGAGGTTCAATTAATTTTTTATGTACTATTTCTAATTTACGATCTCC
TGAAATTACTTGAGAAAA--TTTAACCTTATTTGTTTGGGGGGTTTTTTTTACTGCTATT
CTTCTAGTTATTTCTTTACCAGTTTTTGCAGGAGGGATCACCATGTTGTTAACTGATCGA
AATTTTAACACATCTTTTTTTGATCCAAGAGGAGGAGGAGATCCTGTTTTATTTGCTCAT
CTTTTT----------
>Acoela_Convolutriloba_macropyga_GBEU710922
------------------------------------------------------GCTTAT
AATTCGAACTGAATTACGTTCTCCTGGTCC------TAGATTTCTTTCAGAAAGAGCTTA
TAATGTAGTGATTACTGCTCACGGGTTAATTATAATTTTTTTTTTTGTTATACCCATTTT
AATAGGTGGTTTTGGAAATTGACTTCTTCCTCTCATATTAGGTTG-GCTGATATAGCTTT
TCCTCGAATAAATAATCTTTCTTTTTGGCTTTTACCTCCTAGATTATCTTTTTTAATCTT
AAGAAGATTAATTGAAACTGGAGTGGGGACTGGGTGAACTTTATACCCACCTCTTTCTAG
ACTAATTGGCCACCAAAGAATGGGTGTTGATTTAGGTATTTTTAGAATACACATTGCTGG
GGCTTCCTCCATTGGAGGTTCGATTAATTTTTTATGTACCATTTCAAATCTACGTTCCCC
TGAGATTACTTGAGAAAA--TTTAACTTTATTTGTTTGAGGAGTATTTTTTACTGCTATT
TTATTGGTTATTTCTTTACCTGTTTTTGCAGGAGGAATTACAATATTATTAACTGATCGA
AATTTTAATACTTCTTTTTTTGATCCAAGAGGAGGAGGGGACCCTGTTTTATTTGCTCAT
TTGTTT----------
>Acoela_Sagittiferidae_IDUJ10_85_COI
-AACTTTTTTTTTTTATTTGGGATTTTTTCTGGATTTCTAGGAGGTCTTCTTAGGTTGGT
AATTCGTACTGAATTACGATCACCAGGTCC------AACATTTATCTCTGAAAGAGCTTA
CAATGTTGTTATTACAGCTCACGGGTTAATTATAATTTTTTTTTTCGTAATACCTGTTTT
AATAGGGGGTTTTGGAAATTGATTACTTCCTATTATATTAGGATGTGCTGACATGGCTTT
TCCTCGATTAAATAATCTTTCTTTTTGACTTCTTCCCCCTAGAATTAGATTGTTAATCTT
AAGAAGATTAATTGAAACAGGGGTAGGGACTGGGTGAACTCTATACCCTCCTCTTTCAAG
ATTGATTGGCCACCAAAGGATGGGTGTTGATTTGGCCATTTTTAGAATACATATTGCAGG
TGCTTCCTCTATTGGTGGTTCTATTAATTTTTTATGTACTATTAGGAATTTACGATCCCC
GGAAATTACTTGAGAGAA--TTTAACTTTATTTGTTTGAGGGGTGTTTTTTACTGGTATT
TTGCTTGTTCTTTCCTTACCAGTTTTTGCAGGTGGAATCACTATACTTTTAACAGATCGA
AATTTTAATACTTCCTTTTTTGATCCAAGAGGGGGGGGGGATCCTGTGTTATTTGCACAT
T---------------
>Acoela_Symsagittifera_psammophila_IDAWSp_04_GBFR837903
-ACTTTATATTTTATTTTTGGAATTTTCTCAGGGTTTTTAGGAGGATTATTAAGTTTAAT
TATTCGAACTGAATTACGTTCTCCCGGTCC------TTCTTTTATTTCAGAAAGATCTTA
TAATGTGGTTATTACTGCTCATGGTTTAATTATAATTTTTTTTTTTGTAATACCTGTATT
AATGGGGGGGTTTGGTAATTGATTGCTTCCTATTATATTAGGATGCGCAGATATGGCTTT
TCCTCGTTTAAATAATTTATCTTTTTGACTTCTTCCTCCCAGGATTAGTTTATTAATCCT
AAGAAGTTTAATTGAAACTGGGGTGGGTACTGGTTGAACTTTTTACCCCCCCTTATCAAG
TTTAATTGGCCACCAAAGAATGGGAGTTGATTTAGGGATTTTTAGAATACACATTGCTGG
AGCCTCTTCTATTGGAGGGTCAATTAATTTTTTATGTACAATTAGGAATTTACGTTCTCC
AGAAATTACTTGAGAAAA--TTTAACTTTATTCGTATGAGGAGTTTTTTTCACTGCAATT
TTACTGATTTTATCTTTACCTGTTTTTGCTGGAGGGATTACCATACTTCTTACAGACCGT
AATTTTAATACTTCTTTTTTTGATCCAAGAGGAGGAGGGGATCCAGTTTTATTTTCCCAT
TTATTT----------
>Acoela_Symsagittifera_schultzei_IDUJ14_021_COI
AACCTTATATTTTATTTTTGGAATTTTTTCGGGGTTTCTAGGTGGATTATTAAGATTAGT
TATTCGAACTGAGTTACGTTCCCCAGGCCC------TTCTTTTATTTCAGAAAGGTCTTA
TAATGTAGTAATTACCGCTCACGGTTTAATTATAATTTTTTTTTTTGTAATACCTGTTTT
AATAGGAGGATTTGGAAATTGACTACTTCCTATCATATTAGGTTGTGCA-ATATAGCTTT
TCCTCGATTAAATAACCTGTCTTTTTGACTACTTCCTCCAAGAATTA-ACTACTAATTTT
AA-AAGTTTAATTGAAACTGGAGTGGGAACGGGTTGAACCTTATATCCCCCCTTATCAAG
TCTAGTTGGACATCAAAGAATGGGCGTGGATTTAGGTATTTTTAGAATACATATTGCTGG
AGCCTCTTCAATTGGAGGTTCAATTAATTTTTTGTGCACTATTAGGAATTTACGTTCTCC
AGAAATTACTTGAGAAAA--TTTAACTTTATTTGTTTGGGGAGTTTTTTTTACAGCAATT
TTATTATTGTTGTCTTTACCGGTTTTTGCTGGAGGAATTACCATACTTCTCACTGATCGT
AATTTTAACACTTCATTTTTTGACCCTAGAGGAGGAGGAGATCCTGTTTTATTTTCCCAT
TTATTT----------
>Acoela_Symsagittifera_roscoffensis_IDAWSp_37_GBFR837904
-------------------------------GGGCTTCCTAGGAGGTTATTAAGATTAGT
AATTCGAACTGAGTTACGATCCCCAGGACC------TACTTTTATCTCAGAAAGTGCTTA
TAATGTGGTAATTACTGCTCATGGACTGATTATAATTTTTTTTTTTGTAATGCCTGTTTT
AATGGGAGGTTTTGGTAATTGATTACTACCCATCATGTTGGGGTGTGCCGATATGGCTTT
TCCTCGATTAAACAATTTATCTTTTTGACTTCTTCCTCCTAGAATTAGATTATTAATTTT
TAGAAAACTTATTGAAACGGGAGTGGGAACTGGGTGAACATTATACCCACCTTTATCTAG
ATTAATTGGACATCAAAGAATGGGTGTAGATTTAGGAATTTTTAGAATACACATTGCAGG
AGCTTCCTCCATTGGTGGGTCTATTAATTTCTTATGTACAATTAGAAATTTACGATCTCC
CGAAATCACTTGAGAAAA--TCTTACCCTTTTTGTATGAGGGGTTTTTTTTACAGCTATT
TTATTAGTTCTTTCTTTGCCGGTATTTGCAGGAGGTATTACAATACTTCTTACTGATCGT
AACTTCAATACATCTTTCTTTGATCCTAAAGGAGGGGGGATCCCGGTTTTATTTGCTCAT
TTATTT----------
>Acoela_Stomatricha_hochbergi_IDMHSh_GBFR837902
-------TATTTTATTTTTGGAATTTCTTCGGGGCTTTTAGGGAGCTTGTTAAGTTTGTT
TATTCGGACTGAGCTTCGTTTTCCCGGTCC------TAATTTTATTTCCGAAAGAATTTA
CAATGTTATTATTACAGCTCATGGGTTAATTATAATTTTCTTTTTCGTGATACCTATTTT
AATGGGAGGTTTTGGGAATTGACTCCTCCCTCTCATGTTAGGGTGCGGGGATATATCTTT
TCCTCGACTAAATAATTTTTCCTTTTGACTCCTCCCTCCAAGAGGTTTTCTCCTTATTCT
TTCCAGGTTGGTGGAAGTGGGGGTGGGATCTGGCTGGACTTTATATCCCCCCCTCTCCAG
ACTCACTGGGCAGCCGGGAATGGGTGTTGATTTAGCCATTTTTAGAATACATGTCGCAGG
CATTTCCTCCATTGGAGGTTCCATTAACTTTTTATGTACAATTATTAATTTACGATCTCC
AGAGATGACCTGAGAAAA--CCTCCCTTTGTTTGTTTGGGGGGTGTTTTTTACTGCAATT
CTTTTAGTAATTTCTCTTCCTGTTTTTGCTGGAGGAATTACAATACTCCTTACCGACCGT
AATTTTAACACTTCTTTTTTTGATCCTGCGGGGGGTGGGGACCCTTTGCTATTTGCCCA-
----------------
>Acoela_Notocelis_gullmarensis_IDUJ07_37_GBFR837877
-ACTTTATATTTTATTTTCGGAACTTTTGCAGGCGTGGTTGGAACAACAATAAGAGTTTT
AATTCGTAGAGAACTTCGCCAAAACAGAAG------AGTGGGAGTTTCGGAAAGAACATA
CAATGTTCTTATCACTTCTCATGGGCTAATTATAATTTTCTTCTTTGTAATACCTATTCT
CATGGGGGGGTTTGGCAATTGACTCCTGCCCCTAATATTAGGATGCTTAGACATGGCTTT
CCCCCGTCTAAATAATCTTTCATTTTGGCTCCTGCCACCAAGGTTTTTTTTACTAATTTT
AAGAAGCTTGGTTGAAGGAGGAGTTATGGCCGGGTGAACCATTTACCCCCCCCTAAGAGA
TTTGATTGGCCAACCGGGGGCTAGGGTTGATTTTGCAATTTTTAGTCTCCACATTGCTGG
AGTTTCAAGAATTGGTGGCTCAATTAACTTCCTATGCACTATTATTAATTTACGTTGCCC
TCATGTGACTTGAGAAAA--ACTTCCCCTCTTTATTTGGGGAGTTTTTTTTACAGCAATT
CTTTTAGTCCTCTCTCTTCCTGTTTTTGCTGGAGGAATCACTATACTTTTGACAGATCGA
AATTTTAATACCTCCTTCTTT-ATCCTTCAGGAGGTGGAGATCC----C-----------
----------------
>Acoela_Otocelis_sp2_IDUJ12_072_COI
GACTTTATATTTTCTTTTTGGAACCTTTGCAGGCGTGGTTGGAACAACAATGAGAGTTTT
AATTCGTAGAGAACTTCGCCAAAACAGAAG------AGTGGGAGTTTCAGAAAGAACATA
CAATGTTCTTATCACTTCTCACGGGCTAATTATAATTTTCTTTTTTGTAATGCCCATTCT
AATGGGGGGTTTTGGCAATTGACTTTTGCCCCTAATGTTGGGATGCTTAGACATGGCTTT
TCCCCGTCTAAATAATCTTTCATTTTGGCTCCTGCCACCAAGGTTTTTTTTACTGATTTT
AAGGAGATTAGTTGAAAGGGGAGTTATGGCCGGGTGAACCATTTATCCCCCCTTAAGAGA
TTTGATTGGCCAACCGGGGGCAAGGGTTGATTTTGCAATTTTTAGTCTTCACATTGCCGG
AGTTTCCAGAATTGGGGGGTCAATTAACTTCCTATGCACTATTATTAATTTACGTTGCCC
CCATGTGACCTGAGAAAA--ACTCCCACTTTTTATTTGGGGGGTTTTTTTTACAGCAATT
CTTTTAGTTCTATCTCTTCCTGTGTTTGCTGGAGGAATCACCATACTTTTAACAGATCGA
AATTTTAATACCTCCTTCTTTGACCCTTCAGGAGGGGGGGATCCCGTTCTTTTTGTCCAT
TTGTTT----------
>Acoela_Isodiametra_divae_IDMHMa1_GBFR837868
-AGACTTTATTTTATCTTTGGACTATGATCGGGAATTCTTGGGACACTTATAAGTCTATT
AATTCGTACTGAGCTTCGTAGAAGGGGGAG------AAATTTTATAAGGGAAAAAAGTTA
TAATGTCACTATTACAGCCCATGGGCTAATTATAATTTTCTTTTTTGTGATACCTATTTT
AATAGGGGGGTTTGGAAATTGGCTCCTGCCTCTGATGTTGGGCTGTGCCGATATGGCCTT
CCCACGATTAAACAATCTTTCTTTTTGATTACTTCCCCCTAGACTGGGACTACTTCTTCT
TAGAAGATTAGTTGAAGGGGGGGTTGGGGGGGGATGGACAATTTATCCTCCTATGAGGGA
TCTTATCGGACAACCAGGAATAAGAGTTGATTTAGCTATCTTCTCTCTCCATATCGCAGG
AGCCTCGTCCATTGGGGGGAGAATTAACTTCCTCTGTACAATTATTAACTTACGTAGACG
GAACATGACTTGACAAGA--GCTCCCCCTTTTAATTTGAAGGATTTTTTTCACAGCCATT
CTTCTTGTTCTTTCTCTTCCGGTCTTCGCTGGGGGAATTACAATATTACTTACTGATCGC
AATTTTAATA--------------------------------------------------
----------------
>Acoela_Postaphanostoma_nilssoni_IDUJ12_057_GBKF578514
CACACTTTACTTTGTTTTTGGCATTTTTTCTGGA-TTGTAGGAGCTATTATAAGCTTAAT
GATCCGATCCGAACTTCGTGGTTCTGGAGG------AAGCATTATCGGAGAAAATGTGTA
CAATGTTATCATTACTGCACACGGATTAATTATAATTTTTTTTTTCGTCATACCAGTCTT
AATGGGGGGATTTGGAAATTGAATTCTTCCTCTTATGTTAGGCTGCGCGGATATGGCGTT
TCCACGATTAAATAATCTTTCTTTTTGATTTCTCCCACCAAGGCTTGGCTTACTTCTACT
GAGAAGCTTAGCTGGAAGAGGTGTCGGAGCTGGGTGAACTATTTATCCACCAATAAGCTC
TCTTATCGGTCAACCCGGAATTAGGGTTGATTTAGCCATCTTCAGCCTCCATATTGCCGG
AGCCTCCTCTATTGGAAGATCTATCAATTTTTTGTGCACGATTATTAATCTTCGTAACCC
GAGAATAACTTGAGAGCA--AATCCCTCTCTTTGTTTGAAGGGTGTTCTTTACAGCCATT
CTTCTTGTTCTCTCACTTCCTGTTTTTGCGGGTGGAATTACAATATTATTAACTGATCGT
AACTTCAATACAACGTTCTTCGATCCGTCTGGTGGGGGGGACCCTGTTCTTTTCGTGCAT
CTCTTT----------
>Acoela_Atriofronta_polyvacuola_IDUJ11_079_COI
AACCCTATATTTAATTGGAGGAGTATGGGCAGGAATTGTTGGAACCCTTCTTAGAATTCT
TATTCGAAGAGAATTACGGGCACCTGGTAG------AAATATTTTATCAGAAAAAATTTA
TAATGTAATTATTACAGCTCATGGATTAATTATAATTTTTTTTTTTGTTATACCAGTTAT
GATGGGAGGATTTGGAAATTGACTTATTCCATTAATATTAATGGCTGTGGATATAGCCTT
CCCGCGATTAAACAATTTCTCTTTTTGATTATTACCTCCTAGTTTTTTTCTTTTAATTTT
AAGAAGCTTAATGGAAAGAGGGGTTGGAGCAGGGTGGACAATTTATCCCCCCATAAGTGA
TTTAATTGGTCAACCGGGATGGAGTATGGATCTGGCAATCTTTTCTCTTCATATTGCTGG
TGCTTCTTCTATTGGGGGATCAATTAATTTTATTTGCACCTTAACCAATGCCCGAAATTA
TTTAATAACTTGGAATCA--CTTACCCCTGATTTTATGGAGAATTTTTTTTACAGGAATT
CTTTTAGTACTCTCATTGCCAGTGTTCGCAGGAGGACTAACTATACTTCTAACTGATCGA
AATTTTAATACAAGATTTTTTTTCCCGGGGGGAGGAGGAGATCCTGTCTTGTTTGTTCAT
TTATTT----------
>Acoela_Atriofronta_polyvacuola_IDUJ11_082_COI
AACCCTATATTTAATTGGAGGAGTATGGGCAGGAATTGTTGGAACCCTTCTTAGAATTCT
TATTCGAAGAGAATTACGGGCACCTGGTAG------AAATATTTTATCAGAAAAAATTTA
TAATGTAATTATTACAGCTCATGGATTAATTATAATTTTTTTTTTTGTTATACCAGTTAT
GATGGGAGGATTTGGAAATTGACTTATTCCATTAATATTAATGGCTGTGGATATAGCCTT
CCCGCGATTAAACAATTTCTCTTTTTGATTATTACCTCCTAGTTTTTTTCTTTTAATTTT
AAGAAGCTTAATGGAAAGAGGGGTTGGAGCAGGGTGGACAATTTATCCCCCCATAAGTGA
TTTAATTGGTCAACCGGGATGGAGTATGGATCTGGCAATCTTTTCTCTTCATATTGCTGG
TGCTTCTTCTATTGGGGGATCAATTAATTTTATTTGCACCTTAACCAATGCCCGAAATTA
TTTAATAACTTGGAATCA--CTTACCCCTGATTTTATGGAGAATTTTTTTTACAGGAATT
CTTTTAGTACTCTCATTGCCAGTGTTCGCAGGAGGACTAACTATACTTCTAACTGATCGA
AATTTTAATACAAGATTTTTTTTCCCGGGGGGAGGAGGAGATCCTGTCTTGTTTGTTCAT
TTATTT----------
>Acoela_Haplogonaria_syltensis_IDUJ11_302_COI
GTCCCTTTATATTGTAATAGCTTCTTGAGCTGCA-TTGTAGGTACTCAAATAAGAATTAT
AATTCGAATAGAATTACGAAATAATGGGGA------TAATCTGATTTCCGAAAAGATTTA
TAATGTTGTAATTACTGCTCATGGCCTAATTATAATTTTTTTCTTTGTAATACCTTTCAT
AATAGGGGGTTTTGGTAATTGAGTAATCCCTCTTTTTTTAACAAGTGCTGATATAGCTTT
TCCTCGTCTTAACAATTTTTCTTTCTGACTTTTACCTCCGAGATTAACACTCCTTCTTTT
AAGGAGAATTACAGAAAGAGGAGTGGGAGCTGGTTGGACAATCTACCCTCCTATAAGAGA
TATTATTGGGCAACCTGGATGGAGGATAGATTTTGCTATTTTTAGTCTTCATATCGCTGG
AGCTTCTTCTATCGGGGGAAGAATTAATTTTTTATGTACAATATTAAATGCACGCCCTCT
TTCGATATACTGGGAATA--CTTCCCATTACTTCTATGAAGTATTTTTTTCACGGCTATT
CTTCTTGTCCTTTCTTTACCTGTTTTTGCAGGAGGTCTCACCATATTATTGACAGACCGG
AATTTCAATACAAGGTTTTTTTTCCCTGGAGGAGGAGGAGATCCAGTTCTTTTTGTTCAT
TTATTT----------
>Acoela_Haplogonaria_syltensis_IDUJ11_303_COI
GTCCCTTTATATTGTAATAGCTTCTTGAGCTGCAATTGTAGGTACTCAAATAAGAATTAT
AATTCGAATAGAATTACGAAATAATGGGGA------TAATCTGATTTCCGAAAAGATTTA
TAATGTTGTAATTACCGCTCATGGCCTAATTATAATTTTTTTCTTTGTAATACCTTTCAT
AATAGGGGGTTTTGGTAATTGAGTAATCCCTCTTTTTTTAACAAGTGCTGATATAGCTTT
TCCTCGTCTTAACAATTTTTCTTTCTGACTTTTACCTCCGAGATTAACACTCCTTCTTTT
AAGGAGAATTACAGAAAGAGGAGTGGGAGCTGGTTGGACAATCTACCCTCCTATAAGAGA
TATTATTGGGCAACCTGGATGGAGGATAGATTTTGCTATTTTTAGTCTTCATATCGCTGG
AGCTTCTTCTATCGGGGGAAGAATTAATTTTTTATGTACAATATTAAATGCACGCCCTCT
TTCAATATACTGGGAATA--CTTCCCATTACTTCTATGAAGTATTTTTTTCACGGCTATT
CTTCTTGTCCTTTCTTTACCTGTTTTTGCAGGAGGTCTCACCATATTATTAACAGACCGG
AATTTCAATACAAGGTTTTTTTTCCCTGGAGGAGGAGGAGATCCAGTTCTTTTTGTTCAT
TTATTT----------
>Acoela_Pseudaphanostoma_herringi_IDMHMa2_GBFR837895
-TCCCTATATATTGTTTTTGCAACATGAGCTGCAATTGTTGGGACTCAATTAAGAATTAT
AATTCGTATAGAACTTCGTAGAAGTAGAGA------AAATTTCATTTCAGAAAAAATTTA
CAATGTAGTAATTACAGCTCATGGTTTAATTATAATTTTTTTTTTTGTTATACCTTTTAT
AATAGGAGGTTTCGGAAATTGAATTATCCCTTTAATATTAAGTAGGGCGGATATAGCTTT
TCCACGGTTGAACAATTTTTCTTTTTGACTTCTTCCTCCTAGATTTTCTCTGCTTATTTT
AAGAAGAATTACCGAAGGAGGAGTGGGAGCAGGATGAACAATTTATCCCCCCATAAGAGA
CTTACTGGGTCAGCCTGGCTGAAGTATAGATTTTGCAATTTTTTCTCTTCATATTGCGGG
AGCTTCTTCTATTGGAGGTTCTATTAATTTTCTGTGTACTATATTAAATGCTCGTCCTTT
ATCTATGTTTTGGGATTA--TTTTCCTTTATTGCTTTGGAGAATTTTTTTTACTGCAATT
TTACTTGTTTTATCTCTTCCTGTATTTGCAGGAGGTTTAACTATACTATTAACAGATCGA
AATTTTAATACAAGATTTTTTTTTCCTGGGGGAGGAGGAGACCCTGTTTTATTTGAACAT
TTATTC----------
>Acoela_Isodiametra_sp4_IDUJ11_159_COI
AACACTTTATTTTTTCCTAGGTGCCTGAGCAGGCATTATCGGCACTATGTTGAGAGTTTT
AATCCGGATAGAACTCCGAATATCGGGAGG------AAATCTTATTTCAGAAAAAATTTA
CAATGTCGTTATTACTTCTCACGGTTTAATTATAATCTTTTTTTTTGTTATGCCCGTTAT
AATGGGGGGATTTGGAAATTGAATTATTCCCCTCATACTAGGAAGAGCAGATATGGCCTT
TCCTCGACTAAACAATTTTTCCTTTTGGTTATTACCTCCAAGATTTTCTCTTCTTCTCCT
GAGTAGGGTGACTGAGAGAGGAGTGGGGGGTGGTTGAACCATTTACCCCCCAATAAGAGA
TATTTTAGGCCAACCAGGTTGAAGAATGGATTTAGCTATTTTTAGGCTCCATATCGCTGG
AGCTTCCTCCATTGGAGGATCAATCAATTTCCTCTGCACTATAATTAATAGGCGCCCCCT
CTTAATGACTTGAGACAA--ATTTCCCTTAATTCTTTGGAGAATTTTTTTTACTGCCATT
CTCCTCGTTCTCTCCCTTCCAGTTTTTGCTGGAGGAATTACCATGTTACTGACTGATCGA
AATTTTAATACAAGATTTTTCCACCCTAATGGAGGGGGGGATCCTGTTCTTTTTGTTCAT
CTTTTT----------
>Acoela_Isodiametra_sp4_IDUJ11_167_COI
AACACTTTATTTTTTCCTAGGTGCCTGAGCAGGCATTATCGGTACTATGTTGAGAGTTTT
AATCCGGATAGAACTCCGAATATCGGGAGG------AAATCTTATTTCAGAAAAAATTTA
CAATGTCGTTATTACTTCTCACGGTTTAATTATAATCTTTTTTTTTGTTATGCCCGTTAT
AATGGGGGGATTTGGAAATTGAATTATTCCCCTCATACTAGGAAGAGCAGATATGGCCTT
TCCTCGACTAAACAATTTTTCCTTTTGGTTATTACCTCCAAGATTTTCTCTTCTTCTCCT
GAGTAGGGTGACTGAGAGAGGAGTGGGGGGTGGTTGAACCATTTACCCCCCAATAAGAGA
TATTTTAGGCCAACCAGGTTGAAGAATGGATTTAGCTATTTTTAGGCTCCATATCGCTGG
AGCTTCCTCCATTGGAGGATCAATCAATTTCCTCTGCACTATAATTAATAGGCGCCCCCT
CTTAATGACTTGAGACAA--ATTTCCCTTAATTCTTTGGAGAATTTTTTTTACTGCCATT
CTCCTCGTTCTCTCCCTTCCAGTTTTTGCTGGAGGAATTACCATGTTACTGACTGATCGA
AATTTTAATACAAGATTTTTCCACCCTAATGGAGGGGGGGATCCTGTTCTTTTTGTTCAT
CTTTTT----------
>Acoela_Mecynostomum_lutheri_IDUJ13_416_COI
ATCTCTCTATTTAATTTTTGGGGCATGAGCAGCCATTATTGGAACCACCATAAGTGTCAT
TATTCGAATGGAGCTTCGAAGAGGGGGGGA------CAATTTCATTACTGAAAAATCTTA
TAATGTTATTATTACTGCTCACGGTCTAATTATAATTTTCTTTTTTGTTATGCCGGTAAT
AATGGGGGGGTTTGGAAATTGAATTATTCCCCTTATTTTGGGGAGGGTAGATATAGCTTT
CCCCCGGTTGAATAATTTTTCTTTTTGGTTGCTGCCCCCCAGATTGAGTTTACTTCTTCT
TAGAAGACTAACAGAAAGAGGGGTGGGAGCAGGCTGAACTATTTACCCCCCAATAAGTGA
TTTAATGGGGCAACCCGGTTGAAGTATGGATTTGGCCATTTTTAGCTTACATATTGCAGG
AGCTTCCTCCATTGGGGGGTCAATTAATTTTGTTTGTACAATAATTAATTGTCGTAGAAG
GGGGATAACTTGAGATTA--TCTCCCCCTCATTCTTTGAAGTATTTTTTTTACCGCTATT
TTATTAATTTTATCTCTACCAGTCTTTGCGGGGGGATTAACCATGTTATTAACAGATCGA
AATTTTAATACTAGATTTTTCCACCCCAATGGTGGTGGGGACCCCGTATTATTTGTTCAT
TTATTT----------
>Acoela_Mecynostomum_filiferum_IDUJ14_071_COI
AACTCTTTATTTCGTCTTTGGCATGTGGGCAGGTGTAGTTGGGACACTTTTGAGACTTTT
TATTCGTTTAGAATTACGATTTCCTGGTGG------AAATATTGTAATAGAAAATACATA
TAATGTAATCATTACTGCCCATGGATTAATTATAATTTTTTTTTTTGTAATACCCATTCT
AATGGGAGGTTTTGGTAATTGACTTCTTCCCCTTCTTTTAGGATGTGCCGATATGGCGTT
TCCTCGGCTGAATAATCTTTCTTTTTGATTTCTCCCTCCGAGATTTTTTTTACTTATCCT
AAGAAGGTTATCAGAAGTAGGGGTGGGAACGGGATGAACCCTCTATCCCCCTCTAAGTGA
TTTAGTGGGACAGCCAGGTAAAAGAGTGGATTTTGCTATTTTCAGTATGCATATTGCCGG
CGCTTCTTCTATTGGGGGCTCAATTAATTTTCTTTGTACGATCATGAATTTACGTTCTCC
ACTCTTAAATTGAGAATC--AATTTCTCTTTTTATTTGGGGAGTTTTTTTTACGGGTATT
TTATTAATTTTCTCTCTTCCAGTTTTTGCTGGAGGAATCACCATATTATTGACCGATCGA
AATTTCAATACTAGGTTCTTCAACCCAAGAGGAGGGGGGGACCCCATTCTCTTTGTTCAT
CTTTTT----------
>Acoela_Pseudaphanostoma_hyalinorhabdoida_IDUJ12_073_GBKF578515
------------------------------------------GACACTACTAAGTGTTCT
AATCCGAGCAGAACTCCGACAACCCGGGTC------CGGTTTAATTACTGAAAAAATCTA
TAATGTAGCCATTACTGCTCATGGTTTAATTATAATTTTTTTTTTTGTAATGCCCGTGTT
AATGGGGGGATTTGGGAATTGACTCCTTCCTTTATTCTTGGGATGCGCA-ACATGGCCTT
CCCCCGATTAAATAATCTTTCTTTTTGACTTCTCCCCCCAAGATTTAGACTTTTATTATT
GAGGAGGGCTGTTGAATCGGGAGTCGGGAGAGGCTGAACCATCTACCCCCCCATAAGAGA
CTTGGTGGGCCAACCCGGGATAAGGGTGGATTTTGCAATTTTCAGATTACATATCGCAGG
AGCTTCTTCTATCGGGGGTTCAATTAATTTTCTTTGCACAATTATTAATTTGCGAAGAAA
GTCTCTTTCCTGGGATGG--AATTTCTCTTTTTGTGTGAAGAATTTTTTTTACCGCCATT
CTCTTGGTTCTGTCCCTCCCAGTTTTTGCGGGGGGAATCACCATGTTATTAACAGATCGA
AATTTTAATACAAGATTTTTTAACCCCGGGGGAGGGGG----------------------
----------------
>Acoela_Pseudaphanostoma_hyalinorhabdoida_IDUJ12_074_GBKF578516
------------------------------------------GACACTACTAAGTGTTCT
AATCCGAGCAGAACTCCGACAACCCGGGTC------CGGTTTAATTACTGAAAAAATCTA
TAATGTAGCCATTACTGCTCATGGTTTAATTATAATTTTTTTTTTTGTAATGCCCGTGTT
AATGGGGGGATTTGGGAATTGACTCCTTCCTTTATTCTTGGGATGCGCAGACATGGCCTT
CCCCCGATTAAATAATCTTTCTTTTTGACTTCTCCCCCCAAGATTTAGACTTTTATTATT
GAGGAGGGCTGTTGAATCGGGAGTCGGGAGAGGCTGAACCATCTACCCCCCCATAAGAGA
CTTGGTGGGCCAACCCGGGATAAGGGTGGATTTTGCAATTTTCAGATTACATATCGCAGG
AGCTTCTTCTATCGGGGGTTCAATTAATTTTCTTTGCACAATTATTAATTTGCGAAGAAA
GTCTCTTTCCTGGGATGG--AATTTCTCTTTTTGTGTGAAGAATTTTTTTTACCGCCATT
CTCTTGGTTCTGTCCCTCCCAGTTTTTGCGGGGGGAATCACCATGTTATTAACAGATCGA
AATTTTAATACAAGATTTTTTAACCCCGGGGGAGGGGGAGATCCTGTTCTTTTTGTTCAT
CTTTTTTGATTTTTTG
>Acoela_Mecynostomum_auritum_IDUJ13_534_COI
----------------------ATTTTTGCTGGTCTCATTGGGGCATTAATGAGCGTTCT
AATTCGTTCAGAATTACGATATCCGGGCTT------TATTTTAATTAATGAGAGAATTTA
CAATGTTTTCATTACCGCTCATGGTTTAATTATAATTTTTTTTTTTGTAATACCTGTCTT
AATGGGCGGTTTCGGTAATTGACTACTTCCCTTAATGCTAGGTTGTGCTGATATAGCTTT
TCCTCGACTCAATAATATATCCTTTTGATTACTTCCTCCAAGATTTAGATTATTAATTTT
AAGAAGATTAGCTGAGACAGGAGCAGGGTGTGGATGAACTCTTTACCCCCCCATGAGGGA
CTTAATCGGACAACCGGGGATGAGTGTTGATTTGGCTATTTTTAGAATACATGTAGCCGG
CGCTTCTTCTATTGGAGCTTCTATCAATTTTTTATGCACCATCATTAATCTACGAAATCC
TTCCATTACTTGAGAAAT--ACTACCTCTTTTTACATTTAGCATATTTTTCACAGCAATT
TTGTTAGTTATTTCATTGCCTGTTTTTGCCGGAGGGATCACGATACTTTTAACAGATCGT
AATTTTAATACTTCGTTTTTTG--------------------------------------
----------------
>Acoela_Philocelis_sp1_IDUJ13_280_COI
-----------TTTTTTTTGGAATTTTTGCTGGTCTCATTGGGGCATTAATGAGCGTTAT
AATTCGTTCAGAATTACGATATCCGGGCTT------TATTTTAATTAATGAGAGAATTTA
CAATGTTTTCATTACCGCTCATGGTTTAATTATAATTTTTTTTTTTGTAATACCTGTCTT
AATGGGCGGTTTCGGTAATTGACTACTTCCCTTAATGCTAGGTTGTGCTGATATAGCTTT
TCCTCGACTCAATAATATATCCTTTTGATTACTTCCTCCAAGATTTAGATTATTAATTTT
AAGAAGATTAGCTGAGACAGGAGCAGGGTGTGGATGAACTCTTTACCCCCCCATGAGGGA
CTTAATCGGACAACCGGGGATGAGTGTTGATTTGGCTATTTTTAGAATACATGTAGCCGG
CGCTTCTTCTATTGGAGCTTCTATCAATTTTTTATGCACCATCATTAATCTACGAAATCC
TTCCATTACTTGAGAAAT--ACTACCTCTTTTTACATTTAGCATATTTTTCACAGCAATT
TTGTTAGTTATTTCATTGCCTGTTTTTGCCGGAGGGATCACGATACTTTTAACAGATCGT
AATTTTAATA--------------------------------------------------
----------------
>Acoela_Childia_nsp_2_IDAWSp_26_GBFR837849
-AGACTATATTTTGTCTTAGGAGTTTATTGTGGACTAGTGGGAACAGTAATAAGGCTTGC
AATTCGAAGAGAACTTCGAACTGAGAGAAT------AAGAATTCTTTCAGAAAGAACATA
CAACGTTTTAATTACAGCCCCCGGTCTTATTATAATTTTTTTCTTTGTAATACCAGTATT
AATAGGGGGTTTTAGGAATTGACTCCTTCCAACTATATTAGGATGTGCTGATATGGCCTG
CCCACGTTTAAATAATTTCTCTATATGA-TGCTCCCACCAAGATTTTCTCTTCTCATCGA
AACAAGGCTTTTAAAAGAAGGGGAAGGATCAGGTTCAACTACTTATCCTCCAATAAGAAG
GCTAATGGGTCAACCTGGAAGAAATGTTGATATTGCCATCTTTAGGCTTCACATTGCATG
AGCTTCCTCCATCGCAAGGACAATTAACTTCTTATGCACTGTAAATAACCTACCATCCTC
TGCTATGGGGTGGGAAAA--AATTCCACATTTTGCGTGAACAGTTTTTTTCACAGCGATT
CTTCACGTACTTTCACTTCCAGTTTTTGCTGGTGGTATCACTATACTCCTTACAGATCGA
AATTTAAATACTTCCTTTTTTGATCCGTCTGGTGGAGGAGATCCAATTCTTTTTGTTCAT
CTGTTT----------
>Acoela_Childia_submaculatum_IDAWHel_02_GBFR837850
-ACTTTATACTTCATTTTTGGAATTTTTTCTGGGTTAGTCGGCACTGTTATAAGTCTTGC
AATTCGAAGCGAGCTTCGAACTGGGAGAGT------TATAATACTGTCCGAAAGAACTTA
TAATGTTCTTATCACTGCCCATGGTTTAATTATAATCTTCTTCTTTGTAATGCCGGTTTT
AATGGGGGGATTCAGGAACTGACTTTTACCACTTATGTTGGGGTGTGCTGACATGGCTTT
TCCGCGTTTAAATAATTTCTCCTTTTGACTCCTGCCGCCAAGATTCTCACTCCTAATTTT
AAGAAGTCTTCTTGAGATGGGAGTTGGTTCCGGTTGAACCCTATATCCACCGATGAGGGG
GCTAATGGGGCAACCAGGCGGAAGAGTGGACTTAGCTATTTTTAGACTCCATGTTGCAGG
GGCTTCCTCCATTGGGAGGAGAATCAACTTCCTCTGTACAGTAATTAATCTCCGGTCTTC
CATAATGAGATGGGAGGA--ATTACCCCTATTTGTTTGGACTATTCTCTTTACTGCCATT
CTCCTGGTTTTATCCTTGCCAGTGTTTGCTGGGGGCATTACGATATTGCTTACAGATCGT
AATTTGAATACTTCATTTTTTGACCCCTCCGGGGGCGGGGACCCTGTCCTATTTGT----
----------------
>Acoela_Isodiametra_sp2_IDUJ10_37_COI
AACTCTTTATTTTCTCTTCGGAACGTGGTCGGGAATTGTCGGTACTGTCCTGAGAGTCAT
AATCCGCCTCCAGCTGAAAAGAGCGGGGGG------GGGCTTTGTTTCCGAAAGTGTTTA
CAACGTTATTATTACTTCCCACGGGCTCATCATAATTTTTTTCTTTGTCATGCCTATTCT
GATGGGGGGATTTGGGAACTGGCTCCTCCCTCTTTACCTCGGATGCGCCGATATGGCCTT
CCCCCGACTCAATAACTTATCATTTTGACTTCTCCCCCCTAGCCTCCTTCTCCTAATCAG
GAGAAGGATAGTGGAAGCAGGAGTTGGAGCTGGTTGAACAATCTACCCCCCCATAAGAGA
TTTGGTGGGGCAACCTGGGAGAAGTGTTGACTTTGCCATTTTCAGTCTCCACATCGCTGG
TGCTTCATCGATTGGAGGCTCTATTAACTTCCTTTGTACCATTTTAAATTTGCGGAATCC
AGCTCTTTCCTGGGATCA--AATTCCCCTTTTTGTGTGAAGAGTTTTTTTTACCGCCATT
CTTCTTGTCCTCTCCCTGCCGGTATTCGCCGGGGGGATCACTATACTTCTCACAGACCGA
AATTTTAACACAGCTTTCTTTGACCCTAGAGGGGGTGGGGATCCTGTCCTCTTTGTCCAC
CTTTTC----------
>Acoela_Mecynostomum_sp5_IDUJ11_388_COI
AACACTATATATTATTTTTGGTGGGTGTTCTGGTCTTCTGGGGAGTATGATGAGATTTCT
TATCCGAAGGGAGTTAAAAAAAAGAGGGGG------GGGAATTCTAAGAGAAACTACTTA
CAATGTTTTGATTACTGCTCACGGATTAATTATAATTTTCTTTTTCGTCATGCCAGTTCT
TATGGGGGGGTTTAGAAATTGACTCCTACCCCTTATGCTTGGGTGCTCGGATATAGCATT
CCCCCGCCTAAATAATTTTTCATTTTGGCTCCTCCCCCCATCTCTTAGCCTCTTGCTTCT
TAGGAGCCTCTCGGAGATGGGAGCGGGACCTGGGTGGACGATCTACCCCCCCATAAGGAG
CTTGGTCGGACAACCTGGCCTAAGGGTGGATCTTGCCATCTTCAGCCTACATGTAGCGGG
GGCCTCCTCCATTGGGAGTAGGATCAACTTTCTATGCACAATCATCAACCTCCGGTACCC
AACTATGGGGTGGGATTT--GCTCCCCCTCTTCATTTGAACAGTATTCTTCACCGCCATT
CTTTTAGTTCTTTCTCTCCCTGTTTTCGCGGGTGGAATCACAATACTTCTCACGGACCGA
AATTTCAATACGTCCTTTTTCGATCCTTCCGGTGGAGGTGACCCAGTTTTGTTCGTACAC
CTCTTT----------
>Acoela_Actinoposthia_sp9_IDUJ11_344_COI
TACTATATATATATTGTTTGGTATTTATTCTGGAATTATAGGAGGAATTATGAGTTTACT
AATTCGGAGAGAACTTCGTCATCCGGGAAT------TAATATTATAAGTGAAAATTCATA
CAATGTTATAGTCACCGCACATGGATTAATAATAATCTTTTTTTTTGTAATACCTATTTT
AATAGGGGGATTTACAAATTGATTACTACCATTAATATTGGGATGTATAGATATAGCATT
TCCAAAATTAAATAATTTTAGGTTTTGACTATTACTTCCAAGTATGTTTTTATTATTATT
AAGTAGTTTAGTAGAAGGTGGAGTTGGAGGAGGATGAACAATTTATCCACCATTAAGTAA
TATTAATTTTCACTCAAGTCAAAGTGTGGATTTGGCTATTTTTAGATTACATTTAGCAGG
AGCAAGTAGAATTGCTGCTTCTATTAATTTCTTAAGAACAATTTTAAATTTACGTAGTCC
AACCATAATATGGGAATT--TATTCCATTATTCTTATGAAGAATCTTTTTTACAGCTATT
TTATTAGTTTTAGCTTTACCTGTTTTAGCAAGTGGTATCACAATATTGTTAACTGATCGT
AATTTTAATACTAACTTTTTTAATCCGATAGGTGGTGGAGACCCGATATTATTTGTACAT
TTATTT----------
>Acoela_Microposthia_listensis_IDUJ11_315_COI
TACTATATATATATTGTTTGGTATTTATTCTGGAATTATAGGAGGAATTATGAGTTTACT
AATTCGGAGAGAACTTCGTCATCCGGGAAT------TAATATTATAAGTGAAAATTCATA
CAATGTTATAGTCACCGCACATGGATTAATAATAATCTTTTTTTTTGTAATACCTATTTT
AATAGGGGGATTTACAAATTGATTACTACCATTAATATTGGGATGTATAGATATAGCATT
TCCAAAATTAAATAATTTTAGGTTTTGACTATTACTTCCAAGTATGTTTTTATTATTATT
AAGTAGTTTAGTAGAAGGTGGAGTTGGAGGAGGATGAACAATTTATCCACCATTAAGTAA
TATTAATTTTCACTCAAGTCAAAGTGTGGATTTGGCTATTTTTAGATTACATTTAGCAGG
AGCAAGTAGAATTGCTGCTTCTATTAATTTCTTAAGAACAATTTTAAATTTACGTAGTCC
AACCATAATATGGGAATT--TATTCCATTATTCTTATGAAGAATCTTTTTTACAGCTATT
TTATTAGTTTTAGCTTTACCTGTTTTAGCAAGTGGTATCACAATATTGTTAACTGATCGT
AATTTTAATACTAACTTTTTTAATCCGATAGGTGGTGGAGACCCGATATTATTTGTACAT
TTATTT----------
>Acoela_Simplicomorpha_gigantorhabditis_IDUJ11_035_COI
TACTATATATATATTGTTTGGTATTTATTCTGGAATTATAGGAGGAATTATGAGTTTACT
AATTCGGAGAGAACTTCGTCATCCGGGAAT------TAATATTATAAGTGAAAATTCATA
CAATGTTATAGTCACCGCACATGGATTAATAATAATCTTTTTTTTTGTAATACCTATTTT
AATAGGGGGATTTACAAATTGATTACTACCATTAATATTGGGATGTATAGATATAGCATT
TCCAAAATTAAATAATTTTAGGTTTTGACTATTACTTCCAAGTATGTTTTTATTATTATT
AAGTAGTTTAGTAGAAGGTGGAGTTGGAGGAGGATGAACAATTTATCCACCATTAAGTAA
TATTAATTTTCACTCAAGTCAAAGTGTGGATTTGGCTATTTTTAGATTACATTTAGCAGG
AGCAAGTAGAATTGCTGCTTCTATTAATTTCTTAAGAACAATTTTAAATTTACGTAGTCC
AACCATAATATGGGAATT--TATTCCATTATTCTTATGAAGAATCTTTTTTACAGCTATT
TTATTAGTTTTAGCTTTACCTGTTTTAGCAAGTGGTATCACAATATTGTTAACTGATCGT
AATTTTAATACTAACTTTTTTAATCCGATAGGTGGTGGAGACCCGATATTATTTGTACAT
TTATTT----------
>Acoela_Simplicomorpha_gigantorhabditis_IDUJ13_100_COI
TACTATATATATATTGTTTGGTATTTATTCTGGAATTATAGGAGGAATTATGAGTTTACT
AATTCGGAGAGAACTTCGTCATCCGGGAAT------TAATATTATAAGTGAAAATTCATA
CAATGTTATAGTCACCGCACATGGATTAATAATAATCTTTTTTTTTGTAATACCTATTTT
AATAGGGGGATTTACAAATTGATTACTACCATTAATATTGGGATGTATAGATATAGCATT
TCCAAAATTAAATAATTTTAGGTTTTGACTATTACTTCCAAGTATGTTTTTATTATTATT
AAGTAGTTTAGTAGAAGGTGGAGTTGGAGGAGGATGAACAATTTATCCACCATTAAGTAA
TATTAACTTTCACTCAAGTCAAAGTGTGGATTTGGCTATTTTTAGATTACATTTAGCAGG
AGCAAGTAGAATTGCTGCTTCTATTAATTTCTTAAGAACAATTTTAAATTTACGTAGTCC
AACCATAATATGGGAATT--TATTCCATTATTCTTATGAAGAATCTTTTTTACAGCTATT
TTATTAGTTTTAGCTTTACCTGTTTTAGCAAGTGGTATCACAATATTGTTAACTGATCGT
AATTTTAATACTAACTTTTTTAATCCGATAGGTGGTGGAGACCCGATATAATTTGTACAT
TTATTT----------
>Acoela_Haplogonaria_viridis_IDUJ07_70_GBFR837860
-AGTCTTTATTTTTTCTTTGGAATTTACTCTGGAGTAATAGGTGGAGTTTTAAGTTTACT
TATTCGAAGAGAGTTGCGACATCCAGGAAT------AAGATTGATAAGAGAAAATTGTTA
TAATATTATCATTACTGCTCATGGTTTAATTATAATTTTCTTTTTTGTAATACCTATCCT
AATAGGAGGGTTTACAAATTGATTATTACCTCTGATATTAGGTTGTAAAGATATAGTTTT
TCCCCGTTTAAACAATTTTAGATTTTGATTGCTTCCTCCTAGAATATTATTACTATTAAT
TTCTAGTTTAATAGAGAGAGGAGTGGGAAGTGGTTGAACAATTTATCCTCCCTTGAGGAA
TATTATTTATCATTCAAGACAAAGAGTTGATTTAGCTATTTTTAGATTACACTTAGCTGG
TATTTCTAGAATTGCTGCTTCAATTAACTTTCTTTGCACAATAATTAATTTTCGTAGGTA
TGATATAAGATGAGAAGA--AATTCCTCTTTTTCTATGGAGAATTTTTTTTACAGCAATC
TTATTAATCTTAGCGTTACCAGTTTTAGCAAGAGGAATTACCATATTGCTAACTGATCGA
AATTTCAATACTAATTTCTTCAATCCTAGTGGGGGTGGAGATCCAGTTTTATTTGTTCAT
TTATTT----------
>Acoela_Haplogonaria_viridis_IDUJ11_076_COI
AAGTCTTTATTTCTTCTTTGGAATGTACTCTGGAACAATGGGTGGAGTATTAAGTTTGCT
CATCCGAAGAGAGTTGCGTCATCCTGGAAT------GAGATTAATAAGAGAAAATTGTTA
TAATATTATTATTACTGCTCATGGTTTAATTATAATTTTCTTTTTCGTAATACCTATCCT
GATAGGGGGGTTTACAAACTGATTATTACCTCTTATATTAGGCTGTAAAGATATAGTTTT
TCCCCGTTTAAACAATTTTAGATTTTGATTACTTCCTCCTAGAATATTATTACTATTAAT
TTCTAGTTTAATAGAGAGAGGAGTGGGAAGTGGTTGAACAATTTATCCTCCTTTAAGGAA
TATTATTTATCATTCAAGACAAAGAGTTGATTTAGCTATTTTTAGATTACACTTAGCTGG
TATTTCTAGAATTGCTGCTTCAATTAATTTTCTTTGTACAATAATTAATTTTCGTAGGTG
TGATATAACATGAGAAGA--AATTCCTTTATTTTTATGGAGAGTTTTTTTTACAGCAATT
TTATTAATTTTAGCATTACCAGTTTTAGCAAGAGGAATTACCATACTGCTAACTGATCGA
AATTTTAATACTAATTTCTTTAATCCTAGTGGGGGTGGAGATCCAATTTTATTTGTTCAT
TTATTT----------
>Acoela_Childia_sp16_IDUJ13_108_COI
AACATTATACCTACTATTCGGGATTTGATCAGCTATTGTTGGAACTTTAATAAGAATTAT
AATTCGCACAGAATTACGTTTTCCTAAACC------ATGATTAATAGATGAAAATTTATA
TAATATTATTATTACAGCTCATGGTTTAATTATAATTTTTTTCTTTGTGATACCTGTTTT
AATGGGTGGGTTTGGAAATTGATTATTACCTTTAATAATAGGTTGTGCAGATATAGCTTT
TCCTCGATTAAATAATTTTAGATTTTGATTATTACCTCCTAGATTACTTTTATTAAGAAT
CAGAAGATTAACAGAAATAGGTGTAGCTACTGGTTGAACCTTATACCCTCCTTTAAGAGA
TATCGTAGGTCAACCTGGAGCTAGAGTAGATTTAGCTATTTTTTCTCTACATATTGCTGG
AGCCTCTTCAATCGGAGGGAGAATTAATTTTTTATGTACAATTACAAGATACCGAAATCC
AGTTATCTGTTGAGATCA--AATTTCACTTTTTGTTTGATCAGTTTTTTTTACATCTATT
TTATTAGTTTTATCTTTACCTGTTTTAGCTGGAGGTATTACTATACTATTAACTGATCGT
AATTTTAATACTAATTTTTTTGACCCATCAGGGGGAGGAGATCCTATTTTATTCGTTCAT
TTGTTT----------
>Acoela_Diopisthoporus_longitubus_IDUJ06_06_GBFR837855
-ACTCTTTATTTTTTATTTGGGTTTTGGGCTGCTTTAATAGGTACTATAATAAGATTATT
AATCCGATCTGAACTACGACAACCTGGTAT---TGGTTTAATTCAAGATGAACAACTTTA
TAATGTTTTAGTAACAGCTCATGCATTAATTATAATTTTTTTTTTTGTAATACCTGTTCT
CATAGGAGGATTTGGTAATTGATTATTACCTTTAATATTAGGTTGTGGAGACATAGCTTT
CCCTCGATTAAACAATTTTTCTTTTTGACTACTTCCTCCTTCTTTAACTTTATTATCTGT
TAGTATATTTACCGAAGTAGGAGCTGGTACAGGATGAACAATTTATCCTCCTTTAAGAGA
TAGAATCTTCCATTCAGGTTCAAGTGTAGATTTAGCTATTTTTAGTTTACATGTAGCTGG
GGCCTCAAGTATTGGTAGGTCTATTAATTTTTTATGTACCATTATTAATTTACGAAGAAT
AAATATAACTTGAGATCA--AGTACCATTATTTATTTGATCTGTTTTAATTACAAGAATT
TTATTAGTTTTATCTTTACCCGTATTAGCGGGGGGTATTACTATATTATTGTTAGATCGA
AATTTAAATACATCATTTTTTGACCCAGCTGGAGGAGGGGATCCTATTCTATTTGTAAAT
TTATTT----------
>Acoela_Diopisthoporus_nsp_IDAWSp_16_GBFR837856
-ACTTTATATTTTATTTTTGGTTTTTGATCAGCATTTATTGGTACTATTTTAAGGATAAT
TATTCGTATAGAACTTCGTCAACCTGGAAT---TGGGTTAATCCAAGACGAACAATTATA
TAATGTTATAGTAACAGCTCATGCATTAATTATAATCTTTTTTTTTGTTATACCTATTTT
AATAGGAGGATTTGGTAATTGATTATTACCTATTATACTAGGTTGTGCTGATATGGCTTT
CCCACGTTTAAATAATTTTTCTTTTTGGCTTTTACCACCTTCTTTAATTTTATTAACAAT
TAGAATATTTGTAGAATCTGGAGTAGGGACTGGTTGAACAATTTATCCCCCTCTAAGTAA
TAGATTTTATCATTCTGGCCCTGGGGTAGATTTAGCAATTTTTAGTTTACATATTGCTGG
AGCTAGGAGAATTGGTGGTTCTATTAATTTTGTTTGTACAATTATTAATTTGCGAAGGCC
AGAAATAACTTGGGATCA--AGTTCCTTTATTTGTTTGATCTGTGTTAATTACTGGGGTT
TTACTAATTTTATCATTACCAGTTTTAGCTGGAGGAATTACTATATTATTAACAGATCGA
AATTTAAATACTTCTTTTTTTGACCCTTCGGGAGGGGGTGACCCTATTTTATTTGTTAAT
CTTTTT----------
>Acoela_Endocincta_nsp_IDAWSp_33_GBFR837857
-ACCTTATACTTTATTTTTGGTATATGATCAGCAGTTTTAGGTGCCAGATTAAGAGTATT
TATTCGTTTAGAGTTACGGGCACCGGGTAA------AGTATTTCAAAGAGAAACTTTTTA
TAATGTAGTTGTTACAGGACACGCATTATTAATAATTTTCTTTTTTGTAATACCTATTTT
AATGGGAGGATTCGGAAATTGACTATTACCACTAATATTAGGATGTCCGGATATAGCCTT
TCCACGTTTAAATAATTTTTCCTTTTGATTACTACCCCCAAGGTTAATTCTTCTAATTTC
AAGAATATTAACAGAAAACGGGGTAGCAACCGGATGAACCATTTATCCTCCATTAAGAGA
CCTATTAGGACAAAATGGACCAAGAGTTGATTTAGCAATTTTTAGACTCCATATCGCTGG
AGCATCATCAATTGGGGGATCAATTAATTTTGTATGTACAATTATCAATCTCCGTTCTCC
TTCAATAAAATGAGATCA--ATTACCATTATTTGTATGATCTGTATTTTTAACAGGAATT
TTATTAATTTTATCATTACCTGTATTAGCGGGTGGAATCACAATATTATTAACAGATCGA
AATTTAAACACAATATTTTTTGACCCCGCTGGAGGTGGAGATCCGATCCTATTTGTACAT
TTATTC----------
>Acoela_Oligofilomorpha_interstitiophilum_IDUJ11_111_COI
AACTTTATATTTTATTTTTGGTATATGATCAGCTATTTTGGGAGCAGTATTAAGAGTGTT
TATTCGATTGGAATTACGTAATCCAGGTAA------ATTATTTAAAAGAGAAATTTTTTA
TAATGTTGTAGTTACTGGACATGCTTTAGTAATAATTTTTTTTTTTGTTATACCTATTTT
AATGGGGGGATTTGGAAATTGATTATTACCTTTAATATTGGGATGTCCTGATATAGCTTT
CCCTCGATTAAATAATTTTTCTTTTTGATTATTACCTCCTAGATTAATTTTATTATTAAT
TAGAATATTAACTGAAAAAGGTGTTGCAACTGGTTGGACATTATATCCTCCATTAAGTGA
TTTATTAGGACAAAGAGGTCCTAGGGTTGATTTAGCTATTTTTAGTTTACATGTAGCAGG
AGCTTCTTCAATTGGAGGATCTATTAATTTTGTTTGTACTATTATTAATTTACGTAATAA
AACAATAAAATGAGATCA--AATTCCTCTATTTGTTTGAGGAGTGTTTTTAACAGGAATT
TTATTAATTTTATCTCTTCCTGTTCTTGCTGGAGGAATTACAATACTATTAACAGATCGT
AATTTAAATACCATATTTTTTGATCCTGCTGGGGGAGGGGATCCTATTTTATTTGTTCAT
TTATTT----------
>Acoela_Solenofilomorpha_pellucida_IDUJ12_090_GBKF578518
TACTTTATATTTTATTTTTGGTATATGATCAGCTATTTTAGGAGGAATTCTAAGAATATT
TATTCGATTAGAATTACGTTACCCTGGTAT------CTTATTTCAAACTGATACTTTTTA
TAATGTTATTATTACAGCTCATGCTTTAATTATAATTTTTTTTTTTGTTATACCTGTATC
AATAGGAGGATTTGGTAATTGACTATTACCCTTAATATTAAATTGCCCGGATATAGCTTT
TCCACGTTTAAATAATTTTTCCTTTTGATTATTACCTCCTAGATTAATTTTATTAACATT
AAGAATATTAACAGAGATAGGAGTTTCAACAGGTTGAACTATATATCCTCCTTTAAGGGA
TCTTATAAATCATAGAAATCCAAGAGTAGATTTGGCTATTTTTAGTCTTCATATTGCTGG
TATTTCTTCAATTGGAAGCTCTATTAATTTTGTATGTACAATTATTAATTTACGAAGCCC
TTTTATAAAATGAGATCA--AGTACCTCTCTTTATTTGGTCAATTTTTATTACTGGTATT
TTGTTAATTTTATCCTTACCTGTTTTAGCTGGAGGTATTACAATATTATTAACTGATCGA
AATTTAAATACAATATTTTTTGATCCTGCTGGAGGAGGAGACCCTATTCTTTTCATTCAT
CTATTT----------
>Acoela_Hallangia_proporoides_IDUJ06_14_GBFR837858
-ACATTATATTTTATTTTTGGGATTTGATCTGCTGTAGTTGGAACAGTTTTAAGTTTATT
AATTCGAATAGAGTTGCGTTCTCCAGGAGG------GTTTTTTAAAAATGAAAATTTTTA
TAATGCTATTATTACTGGACATGCTCTTATTATAATTTTTTTTTTTGTTATGCCTGTTTT
GATAGGGGGGTTTGGAAATTGACTTTTACCTTTATTTTTAGGATGTCCAGATATAGCTTT
TCCTCGTTTAAATAATTTTTCTTTTTGATTATTACCTATAAGTTTATCATTATTAGTTCT
TAGAATATTAGTTGAACTTGGAGTTGGAGCAGGTTGAACTATTTATCCCCCTATAAGAGA
TTTAATTGGACAACCTGGTCCTAGAGTAGATTTAGCAATTTTTAGATTACATATTGCTGG
AGCTTCAAGAATTGGGGGATCTATTAATTTTATTTGTACAATTATTAATTTTCGTAATAA
ATATAAAAGATGAGATCA--ATTATCTTTATTTGTTTGATCAGTATTTATTACTGGTATT
TTATTAGTTCTTTCTTTACCTGTTTTAGCTGGGGGAATTACTATATTATTAACTGATCGT
AATTTAAATACTGCTTTTTTTGATCCTTCTGGAGGGGGGGATCCAGTTTTATTTGTTCAT
TTATTT----------
>Acoela_Solenofilomorpha_longissima_IDUJ13_443_COI
AACATTATATTTCATTTTTGGAGCTTGATCAGCTATTATTGGAACAATTTTAAGAATCTT
TATCCGAATAGAATTACGTTATCCAGGAAA------ATTATTCAACAGAGAAGTATTTTA
TAATGTAACTATTACAGCTCACGCTTTAATTATAATTTTCTTTTTCGTAATACCCGTATT
AATAGGAGGGTTCGGAAACTGATTACTTCCCCTAATATTAGGGTGCCCCGATATAGCTTT
CCCACGACTAAATAACTTCTCATTTTGACTCCTTCCTCCAAGACTCATTTTATTAATTTT
AAGCATACTTACTGAAACAGGAGTTGGAACAGGATGAACAATATACCCCCCCTTAAGAGA
TCTAACTAGACATGGAGGACCCAGAGTAGATTTAGCCATCTTTAGACTCCACATTGCAGG
AGCTTCCTCAATCGGGGGATCTATTAATTTTGTATCTACTATTATTAATTTACGAAATGA
AAAAATAAAATGAGATCA--ACTACCTTTATTTATTTGAGCCGTTTTCATTACCGGAATT
TTACTTATTCTATCTCTCCCAGTATTAGCCGGAGGAATCACCATATTATTGACAGATCGA
AACCTAAATACAATATTTTTTGATCCATCTGGAGGTGGAGATCCAATCTTATTTGTCCAC
CTTTTT----------
>Acoela_Solenofilomorpha_longissima_IDUJ13_478_COI
AACATTATATTTCATTTTTGGAGCTTGATCAGCTATTATTGGAACAATTTTAAGAATCTT
TATCCGAATAGAATTACGTTATCCAGGAAA------ATTATTCAACAGAGAAGTATTTTA
TAATGTAACTATTACAGCTCACGCTTTAATTATAATTTTCTTTTTCGTAATACCCGTATT
AATAGGAGGGTTCGGAAACTGATTACTTCCCCTAATATTAGGGTGCCCCGATATAGCTTT
CCCACGACTAAATAACTTCTCATTTTGACTCCTTCCTCCAAGACTCATTTTATTAATTTT
AAGCATACTTACTGAAACAGGAGTTGGAACAGGATGAACAATATACCCCCCCTTAAGAGA
TCTAACTAGACATGGAGGACCCAGAGTAGATTTAGCCATTTTTAGACTTCACATTGCAGG
AGCTTCCTCAATCGGGGGATCTATTAATTTTGTATCTACTATTATTAATTTACGAAATGA
AAAAATAAAATGAGATCA--ACTACCTTTATTTATTTGAGCCGTTTTCATTACCGGAATT
TTACTTATTCTATCTCTCCCAGTATTGGCCGGAGGAATCACCATATTATTGACAGATCGA
AACCTAAATACAATATTTTTTGATCCATCTGGAGGTGGAGATCCAATCTTATTTGTCCAC
CTTTTT----------
>Acoela_Solenofilomorpha_pellucida_IDUJ12_089_GBKF578517
AACCCTTTATTTTATTTTTGGAGGTTGGAGTGCTATTGTAGGAACCATGCTCAGATTAAT
CATCCGTACAGAATTACGTAATCCAGGAGT------TTTTTTTGAAAGAGATGTTTTTTA
TAATGTTATTGTTACAGCTCACGCACTCATTATAATTTTTTTTTTCGTTATGCCTGTCTT
AATAGGAGGTTTTGGAAATTGATTACTACCATTAATACTAGGATGTCCAGATATAGCTTT
CCCACGATTAAATAATCTTTCTTTTTGACTCCTCCCTCCTAGATTAATCCTTTTAACTTT
AAGTATATTTACAGAGATGGGGGTGGGAACTGGATGAACATTATACCCCCCCCTCAGAGA
TGTAATAAGACAAAATGGACCTAGAGTAGACTTGGCCATTTTTAGTCTCCATATTGCTGG
AGCTTCCTCTATTGGAGGATCAATTAATTTCGTATCTACAATCATTAATTTACGAAGGGG
GGGAATAAAATGAGATCA--ATTACCATTATTTATTTGAGCTGTTTTTATTACGGGTATT
TTATTAATTTTTTCATTACCGGTATTAGCAGGGGGAATCACAATGTTATTAACAGATCGA
AATTTAAATACTATATTTTTTGACCCCGCGGGGGGAGGAGATCCAATCTTATTTGTTCAT
TTATTT----------
>Acoela_Solenofilomorpha_nsp_2_IDUJ08_05_GBFR837900
-ACGTTCTATTTTTTATTTGGTACTTGGTCTGCTATTTTAGGAACAATTTTAAGGTTGTT
TATCCGATTAGAACTACGATCCCCCGGAAG------ATTTTTTAAAAATGAAAGGTTTTA
TAATTCAGTGATTACTGCTCATGCTTTAATTATAATTTTTTTCTTTGTTATGCCTATTCT
TATAGGTGGTTTTGGTAATTGACTTTTACCTTTAATACTGGGATGTCCAGATATAGCTTT
TCCTCGGATAAATAATTTTTCTTTTTGATTATTACCTCCTAGATTAACTTTACTAAGTAT
TAGATTATTTTTGGAG---GGAGTATCAACTGGATGAACGATTTATCCTCCTTTAAGGGA
TTTGATAAGACAAAACGGTCCTAGAATAGATTTAGCTATTTTTAGTCTTCATATTGCTGG
GGCTTCTTCAATTGGGGGAAGTATTAATTTTGTATGTACGATTATTAATCTTCGAAGAAA
AAATATAAAATGAGATCA--GCTACCTTTATTTATTTGAAGTGTATTTATTACTAGAATT
TTATTAATCTTATCTCTTCCAGTACTTGCGGGAGGTATTACAATATTGTGAACAGACCGA
AATTTAAATACTTCGTTTTTTGATCCTTCGGGGGGAGGAGATCCTATTTTA---------
----------------
>Acoela_Solenofilomorpha_nsp_IDUJ08_74_GBFR837901
-ACATTTTATTTTTTATTCGGTACCTGGTCTGCTATTTTAGGGACAGTTTTAAGACTTTT
TATTCGACTAGAATTACGATCTCCAGGAAG------GTTTTTTAAAAATGAAAGATTTTA
TAATTCAGTTATTACTGCTCACGCTTTACTTATAATTTTTTTTTTTGTTATACCTATTTT
AATAGGTGGTTTTGGTAATTGACTTTTACCTCTTATGTTGGGGTGTCCTGATATGGCCTT
CCCACGTCTTAATAATTTTTCTTTTTGGCTACTACCCCCTAGATTAACTCTTTTGAGAGT
AAGATTATTTTTAGAG---GGTGTTTCTACTGGATGGACAATTTACCCTCCTTTGAGTGA
TTTAATAAGTCAAAATGGTCCTAGAATAGACTTAGCTATTTTTAGTCTACACATTGCAGG
AGCATCTTCCATTGGAGGTAGAATTAATTTTGTTTGTACTATTATCAACCTTCGGAGAAA
AAACATAAAATGGGACCA--ATTACCTCTTTTTATTTGAAGAATTTTTATTACCAGAATT
CTGTTGATTTTGTCTTTACCAGTTCTTGCAGGTGGAATTACTATATTATTAACAGATCGT
AATTTAAATACTTCTTTTTTTGATCCCTCAGGCGGGGGGGATCCTATTTTATTCGTTCAT
TTATTC----------
>Acoela_Hofstenia_miamia_IDUJ05_34_GBFR837865
-ACATTATATATAATATTTGGTATTTGATCCGCTATTGTTGGGTCTACTATAAGTTTAAT
AATTCGTTTAGAATTACGTTCTCCAGGAAG------ATTTTTCCAAAACGATAATTTTTA
TAATGTAATTATTACTGCTCATGCTCTTATTATAATTTTTTTTTTTGTTATACCAATTCT
AGTGGGGGGATTTGGTAATTGATTAGTACCATTAATAATTGGTAGACCAGATATAATTTT
TCCTCGTATAAATAATATATCTTTTTGACTTTTACCCCCAAGTATAATTTTATTAATAAT
AAGAATATTTACTAATAATGGTGTTGCTACTGGTTGAACTTTATACCCCCCATTAAGAGA
TTTAATTAGGCAAAATTCATCAAGGGTTGATTTAGCAATTTTTAGTTTACACATTGCAGG
AATTTCTTCTATTATAGCTTCAATTAATTTTTGTACCACAATTGTTAATATACGTAATGA
AAATATAGAATGAGATAA--AGTTCCTTTATTTGTATGATCTATTTTAATTACTAGTATT
TTATTAATTTTAGCTTTACCTGTATTAGCTGGGGGAATTACTATATTGTTAACTGATCGT
AATTTAAATACCATATTTTTCGACCCCTCAGGAGGGGGGGACCCTATTTTATTTGTTCAT
TTATTT----------
>Acoela_Hofsteniola_pardii_IDAWSp_08_GBFR837866
-ACACTTTATTTCATATTTGGTATTTGATCAGCTATTGTTGGATCAACTATAAGATTAAT
AATTCGATTAGAATTACGTAATCCAGGTAG------ATTTTTTAATGATGATGTATTTTA
TAATGTTATTATTACAGCTCATGCTTTAGTAATAATTTTTTTTTTTGTTATGCCAATTTT
AGTAGGAGGATTTGGAAATTGATTAGTTCCTTTAATAATTGGAAGACCTGATATAATTTT
CCCTCGTATAAATAATATATCATTTTGATTATTGCCCCCAAGAATAATTTTGTTATTAAT
AAGTATATTTACGGGAGAAGGAGTGTCAACTGGATGAACATTATATCCACCATTAAGAGA
TTTAATTAGACAAAATTCTGCTAGTGTTGATTTGGCAATTTTTAGTTTACATATTGCAGG
TATATCTTCTATTATAGCTTCAATTAATTTTTGTTGTACTATTATTAATATACGTAGACA
TAGAATGGAATGAGATAA--AATTCCTTTATTTGTTTGATCTATTTTTATCACAAGAATT
TTATTGATTTTGGCTCTTCCTGTTCTTGCAGGAGGTATTACCATATTATTAACTGATCGT
AATTTGAATACTATATTTTTTGATCCTGCAGGAGGAGGAGATCCAATTCTTTTCGAACAT
CTTTTT----------
>Acoela_Hofsteniola_pardii_IDUJ13_131_COI
---------------------TATTTGATCAGCTATTGTTGGATCAACTATAAGATTAAT
AATTCGATTAGAATTACGTAATCCAGGTAG------ATTTTTTAATGATGATGTATTTTA
TAATGTTATTATTACAGCTCATGCTTTAGTAATAATTTTTTTTTTTGTTATGCCAATTTT
AGTAGGAGGATTTGGAAATTGATTATTTCCTTTAATAATTGGAAAACCTGATATAATTTT
CCCTCGTATAAATAATATATCATTTTGATTATTGCCCCCAAGAATAATTTTGTTGTTAAT
AAGTATATTTACAGGAGAAGGAGTGTCAACTGGATGAACATTATATCCACCACTAAGAGA
TTTAATTAGACAAAATTCTGCTAGTGTTGATTTGGCAATTTTTAGTTTACATATTGCAGG
TATATCTTCTATTATAGCTTCAATTAATTTTTGTTGCACTATTATTAATATACGTAGACA
TAGAATGGAATGAGATAA--AATTCCTTTATTTGTTTGATCTATTTTTATCACAAGAATT
TTATTGATTTTGGCTCTTCCTGTTCTTGCAGGAGGTATTACCATATTATTAACTGATCGT
AATTTG------------------------------------------------------
----------------
>Acoela_Hofsteniola_pardii_IDUJ13_424_COI
TACACTTTACATAATTTTCGGAATTTGATCTGCTGTTGCAGGTTCTATAATAAGATTAAT
AATTCGTTTAGAATTGCGAAGTCCTGGTAG------ATTTTTTTATAATGATACGTTTTA
TAATGTTATTATTACTGCTCATGCTTTATTAATGATTTTTTTTTTTGTAATGCCTATTTT
AGTAGGTGGATTTGGTAATTGATTAATTCCATTAATAATTGGTAGACCGGATATAATTTT
TCCACGATTAAATAATATATCATTTTGATTATTACCTCCAAGATTAATTTTATTAACATT
AAGAATATTTACTAATACTGGTGTTTCTACTGGATGAACTTTATATCCTCCCCTAAGAGA
TTTGATTAGTCAAAATTCTCCTAGTGTTGATCTGGCAATTTTTAGACTTCATGTGGCTGG
AGCTTCATCTATTATAGCTTCTATTAATTTTTGTTGTACAATTGCTAATATACGAAATCA
ATGAATTGATTGAGGAAA--AGTTCCTTTATTTGTTTGATCTATTTTAATTACTAGAATT
TTATTAATTCTTTCATTGCCAGTATTAGCTGGTGGTATTACTATACTTTTAACAGATCGA
AATTTAAATACTATATTTTTTGATCCAGCTGGTGGTGGTGATCCTATTCTATTTGTTCAC
CTTTTT----------
>Acoela_Myopea_callaeum_IDMHMc_GBFR837875
-------------ATTTTTGGAATTTGATCAGCCTTAGTGGGAG-AATATTAAGTCTTTT
TATTCGACCTGAATTTCAAACTCCCGGGAG------TTTATTTAAAATAGAAAATTTTTA
CAATACAGTTGTTACAGGTCATGCTTTTATTATAATTTTTTTTTTTGTTATACCAGTTTT
AATTGGAGGTTTTGGAAATTGACTTTTACCATTAATATTAGGATGCCCAGATATAGCCTT
CCCTCGCTTAAATAATTTATCTTTCTGATTATTACCCCCAAGACTAACATTATTAACTAT
AAGAATAATGAGAGACACTGGAGTAGCAACAGGATGAACAGTTTATCCTCCTTTAAGAGA
CTTAATAGGACAACCAGGTCCAAGAGTAGATTTGGGTATTTTTAGACTTCATGTAGCTGG
AGCAGCTTCAATTGGAGGAGCAATTAACTTTGTTTCTACTATTATTAATTTACGAAGAAA
ACATATTAAGTGAGATCA--GTTACCTCTTTTTATTTGATCTATTTTTTTAACAGGAATT
TTATTAATTTTATCTTTACCTGTTTTAGCAGGTGGGATTACAATATTATTAACAGATCGT
AATCTAAATACAATATTTTTTGA-CCTGCAGGGGGGGGGGACCCCATTCTATTTGTACA-
----------------
>Acoela_Pseudohaplogonaria_sp_IDUJ05_02_GBFR837898
-ACATTATATCTTATTTTTGGAATTTTCGCTGGGTTAATTGGGGGAATTTTAAGAATATT
AATTCGGTTAGAGTTGAGTTCCCCTGGGAA---ATTTTCTCTCTTAAGAGAGAATTCTTA
CAATGTGGTAATTACAGCCCATGGATTAATTATAGTTTTTTTTTTTGTAATACCAATTTT
AATTGGAGGATTTGGAAACTGATTAATTCCTTGAATATTAGGGGCTCCAGATATATCTTT
TCCCCGTTTAAATAACTTCTCTTTTTGATTGCTCCTTCCAAGATTTTTATTATTACTCTT
AAGAAGATTAGTTTCCACCGGAGTTGGAACTGGGTGAACAATTTATCCACCATTAAGAAC
CCTAGTAGGTCAACCCGGAATAAGAGTGGATTTAGCTATTTTTAGATTACATATTGCAGG
TATGTCTTCTATTGCTGGTTCTATTAATTTTATCTGCACTATAATTAATCTTCGAGTTTT
TTCAATTAAATGAAGACA--ACTTTCTCTTTTTATTTGAAGAGTTTTTTTTACCACTATT
CTATTAATTTTAGCACTACCAGTATTGGCTGGGGGAATCACAATATTATTAACAGATCGT
AATTTTAATACATTATTCTTTAATCCCATTGGAGGGGGAGATCCGGTTTTATTTGTTCAT
CTATTT----------
>Acoela_Haploposthia_vandula_IDAWBer_12_GBFR837863
-AGTCTTTATTTTTTCCTTGGAGTATGAGCGGGATTATTGGGAATTTTCATAAGATTTGT
TATTCGAATAGAGCTCCGTTCTCCCTCCTC------TTTATTAATTAATGAAAATGAATA
TAATGTTTTAATTACTGCTCATGGTTTAATTATAATGTTTTTTTTTGTTTTACCCATTCT
AATAGGTGGATTTGGAAATTGGTTAATTCCTATAATATTAGGATGTGTTGACATAGCTTT
TCCTCGTCTAAATAATCTTTCATTTTGGTTTATACCTTTTGGTTTTTCACTTTTACTTTT
AAGGAGAATTGTAGAAACAGGGGTGGCAACTGGATGAACTGTTTATCCCCCTTTAAGAGA
TCTTGTGGGACAACCTGGTAAAAGGATAGATTTGGCAATTTTTAGATTACACATTAATGG
TATATCTTCTATTGGGGGCTCTATTAACTTTATTTGTACAATAATTAATAGTCGAAGAGA
ACAGATGAAATGAGATAT--AATTCCTCTATTTCTATGGAGAGTTTTTTTTACTGGAATT
CTTTTAATTCTTGCTATCCCAGTTTTAGCTGGAGGAATTACCATATTACTTACAGATCGT
AATTTTAATACGGCTTTTTTTGACCCCTCTGGGGGAGGGGATCCCATCTTATTTGCTCAC
TTATTT----------
>Acoela_Childia_trianguliferum_IDAWHel_25_GBFR837851
-ACCCTATACTTTGTTTTCGGCGCTGGAGCTGGGTTGTTGGGAACAGTAATGAGGTTAGC
TATTTGAATGGAGCTGCGGAGGAGGGGTCC------CTCCCTTTTTTTTGAGGCTTCCTA
CAATGTTCTCATTACGGCCCACGGGTTAATTATAATTTTTTTTTTCGTAATACCCGTTCT
CATGGGGGGATTTAGTAACTGGCTTCTTCCTATAATAATAGGTTGTGCGGATATGGCCTT
CCCACGTTTGAATAATTTCTCTTTTTGGCTTCTTCCCCCGAGCTTTGCCCTGCTCCTCTT
AAGAAGATTAATTGAGACGGGAGTGGGCGCCGGATGAACAATTTACCCCCCCATAAGGGG
ATTAATGGGCCAGCCGGGGAGGAGAGTTGACTTAGCTATTTTTAGTCTTCATGTTGCTGG
TATCTCTTCAATTGGGAGATCCATTAATTTCTTGTGTACTATTATTAATCTTCGCGCATT
TTCAATCACATGGGAGCT--GGATCCCCTTTTTGTTTGGACAACTTTTTTTCCGGCCACC
CAATTGGTTCTTTCCTTACCAGATTTTGCGGGGGGGATTA--------------------
------------------------------------------------------------
----------------
>Acoela_Isodiametra_sp3_IDUJ10_272_COI
GATATTGTATATAGTAAGGGGCGTTTGAGCTGGAATTATCGGGACGCTTCTAAGCATTTT
AATCCGTAGGGAATTGCGGAGGGGGGGGAG------GAATTTAATCAGGGAGAAAATTTA
TAATGTTGTCATCACTTCCCACGGGTTGATCATAATTTTCTTCTTCGTTATACCTATTAT
AATAGGTGGATTCGGCAACTATCTAATCCCTTTAATAATTGGGAGAGTAGATATGGCATT
TCCTCGACTCAATAATTTTTCATTTTGACTCCTCCCCCCAAGATTCCTACTCCTGTTAAG
GAGTAGGTTGACTGAGGGGGGGGTGGGATCGGGGTGAACGATCTACCCACCGATGAGTGA
CCTTATTGGTCAGCCAGGATGGAGTATAGACTTGGCAATCTTTAGTCTCCATATTGCTGG
AGCCTCCTCGATTGGTGGTTCGATTAATTTCATCTGTACAATAATTAATGCCCGCTCTGC
ATCCATAACATGGATACA--CCTTCCTCTAATCCTTTGGAGGATTTTCTTCACAGGCATC
CTGTTAGTACTATCTCTCCCAGTATTTGCTGGTGGTTTAACTATACTCCTAACTGATCGT
AACTTTAATACATCGTTCTTTTTCCCTGGAGGGGGAGGAGATCCAGTTCTTTTCGTACAT
CTATTT----------
>Acoela_Proporus_bermudensis_IDAWBer_02_GBFR837893
-ACTCTTTACTTTATCTTTGGAGCATTTTCAGGAGTATTAGGAAGATTTATAAGTATCCT
TATCCGGAATGAAATCAAAAATCCGGGAAG------AAGAATTCTCACAGAAACAAGATA
TAATGTTTTAATTACTGCTCATGGTCTTATCATAATTTTCTTTTTTGTCATACCAATCCT
GGTGGGGGGATTCGGAAATTGGCTTATTCCAATAATACTGGGATGTGCAGATATAGCATT
CCCCCGATTAAATAACCTCTCATTCTGACTGCTTCCCCCCAGACTTGGGCTACTAATTCT
CTCCAGCCTAGTTGAGAGGGGTGTGGGAGCCGGCTGAACTGTGTACCCCCCTCTGAGAGA
TTTAGTGGGGCAGCCAGGGAATAGAGTTGATTTCGCTATTTTCTCTTTGCATATTGCAGG
TGCAAGATCCATTCTTGGATCAATTAATTTCATCTGCACGATTATAAATTGTCGAAGACC
GACAATCCGGTGGGAGAA--AGTTCCCCTTTTTATCTGGAGGATTTTTTTTACGGCAATC
TTACTAGTATTGTCCCTCCCAGTACTTGCCGGGGCAATCACAATACTACTCACAGATCGG
AATTTTAATACTTCTTTTTTCGACCCAGCGGGAGGGGGGGATCCTGTTCTTTTTGTGCAC
CTTTTC----------
>Acoela_Proporus_sp_IDUJ05_23_GBFR837894
-ACTCTATATTTTTTGCTCGGAATTTGATCGGGAGTTCTCGGAGCTTTTATAAGGATTCT
CATTTGAAGGGAACTAAAATCTCCCGGCAG------AAATATAGTTTCAGAAAGAATTTA
TAATACTCTAATTACTGCACATGGTTTAATTATAATTTTTTTTATAGTTATACCAGTTCT
TATAGGTGGATTTGGAAATTGATTATTACCACTAATACTAAATAGAGCAGATATAGCATT
CCCTCGCCTAAATAACTTTAGATTTTGATTACTTCCCCCTAGTCTCTTATTTTTATTAAG
AAGGGCATTAGCAGGAAGTGGTGTAGGATCTGGATGAACAATTTATCCTCCTATAAGGGA
TCTTGTGGGTCAACCTAGAATTAGTGTAGATTTAGCTATTTTTTCACTTCACGTAGCAGG
AGCTAGCTCCATTGCGGGTTCTATTAACTTCTTATGTACAATTATAAATTTACGAAGCCC
TTCAATGGGCTGGGAGCT--TCTCCCTCTTTTTATCTGAGCAGTTTTCTTCACAGGGATT
TTATTAGTATTAAGACTTCCAGTACTTGCTGGAGGTATTACTATACTCCTAACAGACCGT
AACTTTAATACTAGCTTTTTTGATCCTGTGGGGGGTGGAGACCCAGTACTATTTGTACAT
CTCTTC----------
>Acoela_Avagina_nsp_IDUJ08_14_GBFR837846
-ACCCTCTATTTTTGAGCCAGCATTTGAGCTGGTCTTGTGGGGACCACAATAAGAATTAT
CATTCGTATGGAACTTCGATATGTTGGAGA------TAATTTTATTACGGAAAAGGCATA
TAATGTCTTGATTACTGCACATGGTCTCCTAATAATTTTCTTTTTTGTCATGCCCGCTAT
GATGGGGGGATTTGGAAATTGGCTTTTACCTCTCATGCTAGGCTGTCCAGATATAATGTT
CCCCCGATTAAATAATTTAGCCTTCTGATTTGTTATTCCTAGGTTACTTCTATTGCTCCT
TAGAAGGGGGACGGAAAGGGGAGTGGGTTGTGGATGAACTCTTTATCCCCCCCTTAGGGA
TTTAGTTGGACAACCGGGTTGGAGAATAGATTTAGCTATTTTTAGAATACATATTGCTGG
AGCTTCCTCTATTGGGAGATCTATTAACTTTCTGTGTACTTTGATCAATGCTCGTCCAGT
AAGTATGCAGTGAGATCA--TTTACCCCTGTTATTGTGAACCGTATTTTTTACGGCCATT
TTATTGGTTTTATCCCTTCCTGTCTTCGCAGGGGGATTAACTATACTTCTCACTGATCGA
AACTTCAATACAAGATTTTTTCATCCTTCGGGGGGAGGTGACC-----------------
----------------
>Acoela_Mecynostomum_tenuissimum_IDUJ14_053_COI
----------TTTTGAGCGAGTATTTGAGCTGGT-TTATGGGTACGACTAT-AGGATTTT
AATCCGAATAGAACTGCGATATATTGGGGA------TAATATAATTACTGAAAAAGCCTA
CAACGTCCTAATTACGGCTCATGGTCTCCTAATGATTTTTTTTTTTGTAATACCGGCTAT
GATGGGAGGATTTGGAAATTGATTGTTACCTCTTATATTGGGTTGTCCAGATATAATATT
TCCTC-ATTAAATAATTTGGCTTTTTGATTGGTCGTACCCAGGTTGTTATTCTTGTTATT
AAGTAGAGGAACTGAAAGAGGAGTATCATGTGGATGAACTCTTTATCCTCCTTTGAGGGA
TTTGTTAGGACAACCAGGATGAAGAATAGATTTGGCTATTTTTAGAATACATTTAGCTGG
TGCTTCTTCCATTGGGAGTTCTATCAATTTTCTTTGTACTCTTATTAATGCTCGAGCTCC
TGGAATAACTTGGGATGT--TTTTCCTCTTTTATTGTGGACCGTATTTTTCACGGCCATT
CTTTTGGTTTTATCTCTTCCTGTATTTGCTGGGGGGTTAACTATGTTATTGACTGATCGA
AATTTTAATACTAGATTTTTCCATCCTTC-------------------------------
----------------
>Acoela_Proaphanostoma_tenuissima_IDAWSp_22_GBFR837892
-------------------------------------------------------ATTTT
AATCCGAATAGAACTTCGATATATTGGAGA------CAATATAATTACTGAGAAAGCCTA
CAACGTACTCATTACGGCTCATGGGCTCCTTATGATTTTTTTTTTTGTAATACCAGCTAT
AATGGGAGGTTTTGGAAACTGATTACTTCCTCTTATATTGGGTTGTCCAGATATGATATT
TCCCCGATTAAATAACTTGGCTTTTTGATTGTTAATTCCCAGGTTGTTGTTCTTGTTGTT
AAGTAGAGGAACGGAAAGGGGAGTATCATGTGGATGAACTCTTTTTCCTCCATTGAGTGA
TTTGTTAGGACAACCAGGATGAAGAATAGATTTGGCTATTTTCAGAATACATTTAGCCGG
TGCTTCTTCCATTGGGAGTTCTATCAATTTTCTTTGTACTCTTATTAATGCTCGAGCTCC
TGGAATAACTTGGGATAT--TTTTCCTCTTTTATTGTGGACCGTATTTTTTACAGCCATT
CTTTTAGTTTTATCTCTTCCTGTATTTGCTGGAGGGTTGACTATGCTATTGACTGATCGA
AATTTTAATACTAGATTTTTCCATCCTTCGGGGGAAGGCGACCCCGCCTTGTTTGTTCA-
----------------
>Acoela_Archaphanostoma_sp_IDUJ14_003_COI
-AACTCTTATTTTATTCAGGGAGTTTGATCGGGAATTATCGGTACTTGGATAAGGGTAAT
AATTCGAACAGAATTACGATACCCGGGGAA------GTCTTTTATGGGGGAAACAACATA
CAATGTGTTAATCACTTCTCATGGCTTGATTATAATTTTTTTTTTTGTAATGCCAGTTTT
AATTGGA-AATTTGGAAACTGATTAATCCCTTTATTTTTGGGTTGTGCA-ATATGGCATT
TCCTCGGTTGAATAATATATCTTTCTGACTTATTCCTCC-AAATTTCTCCTTTTGGTTTC
AAGAAGATTGTCGGAAATGGGTGTAGGTGCAGGTTGAACAATTTACCCCCCACTTAGAGA
TTTAGTGGGACAACCTGGTATAA-AGTGGATTTAGCTATTTTTTCTCTTCATATCGCTGG
AGCTTCCTCAATCGGAGGTTCAATTAATTTCCTCTGCACGATTATCAATCTTCGATCGGC
AAATATACCTTGGGATAG--TATGCCACTCTTTATCTGGAGAATGTTTTTTACTGCTATT
CTTTTAGTTCTTTCACTTCCCGTTTTTGCAGGTGGAATTACAATACTTCTCACTGATCGA
AATTTTAATACAAGATTTTTCAACCCGCAAGGAGGAGGAGATCCTGTTCTTTTTGTTCAT
TTATTT----------
>Acoela_Nadina_sp_IDUJ13_080_COI
CACTCTCTATTTCCTCTTTGGGGGGCTGGCAGGCCTAATCGGCACCTGCCTAAGTATTCT
AATCCGAGCCGAGCTGCGTTACTCCCACAG------AAGGCTTTTCAGGGAATCAGCGTA
TAATGTCATCATCACTAGGCACGGCCTCATTATGATTTTCTTCTTCGTCATACCAGTTCT
GATGGGGGGCTTCGGCAATTGGTTGCTGCCATTAATGTTGGGGTGCCTGGATATAGCCTT
TCCTCGAATAAATAACCTAAGGTTTTGACTACTACCCCCCAGGCTGGGCCTCCTCATCCT
GAGGAGGTTCTCGGAGGCCGGGGTGGGGGCGGGTTGGACCATCTACCCGCCCCTGAGAGA
CTTGGTGGGCCAGCCCGGTAAGAGGGTTGACTTGGCAATTTTCAGACTCCACATTGCGGG
AGTGTCATCCATTGCAGGGTCCATCAACTTCTTGTGCACTATTGTCAACTTGCGCAACCC
CTCTCTTTCTTGGGATAA--GATTCCCCTTTTCATTTGAGCTGTTCTATTTACCGCCATT
CTCCTTGTCCTATCGTTGCCTGTATTCGCCGGAGGTATTACGATGCTCCTCACCGACCGT
AACTTCAACACCTCCTTCTTTGATCCTCCGGTGGGGGG----------------------
----------------
>Acoela_Philocelis_robrochai_IDMHSa_GBFR837886
-------TTTTTTGTTTTTGGTATTTTTCCGGAAATGTGGGGGGGGGTTATCAGGGTTTT
AATTCGTACAGAATTGCGACAACCC-------TTTTTAATTTAATTTTCGAAAAA--CCA
TAAAGTTTTAATTTCTTCTCCAGGGGTGATCAAAAATTTTTTTTTTGTTATGCCTGTTTT
ATTGGGGGGATTTGGCAATTGATTAATTCCTTTAATATTAGGATGTGCTGATATGGCTTT
TCCCCGATTAAATAATTTTACTTTTTGATTTTTACCCCCCAGTTTTTTTTTGTTGGTTAT
GAGAAGCCTTTGCGAAATGGGTGTGGGAGGAGGTTGAACAATCTACCCCCCCATAAGGGA
TTTAATTGGACAACCAGGAATAAGAGTAGATTTAGCCATTTTTAGCTTACATATTGCGGG
AGCTTCCTCTATGGGGGGGCCTATTAACTTTTTATGTACTATAATTAATCTTCGAAACCC
ATCAATAACTTGAGATAA--AGTTCCTCTTTTTATTTGAAGTATTTTTTTTACTGCAATT
TTATGGGTTCTGTCATGGCCGTTTTTGCTTGGGGGTACAACAATGCTTTTACCAGATCGA
AATTTTAATACTTCTTTTTTTGACCC-ACGGGGGGGGGGGACCCAATTTTATTTGGGCA-
----------------
>Acoela_Eumecynostomum_sp3_IDUJ13_270_COImisstanksam
-------------------------TGAGCGGGTGTTTTGGGAGTTCTTCTTAGGTTAGT
CATCCGAAGAGAGCTCCGCTCTCCTGGAAA------TGTAATAATTAATGAAAAGGCCTA
TAATGTCTCCATTACTTCGCATGGACTTATTATGATTTTTTTTTTTGTAATGCCAGTTTT
AATAGGGGGATTTGGAAATTGGCTTCTTCCCCTTATGTTGGGTTGTGCAAATATAGCCTT
CCCTCGTTTAAATAATTTTTCATTCTGACTTCTGCCCCCAAGTTTTTGTTTATTGATTTC
CAGGAAACTGGCGGAAATAGGGGTGGGGAGGGGCTGGACAATTTATCCCCCATTAA-AAA
TCTTGG-GGCCAACCCGGTATGA-AGTTGATTTGGCCATTTTTAAACTCCATATCGCGGG
TGCTTCCTCCATTGGAGGGTCTATTAATTTCCTCTGTACTATTATTAATCTCCGGACTAA
AATAATAAATTGAATA---TTTTATCTCTTTTTGTGTGGAGGGTTTTTTTTACAGC-ATT
TTGTTGGTTCTTTCTCTTCCTGTGTTC-CGGGAGGAATTACAATATTATTGACGGATCGT
AATTTTAATACTAGGTTTTTTAGGCCAGGGGGGGGGGG----------------------
----------------
>Acoela_Paratomella_rubra_IDUJ13_101_COI
TACTCTTTTTTTTTTATTTGGAACTTGGTCAGCTTTAGTTGGTGCAGCGTTAAGTCTTAT
TATTCGTATTGAATTAGGTCGGGTAGGGGC------TGTAATAATAGATGATCAGCTTTA
TAATGTAATTGTAACTGCTCATGCTTTTTTAATGGTTTTTTATTTTGTTATACCTATAAC
TATAGGTGGGTTTGGAAATTGGTTACTTCCTCTTATATTAGGTTGTCCTGATATAGCTTT
TCCACGTTTAAATAATTTTTCTTTTTGATTATTACCACCTAGTTTAGTTTTATTACTTTT
AAGTGGTTTTTTAGAGTCTGGTGTTGGTACTGGGTGGACAGTATATCCTCCTTTAGCTGA
TAATATTTCACATTCTGGAGGTTCTGTAGATATTGCTATTTTTTCATTACACTTAGCTGG
TGCTTCTTCAATTGGTTCAAGTATTAATTTTATTTGTACTATTGTAAATTTACGTAATTA
TAATATAACTTGAACTAT--GTTACCATTGTTTGTTTGATCAGTGTTTCTTACAGCTGTG
TTGTTAATTTTATCATTACCGGTTCTTGCTGGTGGTATTACAATACTTTTAACTGATCGG
AATTTTGGTACTTCTTTTTTTGATCCATCAGGTGGTGGG---------------------
----------------
>Acoela_Archaphanostoma_sp2_IDUJ11_221_COI
GACAATGTACATAGTGTTTGCAATAATAGCGGCATTTATTGGTGGTGGTATGTCTATTTT
TATGAGAATGGAATTAATGGAACCTGGTGT---TCAGTATATGGCTGATGGACATATGTG
GAATGTCTTTACAACTGCTCACGGGCTAATAATGGTTTTCTTTGTCGTTATGCCTGGCCT
TATTGGTGGATTTGGAAATTGGTTTGTTCCTATTATGATCGGAGCCCCAGATATGGCATT
TCCTAGGATGAATAATATTTCATTTTGGTTGTTGCCACCAAGTTTTGTTTTGTTGCTTTT
GTCAGCTGTTGTTGATGGTGGAGCTGGGGTTGGTTGGACTATTTATCCACCTTTATCTAG
TACAGCAGGTTCTCCTGGGATGTCTATGGATTTAGCTATTTTTTCACTTCATTTAGCTGG
GGCTTCATCAATATTAGGTGCTGCAAATTTTATTACTACAATTTTTAATATGCGGGCTCC
AGGTATGACCATGCATAA--AATGCCTTTATTTGTATGGTCTATGTTAGTTACTGCATTT
TTGCTATTGTTGGCTGTTCCAGTTTTAGCAGGTGCAATTACGATGCTCCTAACCGACCGT
AATTTTGGAACTAGTTTCTTTATTCCAGAAGGTGGAGGTGACCCTATTTTGTTTTTACAC
CTTTTT----------
>Acoela_Eumecynostomum_sp6_IDUJ13_510_COI
GACTTTATATCTTATTATAGCTATAGTTGGTGGTATAGTTGGTGGTCTTTTCTCTACATT
GTTAAGGGCCCAGCTTATGCATATTGATGT------ATTTATGGGGAATTATCAACTCTA
TAATGTTTCAATTACTGCACATGCTGTGATTATGGTATTTTTTATGATAATGCCAGGTCT
TATAGGTGGTTTTGGTAATTGGTTTGTTCCTATAATGATAGGTGCGCCGGATATGTCATT
TCCTAGATTGAATAATATTAGTTTCTGGCTTTTATTCTTCTCACTCATAGTGTTGGTATT
ATCTGCATTGATTGGTGAAGGGCCTGGCACTGGTTGGACTTTGTATCCGCCGCTCGCACA
TATTACATTTCATCCAGATGTTTCAATTGATCTAGCAATATTCAGTTTACATTTGGCAGG
TATTTCCTCAATATTGGGTGGCATTAACTTTATTGCAACAATATTTACAATGCGTGCCCC
GGGTATGACTTTATTCAA--AATGCCATTATTTGTATGGTCTATTTTAATTACTGCATTT
TTGATAGTTATGGTTATCCCAGTGATTGCTGGCGTTATTACAATGCTTCTTACTGATAGA
AATTTTGGTACAACATTTTTTGTCCCAGCTGGTGGTGGTGATCCATTATTATTTCAACAC
CTTTTT----------
>Acoela_Mecynostomum_sp13_IDUJ13_501_COI
CTCTTTGTATTTAATACTTGCTTTTGCCTCTGGCATAGTAGGGTTCATTTTTTCTATTAT
GATTCGCATGCAGCTTATGCACATTGATGT------CGTCAATGGAAATTATCAATTTTT
CAATGTGTTGGTTACTGGACATGGATTCATCATGGTGTTCTTTCTTATTATGCCAGCGCT
TATAGGCGGTTTTGGGAATTGGTTCTTGCCACTTATGATCGGTGCGCCGGACATGGCCTT
TCCAAGACTAAATAATGTGAGTTTTTGGTTGCTTTTCTTTTCTTTGGTTCTTTTGGTTAT
TTCAGCCATAACAGGTGAGGGACCTGGGACCGGTTGGACAGTTTACCCGCCTCTGTCAGA
TATTAATTTTCATCCCGGAGTTGCAACTGATATTGCTATTTTTTCAATCCATATGGCTGG
TCTTTCTTCGATTTTTGGATCCATTAATTTCATCGTGACGACGCTTAATATGCGCACAAA
AGGCATGACTCTGTTTCG--CATGCCGCTTTTTGTTTGGTCTATCTTTCTAGTCTCTGTC
ATGGTTATATTGGTTATGCCCGTTCTCGCAGGAACGATAACGATGTTGTTTACTGATAGA
AATTTTGGAACTTCGTTCTTCGTACCATCTGGTGGGGGAGACCCACTGCTGTACCAACAC
CTTTTT----------
