# Supplementary material for: Biodiversity between sand grains: Meiofauna composition across southern and western Sweden assessed by metabarcoding
Source: Biodivers Data J. 2020 Apr 27;8:e51813. doi: 10.3897/BDJ.8.e51813 (PMC7198628; doi:10.3897/BDJ.8.e51813)
Supplement: Supplementary material 10 — Supplemental Data 10 [file bdj-08-e51813-s010.fasta]

>AJ243676_Archotoplana_holotricha
------------------------------------------------------------
----------------------tagtcat-atgcttgtctcaaagattaag-ccatgcat
gtctaagtacaaa-ct---tggtaacagtgaaaccgcg-aatggctcattaaatcagcta
tggtttattagatcat---gtgtccttaattgg--ataactgtagtaattcta-gagcta
ataca-tgcc-----tcgaagccacgacctc-a----------cggaaatggc-gcaatt
attag-atca--aaatca-ac-cgggc---------ttcg------------g-tcacg-
--agat-----------------tctga-tg-actctggataatcttttctgcagatcgc
acgg-cc--ttgtgtcggcgacagatc-ttataaatgtctgccctatca-actttagatg
gtaggttaactgccta-ccatggtgataacgggtaacggggaatcagggttcgattccgg
agagggag-cctgagaaatagctaccacatccaaggaaggcagcaggcgcgcaaattacc
cactcccggca----cggggaggtagtga-caaaaaataacgatacgggactc-att-cg
aggccccgtaatcggaatgagaacac-tttaaatcc-ttt-aacgaggatcaattgg-ag
ggcaag-tctggtgccagcagccgcggtaattccagct-ccaatagcgtatattaaagtt
gttgcagttaaaaagctcgtagttggatctgaggaatag-------attgg-gcgg-ttc
acc------ttcgggag-t---------tactgcc-tgg---tcgtccttaca-------
-c---agccgttggttacctttg-gtgctctttactgagtgttat----tggtgcccggc
gcgattactttgaaaaaattagagtgcttaaagcaggcct-----tgtgcttgtatat-t
gt-tgcatggaataatagaataggacttc---ggt-tct-attttgtt-g-gttttc-gg
a-a------tt-gaagtaa-tgattaacagggattg-ccaggggcatttgtatggtggcg
ctagaggtga---aattcttggaccgccgccagacaacc-taacgcgaaagcatttgcca
agaatgtcttcactaatcaagaacgaaagtcagaggttcgaagacgatcagataccgt-c
ctagttctgaccataaatgatgccaactgaca-atccgagat-g-ttgc-----ttgttc
gacgtctttgggctg-t-accc-gggaaacc--aaagtgtgtaggtcccgggggtagtat
ggt-tgcaagactgaaacttaaaggaattgacggaagggcaccaccaggagtggagcctg
cggcttaatttgactcaacacgggaaaactcacccggcccggacactgtaaggattgaca
gat--taattgctctttctagatcttgtggttggtggtgcatggccgttcttagttggtg
gagtgatttgtctggtcga--ttccgataacgagcgagactgttgcctat-taaataggt
ggtttcg--gagtcttcgggcaa-------------------------------------
-----accttc-actacgac-ttcttagagggatcta--------tgtttttg-agacat
atgata-gagagcaataacaggtctgtgatgccctta-gatgttcggggccgcac-----
----------------------------------gcgcg-ctacactgacggtcacaaaa
ag--tgc---tcctttcccgaaa-gggttgggtaacct--ttgaatgaccgacgtgacag
ggatcgtggtttgcaattttcccacgtgaacgaggaattcccagtaagcgctagtcatta
actagtgttgattacgtccctgccctttgtacacaccgcccgtcgctactaccgattgaa
tggcttagtgaggtcctcggattggtgctagcgg-a--g-tggtc------t------cc
actct----gtgg-gtatcgag-aaga-cgatcaaac-ttggtcatttagaggaag--t-
aaaagtcgtaacaaggtt-tccgt------------------------------------
------------------------------------------------------------
------------------------------------------------------------
------------------------------------------------------------
------------------------------------------------------------
------------------------------------------------------------
-----------
>KC869814_Monocelis_fusca
------------------------------------------------------------
-------------------------tcat-atgc-tgtctcaaaga-taag-ccatgcat
gtctaagtacaca-tt---ttaacaaaatgaaactgcg-aatggctcattaaatcagcta
cggttcctttgataatc-actacagttacttgg--ataactgtggtaattcta-gagcta
ataca-tgca-----acaatgcccaaccctc-a----------cgggaagggt-gcactt
attag-atca--aaacca-ac-cggct---------ttcg------------g-gt-cg-
--aagt-----------------tttga-tg-actctggataatcgtttc----gatcgc
acgg-cc-tttgcgtcggcgacgtttc-tttcaaatgtctgccctatcatactatagatg
gtagataaattgtcta-ccatggtgataacgggtaacggggaatcagggttcgattccgg
agagggag-cctgagaaacggctaccacatccaaggaaggcagcaggcgcgcaaattacc
cactctcaata----cgaggaggtagtga-caaaaaataacgatgcgggactc-aat-cg
aggccccgtaatcggaatgagtacac-tttaaatcc-ttt-aacgaggatcaattgg-ag
ggcaag-tctggtgccagcagccgcggtaattccagct-ccaatagcgtatattaaagtt
gttgcagttaaaaagctcgtagttggatctaaggatttg-------gacgg-atgg-tac
gcc------ttagggtg-t---------aactgtc-tgt---ctggcctacat-------
-t---agtcg-tggaggcctttt-gtgctcttcattgagtgcttt----gggtgcccgac
gaaattactttgagaaaattagagtgcttaaagcaggcat-----aatgcttgcatac-t
gt-tgcatggaataataaaataggagttt---act-tct-attttgtt-g-gttttt-gg
a-a------gt-gaactaa-tgattaaaggggacag-acgggggcatttgtatggaggcg
ctagaggtga---aattctgtgaccgtctccagacaaac-tactgcgaaagcatttgcca
ggaatgttttcattaatcaagaacgaaagtcagaggttcgaagacgatcagataccgt-c
ctagttctgaccataaatgatgccatctagcatttcccggag-t-ttgc-----ttgtac
ga-acttgggagcgg-c-cccc-gcgaaagc--aaagctttcgggttccgggggaagtat
ggt-tgcaaagctgaaacttaaaggaattgacggaagggcaccaccaggagtggagcctg
cggcttaatttgactcaacacgggaaacctcacccggcccggacactgtaatgattgaca
gat--taacagctctttcttgatctggtggttggtggtgcatggccgttcttagttggtg
gagtgatttgtctggttaa--ttccgataacgaacgagactctaccctgc-taaatag--
---tacg--cagataataattat-------------------------------------
-----gtctgt-gct--gac-ttcttagagggactaa--------cggcgttt-agccgt
gtgaga-aagagcaataacaggtctgtgatgccctta-gatgttcggggccgcac-----
----------------------------------gcgcg-ctacactatttacagcaacg
ggtatgc---tcctggttagaaa-tgactgggtaacccgattgaatcgtaaatgtgacag
ggatcgaggtttgcaattatctctcgtgaacgaggaattcccagtaagcgcaagtcatta
acttgtgctgattacgtccctgccctttgtacacaccgcccgtcgctactaccgattgaa
cggtttagtgaggtccttggattgacttggacga-t--g-tggcc------ctcgtggct
acttt----gttt-tggttgaa-aaga-cgatcaaac-ttgatcgtttagaggaag--t-
aaaagtcgtaacaaggtt-gcc--------------------------------------
------------------------------------------------------------
------------------------------------------------------------
------------------------------------------------------------
------------------------------------------------------------
------------------------------------------------------------
-----------
>MF574100_Syndesmis_aethopharynx
------------------------------------------------------------
--------------------------------------------------g-ccatgcat
gt-cgagttcaca-cc-c-ttga-acggtgaaaccgcg-aatggctcattaaatcagcta
tgatttcttagatctta-cac--atttacttgg--ataactgtagtaattcta-gagcta
ataca-tgcc-ca---acaggccgtgatcttta---------ttggtcgcggt-gggttt
atcag-ttca--aaacca-ac-cagttcc-------ttct---------tg---ggctg-
t-cgg------------------tttga-tg-actctggataac-ttc-c--ctgatcgc
atgg-cc--gtgtgccggcgacgtatc-tttcaagtgtctgacctatca-actttcgatg
gtaggtgatatgccta-ccatggtgatcacgggtaacgggggatcagggtctgattccgg
agagggag-ccttagaaatggctaccacatctaaggaaggcagcaggcgcgcaacttacc
cacttgcagtgt-caagcagaggtagtga-cgataaataacaatgtggaactc-ata-tg
aggctccacaattggaatgaatacaa-tctaaatcc-ttt-aatgaggaacaattgg-ag
ggcaag-tctggtgccagcagccgcggtaattccagct-ccaatagcgtatattaaaatt
gttgcagttaaaaagctcgtagttggatctcagg-tcgg--------ggcgtcggg-tgt
aatc-gta----------t------gattattacttgattgcgccgcctcatc-------
-----agctgtttggtttttttaggtgctcttcattgagttgct--ta-aaagacccagc
aatattactttgaaaaaattagagtgctcaaagcaggcca-tta-tgcgcctctatac-t
gt-tgcatggcataacggaataggactcg---ggt-tct-attttgtt-g-gttttcggg
t-ttta-tgcc-tgagtaa-tgattaaaaggagtagaacgggggctaaagtatggtcgcg
ttagaggtga---aattcttggatcgtggccagactaac-tactgcgaaagcatttgcca
aggatgccttcattaatcaagaacgaaagtcagaggttcgaaagcgatcagataccgc-t
ctagttctgaccataaactatgccatctgact-attggaatgga-ctt---------tta
ttgctgttccagcag-t-ccct-gggaaaccttcaagac---aggttctggggggaatat
ggt-cgcaaggctgaaacttaaaggaattgacggaagggcaccaccaggagtggagcctg
cggcttaatttgactcaacacgggaaaactcacccggcccggacactgtgaggattgaca
gat--tgagagctctttcttgattcagtggatggtggtgcatggccgttcttagttggtg
gagtgatttgtctggttaa--ttccgataacgaacgagactctagcctgc-taactag--
---ttga--ctcataacatg-------------tt--------------c--ttcatgtt
tgtgagtaat----a--tac-ttcttagagggattgg-cta------aactca--ttagc
atgaaa-ttgagcaataacaggtctgtgatgccctta-gatgttcggggccgcac-----
----------------------------------gcgcg-ctacactgacagtgtcagaa
agttat---atccttatccgaaa-ggattgggtaatctt-tcgaatcactgtctcgtcag
ggatcagggtttgtaattatcccctgtgaacgaggaattcccagtaagcacacgtcatca
gcttgtgctgattacgtccctgccctttgtacacaccgcccgtcgctactaccgattgga
tggtttagtgaggtcattggatccgggccatctg-g--a-atcca--------ttcaag-
------------------------------------------------------------
------------------------------------------------------------
------------------------------------------------------------
------------------------------------------------------------
------------------------------------------------------------
------------------------------------------------------------
------------------------------------------------------------
-----------
>KC602396_Acrorhynchides_robustus
------------------------------------------------------------
-----------gatcctgccagtagtcat-atgcttgtctcaaagattaag-ccatgcat
gtataagttcacaccc-t-ttga-atggtgaaaccgcg-aatggctcattaaatcagcta
ttgttccttagatctta-catt-gt-tacatgg--ataactgtagtaattcta-gagcta
ataca-tgcc-----attatactctgaccgc-a----------aggaaagggt-ggattt
attag-atca--aaacta-ac-cagtg-c-----ttttgc--------------at-tg-
c-tag------------------tttga-tg-actctggataacttt-tt--ctgatcgc
aaag-cc--ttgtgctagcgacgtatc-tttcaaatgtctgccctatca-actatcgatg
gtaggtgctatgccta-ccatggttatgacgggtaacggggaatcagggttcgattccgg
agagggag-ccttagaaatggctaccacatctaaggaaggcagcaggcgcgcaaattacc
cactctcagct----agaggaggtagtga-cgaaaaataacgatgcaggactc-ttt-cg
aggctctgcaattggaatgagtacaa-tttaaatcc-ttt-aacgaggaacaattgg-ag
ggcaag-tctggtgccagcagccgcggtaactccagct-ccaatagcgtatattaaagtt
gttgcagttaaaaagctcgtagttggatctcaggtggaa-------gtta--gtgg-tca
gtc-aat----tgacgg-t----------accatt-aat-t-ttgcctaa-tc-------
-----agtcgtttgttatcagaa-gtgctgttcactcagtgct---tt-tggtactcggc
acgtttactttgaaaaaattagagtgctcaaagcaggcc---t--tgtgcttgaatag-t
gt-tgcatggaataatggaataggacttc---tgt-tct-attttgtt-g-gttttc-gg
a-a------ta-gaagtaa-tgattaaaagagactg-acgggggcatctgtatggtggtg
ttagaggtga---aattctgtgatcaccgccagacaatc-tactgcgaaagcatttgcca
aggatgttttcattaatcaagaacgaaagtcagaggttcgaagacgatcagataccgt-c
ctagttctgaccataaacgatgccaactgaca-atcagtgagca-tt-------attt-t
ttttctcactggcag-t-cccc-gggaaacctttaagcttataggttctggggggagtat
ggt-tgcaaatctgaaacttaaaggaattgacggaagggcaccaccaggtgtggagcctg
cggcttaatttgactcaacacgggaaaactcacccggcccggacactgtgaggattgaca
gat--tgatagctctttcttgattcggtggatggtggtgcatggccgttcttagttggtg
gagtgatttgtctggttaa--ttccgataacgaacgagactctagcctgc-taaatag--
---tgag-ca-tttatct------------------------------------------
-att-gaatgc-gtt--tac-ttcttagagggattcg-tcg--c----tttta--gcgtc
acgaaa-ttgagcaataacaggtctgtgatgccctta-gatgttcggggccgcac-----
----------------------------------gtgcg-ctacactgacgatatcaatg
ag--tat-atgcctgagtcgaga-ggttcgggaaatctt-atgaattatcgtcatgtcag
ggattggggcttgtaattattccccatgaacgaggaatacccagtaggcgcaagtcataa
gcttgcgtcgattacgtccctgccctttgtacacaccgcccgtcgctactaccgattgaa
tggtttagtgaggcttttggattggcgttgatgt-a--g----------------g--tt
acacta--cgtta-ataccgag-aaga-ttgtcaaac-ttgatcatttagaggaag--t-
aaaagtcgtaacaaggtt-tccgtaggtgaacctgc------------------------
------------------------------------------------------------
------------------------------------------------------------
------------------------------------------------------------
------------------------------------------------------------
------------------------------------------------------------
-----------
>KC602395_Placorhynchus_octaculeatus
------------------------------------------------------------
-----------gatcctgccagtagtcat-atgcttgtctcaaagattaag-ccatgcat
gtataagttcaca-gc-t-taat-acgctgaaaccgcg-aatggctcattaaatcagcta
tggttccttagatctta-catc-ca-tacttgg--ataactgtagtaattcta-gagcta
ataca-cgcc--a--cttaagccccttcctt---------tactggtcggggt-ggattt
attag-aatc-aaaacca-ac-cggca-c-------ttgt--------------gt-cg-
t-agg------------------tttga-tg-actctggataac-tt-tt--ctgatggt
aagg-cc--ttgtgcctaccatgtatc-tttcaaatgtctgccctatca-actttcgatg
gtaggatatttgccta-ccatggttataacgggtaacggggaatcagggttcgattccgg
agagggag-ccttagaaacggctaccacatctaaggaaggcagcaggcgcgcaaattacc
cactctcagca----agaggaggtagtga-cgacaaataacgatgcaggactctata-ag
aggccctgtaattggaatgagaacag-tttaaagca-ttt-agcgaata-caaatgg-ag
ggcaag-tctggtgccagcagccgcggtaactccagct-ccattagcatatattaaagtt
gctgcagttaaaaagctcgtagttggatctcaggcatgg-------ggtca-gtgg-tcc
acc-ttt------ggtg-t---------gactgca-gat-c-accgcctcatg-------
-----agctgcatgtggttgtgt-gtgctcttaattgggtgca---ca-tgatactcagc
acgtttactttgaaaaaatcagagtgctcaaagcaggcc---t--tgtgcttgtatag-t
gt-tgcatggaataataaaataggacttc---gtt-tct-attttgtt-g-gttttc-gg
a-c------ac-gaagtaa-tgattaaaagggacaa-atgggggcatttgtatggtggcg
ttagaggtga---aattcgatgaccgtcgccagacaatc-tactgcgaaagcatttgcca
aagatgttttcattaatcaagaacgaaagtcagaggttcgaagacgatcagataccgt-c
ctagttctgaccataaacgatgccgattgaca-atcagagtctt-tt-------attttt
ttcagactctggcag-t-ccct-gggaaacctttaaatctacaggttctgggggaagtat
ggt-tgcaaggctgaaacttaaaggaattgacggaagggcaccaccaggagtggagcctg
cggcttaatttgactcaacacgggaaaactcacccggcccgaacactgtgaggattgaca
gat--tgatagctctttcttgattcagtgggtggtggtgcatggccgttcttagttggtg
gagtgatttgtctggttaa--ttccgataacgaacgagactctaacctgc-taaatag--
---tcag-ct-ggtat-----------------------------------------cta
tatt-gcctgt--tt--gac-ttcttagagggattgg-ata--t----tttta--atgtc
aagaaa-gtgagcaataacaggtctgtgatgccctta-gatgttcggggccgcac-----
----------------------------------gcgcg-ctacactgacaatagcaata
ag--tat-tcacctgtgctgaaa-ggcttgggtaatctt-acgaaatattgtcatgtcag
ggattggggcttgcaattgttccccatgaacgaggaattcccagtaagcgtaagtcatca
acttacgctgattacgtccctgccctttgtacacaccgcccgtcgctactaccgattgaa
tggtttagtgagatttttggattgaggctggatg-a--g-gagct---------tg--ct
tctcg----ttca-gtcacaag-aaaa-tcatcaaac-ttgatcatttagaggaag--t-
aaaagtcgtaacaaggtt-tccgtaggtgaacctgc-aga-tggatcaa-----------
------------------------------------------------------------
------------------------------------------------------------
------------------------------------------------------------
------------------------------------------------------------
------------------------------------------------------------
-----------
>KC529525_Neodalyellida_sp2_NVS2013
------------------------------------------------------------
---------------ctgccagtaatgat-atgcttgactcaaagattaag-ccatgcat
gtatcagttcacg-cc-c-tagt-acggctaaaccgca-tatggctcattaaatcagcta
tgatttcttagatctta-aat--ccttacttgg--ataactgtagtaattcta-gagcta
ataca-tgcc-aa--cttagcctctggtc-----------ttgt-atcagagc-ggattt
attag-taca--aaacta-ac-cag--ct-------tc------------g---gc-tg-
a-agg------------------tttga-tg-actctggataac-tctac--ctgatcgc
atgg-cc--ttgtgccggcgacgtatc-tttcaagtatctgccctatca-actttagatg
gtaggatatttgccta-ccatggttataacgggtaacggggaatcagggttcgattccgg
agagggag-ccttagaaatggctgctacatctaaggatggcagcaggcgcgcaacttacc
cactgctagtg--g-cagcgaggtagtga-cgaataataacaatacggaactc-ata-tg
aggctccgtaattggaatgagtacaa-tctaaatcc-ttt-aacgaggaacaattgg-ag
ggcaag-tctggtgccagcagccgcggtaattccagct-ccaatagcgtatattaaaatt
gttgcagttaaaaagctcgtagttggatctcaggtagtg--------agtgttggg-tgc
agta-tt-----------t------tgctgtaactcagc-tctcctccttatc-------
-----agaagtttagcaacggttagtgctctttactgagttgct--gg-ctgtgcacttc
attattactgtgaataaatttgagtgctaaaagcaggc-t-at--atcgcctgaaaaa-t
ga-tgcatggaataatggaataagactct---gtg-act-attttgtt-g-gttttc-ag
t-attg-atgc-agagtaa-tgattaaaagaagtagaacgggggctaacgtatggtcgcg
ctagaggtga---aattcatggaccgtgaccagacgaac-tacagcgaaagcatttgcca
aggatgccttcattaatcaagaacgaaagtcagaggttcgaagacgatcagataccgt-c
ctagttctgactataaactatgccaattgagc-attggaaca-t-aca--------tttt
gtttcgttccagcac-t--ccc-agggaaacctataatt---aggttctggggggaatat
gat-cgcaagaaggaaacttaaaggaattgacggaaagacaccacaaggcgtggagcctg
cggcttaatttgactcaacacggggaatctcacctgggcaggacactgtcaggattgaca
gat--tgatagctctttcatgattcggtggatggtggtgcatggccgttcttagttggtg
gagtgatttgtctggttaa--ttccgataacgaacgagactcacgcctgc-taaatag--
---taca--ctcacttt-gt----------gattt--------------cggtcttaatt
gatgagtg--c---t--gac-ttcttagagggattga-tgg------caaatt--gtcat
atgaaa-tggagcaataacaggtctgtgatgccctta-gatgtccagggccgcac-----
----------------------------------gtgcg-ctacaatgacagtggcagag
agtt------tccttggccgaaa-ggtctgggaaatctt--gaaatcactgtcgcgtcag
ggatcagggtttgtaattatcccctgtgaacgaggaatgcctagtaagtgcaagtcatca
acttgtactgattacgtccctgtcttttgtacacaccgcccgtcgctactaccgatt---
------------------------------------------------------------
------------------------------------------------------------
------------------------------------------------------------
------------------------------------------------------------
------------------------------------------------------------
------------------------------------------------------------
------------------------------------------------------------
------------------------------------------------------------
-----------
>KC529524_Neodalyellida_sp1_NVS2013
------------------------------------------------------------
----tg-gtt-gatcctgccagtaatgat-atgcttgactcaaagattaag-ccatgcat
gtatcagttcaag-cc-c-tagt-acggctaaaccgca-tatggctcattaaatcagcta
tgatttcttagatctta-cat--ccctacttgg--ataactgtggtaattcta-gagcta
ataca-tgcc-ca--tcgtgtctttaacc-----------ttctggttagagc-ggtttt
attag-taca--aaacca-ac-cag--cc-------ttc----------gg---gt-tg-
c-agg------------------tttga-tg-actctggataac-t-tac--ctgatcgc
atgg-cc--ttgtgccggcgacgtatc-tttcaagtatctgccctatca-actttagatg
gtaggttatatgccta-ccatggttataacgggtaacggggaatcagggttcgattccgg
agagggag-ccttagaaatggctgctacatctaaggatggcagcaggcgcgcaacttacc
cactgctagtg--g-cagcgaggtagtga-cgaaaaataacaatacggaactc-tta-tg
aggctccgtaattggaatgagtacaa-tttaaatcc-ttt-aacgaggaacaattgg-ag
ggcaag-tctggtgccagcagccgcggtaattccagct-ccaatagcgtatattaaaatt
gttgcagttaaaaagctcgtagttggatctcaggtagtg--------agtgttggg-tgc
agct-tc-----------t------tgctgttactcggc-actcctccttatg-------
-----agtcggatagcagtggctagtgctctttattgagttgct--ag-ctacgcacggc
atgtttactttgaaaaaattagagtgctcaaagcaggc-t-at--attgcctgaataa-t
ta-tgcatggaataatggaataagactct---gct-gct-attttgtt-g-gttttc-ag
taatca-atgc-agagtaa-tgattaaaagaagtagagcgggggctaaagtatggtcgcg
ctagaggtga---aattcttggaccgtggccagactaac-tactgcgaaagcatttgcca
aggatgccttcattaatcaagaacgaaagtcagaggttcgaagacgatcagataccgt-c
ctagttctgactataaactatgccaatttagc-attggaaca-t-tca--------tttt
ttttcgttccagcac-t--ccc-agggaaacct-taatg---aggttctggggggaatat
ggt-cgcaaggaggaaacttaaaggaattgacggaaagacaccacaaggcgtggagcctg
cggcttaatttgactcaacacggggaatctttcccgggcaggacactgtaaggattgaca
gat--tgatagttctttcatgattcggtggatggtggtgcatggccgttcttagttggtg
gagtgatttgtctggttaa--ttccgataacgaacgagactcacgcctgc-taaatag--
---taca--ctcac-at-gt----------ggttt--------------atgccatacgt
gatgagtgact---a--gac-ttcttagagggattga-tgg------caattt--gtcat
atgaaa-tcgagcaataacaggtctgtgatgccctta-gatgtccggggccgcac-----
----------------------------------gtgcg-ctacaatgacagtgacagag
agtc------tccttggccgaaa-ggtccgggtaatctt--ttaatcactgtctcgtcag
ggatcagggtttgtaattatcccctgtgaacgaggaatgcctagtaagtgcaagtcatca
acttgtactgattacgtccctgtcttttgtacacaccgcccgtcgctactaccgatt---
------------------------------------------------------------
------------------------------------------------------------
------------------------------------------------------------
------------------------------------------------------------
------------------------------------------------------------
------------------------------------------------------------
------------------------------------------------------------
------------------------------------------------------------
-----------
>KC529523_Dalyellioida_NVS2013
------------------------------------------------------------
-------------tcctgccagtaatgat-atgcttgtctcaaagattaag-ccatgcat
gtatcagttcaca-cc-c-ttgt-acggtgaaaccgca-tatggctcattaaatcagcta
tgattccttagatctta-cac-cctctacttgg--ataactgtagtaattcta-gagcta
ataca-tgcc-aa--ttaataccgtgtcc-t--------ttatcggatgcggt-ggattt
attag-taca--aaaccg-ac-ctg--ct-------ttt----------ct---gc-ag-
t-agg------------------tttga-tg-actctggataac-tctac--ctgatcgc
atgg-cc--ttgtgccagcgacgtatc-tttcaagtgtctgccctatca-actttcgatg
gtgggttatatgccca-ccatggttataacgggtaacggggaatcagggtttgattccgg
agagggag-ccctagaaatggctgctacatctaaggaaggcagcaggcgcgcaaattacc
cactgctcgtg--agcagcgaggtagtga-cgaaaaataacaatacagaactc-aaa-tg
aggctctgtaattggaatgagaacaa-tttaaatcc-ttt-aacgaggatcaattgg-ag
ggcaag-tctggtgccagcagccgcggtaattccagct-ccaatagcgtatattaaaatt
gttgcagttaaaaagctcgtagttggatctcaggttg-g--------ggtgtcagg-tgt
gtct-ttt----------t------cgacgctaccgggc-atcccgccttact-------
-----agccgttag-ctattgctggtgctctttactgagttgct--ag-taatgcacggc
atgtttactttgaaaaaattagagtgctcaaagcaggc-t-tt--ttcgcctggataa-t
gt-tgcatggaataatggaataaggctct---gcg-act-attttgtc-g-gttttc-gg
t-atat-gtgc-agagcaa-tgattaaaaggagtagaacgggggctaaagtatggccgcg
ctagaggtga---aattcttggaccgtggccagactaac-tattgcgaaagcatttgcca
aggatgccttcattaatcaagaacgaaagtcagaggttcgaagacgatcagataccgt-c
ctagttctgactataaactatgccatctggtt-atttgaacg-t-tta--------atta
tttacgttcaagcca-c--ctc-agggaaaccttgagaa---gggttctggggggaatat
ggt-tgcaaagctgaaacttaaaggaattgacggaagggcaccaccaggagtggagcctg
cggcttaatttgactcaacacgggaaaactcacccggcccggacactgtaaggattgaca
gat--tgatagttctttcatgatttggtggatggtggtgcatggccgttcttagttggtg
gagtgatttgtctggttaa--ttccgataacgaacgagactctaacctgc-taaatag--
---taca--ctcatgcc-tc----------ggctt--------------ttcctaaaggc
agtgagtgata--ca--tac-ttcttagagggattgg-tgg------cttcta--gtcac
atgaaa-atgagcaataacaggtctgtgatgccctta-gatgtccggggccgcac-----
----------------------------------gcgcg-ctacactgatagtggcaaaa
agtt------tccttggccgaga-ggtctgggtaatctt--ggaatcactatctcgtcag
ggatcagggtttgtaattatcccctgtgaacgaggaattcccagtaagcgcaagtcatca
tcttgcgctgattacgtccctgccctttgtacacaccgcccgtcgctactaccgattgaa
tggtttagtgaggtagtcggatcggaggtatggg-a--g-ttttt--------------c
actctt---aata-cagctgag-aaga-ctatcaaac-ttgatcatttagaggaag--t-
aaaagtcgtaacaaggtt-atcgtaggtgaacctgc-aga-tggatc-------------
------------------------------------------------------------
------------------------------------------------------------
------------------------------------------------------------
------------------------------------------------------------
------------------------------------------------------------
-----------
>KC529522_Dalyellioida_houdini
------------------------------------------------------------
------------------ccagtaatgat-atgcttgcattaaggactaag-ccatgcat
gtataagttcaca-cc-t-ttgt-aaggtgaaaccgca-tatggctcattaaatcagtta
taattccttagatctta-tatccctctacttgg--ataactgtagaaattcta-gagcta
ataca-tgcc-c---tcgatgccttagcc-----------ttacggctagggt-ggattt
attag-atca--aaatca-ac-tcg--ta-------cct----------cg-gtgcggc-
a-aga------------------tttga-tg-actctggataac-tctac--ctgatcgc
atgg-cc--ttgtgccggcgacgtatc-ttccaagttgctgccctatca-actttcgatg
gtaggttatatgccta-ccatggttgtaacgggtaacggggaatcagggttcgattccgg
agagggag-ccttagaaatggctgccacatctaaggacggcagcaggcgcgcaacttacc
cactgccagtgt-ggcggcgaggtagcga-caataaataacaatacagaactc-ttt-tg
aggctctgtaattggaatgagtacaa-tttaaatcc-ttt-aacgaggaacaattgg-ag
ggtaag-tctggtgccagcagccgcggtaattccagct-ccaatagcgtatattaaattt
gttgcagttaaaaagctcgtagttggatctggagttgtggtggtcgaggtgtgt------
-cct-tc-----------t------ggactctacccgac-cacccactttctt-------
-----agtcgtag--ct-tagctggtactcttcattgagttgcc--ag-tgatgcacgac
atgtttactttgaaaaaattagagtgcttaaagcaggctc-tt--ttcgcctgtatat-t
tcatgcatggaataataaaacaaggcttc---gtg-acc-attttgtt-g-gttttc-ag
taatta-atgc-gaagcaa-tgattaaaaggagtagaacgggggcaaaagtatagccacg
atagaggtga---aattcgttgaccgtggctagactgcc-tacagcgaaagcatttgcca
agaatgccttcattaatcaagaacgaaagtcggaggttcgaagacgatcagataccgt-c
ctagttccgactataaactatgccaactgacc-atcagagtc-----g--------ataa
acatcactctggcag-t--ccc-agggaaaccttaagtg---aggttctggggggaatat
ggt-cgcaaggacgaaacttaaaggaattgacggaagggcaccaccaggagtggagcctg
cggcttaatttgactcaacacgggaaaactcacccggcccggacactataaggattgaca
gat--tgatagatctttcatgatctagtgaatggtggtgcatggccgttcttagttggtg
gattgttttgtctggttaa--ttccgataacgaacgagactcacacctgc-taaatag--
---taca--ctcatacggca----------taatt--------------ttgcttaccgt
agtgagtgc-----t--tac-ttcttagagggattag-tgg------cttcta--gtcac
atgaaa-ttgagcaataacaggtctgtgatgccctta-gatgtccggggccgcac-----
----------------------------------gcgcg-ctacaatgacagtggcaaaa
agta------acctttcccgaaa-gggctaggcaatctt--tcaatcactgtcgcgtcag
ggatcagggtttgtaattatcccctgtgaacgaggaattcccagtaagcatacgtcatca
gcttatgttgattacgtccctgccctttgtacacaccgcccgtcgctactaccgat----
------------------------------------------------------------
------------------------------------------------------------
------------------------------------------------------------
------------------------------------------------------------
------------------------------------------------------------
------------------------------------------------------------
------------------------------------------------------------
------------------------------------------------------------
-----------
>KC529521_Austradenopharynx_NVS2013
------------------------------------------------------------
-------------tcctgccagtaatgat-atgcttgtctcaaagattaag-ccatgcat
gtataagttcaca-cc-t-ttat-atggtgaaaccgcg-aatggctcattaaatcagcta
ttattccttagatctta-cgt---tatacttgg--ataactgtggtaattcta-gagcta
ataca-cgcc-aa---ttttactggacataaggtttcggcc-aagtgtccagt-gggctt
attag-atca--aaacca-ac-cgg--ct-------ct-----------cg---ggctg-
t-agg------------------tttga-tg-actctggataat-cta-c--ctgatcgc
atgg-cc--ttgtgctggcgacgtatc-tttcaagtatctgccctatca-actgtcgatg
gtgggagctttgccta-ccatggttataacgggtaacggggaatcagggttcgattccgg
agagggag-ccttagaaatggctaccacatctaaggaaggcagcaggcgcgcaaattacc
cacttgcagtgtgcaggcagaggtagtga-caataaataacaatgcagaactc-tta-tg
aggctctgcaattggaatgagacaga-tttaaatcc-ttt-gacaaggatcaattgg-ag
ggcaag-tctggtgccagcagccgcggtaattccagct-ccaatagcgtatattaaaatt
gttgcagttaaaaagctcgtagttggatttcagg-atgg--------aatgtcggg-taa
gccc-att----------a------gggtttaacttgatgaatccacctcgta-------
-----agccggtgagttgcattgatcgctcttaattgag--tgt--cg-gtgtgcacggc
atgtttactttgaaaaaattaaagtgatcaaagcaggcca-tttatgtgtctgaatag-t
gg-tgcatggaataatagaaaaagactct---ggt-act-attttgtt-g-gttttc-ag
t-atta-cacc-agagtaa-tgattaaaaggagtaaaacgggggcagaagtatggccgcg
ttagaggtga---aattcttggaccgtggccagactaac-tactgcgaaggcatttgcca
aggatgctttcattaatcaagaacgaaagtcagaggttcgaagacgatcagataccgt-c
ctagttctgaccataaactatgccaactgacc-atccggtttgt-tta--------ttaa
tagacagcctggcag-t-ccct-gggaaaccttcaagtg---aggttctggggggaatat
ggt-cgcaagtctgaaacttaaaggaattgacggaagggcaccaccaggagtggagcctg
cggcttaatttgactcaacacgggaaaactcacccggcccggacactgtaaggattgaca
gat--tgaaagctctttctagattcggtgattggtggtgcatggccgttcttagttggtg
gagtgatttgtctggttaa--ttccgataacgaacgagactctagcctac-taaatag--
---gtag--ctcataccgta------------gtt--------------c--gcttcggt
aatggg-cct----a--cgc-ttcttagagggattaa-cgg------catcta--gtcgt
atgaga-ttgagcaataacaggtctgtgatgccctta-gatgttcggggctgcac-----
----------------------------------gcgcg-ctacactgagggttgcagaa
aggtatt--gccctactccgaga-ggagcgggaaacctt-actaaaagctctcacgtcag
ggatcagggtttgtaattatcccctgtgaacgaggaattcccagtaagcgcaagtcatca
gcttgcgttgattacgtccctgccctttgtacacaccgcccgtcgctactaccgattgga
tgctttagtgagatccttggaccggaaggctgtg-g--a-gtgg----------gcaact
gctctg---tgct-ctactgga-aaga-ggttcaaat-ttgagtatctagaggaag--t-
aaaagtcgtaacaaggtt-tccgtaggtgaacctgc-aga-tggatc-------------
------------------------------------------------------------
------------------------------------------------------------
------------------------------------------------------------
------------------------------------------------------------
------------------------------------------------------------
-----------
>KC529520_Adenopharynx_mitrabursalis
------------------------------------------------------------
-------------------cagtaatgat-atgcttgtctcaaagattaag-ccatgcat
gtatcagttcaca-cc-t-ttat-atggtgaaaccgcg-aatggctcattaaatcagcta
tgattccttagatctta-cgt---tatacttgg--ataactgtggtaattcta-gagcta
ataca-tgtc-aa---ttatgctggtaacatggtttcggcc-aagttatcagc-gggctt
attag-atca--aaacca-tc-cag--tc-------tt-----------cg---gactg-
t-cgg------------------tttga-tg-actctggataat-cta-c--ctgatcgc
atgg-cc--ttgtgctggcgacgtatc-tttcaagtatctgccctatca-actttcgatg
gtgggagctttgccta-ccatggtgataacgggtaacggggaatcagggttcgattccgg
agagggag-ccttagaaacggctaccacatctaaggaaggcagcaggcgcgcaaattacc
cacttgcagtgcgcgggcagaggtagtga-cgaaaaataacaatgcagaactc-att-tg
aggctctgtaattggaatgagatgga-tttaaatcc-ttt-aacgaggatccattgg-ag
ggcaag-tctggtgccagcagccgcggtaattccagct-ccaatagcgtatattaaaatt
gttgcagttaaaaagctcgtagttggatttcagg-atgg--------aatatcggg-tgg
gtcc-att----------a------gggctcaactcgattaatccacctcgta-------
-----agccggtgagctatattgatcgctcttcattgag--tgt--ca-atatgcacggc
atgtttactttgaaaaaattagagtgctcaaagcagacca-tttatgtgtctgaatag-t
gg-tgcatggaataatggaaaaggactct---ggt-act-attttgtt-g-gctttc-ag
t-atta-cacc-agagtaa-tgattaaaaggagtagaacgggggcagaagtatggccgcg
ctagaggtga---aattcttggaccgtggccagactaac-tactgcgaaggcatttgcca
aggatgctttcattaatcaagaacgaaagtcagaggttcgaagacgatcagataccgt-c
ctagttctgaccataaactatgccaactgacc-atccggtttgt-tta--------ttat
tagacagcctggcag-t-ccct-gggaaaccttcaagtg---aggttctggggggaatat
ggt-cgcaagtctgaaacttaaaggaattgacggaagggcaccaccaggagtggagcctg
cggcttaatttgactcaacacgggaaaactcacccggcccggacactgtgaggattgaca
gat--tgaaagctctttctagattcggtggatggtggtgcatggccgttcttagttggtg
gagtgatttgtctggttaa--ttccgataacgaacgagactctagcctac-taaatag--
---gtaa--cccatgccgtg------------gtt--------------c--gcttcggt
agtggg-ctt----a--cac-ttcttagagggattgg-cgg------catcta--gtcgc
atgaga-ttgagcaataacaggtctgtgatgccctta-gatgttcggggctgcac-----
----------------------------------gcgcg-ctacactgacagtctcaaaa
agataat--gcccttctccgaga-ggagcgggaaatctt--ttaaaggttgtcacgtcag
ggatcagggtttgtaactatcccctgtgaacgaggaattcccagtaagcgcaagtcatca
gcttgcgctgattacgtccctgccctttgtacacaccgcccgtcgctactaccgattgga
tgctttagtgagatcctcggaccggagagctgtg-g--a-ggac----------gcaagt
tttccg---agct-attctgga-aagt-ggatcaaat-ttgagtatctagaggaag--t-
aaaagtcgtaacaaggtt-tccgtaggtgaac----------------------------
------------------------------------------------------------
------------------------------------------------------------
------------------------------------------------------------
------------------------------------------------------------
------------------------------------------------------------
-----------
>KC529519_Solenopharyngidae_NVS2013
------------------------------------------------------------
---ctg-gtt-gatcctgccagtaatgat-atgcttgtctcaaagattaag-ccatgcat
gtacaagttcaca-cc-t-tctt-atggtgaaaccgcg-aatggctcattaaatcagcta
taattccttagatctta-cgt---tttacttgg--ataaccgtggtaattcta-gagcta
ataca-tgtc-aa---cgatgcttgagatatcactttcgtg-aaatcttgggt-ggactt
attag-atc---aaatca-ac-cga--tg-------tt-----------tc---ggcat-
cgtta------------------tttga-tg-actctggataat-ttg-c--ctgatcgc
atgg-cc--ttgagctggcgacgtatc-tttcaagtatctgccctatca-actat-gatg
gtaggagacttgccta-ccatggtgataacgggtaacggggaatcagggtttgattccgg
agagggag-ccttagaaacggctaccacatctaaggaaggcagcaggcgcgcaaattacc
cacttgcagtgcgcgagtagaggtagtga-caataaataacaatgcagaactc-ttt-tg
aggctctgcaattggaatgagacaga-tttaaatcc-ttt-aacgaggatcaattgg-ag
ggcaag-tctggtgccagcagccgcggtaattccagct-ccaatagcgtatattaaaatt
gttgcggttaaaaagctcgtagttggatatcagg--tag--------aatgtcgta-tgg
gtcc-tta----------t------gggcttatg-cgatgaatctacctcgtc-------
-----agccgatttgtgtgattgttgctcttaattgatg--tga--ta-atacgcgcggc
atgtttaccttgaaaaaattagagtgcttaaagcagacca-ttaatgagtctgcatag-t
gg-tgcatggaataatggaataagactct---gga-tct-a-tttgtt-g-attct---g
c-att--cacc-agagtaa-tgattaaaaggggtagtacgggggcagaagtatggccgcg
ctagaggtga---aattcttggaccgtggccagactaac-tactgcgaaagcatctgcca
agtatgctttcattaatcaagaacgaaagtcagaggttcgaagacgatcagataccgt-c
ctagttctgaccataaactatgccaactgact-at-tagtccgt-ttt--------cata
aaaacggcatggcag-t-cccc-gggaaaccttcaagtg---aggttccggggggaatat
ggt-cgcaaggctgaaacttaaaggaattgacggaagggcaccaccaggagtggagcctg
cggcttaatttgactcaacacgggaaaactcacccggcccggacactgtgaggattgaca
gat--tgaaagctctttctagattcagtggatggtggtgcatggccgttcttagttggtg
gagtgatttgtctggttaa--ttccgataacgaacgagactcaagcctac-taactag--
---gtag--catactagggg------------ctt--------------t--aaaccact
agtgta-gct----a--cgc-ttcttagagggattgg-cgg------cattta--gtcgc
atgaga-ttgagcaataacaggtctgtgatgccctta-gatgtccggggctgcac-----
----------------------------------gcgcg-ctacaatgacagtctcagaa
agaagat--acccttctccgaga-ggagtgggaaatctt-ttgaaaggctggcacgtcag
ggatcagggtttgtaattataccctgtgaacgaggaattcccagtaagcgcaagtcatca
gcttgcgctgattacgtccctgccctttgtacacaccgcccgtcgctactaccgattgga
tgctttagtgagatattcggaccaagaggccg-g-a--g-acgcc--------tttaggt
gtttcc---atcc-tctctgga-aaga-agatcaaat-ttgagtatctagaggaag--t-
aaaagtcgtaacaaggtt-tccgtaggtgaacctgc-aga-tggatca------------
------------------------------------------------------------
------------------------------------------------------------
------------------------------------------------------------
------------------------------------------------------------
------------------------------------------------------------
-----------
>KC529518_Wahlia_macrostylifera
------------------------------------------------------------
----tg-gtt-gatcctgccagtactgat-atgcttgtctcaaagactaag-ccatgcat
gt-cgagttcaca-cc-ctttgt-acggtgaaaccgcg-aatggctcattaaatcagcta
tgatttcttagatctta-cac--ttttacttgg--ataactgtagtaattcta-gagcta
ataca-tgcc-ca---acaggccgtgatc-tt----------ttggttgcggt-gggttt
atcag-ttca--aaatca-ac-cag--ac-------ttta---------tt---gtctg-
t-cgg------------------tttga-tg-actctggataac-ttc-c--ctgatcgc
atgg-cc--atgtgccggcgacgtatc-tttcaagtgtctgacctatca-actttcgatg
gtaggtgatatgccta-ccatggttatcacgggtaacgggggatcagggtctgattccgg
agagggag-ccttagaaatggctaccacatctaaggaaggcagcaggcgcgcaatttacc
cacttgcagtgt-caagcagaggtagtga-cgataaataacaatgtggaactc-ata-tg
aggctccacaattggaatgaatacaa-tctaaatcc-ttt-aatgaggaacaattgg-ag
ggcaag-tctggtgccagcagccgcggtaattccagct-ccaatagcgtatattaaaatt
gttgcagttaaaaagctcgtagttggatctcagg-tcgg--------ggcatcggg-tat
aatc-att----------t------gattatcacttgactgcaccgcctcatc-------
-----agtcgtttagttttcttggatgctctttattgaagtgtc--ca-agaaacacgac
aatattactttgaaaaaattagagtgctcaaagcaggcca-tta-tgcgcctctatac-t
gt-tgcatggcataacggaataggactcg---ggt-tct-attttgtt-g-gttttc-gg
t-atta-tgcc-cgagtaa-tgattaacaggagtagaacgggggctaaagtatggtcgcg
ttagaggtga---aattcttggatcgtggccagactaac-tactgcgaaagcatttgcca
aggatgccttcattaatcaagaacgaaagtcagaggttcgaaagcgatcagataccgc-t
ctagttctgaccataaactatgccatctgact-attggaatgga-ctt---------tta
ttgctattccagcag-t-ccct-gggaaaccttcaagag---aggttctggggggaatat
ggt-cgcaaggctgaaacttaaaggaattgacggaagggcaccaccaggagtggagcctg
cggcttaatttgactcaacacgggaaaactcacccggcccggacactgtaaggattgaca
gat--tgagagctctttcttgattcggtggatggtggtgcatggccgttcttagttggtg
gagtgatttgtctggttaa--ttccgataacgaacgagactctagcctgc-taactag--
---tcga--ctcataacatg-------------tt--------------t--atcatgtt
tgtgagtatt----g--tac-ttcttagagggattgg-cta------aactca--ttagc
atgaaa-ttgagcaataacaggtctgtgatgccctta-gatgttcggggccgcac-----
----------------------------------gcgcg-ctacactgacagtggcagaa
agtcat---aaccttgtccgaga-ggattgggtaatctt-tcgaatcactgtctcgtcag
ggatcagggtttgtaattatcccctgtgaacgaggaattcccagtaagcacacgtcatca
gcttgtgctgattacgtccctgccctttgtacacaccgcccgtcgctactaccgattgga
tggtttagtgaggtcattggatccgagtaatctg-g--a-attc---------gtagaa-
--ttgc---gatt-gcttagaa-aaga-cgatcaaac-ttgattatctagaggaag--t-
aaaagtcgtaacaaggtt-tctgtaggtgaacctgc-a----------------------
------------------------------------------------------------
------------------------------------------------------------
------------------------------------------------------------
------------------------------------------------------------
------------------------------------------------------------
-----------
>KC529517_Seritia_elegans
------------------------------------------------------------
-------------tcctgccagtactgat-atgcttgtctcaaagactaag-ccatgcat
gt-cgagttcaca-cc-c-ttgt-acggtgaaaccgcg-aatggctcattaaatcagcta
tgatttcttagatctta-cac--aattacttgg--ataactgtagtaattcta-gagcta
ataca-tgcc-ca---ttaggccgtgatcttt----------ttggttgcggt-gggttt
atcag-ttca--aaacta-ac-cag--cc-------ttta---------tt---ggttg-
t-ctg------------------tttga-tg-actctggataac-ttc-c--ctgatcgc
atgg-cc--ttgtgccggcgacgtatc-tttcaagtgtctgacctatca-actttcgatg
gtaggtgatatgccta-ccatggttatcacgggtaacgggggatcagggtctgattccgg
agagggag-ccttagaaatggctaccacatctaaggaaggcagcaggcgcgcaacttacc
cacttgcagtgt-caagcagaggtagtga-cgataaataacaatgtggaactc-ata-tg
aggctccacaattggaatgaatacaa-tctaaaacc-ttt-aatgaggaacaattgg-ag
ggcaag-tctggtgccagcagccgcggtaattccagct-ccaatagcgtatattaaaatt
gttgcagttaaaaagctcgtagttggatctcagg-tcgg--------ggcatcagg-tat
gatc-att----------t------gattatcacttgactgcaccgcctcatc-------
-----agtcgtttagttttcttgggtgctctttattgtagtgct--ca-agaaacacgac
aatattactttgaaaaaattagagtgctcaaagcaggcca-tta-tgcgcctctatac-t
gt-tgcatggcataacggaataggactc----agc-tct-attttgtt-g-gttttc-gg
t-atta-tg-c-tgagtaa-tgattaacaggagtagaacgggggctaaagtatggtcgcg
ttagaggtga---aattcttggatcgtggccagactaac-tactgcgaaagcatttgcca
aggatgccttcattaatcaagaacgaaagtcagaggttcgaaagcgatcagataccgc-t
ctagttctgaccataaactatgccatctgact-attggaatgga-ctt---------tta
ttgctattccagcag-t-ccct-gggaaaccttcaagac---aggttctggggggaatat
ggt-cgcaaggctgaaacttaaaggaattgacggaagggcaccaccaggagtggagcctg
cggcttaatttgactcaacacgggaaaactcacccggcccggacactgtaaggattgaca
gat--tgagagctctttcttgattcggtggatggtggtgcatggccgttcttagttggtg
gagtgatttgtctggttaa--ttccgataacgaacgagactctagcctgc-taactag--
---tcga--cttataacatg-------------tt--------------t--tacatgct
tgtgagtatt----g--tac-ttcttagagggattgg-cta------aactca--ttagc
atgaaa-ttgagcaataacaggtctgtgatgccctta-gatgttcggggccgcac-----
----------------------------------gcgcg-ctacactgacagtggcagaa
agtctt---aaccttgtccgaga-ggattgggtaatctt-tcgaatcactgtctcgtcag
ggatcagggtttgtaattatcccctgtgaacgaggaattcccagtaagcacacgtcatca
gcttgtgctgattacgtccctgccctttgtacacaccgcccgtcgctactaccgattgga
tggtttagtgaggtcatcggatccgaactgtctg-g--a-attct--------ttagaa-
--tttc---gatg-gtttagag-aaga-cgatcaaac-ttgattatctagaggaag--t-
aaaagtcgtaacaaggtt-tctgtaggtgaacctgc-aga-tggat--------------
------------------------------------------------------------
------------------------------------------------------------
------------------------------------------------------------
------------------------------------------------------------
------------------------------------------------------------
-----------
>KC529516_Pterastericola_psilastericola
------------------------------------------------------------
-aactg-gtt-gatcctgccagtaatgat-atgcttgtctcaaagattaag-ccatgcaa
atataagatcacg-ct-c-atgt-acagcgtatcggtg-gacggctctgtaatacagaca
tgattccttagatctta-cat-cccttacttgg--ataactgtagtaattcta-gagcta
ataca-tgcc-aa--tttatactttgatctt--------ttaatggtcggagt-ggattt
attag-taca--aaacca-ac-ctg--tt-------ttt----------tt---ac-ag-
t-agg------------------tttga-tg-actctggataac-tctac--ctgatcgc
atgg-cc--ttgtgctagcgacgtatc-tttcaagtgtctgccctatca-actttcgatg
gtgggttatatgccta-ccatggttatgacgggtgacggggaatcagggttcgattccgg
agagggag-ccttagaaatggctgctacatctaaggaaggcagcaggcgcgcaacttacc
cactgttactg--t-cagcgaggtagtga-cgataaataacaatacagaactc-tta-tg
aggctctgtaattggattgagtacaa-tttaaatcc-ttt-aacaagg-acaattgg-ag
ggcaag-tctggtgccagcagccgcggtaattccagct-ccaatagcgtatattaaaatt
gttgcagttaaaaagctcgtagttggatctcaggttgtg--------aatgcacgg-tgc
tctt-ttt----------t------tagcgctactgtgt-attccaccttact-------
-----agtcgttag-ctattgctggtgctctttattgagttgct--gg-tgatgcacggc
gtgtttactttgaaaaaattagagtgcttaaggcaggc-t-tt--tatgcttgtataa-t
gt-tgcatggaataatggaatagggctct---gcc-act-attttgtt-g-gttttc-gg
t-aata-tagc-agagcaa-tgattaaaaggagtagaacgggggctgaagtatggtcgcg
ttagaggtga---aattcttggatcgtggccagactaac-tactgcgaaagcatctgcca
aggatgccttcattaatcaagaacgaaagtcagaggttcgaagacgatcagataccgt-c
ctagttctgactataaactatgccaactgacc-atcagaacg-a-ata--------ttta
ctgtcgttctggcag-t--ccc-agggaaaccttaagta---aggttctggggggaatat
ggt-cgcaagtctgaaacttaaaggaattgacggaagggcaccaccaggagtggagcctg
cggcttaatttgactcaacacgggaaaactcacccggcccggacactattgtgattgaca
gat--tgatagttctttcatgatttggtggatggtggtgcatggccgttcttagttggtg
gagtgatttgtctggttaa--ttccgataacgaacgagactctagcctgc-taaatag--
---taca--ctcatacc-tt----------ggttt--------------tttcttatggt
agtgagtgaat--aa--tac-ttcttagagggattgg-tgg------cttcta--gtcac
atgaaa-ttgagcaataacaggtctgtgatgccctta-gatgtccggggccgcac-----
----------------------------------gcgcg-ctacaatgatagtggcagag
agtt------tccttggccgaaa-ggtctgggtaatctt--gtaatcactatctcgtcag
ggatcggggtttgtaattatcccccgtgaacgaggaattcccagtaagcgcaagtcatca
acttgcgttgattacgtccctgccctttgtacacaccgcccgtcgctacaaccga-tgga
cgtcttagtgaggttatcggattggatgtatggg-a--g-tgctt-----------tgtc
tctctt---aatg-cattcgag-aaga-taatcaaac-ttggtcgtttagaggatg--t-
aaaagtcgtaacaaggtt-tctgtaggtgaacctgc-aga-tggat--------------
------------------------------------------------------------
------------------------------------------------------------
------------------------------------------------------------
------------------------------------------------------------
------------------------------------------------------------
-----------
>KC529515_Bresslauilla_relicta
------------------------------------------------------------
------------------------------------------------------------
--------------------------------------------ctcattaaatcagcta
tgatttcttagatctta-cat-cccttacttgg--ataactgaagtaattctt-gagcta
ataca-tgcc-aa--caaatgtttcggct-----------ttcgggtcggaat-ggactt
attag-taca--aaatca-ac-ctg--gt-------ttc-----------g---gccag-
t-tgt------------------tttgt-tg-actcaggataat-tct-t--ctgatcgc
acgg-tc--tcgtaccagcgacgtatc-tttcaagtgtctgccctatca-actttcgatg
gtgggttatatgccta-ccatggttattacgggtgacggggaatcagggttcgattccgg
agagggag-cctgagaaatggctgctacatctaaggatggcagcaggcgcgcaacttacc
cactgctagtg---gcagcgaggtagtga-cgataaataacaatacagaactc-ttt-tg
aggctctgtcattggaatgagaacaa-tttaaatcc-ttt-aacgaggatcaattgg-ag
ggcaag-tctggtgccagcagccgcggtaattccagct-ccaatagcatatattaaaatt
gttgcagttaaaaagctcgtagttggatctcaggttggt--------gtcggccag-tgc
ctgc-tt-----------t------gtaggtttcgggcc-gtcccaccttatt-------
-----agctgtatg-cgtctatcagtgctctttactgagtg-ct--gg-tagtgctcagc
atgtttactttgaacaaattagagtgctcaaagcaggc-t-tt--tatgccggaataa-t
tt-tgcatggaataatggaataaggctct---gcc-gct-attttgtt-g-attttc-ag
t-atta-atgc-agagtaa-tgattaaaaggagcagaacgggggcaaaagtatggtcgcg
atagaggtga---aattcttggaccgtggccagactaac-tactgcgaaagcatttgcca
aggatgccttcattaatcaagaacgaaagtcagaggatcgaagacgatcagataccgt-c
ctagttctgactataaactatgccaacaggcc-atcggggca----tt--------tatt
atgatgtcccggcag-c-cccc-agggaaacct--agtg---aggttctggggggaatat
ggt-cgcaagtctgaaacttaaaggaattgacggaagggcaccaccaggagtggagcctg
cggcttaatttgactcaacacgggaaaactcacccggcccggacactgtcaggattgaca
gat--tgatagctctttcatgattcggtggatggtggtgcatggccgttcttagttggtg
gagtgatttgtctggttaa--ttccgataacgaacgagactctagcctgc-taaatag--
---tgca--gatatatcctg----------ttct---------------cttcggagtct
ggattgtgctt-gat--cac-ttcttagagggattgg-tgg------cattta--gtcac
atgaaa-ttgagcaataacaggtctgtgatgccctta-gatgtccggggccgcac-----
----------------------------------gcgcg-ctacaatgatagtggcaaaa
agt-------ctctgagccgaaa-ggcttgggtaatctt--ttaaacactatctcgtcag
ggatcagggtttgtaattatcccctgtgaacgaggaattcctagtaagcgcaagtcatca
acttgtgctgattatgtccctgccctttgtacacaccgcccgtcgctactaccgattgaa
tggtttagtgaggttattggaccgggatcacgga-g--c-tgctt-------------gc
agttca---ggtg-ttactggg-aaga-gaatcgaac-ttgatcatttagaggaag--t-
aaaagtcgtaacaaggtt-ttcgtaggtgaacctgc-ag---------------------
------------------------------------------------------------
------------------------------------------------------------
------------------------------------------------------------
------------------------------------------------------------
------------------------------------------------------------
-----------
>KC529514_Pseudograffilla_arenicola
------------------------------------------------------------
--------------cctgccagtaatgat-atgcttgcataaaggactaag-ccatgcat
gtataagttcaca-cc-t-ttat-aaggtgaaaccgca-tatggctcattaaatcagtta
taattccttagatctta-tatccctctacttgg--ataactgtagaaattcta-gagcta
ataca-tgcc-t---ttaatgccttagcc-----------ttcgggttagggt-ggattt
attag-atca--aaacca-ac-acg--tg-------ctt----------cg-gtgc-gt-
t-agg------------------tttga-tg-actctggataac-tctac--ctgatcgc
atgg-cc--ttgtgccagcgacgtatc-ttccaagttgctgccctatca-actttcgatg
gtaggttatatgccta-ccatggttgtaacgggtaacggggaatcagggttcgattccgg
agagggag-ccttagaaatggctgctacatctaaggaaggcagcaggcgcgcaatttacc
cactgttagtg--aacagcgaggtagcga-caataaataacaatacagaactc-tat-tg
aggctctgtaattggaatgagtacaa-tttaaatcc-ttt-aacgaggaacaattgg-ag
ggcaag-tctggtgccagcagccgcggtaattccagct-ccaatagcgtatattaaaatt
gttgcagttaaaaagctcgtagttggatctgaggttgtg--------gatgcattg-ttt
gcct-tc-----------t------aggcattactttgc-atcccaccttctt-------
-----agtcgtag--ctattgctagtactcttcattgagtcgct--ag-tgatgcacggc
atgtttactttgaaaaaattagagtgcttaaagcagg--c-tt--tttgcctgtatat-t
gt-tgcatagaataatataaaaaggctcc---gct-aac-attttgtt-g-gttttc-gt
ta--tt-atgc-ggagcaa-tgattaaaaggagtagaacgggggcaaaagtatggccacg
atagaggtga---aattcgttgaccgtggcccgactgcc-tacagcgaaagcatttgcca
agaatgccttcattaatcaagaacgaaagtcagaggttcgaagacgatcagataccgt-c
ctagttctgactgtaaactatgccaactgacc-atcatagcg-----a--------tatt
tcgttgctatggcag-t--ccc-agggaaacctaaagtt---aggttctggggggaatat
ggt-cgcaagtccgaaactcaaaggaattgacggaagggcaccaccaggagtggagcctg
cggcttaatttgactcaacacgggaaaactcacccggcccggacactataaggattgaca
gat--tgatagatctttcatgatctagtgaatggtggtgcatggccgttcttagttggtg
gagtgatttgtctggttaa--ttccgataacgaacgagactcacacctgc-taaatag--
---tgca--ctcatacgg-a----------gaatt--------------tatgctaccgt
agtgagtg------t--tac-ttcttagagggattag-tga------cttcta--gtcac
atgaaa-ttgagcaataacaggtctgtgatgccctta-gatgtccggggccgcac-----
----------------------------------gcgcg-ctacaatgacagtggcaaaa
agt-------acccggcctgaaa-aggctaggcaatctt--taaatcactgtcgcgtcag
ggatcagggtttgtaattatcccctgtgaacgaggaattcccagtaagcatacgtcatca
gcttatgctgattacgtccctgccctttgtacacaccgcccgtcgctactaccgattgaa
tggtttagtgaggttatcggattgggagcataag-a--g-tagct-----------tgct
accctt---aatg-ttactgaa-aaga-taatcaaac-ttgatcatttagaggaag--t-
aaaagtcgtaacaaggca-gccgtaggtgaacctgc-aga-tggat--------------
------------------------------------------------------------
------------------------------------------------------------
------------------------------------------------------------
------------------------------------------------------------
------------------------------------------------------------
-----------
>KC529513_Vejdovskya_ignava
------------------------------------------------------------
--------------cctgccagtaatgat-atgcttgtctcaaagactaag-ccatgcat
gt-cgagttcaca-cc---tatt-atggttaaaccgca-aatggctcattaaatcagcta
tgatttcttagatctta-cat--taatacttgg--ataactgtagtaattcta-gagcta
ataca-tgcc-ca---acagaccgtggat-------------ttattcgcggt-gggttt
atcag-ttca--aaatca-ac-cag--gt-------t-------------c---gcctg-
t-cgg------------------tttga-tg-actctggataac-ttc-t--ctgatcgc
acgg-cc--ttgtgctggcgacgtatc-tttcaagtgtctgacctatca-acttacgatg
gtaggggaaatgccta-ccatggttatcacgggtaacgggggatcagggtctgattccgg
agagggag-ccttagaaatggctaccacatctaaggaaggcagcaggcgcgcaacttacc
cacttgcagtag-caagcagaggtagtga-cgaaaaataacaatgtgcaactc-tta-tg
aggctgtacaattggaatgaatccaa-tataaatcc-ttt-aatgaggaacaattag-ag
ggcaag-tctggtgccagcagccgcggtaattccagct-ctaatagcgtatattaaaatt
gttgcagttaaaaagctcgtagttggatctcagg-atgg--------cgcgccggg-ttc
tatc-tat----------t------gatagttacttggttgttccacctcatt-------
-----agtcgtt-agtttttgcaggtgctctttattgagttgct--tg-tagaacacgac
aatattactttgaaaaaattagagtgcttaaagcaggcca-tt--tgtgcctggatac-t
gt-tgcatggcataacggaataggactca---ggt-tct-attttgtt-g-gttttc-gg
t-atta-tgcc-tgagaaa-tgattaacaggagtagtacgggggctaaagtatggtcgcg
ttagaggtga---aattcttggatcgtggccagactaac-tactgcgaaagcatttgcca
aggatgccttcattaatcaagaacgaaagtcagaggttcgaaagcgatcagataccgc-t
ctagttctgaccttaaactatgccatctgatt-attggggtgga-ctt---------taa
ttgccatcccagcag-t-ccct-gggaaaccttcaagaa---aggttctggggggaatat
ggt-cgcaagtctgaaacttaaaggaattgacggaagggcaccaccaggagtggagcctg
cggcttaatttgactcaacacgggaaacctcacccggcccggacactggaaggattgaca
gat--tgagagctctttcttgattcggtggatggtggtgcatggccgttcttagttggtg
gagtgatttgtctggttaa--ttccgataacgaacgagactctagcctgc-taaatag--
---ataa--ctcatgacact--------------------------------tacgtgtt
cgcgag-ata----a--tac-ttcttagaggaattgg-cta------aactta--ttagc
atgaga-ttgagcaataacaggtctgtgatgccctta-gatgttcggggcggcac-----
----------------------------------gcgcg-ctacactgacggtgtcagaa
agtttc----tccttgcccgaaa-gggttgggtaatctt-tcgaatcactgtcacgtcag
ggatcagggtttgtaattgtcccctgtgaacgaggaattcccagtacgcatacgtcatta
gcttatgctgattacgtccctgccctttgtacacaccgcccgtcgctactaccgattgga
tggtttagtgaggtcatcggattcggctaatctg-a--a-attct--------tatgag-
--tttc---gagg-tgctggag-aaga-cgatcaaac-ttgattatctagaggaag--t-
aaaagtcgtaacaaggtt-tctgtaggtgaacctgc-ag---------------------
------------------------------------------------------------
------------------------------------------------------------
------------------------------------------------------------
------------------------------------------------------------
------------------------------------------------------------
-----------
>KC529512_Vejdovskya_pellucida
------------------------------------------------------------
------------atcctgccagtaatgat-atgcttgtctcaaagactaag-ccatgcat
gt-cgagttcaca-cc---tatt-atggtaaaaccgca-aatggctcattaaatcagcta
tgatttcttagatctta-cat--acatacttgg--ataactgtagtaattcta-gagcta
ataca-tgcc-ca---acagaccgtgatt-------------tatgtcgcggt-gggttt
atcag-ttca--aaacca-at-cag--at-------tt-----------at---gtctg-
t-cgg------------------tttga-tg-actctggataac-ttc-t--ctgatcgc
atag-cc--ttgtgctggcgacgtatc-tttcaagtgtctgacctatca-acttacgatg
gtaggggaaatgccta-ccatggttatcacgggtaacgggggatcagggtctgattccgg
agagggag-ccttagaaatggctaccacatctaaggaaggcagcaggcgcgcaacttacc
cacttgcagtag-caagcagaggtagtga-cgaaaaataacaatgtacaactc-tta-tg
aggctgtacaattggaatgattccaa-tataaatcc-ttt-aatgaggaacaattag-ag
ggcaag-tctggtgccagcagccgcggtaattccagct-ctaatagcgtatattaaaatt
gttgcagttaaaaagctcgtagttggatctcagg-atgg--------cgtttcggg-ttc
tatc-tat----------t------gatagttacttggtaattccacctcatc-------
-----agtcgtt-agtttgtgtaggtgctctttattgagttgct--ta-cacaacacgac
aatattactttgaaaaaattagagtgctcaaagcaggcca-tc--agtgcctgaatac-t
gt-tgcatggcataacggaataggactct---ggt-tct-attttgtt-g-gttttc-gg
t-atta-tgcc-agagaaa-tgattaacaggagtagtacgggggctaaagtatggtcgcg
ttagaggtga---aattcttggatcgtggccagactaac-tattgcgaaagcatttgcca
aggatgccttcattaatcaagaacgaaagtcagaggttcgaaagcgatcagataccgc-t
ctagttctgaccttaaactatgccatctgatt-attgggatgga-ctt---------taa
ttgccatcccagcag-t-ccct-gggaaaccttcaagaa---aggttctggggggaatat
ggt-cgcaagtctgaaacttaaaggaattgacggaagggcaccaccaggagtggagcctg
cggcttaatttgactcaacacgggaaacctcacccggcccggacactggaaggattgaca
gat--tgagagctctttcttgattcggtggatggtggtgcatggccgttcttagttggtg
gagtgatttgtctggttaa--ttccgataacgaacgagactctagcctgc-taaatag--
---ataa--ctcatgacact--------------------------------tatgtgat
cgcgag-ata----a--tac-ttcttagaggaattgg-ctg------aatata--ttagc
atgaga-ttgagcaataacaggtctgtgatgccctta-gatgttcggggcggcac-----
----------------------------------gcgcg-ctacactgacggtgtcagaa
agttt-----gccttgcccgtga-gggttgggtaatctt-tcgaatcactgtcacgtcag
ggatcagggtttgtaattgtcccctgtgaacgaggaattcccagtacgcatacgtcatta
gcttatgctgattacgtccctgccctttgtacacaccgcccgtcgctactaccgattgga
tggtttagtgaggtcatcggattcgactactctg-g--a-attct--------tatgga-
--ttcc---gagg-tgttggag-aaga-cgatcaaac-ttgattatctagaggaag--t-
aaaagtcgtaacaaggtt-tctgtaggtgaacctgc-aga-tggat--------------
------------------------------------------------------------
------------------------------------------------------------
------------------------------------------------------------
------------------------------------------------------------
------------------------------------------------------------
-----------
>KC529511_Provortex_balticus
------------------------------------------------------------
---ctg-gtt-gatcctgccagtaatgat-atgcttgtctcaaagactaag-ccatgcat
gc-cgagttcaca-cc-c-ttgt-acggtgaaaccaca-aatggctcattaaatcagcta
taatttcttagatctta-cac--agctacttgg--ataactgtagtaattcta-gagcta
ataca-tgcc-ca---ttatgccgtagcttt-----------attgttacggt-gggttt
atcag-ttca--aatcca-ac-acg--gt-------tt-----------cg---gccgg-
t-taa------------------tttga-tg-actctggataat-tac-t--ctaatcga
atgg-ct--ttatgccgtcgatgtatc-tttcaagtgtctgacctatca-actttcgatg
gtgagggatatgctca-ccatggttgttacgggtaacgggggatcagggtccgattccgg
agagggag-ccttagaaatggctaccacatctaaggaaggcagcaggcgcgcaaattacc
cacttgcagtgc-caagcagaggtagtga-caaaaaataacaatgtggaactc-tta-cg
aggctccacaattggaatgaatacat-tctaaatcc-ttt-aatgaggaacgattgg-ag
ggcaag-tctggtgccagcagccgcggtaattccagct-ccaatagcgtatattaaattt
gttgcagttaaaaagctcgtagttggatctcagg-ataa--------tactccttg-ttt
attc-tat----------t------gaatattacttggttgtattacctaatc-------
-----agtcatt-agcttcgtgctgtattctttattgag-tgca--gt-acggacatggc
aatattactttgaaaaaattagagtgctcaaagcaggtca-tta-tgtgcctgtatac-t
gt-tgcatggtataacggaataggactcc---ggt-tct-attttgtt-g-gttttc-gg
t-at-a-tacc-ggagtaa-tgattaacaggagta-tacgggggctaaagtattgcagcg
ttagaggtga---aattcgtggatcgttgcaagactaac-tactgcgaaagcatttgcca
aggatgccttcattaatcaagaacgaaagacagaggttcgaaagcgatcagataccgc-t
ctagttctgtccgtaaactatgccatctgatt-attggaacgg--ttt---------tat
ctaccgatccagcag-t-ccct-gggaaaccttcaagaa---aggttctggggggaatat
ggt-tgcaagactgaaacttaaaggaattgacggaagggcaccaccaggagtggagcctg
cggcttaatttgactcaacacggggaatctcacccggcccgaacactgtaaggattgaca
gat--tgagagctctttcttgattcggtggatggtggtgcatggccgttcttagttggtg
gagtgatttgtctggttaa--ttccgataacgaacgagactctagcctgc-taaatag--
---tcaa--tccataacatg--------------c--------------t--tacatgct
tgtgat-att----g---ac-ttcttagagggattgg-cta------aattta--atagc
atgaga-ttgagcaataacaggtctgtgatgccctta-gatgttcggggccgcac-----
----------------------------------gcgcg-ctacactgactgtgtcagaa
agtct-----tcctggctcgaga-gagtcgggtaatctt-tcgaatcacagtctcgtcag
ggatcggggtttgtaattgtcccccgtgaacgaggaattcctagtaagcacaagtcatca
gcttgtgctgattacgtccctgccctttgtacacaccgcccgtcgctactaccgattgga
tgatttagtgaggtcgttggatctatcttgcccg-a--g-tcat---------tactga-
--cttg---gact-tgacggaa-aaga-cgatcaaac-ttggttatctagaggaag--t-
aaaagtcgtaacaaggtt-tctgtaggtgaacctgc-aga-tggat--------------
------------------------------------------------------------
------------------------------------------------------------
------------------------------------------------------------
------------------------------------------------------------
------------------------------------------------------------
-----------
>KC529510_Provortex_karlingi
------------------------------------------------------------
-------------tcctgccagtaatgat-atgcttgtctcaaagactaag-ccatgcat
gc-cgagttcaca-cc-c-ttgt-acggtgaaaccaca-aatggctcattaaatcagcta
taatttcttagatctta-cac--agctacttgg--ataactgtagtaattcta-gagcta
ataca-tgcc-ca---ttatgccgtagcgtt-----------atagttatggt-gggttt
atcag-ttca--aatcca-ac-tcg--gt-------tt-----------cg---gccgg-
t-aaa------------------tttga-tg-actctggataat-tac-t--ctaatcga
atgg-ct--ttatgccgtcgatgtatc-tttcaagtgtctgacctatca-actttcgatg
gtgagggatatgctca-ccatggttgttacgggtaacgggggatcagggtccgattccgg
agagggag-ccttagaaatggctaccacatctaaggaaggcagcaggcgcgcaaattacc
cacttgcagtgc-caagcagaggtagtga-caaaaaataacaatgtggaactc-tta-tg
aggctccacaattggaatgaatacat-tctaaatcc-ttt-aatgaggaacgattgg-ag
ggcaag-tctggtgccagcagccgcggtaattccagct-ccaatagcgtatattaaattt
gttgcagttaaaaagctcgtagttggatctcagg-ataa--------ttcaccttg-tat
attc-tat----------t------gaatattacttggctgtattacctaatc-------
-----agtcatt-agcttcgtgctgtattctttattgag-tgca--gt-acggacatggc
aatattactttgaaaaaattagagtgctcaaagcaggtca-tta-tgtgcctgtatac-t
gt-tgcatggtataacggaataggactcc---ggt-tct-attttgtt-g-gttttc-gg
t-at-a-tacc-ggagtaa-tgattaacaggagta-tacgggggctaaagtattgcagcg
ttagaggtga---aattcgtggatcgttgcaagactaac-tactgcgaaagcatttgcca
aggatgccttcattaatcaagaacgaaagacagaggttcgaaagcgatcagataccgc-t
ctagttctgtccgtaaactatgccatctgatt-attggaacgg--ttt---------tat
ctaccgatccagcag-t-ccct-gggaaaccttcaagaa---aggttctggggggaatat
ggt-tgcaagactgaaacttaaaggaattgacggaagggcaccaccaggagtggagcctg
cggcttaatttgactcaacacggggaatctcacccggcccgaacactgtaaggattgaca
gat--tgagagctctttcttgattcggtggatggtggtgcatggccgttcttagttggtg
gagtgatttgtctggttaa--ttccgataacgaacgagactctagcctgc-taaatag--
---ttga--tccatgacatg--------------c--------------t--tacatgtt
tgtgat-att----a---ac-ttcttagagggattgg-cta------aattta--atagc
atgaga-ttgagcaataacaggtctgtgatgccctta-gatgttcggggccgcac-----
----------------------------------gcgcg-ctacactgacagtgtcagaa
agcat-----tcctggctcgaga-gagtcgggtaatctt-tcgaatcactgtctcgtcag
ggatcggggtttgtaattgtcccccgtgaacgaggaattcctagtaagcacaagtcatca
gcttgtgctgattacgtccctgccctttgtacacaccgcccgtcgctactaccgattgga
tgatttagtgaggtcgttggatctatcttgcctg-a--g-tcat---------tacaga-
--cttg---gact-tgacggaa-aaga-cgatcaaac-ttggttatctagaggaag--t-
aaaagtcgtaacaaggtt-tctgtaggtgaacctgc-ag---------------------
------------------------------------------------------------
------------------------------------------------------------
------------------------------------------------------------
------------------------------------------------------------
------------------------------------------------------------
-----------
>KC529509_Provorticidae_NVS2013
------------------------------------------------------------
------------------ccagtaatgat-atgcttgtctcaaagattaag-ccatgcat
gtaaaagttcaca-cc-c-ttgt-acggtgaaaccgca-tatggctcattaaatcagcta
taattccttagatctta-cat-cccttacttgg--ataactgtagtaattcta-gagcta
ataca-tgcc-at--tttatgccgtagcc-----------ttcgggttatggt-ggattt
attag-taca--aagcca-ac-cgg--tc-------ttc----------gg---gc-tg-
t-agg------------------tttga-tg-actctggataac-tctac--ctgatcgc
atgg-cc--ttgtgccagcgacgtatc-tttcaagtgtctgccctatca-actttcgatg
gtgggttatatgccta-ccatggttataacgggtgacggggaatcagggttcgattccgg
agagggag-ccttagaaatggctgctacatctaaggaaggcagcaggcgcgcaacttacc
cactgttagag--a-cagcgaggtagtga-cgataaataacaatacagaactc-tta-tg
aggctctgtaattggaatgagtacaa-tttaaatcc-ttt-aacgaggaacaattgg-ag
ggcaag-tctggtgccagcagccgcggtaattccagct-ccaatagcgtatattaaaatt
gttgcagttaaaaagctcgtagttggatctcaggttgtg--------gatgataag-tgt
gtct-taa----------t------aggcactacttggc-atcccgccttacc-------
-----agtcgttagcctattattggtgctctttactgagttgct--ag-taatgcacgac
atatttactttgaaaaaattagagtgcttaaggcaggc-t-tt--ttcgcctgtataa-t
gt-tgcatggaataatggaatagggctct---gcc-gct-attttgtt-g-gttttc-ag
t-atat-t-gc-agagtaa-tgattaaaaggagtagaacgggggctaaagtatggtcgcg
ctagaggtga---aattcttggaccgtggccagactaac-tattgcgaaagcatttgcca
aggatgccttcattaatcaagaacgaaagtcagaggttcgaagacgatcagataccgt-c
ctagttctgactataaactatgccaactgacc-atcagagcgtt-tta--------tttt
ttttcgttctggcag-t--ccc-agggaaaccttaagta---tggttctggggggaatat
ggt-cgcaagtctgaaacttaaaggaattgacggaagggcaccaccaggagtggagcctg
cggcttaatttgactcaacacgggaaaactcacccggcccggacactataaggattgaca
gat--tgatagttctttcatgatttggtggatggtggtgcatggccgttcttagttggtg
gagtgatttgtctggttaa--ttccgataacgaacgagactcttgcctgc-taaatag--
---taca--ctcatacc-tc----------ggctt--------------tttcctatggt
agtgagtgatt---t--tac-ttcttagagggattgg-tgg------cttcta--gtcac
atgaaa-ctgagcaataacaggtctgtgatgccctta-gatgtccggggccgcac-----
----------------------------------gcgcg-ctacactgatagtggcaaaa
agtt------tcctgggccgaaa-ggtctgggtaatctt--tcaatcactatctcgtcag
ggatcagggtttgtaattatcccctgtgaacgaggaattcctagtaagtacaagtcatca
acttgtgctgattgcgtccctgccctttgtacacaccgcccgtcg---------------
------------------------------------------------------------
------------------------------------------------------------
------------------------------------------------------------
------------------------------------------------------------
------------------------------------------------------------
------------------------------------------------------------
------------------------------------------------------------
------------------------------------------------------------
-----------
>KC529508_Pogaina_sp2_NVS2013
------------------------------------------------------------
--------------cctgccagtaatgat-atgcttgtctcaaagattaag-ccatgcat
gtataagttcaca-cc-c-ttgt-atggtgaaaccgca-tatggctcattaaatcagcta
taattccttagatctta-c-tacctctacttgg--ataactgtagaaattcta-gagcta
ataca-tgcc-aa--tttatgccttggcc-----------ttcgggctagggt-ggattt
attag-taca--aaacca-tt-ctg--tc-------gca----------ag---gc-ag-
t--gg------------------tttgt-tg-actctggataac-tctac--ctgatcgc
acgg-cc--ttgtgccagcgacgtatc-tttcaagtgtctgccctatca-actttcgatg
gtaggttatatgccta-ccatggttataacgggtgacggggaatcagggttcgattccgg
agagggag-ccttagaaatggctgctacatctaaggaaggcagcaggcgcgcaacttacc
cactgttagct----cagcgaggtagtga-cgaaaaataacaatacagaactc-tta-tg
aggctctgtaattggaatgagtacga-tttaaatcc-tct-aacgaggaacaattgg-ag
ggcaag-tctggtgccagcagccgcggtaattccagct-ccaatagcgtatattaaagtt
gttgcagttaaaaagctcgtagttggatctcgggttgta--------agtgtacag-ttc
gcca-tt-----------t------aggcgtcactgtgc-acttcgccttact-------
-----agtcgttag-ctattgctggtgctcttaactgagttgtc--ag-taatacacggc
atgtttactttgaaaaaattagagtgcttaaggcaggc-c-tt--ttcgcctgtataa-c
tg-tgcatggaataatggaataagtctct---gcc-gct-attttgat-g-gttttc-ag
t-aatt-tagc-ggagaaa-tgattaaaaggggtagaacgagggctaaagtatggccgcg
ctagaggtga---aattcttggaccgtggccagactatc-tgttgcgaaagcatttgcca
aggatgctttatttaatcaagaacgaaagtcagaggttcgaagacgatcagataccgt-c
ctagttctgactataaactatgccaactgacc-atcacctag---aca--------ttat
gttttcaggtggcag-t-cccc-agggaaaccttaagta---aggttctggggggaatat
ggt-cgcaagtctgaaacttaaaggaattgacggaagggcaccaccaggagtggagcctg
cggcttaatttgactcaacacgggaaaactcacccggcccggacactgtaaggattgaca
gat--tgatagttctttcatgatttggtggatggtggtgcatggccgttcttagttggtg
gagtgatttgtctggttaa--ttccgataacgaacgagactctagcctgc-taaatag--
---taca--ctcataccctg----------ggcttt-------------tttctacgggt
tgtgagtgat----t--tac-ttcttagagggattgg-tgg------cattta--gtcac
atgaaa-ctgagcaataacaggtctgtgatgccctta-gatgtccggggccgcac-----
----------------------------------gcgcg-ctacactgatagtgtcagaa
agtt------tccttggccgaaa-ggcctgggcaatctt--tcaattactatctcgtcag
ggatcagggtttgtaattatcccctgtgaacgaggaattcccagtaagcgcaagtcatca
gcttgcgttgattacgtccctgccctttgtacacaccgcccgtcgctactaccgatt---
------------------------------------------------------------
------------------------------------------------------------
------------------------------------------------------------
------------------------------------------------------------
------------------------------------------------------------
------------------------------------------------------------
------------------------------------------------------------
------------------------------------------------------------
-----------
>KC529507_Pogaina_sp1_NVS2013
------------------------------------------------------------
-----------------cccagtaatgat-atgcttgtctcaaagattaag-ccatgcat
gtataagttcaca-cc-c-ttga-atggtgaaaccgca-tatggctcattaaatcagcta
taattccttagatctta-catacctctacttgg--ataactgtagaaattcta-gagcta
ataca-tgcc-aa--tttatgccttagcc-----------ttctggttagggt-ggattt
attag-taca--aaacca-tt-ctg--tc-------gca----------ag---gc-ag-
t--gg------------------tttgt-tg-actctggataac-tctac--ctgatcgc
acgg-cc--ttgtgccagcgacgtatc-tttcaagtgtctgccctatca-actttcgatg
gtaggttatatgccta-ccatggtttttacgggtgacggggaatcagggttcgattccgg
agagggag-ccttagaaatggctgctacatctaaggaaggcagcaggcgcgcaacttacc
cactgttagtt----cagcgaggtagtga-cgataaataacaatacagaactc-ata-tg
aggctctgtaattggaatgagtacga-tttaaatcc-tct-aacgaggagcgattgg-ag
ggcaag-tctggtgccagcagccgcggtaattccagct-ccaatagcgtatattaaagtt
gttgcagttaaaaagctcgtagttggatctggggttgta--------agtgcacag-tgc
ggcc-tt-----------t------agttgctactgtgt-acttcgccttact-------
-----agtcgttag-tagttactggtgctcttaattgagttgtc--ag-taatgcacggc
atgtttactttgaaaaaattagagtgctcaaggcaggc-c-tt--ttcgcctgtataa-c
gt-tgcatggaataatggaataagtctct---gcc-gct-attttgat-g-gttttc-ag
t-aatt-tagc-ggagaaa-tgattaaaaggggtagaacgagggctaaagtatggtcgcg
ctagaggtga---aattcttggaccgtggccagactatc-cgttgcgaaagcatttgcca
aggatgctttatttaatcaagaacgaaagtcagaggttcgaagacgatcagataccgt-c
ctagttctgactataaactatgccaactgacc-atcacagcg---aca--------ttat
gttttgctgtggcag-t-cccc-agggaaaccttaagta---tggttctggggggaatat
ggt-cgcaagtctgaaacttaaaggaattgacggaagggcaccaccaggagtggagcctg
cggcttaatttgactcaacacgggaaaactcacccggcccggacactgtaaggattgaca
gat--tgatagttctttcatgatttggtggatggtggtgcatggccgttcttagttggtg
gagtgatttgtctggttaa--ttccgataacgaacgagactctagcctgc-taaatag--
---taca--ctcataccctg----------ggctta-------------tttctacgggt
tgtgagtgat----t--tac-ttcttagagggattgg-tgg------cattta--gtcac
atgaaa-ctgagcaataacaggtctgtgatgccctta-gatgtccggggccgcac-----
----------------------------------gcgcg-ctacactgacagtgtcagaa
agtc------tccttggccgaaa-ggcctgggtaatctt--tcaattactgtctcgtcag
ggatcagggtttgtaattatcccctgtgaacgaggaattcccagtaagcgcgagtcatca
gcttgcgttgattacgtccctgccctttgtacacaccgcccgtcgctactaccgattgga
tggtttagtgaggttatcggattgttggtatgag-a--g-tggct-----------tgct
gctctt---aata-ccttcgaa-aaga-tactcaaac-ttgaccatttagaggaag--t-
aaaagtcgtaacaaggtt-tccgtaggtgaacct--------------------------
------------------------------------------------------------
------------------------------------------------------------
------------------------------------------------------------
------------------------------------------------------------
------------------------------------------------------------
-----------
>AY775772_Styloplanella_strongylostomoides
------------------------------------------------------------
---ctg-gtt-gatcctgccagtaattat-atgcttgtctcaaagattaag-ccatgcat
gtatcagttcaaa-cc-t-ttac-acggttaaaccgcg-aatggctcattaaatcagcta
taatttcttagatctta-aaaa--t-tacttgg--ataactgcagtaattctg-gagcta
ataca-tg-a--a--c-tatgcctcagttt--------------tctgggtgc-ggattt
attag-aaca--aaacca-ac-cgg---c-------ttc-----------g-g--t-cg-
t-tg-------------------tttgg-tg-actctggataac-tt-ac--ctgatcgc
atga-cc--tagcgtcggcgacgtatc-tttcaagtgtctgacctatca-actgacgttg
gtgagttacatgctca-ccatggttataacgggtaacggggaatcagggttcgataccgg
agagggag-ccttagaaatggctaccacatctaaggaaggcagcaggcgcgcaaattacc
cactctcagct----cgaggaggtagtga-cgataaataacaatgcgggactc-ataatg
aggctccgcaattggaatgagtacaa-tttaaatcc-ttt-aacgaggatcaattgg-ag
ggcaag-tctggtgccagcagccgcggtaattccagct-ccaatagcgtatattaaaatt
gttgcagttaaaaagctcgtagttggatctcaggtt-tg-------gtgtg-tcgg-tct
ggtcgttg----tacta-t---------gactgtg-cac--atctacctttat-------
-t---agctgtatgatgctccacggtgttcttcactgaatgctgt-gt-gggtgctcggc
acgtttaccttgaaaaaatcagagtgcttaaagcaggcct--t--tgtgcttgaatgt-t
gt-tgcatggaataatggaataggacttc---ggt-tct-attttgtt-g-gttttc-gg
t-a------tc-gaagtaa-tgaaaaatagagacag-acgggggcatttgtatggcggtg
ggagaggtga---aattctgagatcgccgccagacaaac-tactgcgaaagcatttgtca
agcatgtcttcattaatcaagaacgaaagtcagaggttcgaagacgatcagataccgt-c
ctagttctgaccataaacgatgccgaccgata-atcaggggtgg-tta---ttttattat
tgaccctcctggttg-t-ccct-gggaaacctcttagtc---aggttctggggggaatat
ggt-ctcaaggccgaaacttaaaggaattgacggaagggcaccaccaggagtggagcctg
cggcttaatttgactcaacacggggaatctcacccggtccggacactgggaggattgaca
gat--tgatagctctttcttgattcagtgggtggtggtgcatggccgttcttagttggtg
gagtgatttgtctggttaa--ttccgataacgaacgagactctattctgc-taaatag--
---ttca--atggcatcag--------------ccgct---------------ttgtggc
taca-gctgtt-gca--aac-ttcttagagaaattcg-cggaac-----tata-aaccgc
acgaaa-gagagcaataacaggtctgtgatgccctta-gatgtccggggccgcac-----
----------------------------------gcgcg-ctacattgacagtaacaaaa
agtattt-ccacctggtccgaaa-ggattgggaaatctg--tgaattactgtctccacag
ggattggggtttgtaattatcccccatgaacgaggaattcctagtaggcgcaagtcatca
gcttgcgtcgattacgtccctgccctttgtacacaccgcccgtcgctactaccgatcgag
tggattagtgaggacctcagattgatggctttgc-g--g-c------------gcaagtc
gt-------atcg-tcgtcgag-aagt-ggttcaaac-ttgttcatttagaggaag--t-
aaaagtcgtaacaaggtt-tccgtaggtgaacctgc-aga-tggat--------------
------------------------------------------------------------
------------------------------------------------------------
------------------------------------------------------------
------------------------------------------------------------
------------------------------------------------------------
-----------
>KC529506_Pogaina_sp3_NVS2013
------------------------------------------------------------
-------gtt-gatcctgccagtaatgat-atgcttgtctcaaagattaag-ccatgcat
gtataagttcaca-cc-c-ttgtgaaggtgaaaccgca-tatggctcattaaatcagcta
taattccttagatctta-catacctctacttgg--ataactgtagaaattcta-gagcta
ataca-tgcc-aa--tttatacttcagct-----------ttcgggctggggt-ggattt
attag-taca--aaatca-tt-ctg--ct-------tc------------g---gc-ag-
t--tg------------------tttgt-tg-actctggataac-tctac--ctgatcgc
acgg-cc--ctgcgccagcgacgtatc-tttcaagtgtctgccctatca-actttcgatg
gtaggttatatgccta-ccatggttataacgggtgacggggaatcagggttcgattccgg
agagggag-ccttagaaatggctgctacatctaaggaaggcagcaggcgcgcaacttacc
cactgttagtt----cagcgaggtagtga-cgataaataacaatacagaactc-tta-tg
aggctctgtaattggaatgagtacga-tttaaatcc-tctcaacgaggaacgattgg-ag
ggcaag-tctggtgccagcagccgcggtaattccagct-ccaatagcgtatattaaagtt
gttgcagttaaaaagctcgtagttggatctcgggttgtg--------aatgcatgg-tgt
ggca-tt-----------t------agctactactatgc-attccgccttact-------
-----agtcgttag-ctattgctggtgctcttaactgagttgct--ag-caatgcacggc
atgtttactttgaaaaaattagagtgctcaaggcaggc-a-tt--tgcgcctgtatag-t
gt-tgcatggaataatggaataagactct---gcc-gct-attttgat-g-gttttc-gg
t-tatt-tagc-ggagtaa-tgattaaaaggggtagaaagagggctgaagtatggtcgcg
ctagaggtga---aattcttggaccgtggccagactatc-tattgcgaaagcatttgcca
aggatgctttaattaatcaagaacgaaagtcagaggttcgaagacgatcagataccgt-c
ctagttctgactataaactatgccaactgacc-atcacagcg---aca--------tttt
gtttcgttgtggcag-t-cccc-agggaaaccttaagta---tggttctggggggaatat
ggtacgcaagtctgaaacttaaaggaattgacggaagggcaccaccaggagtggagcctg
cggcttaatttgactcaacacgggaaaactcacccggcccggacactgtaaggattgaca
gat--tgatagttctttcatgatttggtggatggtggtgcatggccgttcttagttggtg
gagtgatttgtctggttaa--ttccgataacgaacgagactctagcctgc-taaatag--
---taca--ctcatacccga----------ggcttt-------------tttcttagggt
agtgagtgag----t--tac-ttcttagagggattgg-tgg------cttcta--gtcac
atgaaa-ttgagcaataacaggtctgtgatgccctta-gatgtccggggccgcac-----
----------------------------------gcgcg-ctacactgatagtatcagaa
agtt------tccttggccgaaa-ggcctgggtaatctc--tcaattactatctcgtcag
ggatcagggtttgtaattatcccctgtgaacgaggaattcccagtaagcacaagtcatca
gcttgtgctgattacgtccctgccctttgtacacaccgcccgtcgctactaccgatt---
------------------------------------------------------------
------------------------------------------------------------
------------------------------------------------------------
------------------------------------------------------------
------------------------------------------------------------
------------------------------------------------------------
------------------------------------------------------------
------------------------------------------------------------
-----------
>KC529505_Baicalellia_brevituba
------------------------------------------------------------
---ttg-gtt-gatcctgccagtaatgat-atgcttgtctcaaagattaag-ccatgcat
gtataagttcaca-cc-c-ttgt-acggtgaaaccgca-aatggctcattaaatcagcta
taattccttagatctta-cat-cccttacttgg--ataactgtagtaattcta-gagcta
ataca-tgcc-aa--tttataccttagct-----------ttcgggctggggt-ggattt
attag-taca--aaacca-ac-acg--tc-------ttc----------gg---gc-gt-
t-agg------------------tttga-tg-actctggataac-tctac--ctgatcgc
atgg-cc--ttgtgccagcgacgtatc-tttcaagtgtctgccctatca-actttcgatg
gtgggttatatgccta-ccatggttataacgggtgacggggaatcagggttcgattccgg
agagggag-ccttagaaatggctgctacatctaaggaaggcagcaggcgcgcaacttacc
cactgttagtg--a-cagcgaggtagtga-cgataaataacaatacagaactc-tta-tg
aggctctgtaattggaatgagtacaa-tttaaatcc-ttt-aacgaggaacaattgg-ag
ggcaag-tctggtgccagcagccgcggtaattccagct-ccaatagcgtatattaaaatt
gttgcagttaaaaagctcgtagttggatctcaggttgtg--------aatgcaggg-tct
ggtt-ttt----------t------agccacgactctgt-tttccgccttact-------
-----agtcgttag-ctattactggtgctctttactgagttgct--ag-taatgcacgac
atgtttactttgaaaaaattagagtgctcaaggcaggc-t-tt--tttgcctgtataa-t
gt-tgcatggaataatggaatagggctct---gcc-gct-attttgtt-g-gttttc-ag
t-aata-aagt-agagcaa-tgattaaaaggagtagaacgggggctaaagtatggtcgcg
ctagaggtga---aattcttggaccgtggccagactaac-tattgcgaaagcatttgcca
aggatgccttcattaatcaagaacgaaagtcagaggttcgaagacgatcagataccgt-c
ctagttctgactataaactatgccaactgacc-atccgggcg-a-tta--------ttta
ttttcgtcctggcag-t--ccc-agggaaaccttaagta---tggttctggggggaatat
ggt-cgcaagtctgaaacttaaaggaattgacggaagggcaccaccaggagtggagcctg
cggcttaatttgactcaacacgggaaaactcacccggcccggacactataaggattgaca
gat--tgatagttctttcatgatttggtggatggtggtgcatggccgttcttagttggtg
gagtgatttgtctggttaa--ttccgataacgaacgagactctagcctgc-taaatag--
---taca--ctcatacc-ta----------ggctt--------------tttctaacggt
agtgagtgatt---a--tac-ttcttagagggattgg-tgg------cttcta--gtcac
atgaaa-ctgagcaataacaggtctgtgatgccctta-gatgtccggggccgcac-----
----------------------------------gcgcg-ctacactgatagtggcaaaa
agtt------tccttggccgaaa-ggtctgggtaatctt--ctaatcactatctcgtcag
ggatcagggtttgtaattatcccctgtgaacgaggaattcccagtaagcacaagtcatca
acttgtgctgattacgtccctgccctttgtacacaccgcccgtcgctactacc-------
------------------------------------------------------------
------------------------------------------------------------
------------------------------------------------------------
------------------------------------------------------------
------------------------------------------------------------
------------------------------------------------------------
------------------------------------------------------------
------------------------------------------------------------
-----------
>KC529504_Canetellia_beauchampi
------------------------------------------------------------
----------------------taatgat-atgcttgtctcaaagattaag-ccatgcat
gtataagttcaca-cc-c-ttgt-acggtgaaaccgca-aatggctcattaaatcagcta
taattccttagatctta-cat-cccttacttgg--ataactgtagtaattcta-gagcta
ataca-tgcc-aa--tttataccttagct-----------ttcgggctggggt-ggattt
attag-taca--aaacca-ac-acg--tc-------ttc----------gg---gc-gt-
t-agg------------------tttga-tg-actctggataac-tctac--ctgatcgc
atgg-cc--ttgtgccagcgacgtatc-tttcaagtgtctgccctatca-actttcgatg
gtgggttatatgccta-ccatggttataacgggtgacggggaatcagggttcgattccgg
agagggag-ccttagaaatggctgctacatctaaggaaggcagcaggcgcgcaacttacc
cactgttagtg--a-cagcgaggtagtga-cgataaataacaatacagaactc-aat-tg
aggctctgtaattggaatgagtacaa-tttaaatcc-ttt-aacgaggaacaattgg-ag
ggcaag-tctggtgccagcagccgcggtaattccagct-ccaatagcgtatattaaaatt
gttgcagttaaaaagctcgtagttggatctcaggttgtg--------aatgcaggg-tct
ggtt-ttt----------t------agccacgactctgt-tttccgccttact-------
-----agtcgttag-ctattactggtgctctttactgagttgct--ag-taatgcacgac
atgtttactttgaaaaaattagagtgctcaaggcaggc-t-tt--tttgcctgtataa-t
gt-tgcatggaataatggaatagggctct---gcc-gct-attttgtt-g-gttttc-ag
t-aata-aagt-agagcaa-tgattaaaaggagtagaacgggggctaaagtatggtcgcg
ctagaggtga---aattcttggaccgtggccagactaac-tattgcgaaagcatttgcca
aggatgccttcattaatcaagaacgaaagtcagaggttcgaagacgatcagataccgt-c
ctagttctgactataaactatgccaactgacc-atccgggcg-a-tta--------ttta
ttttcgtcctggcag-t--ccc-agggaaaccttaagta---tggttctggggggaatat
ggt-cgcaagtctgaaacttaaaggaattgacggaagggcaccaccaggagtggagcctg
cggcttaatttgactcaacacgggaaaactcacccggcccggacactataaggattgaca
gat--tgatagttctttcatgatttggtggatggtggtgcatggccgttcttagttggtg
gagtgatttgtctggttaa--ttccgataacgaacgagactctagcctgc-taaatag--
---taca--cccatacc-ta----------ggctt--------------tttctaacggt
agtgggtgatt---a--tac-ttcttagagggattgg-tgg------cttcta--gtcac
atgaaa-ctgagcaataacaggtctgtgatgccctta-gatgtccggggccgcac-----
----------------------------------gcgcg-ctacactgatagtggcaaaa
agtt------tccttggccgaaa-ggtctgggtaatctt--ctaatcactatctcgtcag
ggatcagggtttgtaattatcccctgtgaacgaggaattcccagtaagcacaagtcatca
acttgtgctgattacgtccctgccctttgtacacaccgcccgtcgctactaccgattgaa
tggtttagtgaggtcatcggattggaggtatggg-a--g-tgctt-------------gc
attctt---aata-tcttcgaa-aaga-taatcaaac-ttgatcatttagaggaag--t-
aaaagtcgtaacaaggtt-tccgtaggtgaacctgc-aga-tggat--------------
------------------------------------------------------------
------------------------------------------------------------
------------------------------------------------------------
------------------------------------------------------------
------------------------------------------------------------
-----------
>KC529503_Balgetia_semicirculifera
------------------------------------------------------------
-----g-gtt-gatcctgccagtaatgat-atgcttgtctcaaagattaag-ccatgcat
gtacaagttcacg-cc-c-tcgt-acggcgaaaccgca-tatggctcattaaatcagcta
tgattccttagatctta-tac-cctctacttgg--ataactgtagtaattcta-gagcta
ataca-tgcc-aa--tttatgcctttgcc-----------ttcgggctggggt-ggattt
attag-taca--aaacca-tt-cag--gt-------gtt----------acagctt-gt-
t-tgt------------------tttgt-tg-actctggataac-tctac--ctgattgc
acgg-cc--ttgtgccagcaacgtatc-tttcaagtgtctgccctatca-actttcgatg
gtgagttatatgctca-ccatggttataacgggtaacggggaatcagggttcgattccgg
agagggag-ccttaaaaatggctgctacatctaaggaaggcagcaggcgcgcaacttacc
cactgttagcg--a-cagcgaggtagtga-cgataaataacaatacagaactc-tta-tg
aggctctgtaattggaatgaacacag-tctaaatcc-ttt-aatgaggatcaattgg-ag
ggcaag-tctggtgccagcagccgcggtaattccagct-ccaatagcgtatattaaaatt
gttgcagttaaaaagctcgtagttggatctcaggttgtg--------gatgtcagg-tgt
accc-tt-----------t------gagtactaccgggc-atcccgccttact-------
-----agccgttag-cagctattggtgctcttaactgagttgct--aa-taatgcacggc
atgtttactttgaaaaaattagagtgctcaaagcaggc-t-tt--attgcctgtataa-t
gt-tgcatggaataatggaatagggctct---gcc-gct-attttatt-g-gttttc-gg
t-aact-ttgt-agagcaa-tgattaacaggagtagaacgggggctaaagtatggtcgcg
atagaggtga---aattcttggaccgcggccagactaac-tattgcgaaagcatttgcca
aggatgctttcattaatcaagaacgaaagtcagaggttcgaagacgatcagataccgt-c
ctagttctgactataaactatgccaactgacc-atccaaacg-t-ttt--------ttta
attacgttttggcag-t--ccc-agggaaacctaaagtt---aggttctggggggaatat
ggt-cgcaagtctgaaacttaaaggaattgacggaagggcaccaccaggagtggagcctg
cggcttaatttgactcaacacgggaaaactcacccggcccggacactgtaaggattgaca
gat--tgatagctctttcatgatttggtggatggtggtgcatggccgttcttagttggtg
gagtgatttgtctggttaa--ttccgataacgaacgagactgaagcctgc-taaatag--
---tcca--ctcatacc-tt----------cggta--------------attccatatgc
agtgggtggc----a--tac-ttcttagagggattga-tgg------cttcta--gccat
aagaga-ctcagcaataacaggtctgtgatgccctta-gatgtccggggccgcac-----
----------------------------------gcgcg-ctacactgatagtggcaaaa
agtt------tccttggctgaaa-agtctgggtaatctt--tgaatcactatctcgtcag
ggatcagggtttgtaattatcccctgtgaacgaggaattcccagtaagcacaagtcatca
acttgtgctgattacgtccctgccctttgtacacaccgcccgtcgctactaccgattgaa
tggtttagtgaggttattggattggaggtatggg-a--g-tgagc-----------aatt
gctcct---tgta-ccatcgag-aaaa-taatcaaac-ttgatcatttagaggaag--t-
aaaagtcgtaacaaggtt-tccgtaggtgaacctgc-aga-tggatca------------
------------------------------------------------------------
------------------------------------------------------------
------------------------------------------------------------
------------------------------------------------------------
------------------------------------------------------------
-----------
>KC529502_Eldenia_reducta
------------------------------------------------------------
---ctg-gtt-gatcctgccagtagtgat-atgcttgtctcaaagattaag-ccatgcat
gtataagttcaca-cc-c-tagt-acggtgaaaccgca-tatggctcattaaatcagcta
tgatttcttagatctta--at-ctcttacttgg--ataactgaagtaattctt-gagcta
ataca-tgcc-ag--aaaatgtcacgacc-----------ctcgg-ttgtgat-ggcttt
attag-taca--aaacca-ac-cac--tt-------ttc-----------g---gagtg-
c-cgg------------------tttat-tg-actcaggataac-tc--t--ctgatcgc
atgg-cc--ttgcgccagcgacgtatc-tttcaagtgtctgccctatca-actt--gatg
gcgggttatatgccta-ccatggttgtcacgggtaacggggaatcagggttcgattccgg
agagggag-ccttagaaatggctgctacatctaaggatggcagcaggcgcgcaacttacc
cactgttagtg--tacagcgaggtagtga-cggaaaataacaatacagaactc-tta-tg
aggctctgtaattggaatgagataac-tttaaatcc-ttt-atcgaggaacaattgg-ag
ggcaag-tctggtgccagcagccgcggtaattccagct-ccaatagcgtatactaaaatt
gttgcagttaaaaagcgcgtagttggatctcaggttgtg--------gttgactgc-agt
agca-tc-----------t------tgttacttgttgtc-ttcccaccttatt-------
-----agttata-g-cggcagcttgtgctcttaactgagtg-ca--gg-ttgtgcataac
atgtttactttgaaaaaattagagtgctcaaagcaggc-t-tt--tttgcttgtatac-t
gt-tgcatggaataatggaatatgactct---gcc-gct-attttgtt-g-gttttc-ag
t-actatatgc-agagtaa-tgattaaaaggaacagcacgggggcaaaagtatggccgcg
atagaggtga---aattcttggaccgtggtcagactaac-tactgcgaaagcatttgcca
agaatgttttcattaatcaagcacgaaattttgaggatcgaagacgatcagataccgt-c
ctagttcaaaatataaactatgccatctgtct-attagaacg----ct--------tata
acggtgttctagcagac-cctc-agggaaacca--agag---aggttctggggggaatat
ggt-cgcaagtccgaaacttaaaggaattgacggaagggcaccaccaggagtggagcctg
cggcttaatttgactcaacacgggaaaactcacccggcccggacactgtcaggattgaca
gat--tgatagctctttcatgattcggtggatggtggtgcatggccgttcttagttggtg
gagtgatttgtctggttaa--ttccgataacgaacgagactctagcctgc-taaatag--
---tatt--tctatacctag----------tggtt--------------cgccacgacgg
tagtagcaat---aa--tac-ttcttagagggattgg-tgg------cattta--gtcac
atgaaa-tagagcaataacaggtctgtgatgccctta-gatgtccggggccgcac-----
----------------------------------gcgcg-ctacaatgatagtggcagaa
aga-------tgatggtccgaaa-ggactatcaaatc-a--ttaatcactatctcgtcag
ggatcagggtttgtaattatcccctgtgaacgaggaattcccagtaagcgcaagtcatca
acttgtgctgattacgtccctgccctttgtacacaccgcccgtcgctactaccgattgaa
tggtttagtgaggttaccggatcggtgacacagc-a--t-ggc---------------aa
catgcc---agtg-ttgctgag-aaag-caatcgaac-ttgatcatttagaggaag--t-
aaaagtcgtaacaaggtt-tccgtaggtgaacctgc-aga-tggatca------------
------------------------------------------------------------
------------------------------------------------------------
------------------------------------------------------------
------------------------------------------------------------
------------------------------------------------------------
-----------
>KC529501_Bothromesostoma_personatum
------------------------------------------------------------
----tg-gtt-gatcctgccagcagtcat-atgcttgtctcaaagattaag-ccatgcat
gtccaagttcaca-cc-t-tagc-acggtgaaaccgcg-gatggctcattaaatcagcta
ttgtttcttagatctta-ccca-ta-tacatgg--ataactacagtaattctg-gagcta
ataca-tgcc--g--attatgccttggcttt-a----------ttgcctgggc-gggttt
attag-atca--aaacca-ac-cagc--c-------ttt---------acg-g-gc-tg-
a-ggg------------------tttga-tg-actccggataac-ca-ac--ctaatcgc
acaa-cc--ttgtgttggcgatatctc-ttccaagtatctgacctatca-tctgtcgatg
gtgagttaaatgctca-ccatggagataacgggtaacggggaatctgtgttcgattccgg
agagggag-ccttagaaacggctaccacatctaaggaaggcagcaggcgcgcaaattacc
cactctcagag----agaggaggtagtga-cgaaaaataacgatgcaagactc-attatg
aggccttgcaatcggaatgagtacaa-tttaaatcc-ttt-aacgaggatcaattgg-ag
ggcaag-tctggtgccagcagccgcggtaattccagct-ccaatagcgtatattgatttt
gttgcagttaaaaagctcgtagttggatctgaggtg-gg-------agtcg-tcggtttc
agc-tt-----gcgctg-t---------tactgta-cgt-gctctaccttaat-------
-c---agtcattagacactctatggtgctctttactgagtgcta--ta-gagtgcatggc
acgtttactttgaaaaaattaaagtgctcaaagcaggcct--t--agtgcttgtatac-t
ct-tgcatggaataatggaataggacttc---ggt-tct-attttgtt-g-gttttc-gg
a-a------cc-ggagtaa-tgattaaaagggactg-ccgggggcatatgtattgtgggg
ttagaggtga---aattcttggatccccgcaagacatcc-tactgcgaaagcatttgcca
agaatgtcttcattaatcaagaacgaaagtcagaggttcgaagacgatcagataccgt-c
ctagttctgaccataaacgttgccgacccaca-gtcaagggtgg-ttt---gtct-taat
ggaccctcttggctg-t-ccct-gggaaacc-ttaagta---aggttctggggggaatat
ggt-cgcaaggccgaaacttaaaggaattgacggaagggcaccaccaggagtggagcctg
cggcttaatttgactcaacacggggaaactcacccggcccggacactgtaaggatggaca
gat--taaaagctctttcttgattcagtgggtggtggtgcatggccgttcttagttggtg
gagtgatttgtctggttaa--ttccgataacgaacgagactcttacctgc-taaatag--
---taca--tcagtattgacat----------cctt---------------g--tggtgt
tcaa-gctggt-gct--gac-ttcttagagggattcg-cagta------ttta-aactgc
acgaga-tagagcaataacaggtctgtgatgccctta-gatgtccggggccgcac-----
----------------------------------gcgcg-ctacaatgacagcttcagag
agtatta-aaacctggtccgaaa-ggattgggaaatctt--tcaatggctgtctcctcag
ggattggggtttgtaactatcccccatgaacgaggaattcccagtaggcgcaagtcatca
gcttgcgccgattacgtccctgccctttgtacacaccgcccgtcgctactaccgattgaa
tggtttagtgaggtcctcggactgtggtcttggc-g--g-tgg----------caacact
gc-------tttg-attgtggg-aaga-cgatcgaac-ttgatcatttagaggaag--t-
aaaagtcgtaacaaggtt-tccgtaggtgaacctgc-aga-tggat--------------
------------------------------------------------------------
------------------------------------------------------------
------------------------------------------------------------
------------------------------------------------------------
------------------------------------------------------------
-----------
>KC529500_Rhynchomesostoma_rostratum
------------------------------------------------------------
tacctg-gtt-gatcctgccagcagtcat-atgcttgtctcaaagattaag-ccatgcat
gtcaaagttcacg-cc-t-ttac-acggcgaaaccgcg-aatggctcattaaatcagcta
ttgtttcttagatctta--cca-tactacttgg--ataactgcagtaattctg-gagcta
ataca-tgcc--a--a-tatgccgcggcttt-a----------ttgctgaggc-gggttt
attag-atca--aaacca-ac-cggt--c-------tta---------acg-g-gc-tg-
t-ggg------------------tttga-tg-actctggataac-ca-ac--ctaatcgc
atga-cc--ttgcgtcggcgatgtatc-tttcaagtatctgacctatca-tctgtcgatg
gtgagtgatatgctca-ccatggagataacgggtaacggggaatcagtgttcgattccgg
agagggag-ccttagaaacggctaccacatctaaggaaggcagcaggcgcgcaaattacc
cactctcagcg----agaggaggtagtga-cgaaaaataacgatgcaagactc-attacg
aggccttgcaattggaatgagtacaa-tttaaatcc-ttt-aacgaggatccattgg-ag
ggcaag-tctggtgccagcagccgcggtaattccagct-ccaatagcgtatattgaagtt
gttgcagttaaaaagctcgtagttggatctgaggtg-gg-------attcg-tcag-ttc
agc-tt-----ttgctg-c---------gactgca-cgt-gatctaccttaca-------
-c---agtcattagacgcttagtggtgctctttattgagtgctg--ct-gagtgcatggc
acgtttactttgaaaaaattaaagtgctcaaagcaggcct-----agtgcttgtatac-t
ct-tgcatggaataatggaataggacttc---ggt-tct-attttgtt-g-gttttc-gg
a-c------cc-ggagtaa-tgattaaaagagactg-ccgggggcatttgtatggtggcg
ttagaggtga---aattcttggatcgccgccagacaatc-tactgcgaaagcatttgcca
agaatgtcttcattaatcaagaacgaaagtcagaggttcgaagacgatcagataccgt-c
ctagttctgaccataaacgttgccgaccaaca-atcgggggtgg-ttt---gact-attt
tgaccctcctggctg-t-ccct-gggaaacc-ttaagta---aggttctggggggaatat
ggt-cgcaaggccgaaacttaaaggaattgacggaagggcaccaccaggagtggagcctg
cggcttaatttgactcaacacggggaaactcacccggcccggacactgtaaggatggaca
gat--taaaagctctttcttgattcagtgggtggtggtgcatggccgttcttagttggtg
gagtgatttgtctggttaa--ttccgataacgaacgagactctgacctgc-taaatag--
---tacg--ttggtattggcac----------ttagcaa------------t--aagtgt
tcta-gccgac-gct--gac-ttcttagagggattcg-cagta------ttta-aactgc
acgaaa-tagagcaataacaggtctgtgatgccctta-gatgtccggggccgcac-----
----------------------------------gcgcg-ctacaatgacagcttcagag
agtttta-caacctggtccgaga-ggattgggaaatctt--tgcatggctgtctcctcag
ggattggggtttgtaactgtcccccatgaacgaggaattcccagtaggcgcaagtcatca
gcttgcgccgattacgtccctgccctttgtacacaccgcccgtcgctactaccgattgaa
tggtttagtgaggtcctcggatcgcggtctttgc-g--g-tgg----------caacact
gc-------tttg-attgtgaa-aaga-cgatcgaac-ttgatcatttagaggaag--t-
aaaagtcgtaacaaggtt-tccgtaggtgaacctgc-aga-tggatcaa-----------
------------------------------------------------------------
------------------------------------------------------------
------------------------------------------------------------
------------------------------------------------------------
------------------------------------------------------------
-----------
>KC529499_Rhynchomesostoma_rostratum
------------------------------------------------------------
-------------tcctgccagcagtcat-atgcttgtctcaaagattaag-ccatgcat
gtcaaagttcacg-cc-t-taac-acggcgaaaccgcg-aatggctcattaaatcagcta
ttgtttcttagatctta--cca-tactacttgg--ataactgcagtaattctg-gagcta
ataca-tgcc--a--a-tatgccgcggcttt-a----------ttgctgaggc-gggttt
attag-atca--aaacca-ac-cggt--c-------tta---------acg-g-gc-tg-
t-ggg------------------tttga-tg-actctggataac-ca-ac--ctaatcgc
atga-cc--ttgcgtcggcgatgtatc-tttcaagtatctgacctatca-tctgtcgatg
gtgagtgatatgctca-ccatggagataacgggtaacggggaatcagtgttcgattccgg
agagggag-ccttagaaacggctaccacatctaaggaaggcagcaggcgcgcaaattacc
cactctcagcg----agaggaggtagtga-cgaaaaataacgatgcaagactc-attacg
aggccttgcaattggaatgagtacaa-tttaaatcc-ttt-aacgaggatccattgg-ag
ggcaag-tctggtgccagcagccgcggtaattccagct-ccaatagcgtatattgaagtt
gttgcagttaaaaagctcgtagttggatctgaggtg-gg-------attcg-tcag-ttc
agc-tt-----ttgctg-c---------gactgca-cgt-gatctaccttaca-------
-c---agtcattagacgcttagtggtgctctttattgagtgctg--ct-gagtgcatggc
acgtttactttgaaaaaattaaagtgctcaaagcaggcct-----agtgcttgtatac-t
ct-tgcatggaataatggaataggacttc---ggt-tct-attttgtt-g-gttttc-gg
a-c------cc-ggagtaa-tgattaaaagagactg-ccgggggcatttgtatggtggcg
ttagaggtga---aattcttggatcgccgccagacaatc-tactgcgaaagcatttgcca
agaatgtcttcattaatcaagaacgaaagtcagaggttcgaagacgatcagataccgt-c
ctagttctgaccataaacgttgccgaccaaca-atcgggggtgg-ttt---gact-attt
tgaccctcctggctg-t-ccct-gggaaacc-ttaagta---aggttctggggggaatat
ggt-cgcaaggccgaaacttaaaggaattgacggaagggcaccaccaggagtggagcctg
cggcttaatttgactcaacacggggaaactcacccggcccggacactgtaaggatggaca
gat--taaaagctctttcttgattcagtgggtggtggtgcatggccgttcttagttggtg
gagtgatttgtctggttaa--ttccgataacgaacgagactctgacctgc-taaatag--
---tacg--ttggtattggcgc----------ttagcaa------------t--aagtgt
tcta-gccgac-gct--gac-ttcttagagggattcg-cagta------ttta-aactgc
angaaa-tagagcaataacaggtctgtgatgccctta-gatgtccggggccgcac-----
----------------------------------gcgcg-ctacaatgacagcttcagag
agtttta-caacctggtccgaga-ggattgggaaatctt--tgcatggctgtctcctcag
ggattggggtttgtaactgtcccccatgaacgaggaattcccagtaggcgcaagtcatca
gcttgcgccgattacgtccctgccctttgtacacaccgcccgtcgctactaccgattgaa
tggtttagtgaggtcctcggatcgcggtctttgc-g--g-tgg----------caacact
gc-------tttg-attgtgaa-aaga-cgatcgaac-ttgatcatttagaggaag--t-
aaaagtcgtaacaaggtt-tccgtaggtgaacctgc-aga-tggatc-------------
------------------------------------------------------------
------------------------------------------------------------
------------------------------------------------------------
------------------------------------------------------------
------------------------------------------------------------
-----------
>KC529498_Castrada_neocomensis
------------------------------------------------------------
----tg-gtt-gatcctgccagcagtcat-atgcttgtctcaaagattaag-ccatgcat
gtccaagttcacg-cc-t-ttat-acggcgaaaccgcg-aatggctcattaaatcagcta
ttgtttcttagatctta--cca-tactacatgg--ataactgcagtaattctg-gagcta
ataca-tgcc--a--a-tatgccttggcttt-a----------ttgctgaggc-gggttt
attag-atca--aaacca-ac-cggc--c-------ttc---------acg-g-gc-tg-
t-ggg------------------tttga-tg-actctggataac-ca-ac--ctaatcgc
atga-cc--ttgcgtcggcgatgcatc-ttccaagtatctgacctatca-tctgtcgatg
gtgagtgatatgctca-ccatggagataacgggtaacggggaatcagtgttcgattccgg
agagggag-ccttagaaacggctaccacatctaaggaaggcagcaggcgcgcaaattacc
cactctcagcg----agaggaggtagtga-cgaaaaataacgatgcaagactc-attatg
aggccttgcaattggaatgagtacaa-tttaaatcc-ttt-aacgaggatccattgg-ag
ggcaag-tctggtgccagcagccgcggtaattccagct-ccaatagcgtatattgaagtt
gttgcagttaaaaagctcgtagttggatctgaggtg-gg-------attcg-tcag-ttc
agc-tt-----gcgctg-c---------gactgta-cgt-gatctaccttaca-------
-c---agtcattagacgctctgtggtgctctttattgagtgctg--cg-gagtgcatggc
acgtttactttgaaaaaattaaagtgctcaaagcaggcct-----agtgcttgtatac-t
ct-tgcatggaataatggaataggacttc---ggt-tct-attttgtt-g-gttttc-gg
a-c------cc-ggagtaa-tgattaaaagagactg-ccgggggcatttgtatggtggcg
ttagaggtga---aattcttggatcgccgccagacaatc-tactgcgaaagcatttgcca
agaatgtcttcattaatcaagaacgaaagtcagaggttcgaagacgatcagataccgt-c
ctagttctgaccataaacgttgccgaccaaca-atcgggggtgg-ttt---gact-ttat
tgaccctcctggctg-t-ccct-gggaaacc-ttaagta---aggttctggggggaatat
ggt-cgcaaggccgaaacttaaaggaattgacggaagggcaccaccaggagtggagcctg
cggcttaatttgactcaacacggggaaactcacccggcccggacactgtaaggatggaca
gat--taaaagctctttcttgattcagtgggtggtggtgcatggccgttcttagttggtg
gagtgatttgtctggttaa--ttccgataacgaacgagactctgacctgc-taaatag--
---tacg--tcggtattggcat----------tcagcaa------------t--gagtgc
tcta-gctggc-gct--gac-ttcttagagggattcg-cagta------ttta-aactgc
acgaaa-tagagcaataacaggtctgtgatgccctta-gatgtccggggccgcac-----
----------------------------------gcgcg-ctacaatgacagcttcagag
agttttg-caacctggtccgaga-ggattgggaaatctt--tgcatggctgtctcctcag
ggattggggtttgtaactgtcccccatgaacgaggaattcccagtaggcgcaagtcatca
gcttgcgccgattacgtccctgccctttgtacacaccgcccgtcgctactaccgattgaa
tggtttagtgaggtcctcggatcgcggtctttgc-g--a-tgg----------caacatt
gc-------attg-attgtgag-aaga-cgatcgaac-ttgatcatttagaggaag--t-
aaaagtcgtaacaaggtt-tccgtaggtgaacctgc-aga-tggat--------------
------------------------------------------------------------
------------------------------------------------------------
------------------------------------------------------------
------------------------------------------------------------
------------------------------------------------------------
-----------
>KC529496_Castrada_hofmanni
------------------------------------------------------------
----tg-gtt-gatcctgccagcagtcat-atgcttgtctcaaagattaag-ccatgcat
gtccaagttcacg-cc-t-ttat-acggcgaaaccgcg-aatggctcattaaatcagcta
ttgtttcttagatctta--cca-tactacatgg--ataactgcagtaattctg-gagcta
ataca-tgcc--a--a-tatgctttggcttt-a----------ttgctgaggc-gggttt
attag-atca--aaacca-ac-cggc--c-------ttc---------acg-g-gc-tg-
t-ggg------------------tttga-tg-actctggataac-ca-ac--ctaatcgc
atga-cc--ttgcgtcggcgatgcatc-ttccaagtatctgacctatca-tctgtcgatg
gtgagtgatatgctca-ccatggagataacgggtaacggggaatcagtgttcgattccgg
agagggag-ccttagaaacggctaccacatctaaggaaggcagcaggcgcgcaaattacc
cactctcagcg----agaggaggtagtga-cgaaaaataacgatgcaagactc-attatg
aggccttgcaattggaatgagtacaa-tttaaatcc-ttt-aacgaggatccattgg-ag
ggcaag-tctggtgccagcagccgcggtaattccagct-ccaatagcgtatattgaagtt
gttgcagttaaaaagctcgtagttggatctgaggtg-gg-------attcg-tcag-ttc
agc-tt-----gcgctg-c---------gactgta-cgt-gatctaccttaca-------
-c---agtcattagacgctctgtggtgctctttgctgggtgctg--ca-gagtgcatggc
acgtttactttgaaaaaattaaagtgctcaaagcaggcct-----tgtgcttgtatac-t
ct-tgcatggaataatggaataggacttc---ggt-tct-attttgtt-g-gttttc-gg
a-c------cc-ggagtaa-tgattaaaagagactg-ccgggggcatttgtatggtggcg
ttagaggtga---aattcttggatcgccgccagacaatc-tactgcgaaagcatttgcca
agaatgtcttcattaatcaagaacgaaagtcagaggttcgaagacgatcagataccgt-c
ctagttctgaccataaacgttgccgaccaaca-atcgggggtgg-ttt---gact-ttat
tgaccctcctggctg-t-ccct-gggaaacc-ttaagta---aggttctggggggaatat
ggt-cgcaaggccgaaacttaaaggaattgacggaagggcaccaccaggagtggagcctg
cggcttaatttgactcaacacggggaaactcacccggcccggacactgtaaggatggaca
gat--taaaagctctttcttgattcagtgggtggtggtgcatggccgttcttagttggtg
gagtgatttgtctggttaa--ttccgataacgaacgagactctgacctgc-taaatag--
---tacg--tcggtattggcat----------tcagcaa------------t--gagtgc
tcta-gccggc-gct--gac-ttcttagagggattcg-tagta------ttta-agctgc
aagaaa-tagagcaataacaggtctgtgatgccctta-gatgtccggggccgcac-----
----------------------------------gcgcg-ctacaatgacagcttcagag
agttttg-caacctggtccgaga-ggattgggaaatctt--tgcatggctgtctcctcag
ggattggggtttgtaactgtcccccatgaacgaggaattcccagtaggcgcaagtcatca
gcttgcgccgattacgtccctgccctttgtacacaccgcccgtcgctactaccgattgaa
tggtttagtgaggtcctcggatcgcggtctttgc-g--a-tgg----------caacatt
gc-------tttg-attgtgag-aaga-cgatcgaac-ttgatcatttagaggaag--t-
aaaagtcgtaacaaggtt-tccgtaggtgaacctgc-aga-tggat--------------
------------------------------------------------------------
------------------------------------------------------------
------------------------------------------------------------
------------------------------------------------------------
------------------------------------------------------------
-----------
>KC529497_Castrada_intermedia
------------------------------------------------------------
----tg-gtt-gatcctgccagcagtcat-atgcttgtctcaaagattaag-ccatgcat
gtccaagttcacg-cc-t-ttat-acggcgaaaccgcg-aatggctcattaaatcagcta
ttgtttcttagatctta--cca-tactacatgg--ataactgcagtaattctg-gagcta
ataca-tgcc--a--a-tatgccttggcttt-a----------ttgctgaggc-gggttt
attag-atca--aaacca-ac-cggc--c-------ttc---------acg-g-gc-tg-
t-ggg------------------tttga-tg-actctggataac-ca-ac--ctaatcgc
atga-cc--ttgcgtcggcgatgaatc-ttccaagtatctgacctatca-tctgtcgatg
gtgagtgatatgctca-ccatggagataacgggtaacggggaatcagtgttcgattccgg
agagggag-ccttagaaacggctaccacatctaaggaaggcagcaggcgcgcaaattacc
cactctcagcg----agaggaggtagtga-cgaaaaataacgatgcaagactc-attacg
aggccttgcaattggaatgagtacaa-tttaaatcc-ttt-aacgaggatccattgg-ag
ggcaag-tctggtgccagcagccgcggtaattccagct-ccaatagcgtatattgaagtt
gttgcagttaaaaagctcgtagttggatctgaggtg-gg-------attcg-tcag-ttc
agc-tt-----gcgctg-c---------gactgta-cgt-gatctaccttaca-------
-c---agtcattagacgctctgtggtgctctttattgagtgctg--cg-gagtgcatggc
acgtttactttgaaaaaattaaagtgctcaaagcaggcct-----agtgcttgtatac-t
ct-tgcatggaataatggaataggacttc---ggt-tct-attttgtt-g-gttttc-gg
a-c------cc-ggagtaa-tgattaaaagagactg-ccgggggcatttgtatggtggcg
ttagaggtga---aattcttggatcgccgccagacaatc-tactgcgaaagcatttgcca
agaatgtcttcattaatcaagaacgaaagtcagaggttcgaagacgatcagataccgt-c
ctagttctgaccataaacgttgccgaccaaca-atcgggggtgg-ttt---gact-ttat
tgaccctcctggctg-t-ccct-gggaaacc-ttaagta---aggttctggggggaatat
ggt-cgcaaggccgaaacttaaaggaattgacggaagggcaccaccaggagtggagcctg
cggcttaatttgactcaacacggggaaactcacccggcccggacactgtaaggatggaca
gat--taaaagctctttcttgattcagtgggtggtggtgcatggccgttcttagttggtg
gagtgatttgtctggttaa--ttccgataacgaacgagactctgacctgc-taaatag--
---tacg--tcggtattggcat----------tcagcaa------------t--gagtgc
tcta-gccggc-gct--gac-ttcttagagggattcg-cagta------ttta-aactgc
acgaaa-tagagcaataacaggtctgtgatgccctta-gatgtccggggccgcac-----
----------------------------------gcgcg-ctacaatgacagcttcagag
agttttg-caacctggtccgaga-ggattgggaaatctt--tgcatggctgtctcctcag
ggattggggtttgtaactgtcccccatgaacgaggaattcccagtaggcgcaagtcatca
gcttgcgccgattacgtccctgccctttgtacacaccgcccgtcgctactaccgattgaa
tggtttagtgaggtcctcggatcgtggtttttgc-g--a-tgg----------caacatt
gc-------attg-actgtgag-aaga-cgatcgaac-ttgatcatttagaggaag--t-
aaaagtcgtaacaaggtt-tccgtaggtgaacctgc-aga-tggat--------------
------------------------------------------------------------
------------------------------------------------------------
------------------------------------------------------------
------------------------------------------------------------
------------------------------------------------------------
-----------
>KC529495_Dochmiotrema_limicola
------------------------------------------------------------
--------------cctgccagcagtcat-atgcttgtctcaaagattaag-ccatgcat
gtccaagttcacg-cc-t-ttat-acggcgaaaccgcg-aatggctcattaaatcagcta
ttgtttcttagatctta--cca-tactacatgg--ataactgcagtaattctg-gagcta
ataca-tgcc--a--a-tatgccagggcttt-a----------ttgctcgggc-gggttt
attag-atca--aaacca-ac-cagc--t-------ct-----------cg-g-gc-tg-
t-ggg------------------tttga-tg-actctggataac-ca-ac--ctgatcgc
atga-cc--ttgcgtcggcgacaattc-ttccaagtatctgacctatca-tctgtcgatg
gtgagtgatatgctca-ccatggagatcacgggtaacggggaatcagtgttcgattccgg
agagggag-ccttagaaacggctaccacatctaaggaaggcagcaggcgcgcaaattacc
cactctcagcg----agaggaggtagtga-cgaaaaataacgatgcgagactc-acattg
aggcctcgcaattggaatgagtacaa-tttaaatcc-ttt-aacgaggatccattgg-ag
ggcaag-tctggtgccagcagccgcggtaattccagct-ccaatagcgtatattgaagtt
gttgcagttaaaaagctcgtagttggatctgaggtg-gg-------agtcg-tcag-ttc
agc-tt-----gcgctg-t---------gactgta-cgt-gctctgccttaca-------
-c---agtcattagacagtttgcggtgctcttcactgagtgctg--ta-gactgcatggc
acgtttactttgaaaaaattaaagtgttcaaagcaggcct--c--agagcttgtatag-t
ct-tgcatggaataatggaataggacttc---ggt-tct-attttgtt-g-gttttc-gg
a-c------cc-ggagtaa-tgattaaaagagactg-ccgggggcatttgtatggtggcg
ttagaggtga---aattcttggatcgccgccagacaatc-tactgcgaaagcatttgcca
agaatgtcttcattaatcaagaacgaaagtcagaggttcgaagacgatcagataccgt-c
ctagttctgaccataaacgttgccgaccaaca-atcgggggtgg-ttt---gact-ttat
tgaccctcccggctg-t-ccct-gggaaacc-ttaagta---aggttctggggggaatat
ggt-cgcaaggccgaaacttaaaggaattgacggaagggcaccaccaggagtggagcctg
cggcttaatttgactcaacacggggaaactcacccggcccggacactgtaaggatggaca
gat--taaaagctctttcttgattcagtgggtggtggtgcatggccgttcttagttggtg
gagtgatttgtctggttaa--ttccgataacgaacgagactctggcctgc-taaatag--
---tacg--tcagtattggttc----------tcagcaa------------t--gggaat
tcta-gctggc-gct--gac-ttcttagagggatacg-cagta------tcca-aactac
aagaaa-tagagcaataacaggtctgtgatgccctta-gatgtccggggccgcac-----
----------------------------------gcgcg-ctacaatgacagtttcagag
agttttg-caacctggtccgaaa-ggattgggaaatctt--ggcatagctgtctcctcag
ggattggggcttgtaactattccccatgaacgaggaattcccagtaggcgcaagtcatca
gcttgcgccgattacgtccctgccctttgtacacaccgcccgtcgctactaccgattgaa
tggtttagtgaggtcctcggattgcggcttttgc-g--a-tgg----------caacatt
gc-------ttga-gttgtgag-aaga-cgatcgaac-ttgatcatttagaggaag--t-
aaaagtcgtaacaaggtt-tccgtagg---------------------------------
------------------------------------------------------------
------------------------------------------------------------
------------------------------------------------------------
------------------------------------------------------------
------------------------------------------------------------
-----------
>KC529494_Olisthanella_truncula
------------------------------------------------------------
tacctg-gtt-gatcctgccagcagtcat-atgcttgtctcaaagattaag-ccatgcat
gtccaagttcacg-cc-t-taat-acggcgaaaccgcg-aatggctcattaaatcagcta
ttgtttcttagatctta--ccc-agttacatgg--ataactgcagtaattctg-gagcta
ataca-tgcc--a--a-tatgcctcggcttc-a----------ttgctgaggc-gggttt
attag-atca--aaacca-ac-cggt--c-------cgc---------aag-g-ac-tg-
t-ggg------------------tttga-tg-actctggataac-ca-ac--ctgatcgc
atga-cc--ttgcgtcggcgacaattc-ttccaagtatctgacctatca-tctgtcgatg
gtgagtgatatgctca-ccatggagataacgggtaacggggaatcagtgttcgattccgg
agagggag-ccttagaaacggctaccacatctaaggaaggcagcaggcgcgcaaattacc
cactctcagcg----agaggaggtagtga-cgaaaaataacgatgcaagactc-attacg
aggccttgcaattggaatgagtacaa-tttaaatcc-ttt-aacgaggatccattgg-ag
ggcaag-tctggtgccagcagccgcggtaattccagct-ccaatagcgtatattgaagtt
gttgcagttaaaaagctcgtagttggatctgaggtg-gg-------agtcg-tcag-ttc
agc-tt-----gcgctg-t---------gactgta-cgt-gctctgccttaaa-------
-c---agtcattagacgctctgcggtgctctttactgagtgctg--tg-gagtgcatggc
acgtttactttgaaaaaattaaagtgctcaaagcaggcct--t--tgtgcttgtatac-t
ct-tgcatggaataatggaataggacttc---ggt-tct-attttgtt-g-gttttc-gg
a-c------cc-ggagtaa-tgattaaaagagactg-ccgggggcatttgtatggtggcg
ttagaggtga---aattcttggatcgtcgccagacaatc-tactgcgaaagcatttgcca
agaatgtcttcattaatcaagaacgaaagtcagaggttcgaagacgatcagataccgt-c
ctagttctgaccataaacgttgccgaccaaca-atcaggggtgg-ttt---gact-ttat
tgaccctcctggctg-t-ccct-gggaaacc-ttaagta---aggttctggggggaatat
ggt-cgcaaggccgaaacttaaaggaattgacggaagggcaccaccaggagtggagcctg
cggcttaatttgactcaacacggggaaactcacccggcccggacactgtaaggatggaca
gat--taaaagctctttcttgattcagtgggtggtggtgcatggccgttcttagttggtg
gagtgatttgtctggttaa--ttccgataacgaacgagactctgacctgc-taaatag--
---tacg--tcagtattgatac----------tctttta------------a--gagtgt
tcta-gctggc-gct--gac-ttcttagagggattcg-cagta------ttta-aactgc
acgaga-tagagcaataacaggtctgtgatgccctta-gatgtccggggccgcac-----
----------------------------------gcgcg-ctacaatgacagcttcagag
agtattg-caacctggcccgaga-gggttgggaaacctt--tgcatagctgtctcctcag
ggattggggtttgtaactatcccccatgaacgaggaattcccagtaggcgcaagtcatca
gcttgcgccgattacgtccctgccctttgtacacaccgcccgtcgctactaccgattgaa
tggtttagtgaggtcatcggattgcggtcctcgc-g--a-tgg----------caacatt
gc-------ttgg-attgtgag-aaga-cgatcgaac-ttgatcatttagaggaag--t-
aaaagtcgtaacaaggtt-tccgtaggtgaacctgc-aga-tggatcaa-----------
------------------------------------------------------------
------------------------------------------------------------
------------------------------------------------------------
------------------------------------------------------------
------------------------------------------------------------
-----------
>KC529493_Phaenocora_spn_NVS2013
------------------------------------------------------------
-----------------gccagcagtcat-atgcttgtctcaaagattaag-ccatgcat
gtccaagttcacg-cc-t-ttac-acggcgaaaccgcg-aatggctcattaaatcagcta
ttgtttcttagatctta--cca-tcctacatgg--ataactgcagtaattctg-gagcta
ataca-tgcc--a--a-tatgcctcggcttt-a----------ttgctgaggc-gggttt
attag-atca--aaacca-ac-cagt--c-------ttc---------acg-g-ac-tg-
t-ggg------------------tttga-tg-actctggataac-ca-ac--ctgatcgc
atga-cc--ttgcgtcggcgacaattc-ttccaagtatctgacctatca-tctgtcgatg
gtgagtgatatgctca-ccatggagatcacgggtaacggggaatcagtgttcgattccgg
agagggag-ccttagaaacggctaccacatctaaggaaggcagcaggcgcgcaaattacc
cactctcagcg----agaggaggtagtga-cgaaaaataacgatgcaagactc-attacg
aggccttgcaattggaatgagtacaa-tttaaatcc-ttt-aacgaggatccattgg-ag
ggcaag-tctggtgccagcagccgcggtaattccagct-ccaatagcgtatattgaagtt
gttgcagttaaaaagctcgtagttggatctgaggtg-gg-------agtcg-tcag-ttc
agc-tt-----gcgctg-c---------gactgta-cgt-gctctaccttaca-------
-c---agtcattagacgctctgtggtgctctttactgagtgctg--cg-gagtgcatggc
acgtttactttgaaaaaattaaagtgctcaaagcaggcct--c--agtgcttgtatac-t
ct-tgcatggaataatggaataggacttc---ggt-tct-attttgtt-g-gttttc-gg
a-c------cc-ggagtaa-tgattaaaagagactg-ccgggggcatttgtatggtggcg
ttagaggtga---aattcttggatcgccgccagacaatc-tactgcgaaagcatttgcca
agaatgtcttcattaatcaagaacgaaagtcagaggttcgaagacgatcagataccgt-c
ctagttctgaccataaacgttgccgaccaaca-atcaggggtgg-ttt---gact-ttat
tgaccctcctggctg-t-ccct-gggaaacc-ttaagta---aggttctggggggaatat
ggt-cgcaaggccgaaacttaaaggaattgacggaagggcaccaccaggagtggagcctg
cggcttaatttgactcaacacggggaaactcacccggcccggacactgtaaggatggaca
gat--taaaagctctttcttgattcagtgggtggtggtgcatggccgttcttagttggtg
gagtgatttgtctggttaa--ttccgataacgaacgagactctgacctgc-taaatag--
---tacg--tcggtattgacat----------ccagcaa------------t--gggtgt
tcta-gccggc-gct--gac-ttcttagagggattcg-cagta------ttca-aactgc
acgaga-tagagcaataacaggtctgtgatgccctta-gatgtccggggccgcac-----
----------------------------------gcgcg-ctacaatgacagcttcagag
agttttg-caacctggtccgaga-ggatcgggaaatctt--tgcatagctgtctcctcag
ggattggggtttgtaactgtcccccatgaacgaggaattcccagtaggcgcaagtcatca
gcttgcgccgattacgtccctgccctttgtacacaccgcccgtcgctactaccgattgaa
tggtttagtgaggtcctcggatcgcggtctttgc-g--a-tgg----------caacatt
gc-------ttgg-attgtgag-aaga-cgatcgaac-ttgatcatttagaggaag--t-
aaaagtcgtaacaaggtt-tccgtaggtgaacct--------------------------
------------------------------------------------------------
------------------------------------------------------------
------------------------------------------------------------
------------------------------------------------------------
------------------------------------------------------------
-----------
>KC529492_Phaenocora_foliacea
------------------------------------------------------------
------------------ccagcagtcat-atgcttgtctcaaagattaag-ccatgcat
gtccaagttcacg-cc-a-tatc-acggcgaaaccgcg-aatggctcattaaatcagcta
ttgtttcttagatctta--cca-tactacatgg--ataactgcagtaattctg-gagcta
ataca-tgcc--a--attatgcttcggcttc-a----------ttgctgaggc-gggttt
attagaatca--aaacca-atacagt--t-------tt-----------cg-g-ac-tg-
t-ggg------------------tttga-tg-actctggataac-ca-ac--ctaatcgc
acga-cc--ttgcgtcggcgacagttc-ttccaagtatctgacctatca-tctgtcgatg
gtgagttaaatgctca-ccatggagataacgggtaacggggaatctgtgttcgattccgg
agagggag-ccttagaaacggctaccacatctaaggaaggcagcaggcgcgcaaattacc
cactctcagcg----agaggaggtagtga-cgaaaaataacgatgcaaaactc-attacg
aggctttgcaattggaatgagaacaa-tttaaatcc-ttt-aacgaggatccattgg-ag
ggcaag-tctggtgccagcagccgcggtaattccagct-ccaatagcgtatattgaagtt
gttgcagttaaaaagctcgtagttggatctgaggtg-gg-------agtcg-tcag-ttc
agc-tc-----gcgctg-c---------aactgta-cgt-gctctaccttaca-------
-c---agtcatgagacattctgtggtgctctttgctgagtgctg--tg-gagtgcatgcc
tcgattactttgaaaaaattaaagtgcttaaagcaggcct--c--agtgcttgtatat-t
gt-tgcatggaataatggaataggacttc---ggt-tct-attttgtt-g-gttttc-gg
a-c------cc-gtagtaa-tgattaaaagagactg-ccgggggcatatgtatggtagcg
ttagaggtga---aattcttggatcgctgccagacaacc-tactgcgaaagcatttgcca
agaatgccttcattaatcaagaacgaaagtcagaggttcgaagacgatcagataccgt-c
ctagttctgaccataaacgttgccgaccaaca-atcgggggtggtttt---gact-ttat
tgaccctcctggctg-t-ccct-gggaaacc-ttaagta---aggttctggggggaatat
ggt-cgcaaggccgaaacttaaaggaattgacggaagggcaccaccaggagtggagcctg
cggcttaatttgactcaacacggggaaactcacccggcccggacactgtaaggatggaca
gat--taaaagctctttcttgattcagtgggtggtggtgcatggccgttcttagttggtg
gagtgatttgtctggttaa--ttccgataacgaacgagactctgtcctgc-taaatag--
---tacg--ttggtattttcat----------ccagcaa------------t--gggtga
tcta-actgac-gct--gac-ttcttagagggattcg-cagta------ttta-aactgc
acgaga-tagagcaataacaggtctgtgatgccctta-gatgtccggggccgcac-----
----------------------------------gcgcg-ctacaatgacagcttcataa
agtttga-caacctggtccgaaa-ggattgggaaatcta--tgaataactgtcacctcag
ggattggggtttgtaactgtcccccatgaacgaggaattcccagtaggcacaagtcatca
gcttgtgtcgattacgtccctgccctttgtacacaccgcccgtcgctactaccgattgaa
tggtttagtgaggtcttcggattgcggtctttgc-g--a-tgg----------caacatt
gc-------ttgg-attgtgag-aaga-tgatcgaac-ttgatcatttagaggaag--t-
aaaagtcgtaacaaggtt-tccgtaggtgaacctg-------------------------
------------------------------------------------------------
------------------------------------------------------------
------------------------------------------------------------
------------------------------------------------------------
------------------------------------------------------------
-----------
>KC529491_Opistomum_arsenii
------------------------------------------------------------
-------------tcctgccagcagtcat-atgcttgtctcaaagattaag-ccatgcat
gtcaaagttcacg-cc-t-tcat-acggcgaaaccgcg-aatggctcattaaatcagcta
ttgtttcttagatctta--ccc-agttacatgg--ataactgcagtaattctg-gagcta
ataca-tgcc--a--attataccgcagcttt-a----------ccgttgcggt-gggttt
attagaatca--aaacca-aa-cggt--c-------gc-----------aa-g-ac-tg-
t-cgg------------------tttga-tg-actccggataac-ct-ac--ctgatcgc
atga-cc--ttgtgtcggcgacatttc-ttccaagtatctgacctatca-actgtcgatg
gtgtgtgacatgctca-ccatggtgataacgggtaacggggaatcagtgttcgattccgg
agagggag-ccttagaaacggctaccacttctaaggaaggcagcaggcgcgcaaattacc
cactctcaggg----agaggaggtagtga-cgaataataacgatgcaagactc-attatg
aggccttgcaattggaatgagtacaa-tttaaatcc-ttt-aacgaggatccattgg-ag
ggcaag-tctggtgccagcagccgcggtaattccagct-ccaatagcgtatattgaagtt
gttgcagttaaaaagctcgtagttggatctgaggtg-ag-------agtcg-tgggttgt
gga-cg-----aaagtc-c---------caacttg-cgt-gctacgccttaca-------
-c---agtcattagacgctctgtggtgctcttcactgagtgctg--cg-gagtgcatggc
acgtttactttgaaaaaattagagtgctcaaagcaggcct--c--agcgcctgtatag-t
ct-tgcatggaataatggaataggacttc---ggt-tct-attttgtt-g-gttttc-gg
a-a------tc-ggagtaa-tgattaaaagggactg-ccgggggcatctgtatggtggtg
ttagaggtga---aattcttggatcaccgccagacatcc-tactgcgaaagcatttgcca
agaatgtcttcattaatcaagaacgaaagtcagaggttcgaagacgatcagataccgt-c
ctagttctgaccataaacgttgccgaccaaca-atcaggggtggtttg---ttct-ctat
tgaccctcctggttg-c-ctct-gggaaacc-tacagta---aggttctgggggaagtat
ggt-ctcaaggctgaaacttaaaggaattgacggaagggcaccaccaggagtggagcctg
cggcttaatttgactcaacacggggaaactcacccggcccggacactgtaaggatggaca
gat--taaaagctctttcttgattcagtgggtggtggtgcatggccgttcttagttggtg
gagtgatttgtctggttaa--ttccgataacgaacgagactctgacctgc-taaatag--
---cacg--tcggtattggcgctt------------------------------cggtgc
tcta-actgac-gct--ggc-ttcttagagggattcg-cagta------ttca-aactgc
aagaga-tagagcaataacaggtctgtgatgccctta-gatgtccggggccgcac-----
----------------------------------gcggg-ctacaatgacagtatcagag
agtattg-atacctggtccgaaa-ggattggggaatctg--cgaattactgtctcctcag
ggattgagacttgtaattatttctcatgaacgaggaattcccagtaggcgcaagtcatca
gcttgcgccgattacgtccctgccctttgtacacaccgcccgtcgctactaccgattgaa
tggtttagtgaggtcatcggattgagattcttgc-g--g-tgg----------caacact
gc-------atga-gttttgag-aaga-cgatcgaac-ttgatcatttagaggaag--t-
aaaagtcgtaacaaggtt-tccgtaggtgaacctgc-aga-tggat--------------
------------------------------------------------------------
------------------------------------------------------------
------------------------------------------------------------
------------------------------------------------------------
------------------------------------------------------------
-----------
>KC529490_Protoplanella_simplex
------------------------------------------------------------
-----------gatcctgccagcagtcat-atgcttgtctcaaagattaag-ccatgcat
gtccaagttcacg-cc-t-ttac-acggcgaaaccgcg-aatggctcattaaatcagcta
ttgtttcttagatctta--cca-tactacatgg--ataactgcagtaattctg-gagcta
ataca-tgcc--a--a-tatgccgtgacttt-a----------ttgtcagggc-gggttt
attagaatca--aaacca-tc-cagt--c-------ctt---------cgg-g-gc-tgt
t-ggg------------------tttgg-tg-actctggataac-ca-ac--ctgatcgc
atgg-cc--ttgtgccggcgacaaatc-tttcaagtatctgacctatca-tctgtcgatg
gtgagtgatttgctca-ccatggagatcacgggtaacggggaatcagtgttcgattccgg
agagggag-ccttagaaacggctaccacatctaaggaaggcagcaggcgcgcaaattacc
cactctcagcg----agaggaggtagtga-cgaaaaataacgatgcaagactc-attatg
aggccttgcaattggaatgagtacaa-tttaaatcc-ttt-aacgaggatccattgg-ag
ggcaag-tctggtgccagcagccgcggtaattccagct-ccaatagcgtatattgaagtt
gttgcagttaaaaagctcgtagttggatctgaggtg-gg-------agtcg-tcag-ttc
agc-tt-----gcgctg-t---------gactgta-cgt-gctccgccttaca-------
-c---agtcattagacactttgtggtgctctttactgagtgctg--ca-gagtgcatggc
acgtttactttgaaaaaattaaagtgttcaaagcaggcct--c--agagcttgtatac-t
ct-tgcatggaataatggaataggacttc---ggt-tct-attttgtt-g-gttttc-gg
a-c------cc-ggagtaa-tgattaaaagagactg-ccgggggcatttgtatggtggcg
ttagaggtga---aattcttggatcgccgccagacaatc-tactgcgaaagcatttgcca
agaatgtcttcattaatcaagaacgaaagtcagaggttcgaagacgatcagataccgt-c
ctagttctgaccataaactttgccgaccaaca-atcaggggtgg-ttt---gact-ttat
tgaccctcctggctg-t-ccct-gggaaacc-ttaagta---aggttctggggggaatat
ggt-cgcaaggccgaaacttaaaggaattgacggaagggcaccaccaggagtggagcctg
cggcttaatttgactcaacacggggaaactcacccggcccggacactgtaaggatggaca
gat--taaaagctctttcttgattcagtgggtggtggtgcatggccgttcttagttggtg
gagtgatttgtctggttaa--ttccgataacgaacgagactctgacctgc-taaatag--
---cacg--tcggtattggcac----------tctt---------------t--gagtgt
tcca-gccggg-gct--ggc-ttcttagagggattcg-cagta------ttta-aactac
aagaaa-tagagcaataacaggtctgtgatgccctta-gatgtccggggccgcac-----
----------------------------------gcgcg-ctacaatgacagctacagaa
agtcttg-caacctggtccgaaa-ggattgggaaatctt--ggcatagttgtctcctcag
ggattggggtttgtaactatcccccatgaacgaggaattcccagtaggcgcaagtcatca
gcttgcgccgattacgtccctgccctttgtacacaccgcccgtcgctactaccgattgaa
tggtttagtgaggtcctcggatcgcggtccttgc-g--a-tgg----------caacatt
gc-------ttgg-attgtgag-aaga-cgatcgaac-ttgatcatttagaggaag--t-
aaaagtcgtaacaaggtt-tccgtaggtgaacct--------------------------
------------------------------------------------------------
------------------------------------------------------------
------------------------------------------------------------
------------------------------------------------------------
------------------------------------------------------------
-----------
>KC529489_Bryoplana_xerophila
------------------------------------------------------------
--------------cctgccagcagtcat-atgcttgtctcaaagattaag-ccatgcat
gtccaagttcacg-cc-t-ttac-acggcgaaaccgcg-aatggctcattaaatcagcta
ttgtttcttagatctta--cca-tcctacatgg--ataactgcagtaattctg-gagcta
ataca-tgcc--a--a-tatgcctcggcttt-a----------ttgctgaggc-gggttt
attag-atca--aaacca-ac-cggt--c-------ctc---------acg-g-ac-tg-
c-ggg------------------tttga-tg-actctggataac-ca-ac--ctgatcgc
atga-cc--ttgcgtcggcgacaaatc-ttccaagtatctgacctatca-tctgtcgatg
gtgagtgatatgctca-ccatggagatcacgggtaacggggaatcagtgttcgattccgg
agagggag-ccttagaaacggctaccacatctaaggaaggcagcaggcgcgcaaattacc
cactctcagct----agaggaggtagtga-cgaaaaataacgatgcaagactc-atcatg
aggccttgcaattggaatgagtacaa-tttaaatcc-ttt-aacgaggatccattgg-ag
ggcaag-tctggtgccagcagccgcggtaattccagct-ccaatagcgtatattgaagtt
gttgcagttaaaaagctcgtagttggatctgaggtg-gg-------agtca-tcag-ttc
agc-tt-----gcgctg-t---------gactgta-tgt-gctctaccttaca-------
-c---agtcattagacgctctgtggtgctctttactgagtgctg--cg-gagtgcatggc
acgtttactttgaaaaaattaaagtgttcaaagcaggcct--c--agtgcttgtatac-t
ct-tgcatggaataatggaataggacttc---ggt-tct-attttgtt-g-gttttc-gg
a-c------cc-ggagtaa-tgattaaaagagactg-ccgggggcatttgtatggtggcg
ttagaggtga---aattcttggatcgccgccagacaatc-tactgcgaaagcatttgcca
agaatgtcttcattaatcaagaacgaaagtcagaggttcgaagacgatcagataccgt-c
ctagttctgaccataaacgttgccgaccaaca-atcgggggtgg-ttt---gact-ttat
tgaccctcccggctg-t-ccct-gggaaacc-ttaagta---aggttctggggggaatat
ggt-cgcaaggccgaaacttaaaggaattgacggaagggcaccaccaggagtggagcctg
cggcttaatttgactcaacacggggaaactcacccggcccggacactgtaaggatggaca
gat--taaaagctctttcttgattcagtgggtggtggtgcatggccgttcttagttggtg
gagtgatttgtctggttaa--ttccgataacgaacgagactctgacctgc-taaatag--
---tacg--tcggtattgacac----------tcagcaa------------t--gagtgt
tcta-gctggc-gct--gac-ttcttagagggattcg-cagta------ttca-aactgc
acgaaa-tagagcaataacaggtctgtgatgccctta-gatgtccggggccgcac-----
----------------------------------gcgcg-ctacaatgacagcttcagag
agttttg-caacctggtccgaaa-ggattgggaaatctt--ggcatagctgtctcctcag
ggattggggtttgtaactatcccccatgaacgaggaattcccagtaggcgcaagtcatca
gcttgcgccgattacgtccctgccctttgtacacaccgcccgtcgctactaccgattgaa
tggtttagtgaggtcctcggatcgcggtctttgc-a--a-tgg----------caacatt
gc-------ttgg-attgtgag-aaga-ggatcgaac-ttgatcatttagaggaag--t-
aaaagtcgtaacaaggtt-tccgtaggtgaacctgc-ag---------------------
------------------------------------------------------------
------------------------------------------------------------
------------------------------------------------------------
------------------------------------------------------------
------------------------------------------------------------
-----------
>KC529488_Krumbachia_sp_NVS2013
------------------------------------------------------------
--------------cctgccagcagtcat-atgcttgtctcaaagattaag-ccatgcat
gtccaagttcacg-cc-t-ttac-acggcgaaaccgcg-aatggctcattaaatcagcta
ttgtttcttagatctta--cca-tgctacatgg--ataactgcagtaattctg-gagcta
ataca-tgcc--a--a-tatgcttagacttt-a----------ttgtctaggc-gggttt
attag-atca--aaacca-ac-cggc--c-------ttc---------acg-g-gc-tg-
t-ggg------------------tttga-tg-actctggataac-ca-ac--ctgatcgc
atga-cc--ttgcgtcggcgaccattc-ttccaagtatctgacctatca-tctgtcgatg
gtgagtgatatgctca-ccatggagatcacgggtaacggggaatcagtgttcgattccgg
agagggag-ccttagaaacggctaccacatctaaggaaggcagcaggcgcgcaaattacc
cactctcagcg----agaggaggtagtga-cgaaaaataacgatgcaagactc-actatg
aggccttgcaattggaatgagtacaa-tttaaatcc-ttt-aacgaggatccattgg-ag
ggcaag-tctggtgccagcagccgcggtaattccagct-ccaatagcgtatattgaagtt
gttgcagttaaaaagctcgtagttggatctgaggtg-gg-------agtcg-tcag-ttc
agc-tt-----gcgctg-c---------gactgta-cgt-gctctgccttaca-------
-c---agtcattagacgctctgtggtgctctttactgagtgctg--cg-gagtgcatggc
acgtttactttgaaaaaattaaagtgctcaaagcaggcct--c--agtgcttgtatac-t
ct-tgcatggaataatggaataggacttc---ggt-tct-attttgtt-g-gttttc-gg
a-c------cc-ggagtaa-tgattaaaagagactg-ccgggggcatttgtatggtggcg
ttagaggtga---aattcttggatcgccgccagacaatc-tactgcgaaagcatttgcca
agaatgtcttcattaatcaagaacgaaagtcagaggttcgaagacgatcagataccgt-c
ctagttctgaccataaacgttgccgaccaaca-atcgggggtgg-ttt---gact-ttat
tgaccctcctggctg-t-ccct-gggaaacc-ttaagta---aggttctggggggaatat
ggt-cgcaaggccgaaacttaaaggaattgacggaagggcaccaccaggagtggagcctg
cggcttaatttgactcaacacggggaaactcacccggcccggacactgtaaggatggaca
gat--taaaagctctttcttgattcagtgggtggtggtgcatggccgttcttagttggtg
gagtgatttgtctggttaa--ttccgataacgaacgagactctgacctgc-taaatag--
---tacg--tcggtactgacat----------gcagcaa------------t--gcgtgt
tcta-gccggc-gct--gac-ttcttagagggattcg-cagta------ttca-aactgc
acgaaa-tagagcaataacaggtctgtgatgccctta-gatgtccggggccgcac-----
----------------------------------gcgcg-ctacaatgacagcttcagag
agttttg-caacctggtccgaga-ggattgggaaatctt--tgcatagctgtctcctcag
ggattggggtttgtaactatcccccatgaacgaggaattcccagtaggcgcaagtcatca
gcttgcgccgattacgtccctgccctttgtacacaccgcccgtcgctactaccgattgaa
tggtttagtgaggtcctcggatcgcggtctttgc-g----tgg----------caaca-t
gc-------tttg-attgtgag-aaga-cgatcgaac-ttgatcatttagaggaag--t-
aaaagtcgtaacaaggtt-tccgtaggtgaacctgc-ag---------------------
------------------------------------------------------------
------------------------------------------------------------
------------------------------------------------------------
------------------------------------------------------------
------------------------------------------------------------
-----------
>KC529487_Acrochordonoposthia_conica
-----------------------------------------------------------t
tacctg-gtt-gatcctgccagtagtcat-atgcttgtcgcaaagattaag-ccatgcat
gtataagttcacg-cc-t-tcat-acggcgaaaccgcg-aatggctcattaaatcagcta
ttgtttcttagatctta-ctcc-t--tacatgg--ataactgcagtaattctg-gagcta
ataca-tgcc--a--a-tatgcttcaacttc-a----------ccgttgaggc-gggttt
attag-atca--aaacca-ac-cagc--t-------ct-----------cg-g-gc-tg-
t-tgg------------------gttga-tg-aatctggataac-cg-ac--ctgatcgc
atga-cc--ctgcgtcggcgacgtatc-tttcaagtatctgacctatca-actgtcgatg
gtgggtgacatgccca-ccatggtgatcacgggtaacggggaatcagagttcgattccgg
agagggag-ccttagaaacggctaccacatctaaggaaggcagcaggcgcgcaaattacc
cactctcagca----cgaggaggtagtga-cgctacgtaacgatgtgagactg-tttatc
aggcctcacaattggaatgagtacaa-ttcaaatcc-ttt-aacgaggagcaattgg-ag
ggcaag-tctggtgccagcagccgcggtaattccagct-ccaatagcgtatattaaaatt
gttgcagttaaaaagctcgtagttggatctcaggtg-cg-------agtcg-tcgg-tcc
agtctt-----gtgctg-t---------gactgtg-cgt-tctccgccttcat-------
-c---agtcgttagacgctctgtggtgctctttactgggtgcta--cg-gagtgcacggc
acgtttactttgaaaaaattagagtgctcaaagcaggcca--t--tgcgcttgaatag-t
ct-tgcatggaataatggaataggacttc---ggt-tct-attttgtt-g-gttttc-gg
a-c------cc-ggagtaa-tgattaaaagggactg-ccgggggcatttgtatggtggtg
ttagaggtga---aattcttggatcgccgccagacaatc-tactgcgaaagcatttgcca
agaatgtcttcattaatcaagaacgaaagtcagaggttcgaagacgatcagataccgt-c
ctagttctgaccataaacgttgccgaccaaca-atcaggggtgg-ttt---gact-ttat
tgaccctcctggctg-t-ccct-gggaaacc-tacagta---aggttctgggggaagtat
ggt-ctcaaggctgaaacttaaaggaattgacggaagggcaccaccaggagtggagcctg
cggcttaatttgactcaacacggggaaactcacccggcccggacactgtaaggatggaca
gat--taaaagctctttcttgattcagtgggtggtggtgcatggccgttcttagttggtg
gagtgatttgtctggttaa--ttccgataacgaacgagactctgacctgc-taaatag--
---tatg--ctggtatccgtaccttc---------------------------gtggtgc
ttcc-gccagt-acc--gac-ttcttagagggattcg-ctgtc------ttca-aacagc
acgaaa-tagagcaataacaggtctgtgatgccctta-gatgtccggggccgcac-----
----------------------------------gcgcg-ctacaatgacagtatcagag
agtatga-aaacctggtccgaga-ggattgggcaatctt--ggcattaccgtctcctcag
ggattgggatttgtaattatctcccatgaacgaggaattcccagtaggcgcaagtcatca
gcttgcgtcgattacgtccctgccctttgtacacaccgcccgtcgctactaccgattgaa
tgttttagtgaggtcctcggatcgagtcttttgc-g--a-cgg----------caacgtt
gc-------attg-gtcacgag-aaga-cgatcgaac-ttgatcatttagaggaag--t-
aaaagtcgtaacaaggtt-tccgtaggtgaacctgc-aga-tggatcaa-----------
------------------------------------------------------------
------------------------------------------------------------
------------------------------------------------------------
------------------------------------------------------------
------------------------------------------------------------
-----------
>KC529486_Strongylostoma_devleeschouweri
------------------------------------------------------------
tacctg-gtt-gatcctgccagcagtcat-atgcttgtctcaaagattaag-ccatgcat
gtccaagttcacg-cc-t-ttat-acggcgaaaccgcg-aatggctcattaaatcagcta
ttgtttcttagatctta-caaa-tgatacatgg--ataactgcagtaattctg-gagcta
ataca-tgcc--a--attatgcttcggcttc-a----------ttgctgaggc-gggttt
attag-atca--aaatca-ac-cagc--t-------tt-----------cg-g-gc-tga
g-ttt------------------tttgg-tg-actctggataac-ca-ac--ctgatcgc
atga-cc--ttgtgtcggcgacgtatc-tttcaagtatctgacctatca-tctgtcgatg
gtgagtgatatgctca-ccatggagataacgggtaacggggaatcagtgttcgattccgg
agagggag-ccttagaaacggctaccacatctaaggaaggcagcaggcgcgcaaattacc
cactctcagcg----agaggaggtagtga-cgaaaaataacgatgcaagactc-aatatg
aggccttgcaatcggaatgagtacaa-tttaaatcc-ttt-aacgaggatcaattgg-ag
ggcaag-tctggtgccagcagccgcggtaattccagct-ccaatagcgtatattgaaatt
gttgcagttaaaaagctcgtagttggatctgaggtg-gg-------agttg-tcag-ttc
agtgtt-----tcgctg-c---------gactgta-caa-actctaccttaca-------
-c---agtcattagacgctttgcgatgctctttattgagtgttg--ta-gggtgcatggc
acgtttactttgaaaaaattagagtgctcaaagcaggcca--a--agtgcttgtataa-t
ct-tgcatggaataatggaataggacttt---ggt-tct-attttgtt-g-gttttc-gg
a-a------tc-agagtaa-tgattaaaagagactg-ccgggggcatttgtatggtggcg
ttagaggtga---aattcttggatcgccgccagacaatc-tactgcgaaagcatttgcca
agaatgtcttcattaatcaagaacgaaagtcagaggttcgaagacgatcagataccgt-c
ctagttctgaccataaacgttgccgaccaaca-atcaagggtgg-ttt---gact-ttat
tgaccctcttggctg-t-ccct-gggaaacc-ttaagta---aggttctggggggaatat
ggt-cgcaaggccgaaacttaaaggaattgacggaagggcaccaccaggagtggagcctg
cggcttaatttgactcaacacggggaaactcacccggcccggacactgtaaggatggaca
gat--taaaagctctttcttgattcagtgggtggtggtgcatggccgttcttagttggtg
gagtgatttgtctggttaa--ttccgataacgaacgagactctaacctgc-taaatag--
---caca--ctggtattgacatt---------tcacttg------------ttggagtgt
tttc-actggt-gct--ggc-ttcttagagggatttt-cagta------ttta-aactgc
aagaaa-aagagcaataacaggtctgtgatgccctta-gatgtccggggccgcac-----
----------------------------------gcgcg-ctacaatgatagctgcaaaa
agtttga-caacctggtccgaaa-ggatcgggaaatctt--tgaatggttatctcctcag
ggattggggtttgtaattatcccccatgaacgaggaattcccagtaggcgcaagtcatca
gcttgcgccgattacgtccctgccctttgtacacaccgcccgtcgctactaccgattgaa
tggtttagtgaggtcttcggatcgcggtctttgt-g--a-tgg----------taacatt
ac-------tttg-attgtgag-aaga-tgatcgaac-ttgatcatttagaggaag--t-
aaaagtcgtaacaaggtt-tccgtaggtgaacctgc-aga-tggatca------------
------------------------------------------------------------
------------------------------------------------------------
------------------------------------------------------------
------------------------------------------------------------
------------------------------------------------------------
-----------
>KC529485_Strongylostoma_radiatum
------------------------------------------------------------
-------------tcctgccagcagtcat-atgcttgtctcaaagattaag-ccatgcat
gtccaagttcacg-cc-t-taat-acggcgaaaccgcg-aatggctcattaaatcagcta
ttgtttcttagatctta-ccca-tactacatgg--ataactgcagtaattctg-gagcta
ataca-tgcc--a--attatgcttcaccttt-a----------ttggtgaggc-gggttt
attag-atca--aaatca-ac-cagc--t-------tt-----------cg-g-gc-tga
g-ttt------------------tttga-tg-actctggataac-ca-ac--ctgatcgc
atga-cc--ttgtgtcggcgacgtatc-ttccaagtatctgacctatca-tctgtcgatg
gtgagtgatatgctca-ccatggagatcacgggtaacggggaatcagtgttcgattccgg
agagggag-ccttagaaacggctaccacatctaaggaaggcagcaggcgcgcaaattacc
cactctcagcg----agaggaggtagtga-cgaaaaataacgatgcaagactc-aacatg
aggccttgcaatcggaatgagtacaa-tttaaatcc-ttt-aacgaggatcaattgg-ag
ggcaag-tctggtgccagcagccgcggtaattccagct-ccaatagcgtatattgaaatt
gttgcagttaaaaagctcgtagttggatctgaggtg-gg-------agtcg-tcag-ttc
agtgtt-----tcgctg-c---------gactgta-tgt-actctaccttaca-------
-c---agtcattagacgctttgtggtgctctttattgagtgctg--ca-gagtgcatggc
acgtttactttgaaaaaattagagtgctcaaagcaggcca--c--agtgcttgtataa-t
ct-tgcatggaataatggaataggacttc---ggt-tct-attttgtt-g-gttttc-gg
a-a------tc-gaggtaa-tgattaaaagagactg-ccgggggcatttgtatggtggcg
ttagaggtga---aattcttggatcgccgccagacaatc-tactgcgaaagcatttgcca
agaatgtcttcattaatcaagaacgaaagtcagaggttcgaagacgatcagataccgt-c
ctagttctgaccataaacgttgccgaccaaca-atcaagggtgg-ttt---gact-ttat
tgaccctcttggctg-t-ccct-gggaaacc-ttaagta---aggttctggggggaatat
ggt-cgcaaggccgaaacttaaaggaattgacggaaggacaccaccaggagtggagcctg
cggcttaatttgactcaacacggggaaactcacccggcccggacactgtaaggatggaca
gat--taaaagctctttcttgattcagtgggtggtggtgcatggccgttcttagttggtg
gagtgatttgtctggttaa--ttccgataacgaacgagactctaacctgc-taaatag--
---tacg--ttggtattggcatttgc----gattcgtcg------------t--gagtgt
tttc-actgac-gct--gac-ttcttagagggattgg-cagta------ttta-aactgc
aagaaa-aagagcaataacaggtctgtgatgccctta-gatgtccggggccgcac-----
----------------------------------gcgcg-ctacaatgacagatccaaaa
agtttga-aaacctggtccgaaa-ggattgggaaatctt--agaaagtctgtcgcctcag
ggattggggtttgtaactatcccccatgaacgaggaattcccagtaggcgcaagtcatca
gcttgcgccgattacgtccctgtcctttgtacacaccgcccgtcgctactaccgattgaa
tggtttagtgaggtcttcggattgcggtctttgt-g--a-tgg----------taacatt
gc-------ttag-attgtgag-aaga-tgatcgaac-ttgatcatttagaggaag--t-
aaaagtcgtaacaaggtt-tccgtaggtgaacctgc-aga-tggat--------------
------------------------------------------------------------
------------------------------------------------------------
------------------------------------------------------------
------------------------------------------------------------
------------------------------------------------------------
-----------
>KC529484_Typhloplana_viridata
------------------------------------------------------------
tacctg-gtt-gatcctgccagcagtcat-atgcttgtctcaaagattaag-ccatgcat
gtccaagttcacg-cc-t-ttat-acggcgaaaccgcg-aatggctcattaaatcagcta
ttgtttcttagatctta--cca-tactacatgg--ataactgcagtaattctg-gagcta
ataca-tgcc--a--a-tatgccttggcttt-a----------ttgctgaggc-gggttt
attag-atca--aaacca-ac-cggc--c-------ttc---------acg-g-gc-tg-
t-ggg------------------tttga-tg-actctggataac-ca-ac--ctaatcgc
atga-cc--ttgcgtcggcgatgtatc-ttccaagtatctgacctatca-tctgtcgatg
gtgagtgatatgctca-ccatggagataacgggtaacggggaatcagtgttcgattccgg
agagggag-ccttagaaacggctaccacatctaaggaaggcagcaggcgcgcaaattacc
cactctcagcg----agaggaggtagtga-cgaaaaataacgatgcaagactc-attacg
aggccttgcaattggaatgagtacaa-tttaaatcc-ttt-aacgaggatccattgg-ag
ggcaag-tctggtgccagcagccgcggtaattccagct-ccaatagcgtatattgaagtt
gttgcagttaaaaagctcgtagttggatctgaggtg-gg-------attcg-tcag-ttc
agc-tt-----gcgctg-c---------gactgta-cgt-gatctaccttaca-------
-c---agtcattagacgctttgtggtgctctttattgagtgctg--cg-gagtgcatggc
acgtttactttgaaaaaattaaagtgctcaaagcaggcct-----agtgcttgtatac-t
ct-tgcatggaataatggaataggactcc---ggt-tct-attttgtt-g-gttttc-gg
a-c------cc-ggagtaa-tgattaaaagagactg-ccgggggcatttgtatggtggcg
ttagaggtga---aattcttggatcgccgccagacaatc-tactgcgaaagcatttgcca
agaatgtcttcattaatcaagaacgaaagtcagaggttcgaagacgatcagataccgt-c
ctagttctgaccataaacgttgccgaccaaca-atcaggggtgg-ttt---gact-ttat
tgaccctcctggctg-t-ccct-gggaaacc-ttaagta---aggttctggggggaatat
ggt-cgcaaggccgaaacttaaaggaattgacggaagggcaccaccaggagtggagcctg
cggcttaatttgactcaacacggggaaactcacccggcccggacactgtaaggatggaca
gat--taaaagctctttcttgattcagtgggtggtggtgcatggccgttcttagttggtg
gagtgatttgtctggttaa--ttccgataacgaacgagactctgacctgc-taaatag--
---tacg--tcggtattggcat----------tcagcaa------------t--gagtgt
tcta-gccggc-gct--gac-ttcttagagggattcg-cagta------ttta-aactgc
acgaga-tagagcaataacaggtctgtgatgccctta-gatgtccggggccgcac-----
----------------------------------gcgcg-ctacaatgacagcttcagag
agttttg-caacctggtccgaga-ggattgggaaatctt--tgcatggctgtctcctcag
ggattggggtttgtaactgtcccccatgaacgaggaattcccagtaggcgcaagtcatca
gcttgcgccgattacgtccctgccctttgtacacaccgcccgtcgctactaccgattgaa
tggtttagtgaggtcctcggatcgtggtctttgc-g--a-tgg----------caacatt
gc-------tttg-attgtgag-aaga-cgatcgaac-ttgatcatttagaggaag--t-
aaaagtcgtaacaaggtt-tccgtaggtgaacctgc-aga-tggatcaa-----------
------------------------------------------------------------
------------------------------------------------------------
------------------------------------------------------------
------------------------------------------------------------
------------------------------------------------------------
-----------
>KC529483_Thalassoplanella_collaris
------------------------------------------------------------
-cctgg-ttt-gatcctgccagtaattat-atgcttgtctcaaagattaag-ccatgcat
gtactagttcaca-cc-t-taaa-acggtgaaaccgca-aatggctcattaaatcagcta
taatttcttggatctta-aaat--tctacttgg--ataactgtagtaattcta-gagcta
ataca-tgaa--a--c-tatgcctcagctt--------------gctgggtgc-ggattt
attag-aaca--aaacta-ac-tgc---c-------ttc-----------g-ggtt-tg-
g-tt-------------------tttgg-tg-actctggataac-tt-ac--ctgatcgc
atga-cc--ttgtgtcggcgacgtatc-tttcaagtgtctgacctatca-actgacgttg
gtaagttaaatgctta-ccatggttataacgggtaacggggaatcagggttcgactccgg
agagggag-ccttagaaacggctaccacatctaaggaaggcagcaggcgcgcaaattacc
cactctcagct----cgaggaggtagtga-caataaataacaatgcgggactc-ataatg
aggctccgcaattggaatgagtacaa-tttaaatcc-ttt-aacgaggatcaattgg-ag
ggcaag-tctggtgccagcagccgcggtaattccagct-ccaatagcgtatattaaaatt
gttgcagttaaaaagctcgtagttggatctcaggtt-tg-------gtatg-tcgg-tct
ggtcgttg----tacca-t---------gactgtg-cat--atcagcctttat-------
-t---agctgtcagatgctccatggtgttcttaattgaatgctat-gt-gagtgctcggc
acgtttaccttgaaaaaatcagagtgcttaaagcaggcct--t--tgtgcttgtatgt-t
at-tgcatggaataatggaataggacttctgtagt-ctt-attttgtt-g-gtttcc-gg
t-a------tg-gaagtaa-tgaaaaatagagacag-acggggccatttgtatggtggcg
ggagaggtga---aattctgagatcgccgccagacaaac-tactgcgaaagcatttggca
agcatgtcttcattaatcaagaacgaaagtcagaggttcgaagacgatcagataccgt-c
ctagttctgaccataaacgatgccgaccggta-atcaggggtgg-tt----tttttttat
tgaccctcctggttg-c-ccct-gggaaacctcttagtc---aggttctggggggaatat
ggt-ctcaaggccgaaacttaaaggaattgacggaagggcaccaccaggagtggatcctg
cggcttaatttgactcaacacggggaatctcacccggtccggacactaggaggattgaca
gat--tgatagctctttcataattcagtgggtggtggtgcatggccgttcttagttggtg
gagtgatttgtctggttaa--ttccgataacgaacgagactccaacctgc-taaatag--
---ttga--aaagcatcgg--------------ttgctgg-agtcaaa---tccagtggc
taca-gttttt-cct--aac-ttcttagaggaattcg-cggaac-----tata-aaccgc
acgaaa-gagagcaataacaggtctgtgatgccctta-gatgtccggggccgcac-----
----------------------------------gcgcg-atacattgacagtaacaaaa
agtattt-ccacctggtccgaaa-ggattgggaaatctt--tgaattactgtctccacag
ggattggggtttgtaattatcccccatgaacgaggaattcctagtaggcgcaagtcatca
gcttgcgtcgattacgtccctgccctttgtacacaccgcccgtcgctactaccgatcgag
tggattagtgaggacctcggattgacagtttagc-g--g-c------------gcaagcc
gt-------ttta-ttgtcgaa-aagt-ggttcaaac-ttgttcatttagaggaag--t-
aaaagtcgtaacaaggtt-tccgtaggtgaacctgc-aga-tggatcaa-----------
------------------------------------------------------------
------------------------------------------------------------
------------------------------------------------------------
------------------------------------------------------------
------------------------------------------------------------
-----------
>KC529482_Kaitalugia_sp_NVS2013
------------------------------------------------------------
------------------------------------------------------------
----------------------------------cgcg-aatggctcattaaatcagcta
taatttcttagatcttg-aaaa-----acttgg--ataactgtagtaattcta-gagcta
atact-atca--t--t-aatgccttactt--------------cggtaagagc-ggattt
attag-acta--aaacca-a-----------------------------------t-at-
t-tgg------------------tttgg-tgaactctggataac-tt-tt--ctgatcgc
atga-cc--ttgagtcggcgacgtatc-tttcaagtgtctgacctatca-actgtcgttg
gtgagttaatagctca-ccacggttataacgggtaacggggaatcagggttcgattccgg
agagggag-ccttagaaacggctaccacatctaaggaaggcagcaggcgcgcaaattacc
cactctcagtt----cgaggaggtagtga-caataaataacaatgtggaactc-aaaatg
aggctctgcaattggaatgagtacag-actaaatcc-ttt-aacgaggatcaatcag-ag
ggcaag-tctggtgccagcagccgcggtaattccagct-ctgatagcgtatattaatatt
gttgcagttaaaaagctcgtagttggatctcaggtt-ga-------gtgtg-tcgg-ttt
agtcgttg----tacta-t---------aactgtt-cac--gcttgccttta--------
-a---agctgcatgtcggttggtggtgatcttaattgattgctgc-at-aactgctgagc
acgtttaccgtgaaaaaatcagagtgcttaaagcaggcct--t--tgtgcttgaatgg-t
gg-tgcatggaataatgaaataggacttc---ggtcact-attttgtt-g-gtttac-gg
t-g------ct-gaagtaa-tgaaaaatagagacag-acggggtcatttgtatgttggcg
ggagaggtga---aattctgagatcgttgacagacaaac-tactgcgaaagcatttgacc
agcatgtcttcattaatcaagaacgaaagtcagaggatcgaagacgatcagataccgt-c
ctagttctgaccataaacgatgccgaccagtg-atcagaagtgt-gt----tact-taat
tgccgcttctggttg-c-ctct-gggaaacctcatagtt---aggttctggggggaatat
ggt-ctcaaggccgaaacttaaaggaattgacggaggggcaccaccaggagtggagcctg
cggcttaatttgactcaacacggggaatctcacccggtccggacactgggaggattgaca
gat--tgatagctctttcattattcagtgattggtggtgcatggccgttcttagttggtg
gagtgatttgtctggttaa--tttcgataacgaacgagactctaacctgc-taactag--
---ttct--atagcatcg---------------ttgcttcggtgac--tttagctgtaga
tata----------a--aac-ttcttagaggaataca-cggtta-----ctta-agccgt
atgaaa-gagagcaataacaggtctgtgatgccctta-gatgtccggggccgcac-----
----------------------------------gcgcg-ctacattggcagtaacaaaa
agtaata-caacctggttcgaaa-gaattggggaatctt--tgaattactgtctccacag
ggatcggggtttgcaattatcccccgtgaacgaggaattcctagtaggcacaagtcatca
gcttgtgtcgattacgtccctgccccttgtacacaccgcccgtcgctactaccgattgag
tggattagtgaggacttcggattgctttcttttc-g--g-------------tgcaaatc
ga-------ttag-ttagtgaa-aagt-ggttcaaac-ttgttcatttagaggaag--t-
aaaagtcgtaacaaggtt-tccgtaggtgaacct--------------------------
------------------------------------------------------------
------------------------------------------------------------
------------------------------------------------------------
------------------------------------------------------------
------------------------------------------------------------
-----------
>KC529481_Carcharodopharynx_sp_NVS2013
------------------------------------------------------------
---ctg-gtt-gatcctgccagcagtcat-atgcttgtctcaaagattaag-ccatgcat
gtcaaagttcacg-cc-t-ttac-acggcgaaaccgcg-aatggctcattaaatcagcta
ttgtttcttagatctta-ccca-tgttacatgg--ataactgcagtaattctg-gagcta
ataca-tgcc--a--atgatgcctcggcttc-a----------ccgccaaggc-gggttt
attag-atca--aaacca-gc-cggt--c-------ctt---------cgg-g-gc-tgt
c-ggg------------------tttga-tg-actctggataac-cg-ac--ctgatcgc
atga-cc--ttgcgtcggcgatgtatc-ttccaagtatctgacctatca-tctgtcgatg
gtgagtgatatgctca-ccatggagatcacgggtaacggggaatcagtgttcgattccgg
agagggag-ccttagaaacggctaccacatctaaggaaggcagcaggcgcgcaaattacc
cactctcagcg----agaggaggtagtga-cgaaaaataacgatgcaagactc-attatg
aggccttgcaattggaatgagtacaa-tttaaatcc-ttt-aacgaggatccattgg-ag
ggcaag-tctggtgccagcagccgcggtaattccagct-ccaatagcgtatattgaagtt
gttgcagttaaaaagctcgtagttggatctgaggtg-gg-------agtcg-tcgg-tcc
agc-tt-----gcgctg-c---------gactgta-cgt-gctctgccttaca-------
-c---agtcattagacgctctgtggtgctctttactgagtgcta--cg-gagtgcatggc
acgtttactttgaaaaaattaaagtgctcaaagcaggcct--c--agtgcttgtatac-t
ct-tgcatggaataatggaataggacttc---ggt-tct-attttgtt-g-gttttc-gg
a-c------cc-ggagtaa-tgattaaaagggactg-ccgggggcatttgtatggtggcg
ttagaggtga---aattcttggatcgctgccagacgatc-tactgcgaaagcatttgcca
agaatgtcttcattaatcaagaacgaaagtcagaggttcgaagacgatcagataccgt-c
ctagttctgaccataaacgttgtcgacccaca-atcaagggtgg-ttt---g-ct-ttat
tgaccctcttggctg-t-ccct-gggaaacc-ttaagta---aggttctggggggaatat
ggt-cgcaaggccgaaacttaaaggaattgacggaagggcaccaccaggagtggagcctg
cggcttaatttgactcaacacggggaaactcacccggcccggacactgtaaggatggaca
gat--taaaagctctttcttgattcagtgggtggtggtgcatggccgttcttagttggtg
gagtgatttgtctggttaa--ttccgataacgaacgagactctcacctgc-taaatag--
---caca--ccgatatcgactc----------cttc---------------a--tggggt
tcca-gtcggt-gct--ggc-ttcttagagggattcg-cagta------ttca-aactgc
acgaaa-tagagcaataacaggtctgtgatgccctta-gatgtccggggccgcac-----
----------------------------------gcgcg-ctacaatgacagcatcaaaa
agttttg-caacctggttcgaaa-gaattggggaatctt--tgcattgctgtctcctcag
ggattgagatttgtaattatctctcatgaacgaggaattcccagtaggcgcaggtcatca
gcttgcgccgattacgtccctgccctttgtacacaccgcccgtcgctactaccgattgaa
tggtttagtgaggtcctcggattgcggtctttgc-g--a-tgg----------caacatt
gc-------tttg-actgtgag-aaga-cgatcgaac-ttgatcatttagaggaag--t-
aaaagtcgtaacaaggtt-tccgtaggtgaacct--------------------------
------------------------------------------------------------
------------------------------------------------------------
------------------------------------------------------------
------------------------------------------------------------
------------------------------------------------------------
-----------
>KC529480_Gieysztoria_rubra
------------------------------------------------------------
---ctg-gtt-gatcctgccagtagtcat-atgcttgtctcaaagattaag-ccatgcat
gtataagatcacg-cc-c-ttga-atggcgaatctgca-aatggctcattaaatcagcta
ttgtttcttggatctta-caca--tttacttgg--ataactgcagtaattctg-gagcta
ataca-tgcc--a--a-agtgcttcagtcgc-a----------agattggagc-gggttt
attag-atca--aaatca-ac-cagt--t-------tcttcacgga------g-ac-tg-
t-tgg------------------gctga-tg-attctggataac-ca-ac--ctgaccgt
atga-cc--tagcgtcgacggcgtatc-cttcaagtgtctgacctatca-actgtcgatg
gtgagtgatttgctca-ccatggtgatcacgggtaacggggaatcagtgttcgattccgg
agagggag-ccttagaaacggctaccacatctaaggaaggcagcaggcgcgcaaattacc
cactctcaatt----cgaggaggtagtga-cgaaaaataacgatgatagactc-attatg
aggcctatcaattggaatgagtacaa-tttaaatcc-ttt-aacgaggagccattgg-ag
ggcaag-tctggtgccagcagccgcggtaattccagct-ccaatagcgtatattaaattt
gttgcagttaaaaagctcgtagttggatctcaggtg-tg-------agtcg-gcgg-tac
agtctttttg--tattg-t---------aactgtt-cgt-gctccgccttca--att---
-g---agctgtt-gatgctttgtagtggtcttcattgactgttg--ca-gagtgcacagc
acgtttactttgaaaaaattagagtgctcaaagcaggccg-ct--tgtgcctgaatag-t
ct-tgcatggaataatggaagaggacttc---ggt-tct-attttgtt-g-gttttc-gg
t-t------cc-gaagtaa-tgattaaaagagacag-acgtgggcatttgtatggtggtg
ttagaggtga---aattcttggatcgccgccagacaaac-tacagcgaaagcatttgcca
aggatgccttcattaatcaagaacgaaagtcagaggttcgaagacgatcagataccgt-c
ctagttctgaccataaactttaccgactaaca-atcaggggcgg-tta---gaat-ttat
tgaccctcctggctg-t-ccct-gggaaacc-tgaagtat--aggttctggggggaatat
ggt-cacaaggctgaaacttaaaggaattgacggaagggcaccaccaggagtggagcctg
cggcttaatttgactcaacacggggaaactcacccggcccggacactggaaggatggaca
gattgtgacagctctttcttgatt--gaggggggtggtgcatggccgttctctgtgtttg
gagtgatttgtctggggaaatttccgataacgaacgagactctgtcctgc-taaatag--
---tacg--ctgatcctggact---------acccgtca-------------aacggtgt
ctca-gtcagt-gct--gac-ttcttagagggatacg-cggta------ctca-aaccgc
acgaaa-tagagcaataacaggtctgtgatgccctta-gatgtccggggccgcac-----
----------------------------------gcgcg-ctacaatgacagtatcagag
agtatta-acacctgatccgaga-ggattgggaaatctt--tgcattattgtcacatcag
ggattgagacttgtaattatttctcatgaacgaggaattcccagtagatgcaagtcatca
gcttgcgtcgattacgtccctgccctttgtacacaccgcccgtcgctactaccgattgaa
tggtttagtgaggtcctcggatcgtgacctctgc------agt----------gcaagct
gc-------attg-gttgtgag-aaga-cgatcgaac-ttgatcatttagaggaag--t-
aaaagtcgtaacaaggtt-tccgtaggtgaacctgc-aga-tgga---------------
------------------------------------------------------------
------------------------------------------------------------
------------------------------------------------------------
------------------------------------------------------------
------------------------------------------------------------
-----------
>KC529479_Gieysztoria_dodgei
----------------------------------------------------------ct
tacctg-gtt-gatcctgccagtagtcat-atgcttgtctcaaagattaag-ccatgcat
gtataagatcacg-cc-c-tcgg-atggcgaatctgca-aatggctcattaaatcagcta
ttgtttcttggatctta-cactactttacttgg--ataactgcagtaattctg-gagcta
ataca-tgcc--a--a-agtgcttcagtcgc-a----------agattggagc-gggttt
attag-atca--aaatca-ac-cagt--c-------tacccgtaaaaaggt-g-gc-tg-
t-tgg------------------gctga-tg-attctggataac-ca-ac--ctgaccgt
atga-cc--ttgtgtcgacggcgtatc-cttcaagtgtctgacctatca-actgtcgatg
gtgagtgatttgctca-ccatggtgatcacgggtaacggggaatcagtgttcgattccgg
agagggag-ccttagaaacggctaccacatctaaggaaggcagcaggcgcgcaaattacc
cactctcaatt----cgaggaggtagtga-cgaaaaataacgatgatagactc-attatg
aggcctatcaattggaatgagtacaa-tttaaatcc-ttt-aacgaggagccattgg-ag
ggcaag-tctggtgccagcagccgcggtaattccagct-ccaatagcgtatattaaattt
gttgcagttaaaaagctcgtagttggatctcaggtg-tg-------agtcg-gcgg-tac
agtctattcaatggctg-t---------aactgtt-cgcatctccaccttca--atcata
-c---agctgtt-gatgctttgcagtggtcttcattgactgttg--ta-gagtgcacagc
acgtttactttgaaaaaattagagtgctcaaagcaggccg-tt--tgtgcttgaatag-t
ct-tgcatggaataatggaagaggacttc---ggt-tct-attttgtt-g-gttttc-gg
t-t------cc-gaagtaa-tgattaaaagagacag-acgtgggcatttgtatggtggtg
ttagaggtga---aattcttggatcgccgccagacaaac-tacagcgaaagcatttgcca
aggatgccttcattaatcaagaacgaaagtcagaggttcgaagacgatcagataccgt-c
ctagttctgaccataaactttaccgactaaca-atcaggggtgg-tta---gattattat
tgaccctcctggctg-t-ccct-gggaaacc-tgaagtat--aggttctggggggaatat
ggt-cacaaggctgaaacttaaaggaattgacggaagggcaccaccaggagtggagcctg
cggcttaatttgactcaacacggggaaactcacccggcccggacactggaaggatggaca
gat--tgacagctctttcttgattcagtgggtggtggtgcatggccgttcttagttggtg
gagtgatttgtctggttaa--ttccgataacgaacgagactctgtcctgc-taaatag--
---taca--ctgatcctgggct-----------atgtca-------------aaa-tagt
ctca-gtcagt-gct--gac-ttcttagagggatacg-cggta------ttta-aaccgc
acgaaa-tagagcaataacaggtctgtgatgccctta-gatgtccggggccgcac-----
----------------------------------gcgcg-ctacaatgacagtatcagag
agtatta-ccacctggcccgagacgggctgggaaatctt--tgaattattgtcacatcag
ggattgagacttgtaattatttctcatgaacgaggaattcccagtagatgcaagtcatca
gcttgcgtcgattacgtccctgccctttgtacacaccgcccgtcgctactaccgattgaa
tggtttagtgaggtcctcggatcgtgacctctgc------agt----------gaaagct
gc-------attg-gttgtgag-aaga-cgatcgaac-ttgatcatttagaggaag--t-
aaaagtcgtaacaaggtt-tccgtaggtgaacctgc-aga-tggat--------------
------------------------------------------------------------
------------------------------------------------------------
------------------------------------------------------------
------------------------------------------------------------
------------------------------------------------------------
-----------
>KC529478_Gieysztoria_triquetra
------------------------------------------------------------
--------------cctgccagtagtcat-atgcttgtctcaaagattaag-ccatgcat
gtataagatcacg-cc-c-tcgg-atggcgaatctgca-aatggctcattaaatcagcta
ttgtttcttggatctta-caccac-ttacttgg--ataactgcagtaattctg-gagcta
ataca-tgcc--a--a-agtgcttcagtcgc-a----------agattggagc-gggttt
attag-atca--aaatca-ac-cagt--c-------tacccgtaaaaaggt-g-gc-tg-
t-tgg------------------gctga-tg-attctggataac-ca-ac--ctgaccgt
atga-cc--ttgtgtcgacggcgtatc-cttcaagtgtctgacctatca-actgtcgatg
gtgagtgatttgctca-ccatggtgatcacgggtaacggggaatcagtgttcgattccgg
agagggag-ccttagaaacggctaccacatctaaggaaggcagcaggcgcgcaaattacc
cactctcaatt----cgaggaggtagtga-cgaaaaataacgatgatagactc-attatg
aggcctatcaattggaatgagtacaa-tttaaatcc-ttt-aacgaggagccattgg-ag
ggcaag-tctggtgccagcagccgcggtaattccagct-ccaatagcgtatattaaattt
gttgcagttaaaaagctcgtagttggatctcaggtg-tg-------agtcg-gcgg-tat
agtctattcaatggctg-t---------aactgtt-cgcatctccaccttca--atcata
tt---agctgtt-gatgctttgcagtggtcttcattgactgttg--ta-gagtgcacagc
acgtttactttgaaaaaattagagtgctcaaagcaggccg-tt--tgtgcttgaatag-t
ct-tgcatggaataatggaagaggacttc---ggt-tct-attttgtt-g-gttttc-gg
t-t------cc-gaagtaa-tgattaaaagagacag-acgtgggcatttgtatggtggtg
ttagaggtga---aattcttggatcgccgccagacaaac-tacagcgaaagcatttgcca
aggatgccttcattaatcaagaacgaaagtcagaggttcgaagacgatcagataccgt-c
ctagttctgaccataaactttaccgactaaca-atcaggggtgg-tta---gattattat
tgaccctcctggctg-t-ccct-gggaaacc-tgaagtat--aggttctggggggaatat
ggt-cacaaggctgaaacttaaaggaattgacggaagggcaccaccaggagtggagcctg
cggcttaatttgactcaacacggggaaactcacccggcccggacactggaaggatggaca
gat--tgacagctctttcttgattcagtgggtggtggtgcatggccgttcttagttggtg
gagtgatttgtctggttaa--ttccgataacgaacgagactctgtcctgc-taaatag--
---tacg--ctgatcctggact---------tggtgtca-------------aaaccagt
ctca-gtcagt-gct--gac-ttcttagagggatacg-cggta------ttca-aaccgc
acgaaa-tagagcaataacaggtctgtgatgccctta-gatgtccggggccgcac-----
----------------------------------gcgcg-ctacaatgacagtatcagag
agtatta-ccacctggcccgagacgggctgggaaatctt--tgaattattgtcacatcag
ggattgagacttgtaattatttctcatgaacgaggaattcccagtagatgcaagtcatca
gcttgcgtcgattacgtccctgccctttgtacacaccgcccgtcgctactaccgattgaa
tggtttagtgaggtcctcggatcgtgacctctgc------agt----------gcaagct
gc-------attg-gttgtgag-aaga-cgatcgaac-ttgatcatttagaggaag--t-
aaaagtcgtaacaaggtt-tccgtaggtgaacctgc------------------------
------------------------------------------------------------
------------------------------------------------------------
------------------------------------------------------------
------------------------------------------------------------
------------------------------------------------------------
-----------
>KC529477_Gieysztoria_sp7_hooklet
------------------------------------------------------------
--------------cctgccagtagtcat-atgcttgtctcaaagattaag-ccatgcat
gtataagatcacg-ta-t-tcgc-attacgaatctgca-aatggctcattaaatcagcta
ttgtttcttggatctta-cact--tttacttgg--ataactgcagtaattctg-gagcta
ataca-tgcc--a--a-tgtgcttcagtcgc-a----------agattggagc-gggttt
attag-atca--aaatca-ac-cagt--c-------tcttcacgga------g-ac-tg-
t-tgg------------------gctga-tg-attctggataac-ca-ac--ctgaccgt
acga-cc--ttgtgttgacggcgtatc-cttcaagtgtctgacctatca-actgtcgatg
gtgagtgatttgctca-ccatggtgataacgggtaacggggaatcagtgttcgattccgg
agagggag-ccttagaaacggctaccacatctaaggaaggcagcaggcgcgcaaattacc
cactctcaatt----cgaggaggtagtga-cgaaaaataacgatgatagactc-attatg
aggcctatcaattggaatgagtacaa-tttaaatcc-ttt-aacgaggagccattgg-ag
ggcaag-tctggtgccagcagccgcggtaattccagct-ccaatagcgtatattaaattt
gttgcagttaaaaagctcgtagttggatctcaggtg-tg-------agtcg-gcgg-tac
agtctttttg--tattg-t---------aactgtt-cgt-tctccaccttca--att---
-g---agctgtt-gatgctctgtagtggtcttcattgactgtta--ta-gagtgcacagc
acgtttactttgaaaaaattagagtgctcaaagcaggccg-ct--tgtgcttgaatag-t
ct-tgcatggaataatggaagaggacttc---ggt-tct-attttgtt-g-gttttc-gg
t-t------cc-gaagtaa-tgattaaaagagacag-acgtgggcatttgtatggtggtg
ttagaggtga---aattcttggatcgccgccagacaaac-cacagcgaaagcatttgcca
aggatgccttcattaatcaagaacgaaagtcagaggttcgaagacgatcagataccgt-c
ctagttctgaccataaactttaccgactaaca-atcagtggcgg-tta---gaat-ttat
tgaccctactggctg-t-ccct-gggaaacc-tgaagtat--aggttctggggggaatat
ggt-cacaaggctgaaacttaaaggaattgacggaagggcaccaccaggagtggagcctg
cggcttaatttgactcaacacggggaaactcacccggcccggacactggaaggatggaca
gat--tgacagctctttcttgattcagtgggtggtggtgcatggccgttcttagttggtg
gagtgatttgtctggttaa--ttccgataacgaacgagactctgtcctgc-taaatag--
---taca--ctgatcctggact---------accttcg----------------tggtgt
ctta-gtcagt-gct--gac-ttcttagagggatacg-cggta------ctca-aaccgc
acgaaa-tagagcaataacaggtctgtgatgccctta-gatgtccggggccgcac-----
----------------------------------gcgcg-ctacaatgacagtatcagag
agtatta-ccacctggtccgaaa-ggattgggaaatctt--ggcattattgtcacatcag
ggattgagacttgtaattatttctcatgaacgaggaattcccagtagatgcaagtcatca
gcttgcgtcgattacgtccctgccctttgtacacaccgcccgtcgctactaccgattgaa
tggtttagtgaggtcctcggattgtgacctctgc------agt----------gcaagct
gc-------attg-gttgtgag-aaga-cgatcgaac-ttgatcatttagaggaag--t-
aaaagtcgtaacaaggtt-tccgtaggtgaacctgc-ag---------------------
------------------------------------------------------------
------------------------------------------------------------
------------------------------------------------------------
------------------------------------------------------------
------------------------------------------------------------
-----------
>KC529476_Gieysztoria_choctaw
------------------------------------------------------------
---------------ctgccagtagtcat-atgcttgtctcaaagattaag-ccatgcat
gtataagatcaca-cc-c-tcgg-atggtgaatctgca-aatggctcattaaatcagcta
ttgtttcttggatctta-cact--ctcacttgg--ataactgcagtaattctg-gagcta
ataca-tgcc--a--a-agtgcttcagtcgc-a----------agattggagc-gggttt
attag-atca--aaatca-ac-cagt--c-------tcttcacgga------g-ac-tg-
t-tgg------------------gctga-tg-attctggataac-ca-ac--ctgaccgt
atga-cc--ttgtgtcgacggcgtatc-cttcaagtgtctgacctatca-actgtcgatg
gtgagtgatttgctca-ccatggtgatcacgggtaacggggaatcagtgttcgattccgg
agagggag-ccttagaaacggctaccacatctaaggaaggcagcaggcgcgcaaattacc
cactctcaatt----cgaggaggtagtga-cgaaaaataacgatgatagactc-atcatg
aggcctatcaattggaatgagtacaa-tttaaatcc-ttt-aacgaggagccattgg-ag
ggcaag-tctggtgccagcagccgcggtaattccagct-ccaatagcgtatattaaattt
gttgcagttaaaaagctcgtagttggatctcaggtg-tg-------agtcg-gcgg-tac
agtctttttg--tattg-t---------aactgtt-cgt-tctccaccttta--att---
-g---agctgtt-gatgctctgtagtggtcttcattgactgttg--ca-gagtgcacagc
acgtttactttgaaaaaattagagtgctcaaagcaggccg-ct--tgtgcttgaatag-t
ct-tgcatggaataatggaagaggacttc---ggt-tct-attttgtt-g-gttttc-gg
t-t------cc-gaagtaa-tgattaaaagagacag-acgtgggcatttgtatggtggtg
ttagaggtga---aattcttggatcgccgccagacaaac-tacagcgaaagcatttgcca
aggatgccttcattaatcaagaacgaaagtcagaggttcgaagacgatcagataccgt-c
ctagttctgaccataaactttaccgactaaca-atcaggggcgg-tta---gaat-ttat
tgaccctcctggctg-t-ccct-gggaaacc-tgaagtat--aggttctggggggaatat
ggt-cacaaggctgaaacttaaaggaattgacggaagggcaccaccaggagtggagcctg
cggcttaatttgactcaacacggggaaactcacccggcccggacactggaaggatggaca
gat--tgacagctctttcttgattcagtgggtggtggtgcatggccgttcttagttggtg
gagtgatttgtctggttaa--ttccgataacgaacgagactctgtcctgc-taaatag--
---taca--ttgatcctggaat---------acccgtca-------------aacggttt
ctca-gtcaat-gct--gac-ttcttagagggatacg-cggta------ttca-aaccgc
acgaaa-tagagcaataacaggtctgtgatgccctta-gatgtccggggccgcac-----
----------------------------------gcgcg-ctacaatgacagtatcagag
agtatta-ccacctgatccgaaa-ggattgggaaatctt--tgcattattgtcacatcag
ggattgagacttgtaattatttctcatgaacgaggaattcccagtagatgcaagtcatca
gcttgcgtcgattacgtccctgccctttgtacacaccgcccgtcgctactaccgattgaa
tggtttagtgaggtcctcggattgtgacctctgc------agt----------gaaagct
gc-------attg-gttctgag-aaga-cgatcgaac-ttgatcatttagaggaag--t-
aaaagtcgtaacaaggtt-tccgtaggtgaacctgc-a----------------------
------------------------------------------------------------
------------------------------------------------------------
------------------------------------------------------------
------------------------------------------------------------
------------------------------------------------------------
-----------
>KC529475_Gieysztoria_beltrani
------------------------------------------------------------
tacctg-gtt-gatcctgccagtagtcat-atgcttgtctcaaagattaag-ccatgcat
gtataagatcacaccc-t-ttgt-tcggtgaatctgca-aatggctcattaaatcagcta
ttgtttcttggatctta-cact--cttacttgg--ataactgcagtaattctg-gagcta
ataca-tgcc--a--a-agtgcttcagtcgc-a----------agattggagc-gggttt
attag-atca--aaatca-ac-cagt--t-------tcttcacgga------g-ac-tg-
t-tgg------------------gctga-tg-attctggataac-ca-ac--ctgaccgt
atga-cc--cagtgtcgacggcgtatc-cttcaagtgtctgacctatca-actgtcgatg
gtgagtgatttgctca-ccatggtgatcacgggtaacggggaatcagtgttcgattccgg
agagggag-ccttagaaacggctaccacatctaaggaaggcagcaggcgcgcaaattacc
cactctcaatt----cgaggaggtagtga-cgaaaaataacgatgatagactc-attatg
aggcctatcaattggaatgagtacaa-tttaaatcc-ttt-aacgaggagccattgg-ag
ggcaag-tctggtgccagcagccgcggtaattccagct-ccaatagcgtatattaaattt
gttgcagttaaaaagctcgtagttggatctcaggtg-tg-------agtcg-gcgg-tac
agtctttttg--tactg-t---------aactgtt-cgt-tctccaccttca--att---
-g---agctgtt-gatgctctgtagtggtcttcattgactgttg--ca-gagtgcacagc
acgtttactttgaaaaaattagagtgctcaaagcaggccg-ct--tgtgcttgaatag-t
ct-tgcatggaataatggaagaggacttc---ggt-tct-attttgtt-g-gttttc-gg
t-t------cc-gaagtaa-tgattaaaagagacag-acgtgggcatttgtatggtggtg
ttagaggtga---aattcttggatcgccgccagacaaac-tacagcgaaagcatttgcca
aggatgccttcattaatcaagaacgaaagtcagaggttcgaagacgatcagataccgt-c
ctagttctgaccataaactttaccgactaaca-atcaggggcgg-tta---gaat-ctat
tgaccctcctggctg-t-ccct-gggaaacc-tgaagtat--aggttctggggggaatat
ggt-cacaaggctgaaacttaaaggaattgacggaagggcaccaccaggagtggagcctg
cggcttaatttgactcaacacggggaaactcacccggcccggacactggaaggatggaca
gat--tgacagctctttcttgattcagtgggtggtggtgcatggccgttcttagttggtg
gagtgatttgtctggttaa--ttccgataacgaacgagactctgtcctgc-taaatag--
---taca--ctgatcttgga-t---------accctcg----------------tggtgt
ctca-gtcagt-gct--gac-ttcttagagggatacg-cggta------ttca-aaccgc
acgaaa-tagagcaataacaggtctgtgatgccctta-gatgtccggggccgcac-----
----------------------------------gcgcg-ctacaatgacagtatcagag
agtatta-ccacctggtccgaaa-ggattgggaaatctt--ggcattattgtcacatcag
ggattgagacttgtaattatttctcatgaacgaggaattcccagtagatgcaagtcatca
gcttgcgtcgattacgtccctgccctttgtacacaccgcccgtcgctactaccgattgaa
tggtttagtgaggtcctcggatcgtgacctttgc------agt----------gcaagct
gc-------attg-gttgtgag-aaga-cgatcgaac-ttgatcatttagaggaag--t-
aaaagtcgtaacaaggtt-tccgtaggtgaacctgc-aga--------------------
------------------------------------------------------------
------------------------------------------------------------
------------------------------------------------------------
------------------------------------------------------------
------------------------------------------------------------
-----------
>KC529474_Gieysztoria_sp6_brown
------------------------------------------------------------
---------------ctgccagtagtcat-atgcttgtctcaaagattaag-ccatgcat
gtattaggtcacaccc-t-tagt-tcggtgaacctgca-aatggctcattaaatcagcta
ttgtttcttggatctta-cact--tttacttgg--ataactgcagtaattctg-gagcta
ataca-tgcc--a--a-agtgcttcagtcgc-a----------agattggagc-gggttt
attag-atca--aaatca-ac-cagt--c-------ttct--cgga------g-ac-tg-
t-tgg------------------gctga-tg-attctggataac-ca-ac--ctgaccgt
acga-cc--ttgtgtcgacggtgtatc-cttcaagtgtctgacctatca-actgtcgatg
gtgagtgatttgctca-ccatggtgatcacgggtaacggggaatcagtgttcgattccgg
agagggag-ccttagaaacggctaccacatctaaggaaggcagcaggcgcgcaaattacc
cactctcaatt----cgaggaggtagtga-cgaaaaataacgatgatagactc-attatg
aggcctatcaattggaatgagtacaa-tttaaatcc-ttt-aacgaggagccattgg-ag
ggcaag-tctggtgccagcagccgcggtaattccagct-ccaatagcgtatattaaattt
gttgcagttaaaaagctcgtagttggatctcaggtg-tg-------agtcg-gcgg-tac
agtctttttg--tattg-t---------aactgtt-cgt-tctccaccttca--att---
-g---agctgtt-gatgctctgtagtggtctttactgattgttg--ca-gagtgcacagc
acgtttactttgaaaaaattagagtgctcaaagcaggccg--t--tgtgcttgaatag-t
ct-tgcatggaataatggaagaggacttc---ggt-tct-attttgtt-g-gttttc-gg
t-t------cc-gaagtaa-tgattaaaagagacag-acgtgggcatttgtatggtggtg
ttagaggtga---aattcttggatcgccgccagacaaac-cacagcgaaagcatttgcca
aggatgccttcattaatcaagaacgaaagtcagaggttcgaagacgatcagataccgt-c
ctagttctgaccataaactttaccgactaaca-atcaagggcgg-tta---gaat-ttat
tgaccctcttggctg-t-ccct-gggaaacc-tgaagtat--aggttctggggggaatat
ggt-cacaaggctgaaacttaaaggaattgacggaagggcaccaccaggagtggagcctg
cggcttaatttgactcaacacggggaaactcacccggcccggacactggaaggatggaca
gat--tgacagctctttcttgattcagtgggtggtggtgcatggccgttcttagttggtg
gagtgatttgtctggttaa--ttccgataacgaacgagactctgtcctgc-taaatag--
---taca--ctgatcttggact---------acctttac---------------tggtgt
ctca-gtcagt-gct--gac-ttcttagagggatacg-cggta------ctca-aaccgc
acgaaa-tagagcaataacaggtctgtgatgccctta-gatgtccggggccgcac-----
----------------------------------gcgcg-ctacaatgacagtatcagag
agtatta-acacctggtccgaaa-ggattgggaaatctt--ggcattattgtcacatcag
ggattgagacttgtaattatttctcatgaacgaggaattcccagtagatgcaagtcatca
gcttgcgtcgattacgtccctgccctttgtacacaccgcccgtcgctactaccgattgaa
tggtttagtgaggtcctcggattgtgacctctgc------agt----------gaaagct
gc-------attg-gttatgag-aaga-cgatcgaac-ttgatcatttagaggaag--t-
aaaagtcgtaacaaggtt-tccgtaggtgaacctgc-aga-tggatcaa-----------
------------------------------------------------------------
------------------------------------------------------------
------------------------------------------------------------
------------------------------------------------------------
------------------------------------------------------------
-----------
>KC529473_Gieysztoria_complicata
------------------------------------------------------------
-------------tcctgccagtagtcat-atgcttgtctcaaagattaag-ccatgcat
gtattaggtcacaccc-t-ttgt-tcggtgaacctgca-aatggctcattaaatcagcta
ttgtttcttggatctta-cact--tttacttgg--ataactgcagtaattctg-gagcta
ataca-tgcc--a--a-agtgcttcagtcgc-a----------agattggagc-gggttt
attag-atca--aaatca-ac-cagt--c-------ttct--cgga------g-ac-tg-
t-tgg------------------gctga-tg-attctggataac-ca-ac--ctgaccgt
atga-cc--ttgtgtcgacggtgtatc-cttcaagtgtctgacctatca-actgtcgatg
gtgagtgatttgctca-ccatggtgatcacgggtaacggggaatcagtgttcgattccgg
agagggag-ccttagaaacggctaccacatctaaggaaggcagcaggcgcgcaaattacc
cactctcaatt----cgaggaggtagtga-cgaaaaataacgatgatagactc-attatg
aggcctatcaattggaatgagtacaa-tttaaatcc-ttt-aacgaggagccattgg-ag
ggcaag-tctggtgccagcagccgcggtaattccagct-ccaatagcgtatattaaattt
gttgcagttaaaaagctcgtagttggatctcaggtg-tg-------agtcg-gcgg-tac
agtctttttg--tattg-t---------aactgtt-cgt-tctccaccttca--att---
-g---agctgtt-gatgctctgtagtggtctttactgattgttg--ca-gagtgcacagc
acgtttactttgaaaaaattagagtgctcaaagcaggccg--t--tgtgcttgaatag-t
ct-tgcatggaataatggaagaggacttc---ggt-tct-attttgtt-g-gttttc-gg
t-t------cc-gaagtaa-tgattaaaagagacag-acgtgggcatttgtatggtggtg
ttagaggtga---aattcttggatcgccgccagacaaac-cacagcgaaagcatttgcca
aggatgccttcattaatcaagaacgaaagtcagaggttcgaagacgatcagataccgt-c
ctagttctgaccataaactttaccgactaaca-atcaagggcgg-tta---gaat-ttat
tgaccctcttggctg-t-ccct-gggaaacc-tgaagtat--aggttctggggggaatat
ggt-cacaaggctgaaacttaaaggaattgacggaagggcaccaccaggagtggagcctg
cggcttaatttgactcaacacggggaaactcacccggcccggacactggaaggatggaca
gat--tgacagctctttcttgattcagtgggtggtggtgcatggccgttcttagttggtg
gagtgatttgtctggttaa--ttccgataacgaacgagactctgtcctgc-taaatag--
---taca--ctgatcttggact---------acctttac---------------tggtgt
ctca-gtcagt-gct--gac-ttcttagagggatacg-cggta------ctca-aaccgc
acgaaa-tagagcaataacaggtctgtgatgccctta-gatgtccggggccgcac-----
----------------------------------gcgcg-ctacaatgacagtatcagag
agtatta-acacctggtccgaaa-ggattgggaaatctt--ggcattattgtcacatcag
ggattgagacttgtaattatttctcatgaacgaggaattcccagtagatgcaagtcatca
gcttgcgtcgattacgtccctgccctttgtacacaccgcccgtcgctactaccgattgaa
tggtttagtgaggtcctcggattgtgacctctgc------agt----------gaaagct
gc-------attg-gttatgag-aaga-cgatcgaac-ttgatcatttagaggaag--t-
aaaagtcgtaacaaggtt-tccgtaggtgaacctgc-aga-tggat--------------
------------------------------------------------------------
------------------------------------------------------------
------------------------------------------------------------
------------------------------------------------------------
------------------------------------------------------------
-----------
>KC529472_Gieysztoria_pavimentata
------------------------------------------------------------
-------------tcctgccagtagtcat-atgcttgtctcaaagattaag-ccatgcat
gtataaggtcacaccc-t-ttgt-taggtgaacctgca-gatggatcattaaatcagcta
ttgtttcttggatctta-cact--tttacttgg--ataactgcagtaattctg-gagcta
ataca-tgcc--a--a-agtgcttcaatcgc-a----------agattggagc-gggttt
attag-atca--aaatca-ac-cagt--c-------tctt--cggg------g-ac-tg-
t-tgg------------------gctga-tg-attctggataac-ca-ac--ctgaccgt
acga-cc--ttgtgtcgacggtgtatc-cttcaagtgtctgacctatca-actgtcgatg
gtgagtgatttgctca-ccatggtgatcacgggtaacggggaatcagtgttcgattccgg
agagggag-ccttagaaacggctaccacatctaaggaaggcagcaggcgcgcaaattacc
cactctcaatt----cgaggaggtagtga-cgaaaaataacgatgatagactc-attatg
aggcctatcaattggaatgagtacaa-tttaaatcc-ttt-aacgaggagccattgg-ag
ggcaag-tctggtgccagcagccgcggtaattccagct-ccaatagcgtatattaaattt
gttgcagttaaaaagctcgtagttggatctcaggtg-tg-------agtcg-gcgg-tac
agtctttttg--tattg-t---------aactgtt-cgt-tctccaccttca--att---
-g---agctgtt-gatgctctgtagtggtctttactgattgttg--ca-gagtgcacagc
acgtttactttgaaaaaattagagtgctcaaagcaggccg--t--tgtgcttgaatag-t
ct-tgcatggaataatggaagaggacttc---ggt-tct-attttgtt-g-gttttc-gg
t-t------cc-gaagtaa-tgattaaaagagacag-acgtgggcatttgtatggtggtg
ttagaggtga---aattcttggatcgccgccagacaaac-cacagcgaaagcatttgcca
aggatgccttcattaatcaagaacgaaagtcagaggttcgaagacgatcagataccgt-c
ctagttctgaccataaactttaccgactaaca-atcaagggcgg-tta---gaat-ttat
tgaccctcttggctg-t-ccct-gggaaacc-tgaagtat--aggttctggggggaatat
ggt-cacaaggctgaaacttaaaggaattgacggaagggcaccaccaggagtggagcctg
cggcttaatttgactcaacacggggaaactcacccggcccggacactggaaggatggaca
gat--tgacagctctttcttgattcagtgggtggtggtgcatggccgttcttagttggtg
gagtgatttgtctggttaa--ttccgataacgaacgagactctgtcctgc-taaatag--
---taca--ctgatcttggatt---------accttca----------------tggtgt
ctca-gtcagt-gct--gac-ttcttagagggatacg-cggta------ctca-aaccgc
acgaaa-tagagcaataacaggtctgtgatgccctta-gatgtccggggccgcac-----
----------------------------------gcgcg-ctacaatgacagtatcagag
agtatta-acacctggtccgaaa-ggattgggaaatctt--ggcattattgtcacatcag
ggattgagacttgtaattatttctcatgaacgaggaattcccagtagatgcaagtcatca
gcttgcgtcgattacgtccctgccctttgtacacaccgcccgtcgctactaccgattgaa
tggtttagtgaggtcctcggattgtgacctctgc------agt----------gaaagct
gc-------attg-gttatgag-aaga-cgatcgaac-ttgatcatttagaggaag--t-
aaaagtcgtaacaaggtt-tccgtaggtgaacctgc-ag---------------------
------------------------------------------------------------
------------------------------------------------------------
------------------------------------------------------------
------------------------------------------------------------
------------------------------------------------------------
-----------
>KC529471_Gieysztoria_pavimentata
------------------------------------------------------------
------------------ccagtagtcat-atgcttgtctcaaagattaag-ccatgcat
gtataaggtcacaccc-t-ttgt-tcggtgaacctgca-aatggctcattaaatcagcta
ttgtttcttggatctta-cact--tttacttgg--ataactgcagtaattctg-gagcta
ataca-tgcc--a--a-agtgcttcaatcgc-a----------agattggagc-gggttt
attag-atca--aaatca-ac-cagt--c-------tctt--cggg------g-ac-tg-
t-tgg------------------gctga-tg-attctggataac-ca-ac--ctgaccgt
acga-cc--ttgtgtcgacggtgtatc-cttcaagtgtctgacctatca-actgtcgatg
gtgagtgatttgctca-ccatggtgatcacgggtaacggggaatcagtgttcgattccgg
agagggag-ccttagaaacggctaccacatctaaggaaggcagcaggcgcgcaaattacc
cactctcaatt----cgaggaggtagtga-cgaaaaataacgatgatagactc-attatg
aggcctatcaattggaatgagtacaa-tttaaatcc-ttt-aacgaggagccattgg-ag
ggcaag-tctggtgccagcagccgcggtaattccagct-ccaatagcgtatattaaattt
gttgcagttaaaaagctcgtagttggatctcaggtg-tg-------agtcg-gcgg-tac
agtctttttg--tattg-t---------aactgtt-cgt-tctccaccttca--att---
-g---agctgtt-gatgctctgtagtggtctttactgattgttg--ca-gagtgcacagc
acgtttactttgaaaaaattagagtgctcaaagcaggccg--t--tgtgcttgaatag-t
ct-tgcatggaataatggaagaggacttc---ggt-tct-attttgtt-g-gttttc-gg
t-t------cc-gaagtaa-tgattaaaagagacag-acgtgggcatttgtatggtggtg
ttagaggtga---aattcttggatcgccgccagacaaac-cacagcgaaagcatttgcca
aggatgccttcattaatcaagaacgaaagtcagaggttcgaagacgatcagataccgt-c
ctagttctgaccataaactttaccgactaaca-atcaagggcgg-tta---gaat-ttat
tgaccctcttggctg-t-ccct-gggaaacc-tgaagtat--aggttctggggggaatat
ggt-cacaaggctgaaacttaaaggaattgacggaagggcaccaccaggagtggagcctg
cggcttaatttgactcaacacggggaaactcacccggcccggacactggaaggatggaca
gat--tgacagctctttcttgattcagtgggtggtggtgcatggccgttcttagttggtg
gagtgatttgtctggttaa--ttccgataacgaacgagactctgtcctgc-taaatag--
---taca--ctgatcttggatt---------accttta----------------tggtgt
ctca-gtcagt-gct--gac-ttcttagagggatacg-cggta------ctca-aaccgc
acgaaa-tagagcaataacaggtctgtgatgccctta-gatgtccggggccgcac-----
----------------------------------gcgcg-ctacaatgacagtatcagag
agtatta-acacctggtccgaaa-ggattgggaaatctt--ggcattattgtcacatcag
ggattgagacttgtaattatttctcatgaacgaggaattcccagtagatgcaagtcatca
gcttgcgtcgattacgtccctgccctttgtacacaccgcccgtcgctactaccgattgaa
tggtttagtgaggtcctcggattgtgacctctgc------agt----------gaaagct
gc-------attg-gttatgag-aaga-cgatcgaac-ttgatcatttagaggaag--t-
aaaagtcgtaacaaggtt-tccgtaggtgaacctgc------------------------
------------------------------------------------------------
------------------------------------------------------------
------------------------------------------------------------
------------------------------------------------------------
------------------------------------------------------------
-----------
>KC529470_Gieysztoria_acariaia
------------------------------------------------------------
-----------gatcctgccagtagtcat-atgcttgtctcaaagattaag-ccatgcat
gtataaggtcacaccc-t-ttgt-tcggtgaacctgca-aatggctcattaaatcagcta
ttgtttcttggatctta-cact--tttacttgg--ataactgcagtaattctg-gagcta
ataca-tgcc--a--a-agtgcttcagtcgc-a----------agattggagc-gggttt
attag-atca--aaatca-ac-cagt--c-------tcttcacggg------g-ac-tg-
t-tgg------------------gctga-tg-attctggataac-ca-ac--ctgaccgt
atga-cc--ttgtgtcgacggtgtatc-cttcaagtgtctgacctatca-actgtcgatg
gtgagtgatttgctca-ccatggtgatcacgggtaacggggaatcagtgttcgattccgg
agagggag-ccttagaaacggctaccacatctaaggaaggcagcaggcgcgcaaattacc
cactctcaatt----cgaggaggtagtga-cgaaaaataacgatgatagactc-attatg
aggcctatcaattggaatgagtacaa-tttaaatcc-ttt-aacgaggagccattgg-ag
ggcaag-tctggtgccagcagccgcggtaattccagct-ccaatagcgtatattaaattt
gttgcagttaaaaagctcgtagttggatctcaggtg-tg-------agtcg-gcgg-tac
agtctttttg--tattg-t---------aactgtt-cgt-tctccaccttca--att---
-g---agctgtt-gatgctctgtagtggtctttattgattgttg--ca-gagtgcacagc
acgtttactttgaaaaaattagagtgctcaaagcaggccg--t--tgtgcttgaatag-t
ct-tgcatggaataatggaagaggacttc---ggt-tct-attttgtt-g-gttttc-gg
t-t------cc-gaagtaa-tgattaaaagagacag-acgtgggcatttgtatggtggtg
ttagaggtga---aattcttggatcgccgccagacaaac-cacagcgaaagcatttgcca
aggatgccttcattaatcaagaacgaaagtcagaggttcgaagacgatcagataccgt-c
ctagttctgaccataaactttaccgactaaca-atcaagggcgg-tta---gaat-ttat
tgaccctcttggctg-t-ccct-gggaaacc-tgaagtat--aggttctggggggaatat
ggt-cacaaggctgaaacttaaaggaattgacggaagggcaccaccaggagtggagcctg
cggcttaatttgactcaacacggggaaactcacccggcccggacactggaaggatggaca
gat--tgacagctctttcttgattcagtgggtggtggtgcatggccgttcttagttggtg
gagtgatttgtctggttaa--ttccgataacgaacgagactctgtcctgc-taaatag--
---taca--ctgatcttggact---------acctttac---------------tggtgt
ctca-gtcagt-gct--gac-ttcttagagggatacg-cggta------ctca-aaccgc
acgaaa-tagagcaataacaggtctgtgatgccctta-gatgtccggggccgcac-----
----------------------------------gcgcg-ctacaatgacagtatcagag
agtatta-acacctggtccgaaa-ggattgggaaatctt--ggcattattgtcacatcag
ggattgagacttgtaattatttctcatgaacgaggaattcccagtagatgcaagtcatca
gcttgcgtcgattacgtccctgccctttgtacacaccgcccgtcgctactaccgattgaa
tggtttagtgaggtcctcggattgtgacctctgc------agt----------gcaagct
gc-------attg-gttatgag-aaga-cgatcgaac-ttgatcatttagaggaag--t-
aaaagtcgtaacaaggtt-tccgtaggtgaacctgc-ag---------------------
------------------------------------------------------------
------------------------------------------------------------
------------------------------------------------------------
------------------------------------------------------------
------------------------------------------------------------
-----------
>KC529469_Gieysztoria_sp5_red
------------------------------------------------------------
-----------gatcctgccagtagtcat-atgcttgtctcaaagattaag-ccatgcat
gtataagatcaca-cc-c-ttga-atggtgaatctgca-aatggctcattaaatcagcta
ttgtttcttggatctta-cact--tttacttgg--ataactgcagtaattctg-gagcta
ataca-tgcc--a--a-agtgcttcagtcgc-a----------agattggagc-gggttt
attag-atca--aaatca-ac-cggt--t-------tcttcacgga------g-ac-tg-
t-tgg------------------gctga-tg-attctggataac-ca-ac--ctgaccgt
atga-cc--ttgtgtcgacggcgtatc-cttcaagtgtctgacctatca-actgtcgatg
gtgagtgatttgctca-ccatggtgatcacgggtaacggggaatcagtgttcgattccgg
agagggag-ccttagaaacggctaccacatctaaggaaggcagcaggcgcgcaaattacc
cactctcaatt----cgaggaggtagtga-cgaaaaataacgatgatagactc-attatg
aggcctatcaattggaatgagtacaa-tttaaatcc-ttt-aacgaggagccattgg-ag
ggcaag-tctggtgccagcagccgcggtaattccagct-ccaatagcgtatattaaattt
gttgcagttaaaaagctcgtagttggatctcaggtg-tg-------agtcg-gcgg-tac
agtctttttg--tattg-t---------aactgtt-cgt-gctctgccttca--att---
-g---agctgtt-gatgctctgcagtggtcttcattgattgttg--ta-gagtgcacagc
acgtttactttgaaaaaattagagtgctcaaagcaggccg-tt--tgtgcttgaatag-t
ct-tgcatggaataatggaagaggacttc---ggt-tct-attttgtt-g-gttttc-gg
t-a------cc-gaagtaa-tgattaaaagagacag-acgtgggcatttgtatggtggtg
ttagaggtga---aattcttggatcgccgccagacaaac-cacagcgaaagcatttgcca
aggatgccttcattaatcaagaacgaaagtcagaggttcgaagacgatcagataccgt-c
ctagttctgaccataaactttaccgactaaca-atcaagggcgg-tta---gaat-ttat
tgaccctcttggctg-t-ccct-gggaaacc-tgaagtat--aggttctggggggaatat
ggt-cacaaggctgaaacttaaaggaattgacggaagggcaccaccaggagtggagcctg
cggcttaatttgactcaacacggggaaactcacccggcccggacactggaaggatggaca
gat--tgacagctctttcttgattcagtgggtggtggtgcatggccgttcttagttggtg
gagtgatttgtctggttaa--ttccgataacgaacgagactctgtcctgc-taaatag--
---tacg--ctgatcctggaca---------ttcggtaa-------------aacgttgt
ctca-gtcagt-gct--gac-ttcttagagggatacg-cggta------ttca-aaccgc
acgaaa-tagagcaataacaggtctgtgatgccctta-gatgtccggggccgcac-----
----------------------------------gcgcg-ctacaatgacagtatcagag
agtatta-ccacctgatccgaga-ggattgggaaatctt--ggcattattgtcacatcag
ggattgagacttgtaattatttctcatgaacgaggaattcccagtagatgcaagtcatca
gcttgcgtcgattacgtccctgccctttgtacacaccgcccgtcgctactaccgattgaa
tggtttagtgaggtcctcggatcgtgacctctgc------agt----------gaaagct
gc-------attg-gttgtgag-aaga-cgatcgaac-ttgatcatttagaggaag--t-
aaaagtcgtaacaaggtt-tccgtaggtgaacctgc-aga-tgg----------------
------------------------------------------------------------
------------------------------------------------------------
------------------------------------------------------------
------------------------------------------------------------
------------------------------------------------------------
-----------
>KC529468_Gieysztoria_infundibuliformis
------------------------------------------------------------
-----------gatcctgccagtagtcat-atgcttgtntcaaagattaag-ccatgcat
gtataagatcacaccc-t-tcgg-tcggtgaatctgca-aatggctcattaaatcagcta
ttgtttcttggatctta-cact--cttacttgg--ataactgcagtaattctg-gagcta
ataca-tgcc--a--attgtgcttcagtcgc-a----------agattggagc-gggttt
attag-atca--aaatca-ac-cagt--t-------tcctcacggg------a-ac-tg-
t-tgg------------------gctga-tg-attctggataac-ca-ac--ctgaccgt
acga-cc--tcgtgtcgacggcgtatc-cttcaagtgtctgacctatca-actgtcgatg
gtgagtgatttgctca-ccatggtgataacgggtaacggggaatcagtgttcgattccgg
agagggag-ccttagaaacggctaccacatctaaggaaggcagcaggcgcgcaaattacc
cactctcaatt----cgaggaggtagtga-cgaaaaataacgatgatagactc-attatg
aggcctatcaattggaatgagtacaa-tttaaatcc-ttt-aacgaggagccattgg-ag
ggcaag-tctggtgccagcagccgcggtaattccagct-ccaatagcgtatattaaattt
gttgcagttaaaaagctcgtagttggatctcaggtg-tg-------agtcg-gcgg-tac
agtctttttg--tattg-t---------aactgtt-cgt-tctccaccttca--att---
-g---agctgtt-gatgctttgtagtggtcttcattgactgttg--ca-gagtgcacagc
acgtttactttgaaaaaattagagtgctcaaagcaggccg--t--tgtgcttgaatag-t
ct-tgcatggaataatggaagaggacttc---ggt-tct-attttgtt-g-gttttc-gg
t-t------cc-gaagtaa-tgattaaaagagacag-acgtgggcatttgtatggtggtg
ttagaggtga---aattcttggatcgccgccagacaaac-tacagcgaaagcatttgcca
aggatgccttcattaatcaagaacgaaagtcagaggttcgaagacgatcagataccgt-c
ctagttctgaccataaactttaccgactaaca-atcgagagcgg-tta---gaat-ttat
tgaccctcttggctg-t-ccct-gggaaacc-tgaagtat--aggttctggggggaatat
ggt-cacaaggctgaaacttaaaggaattgacggaagggcaccaccaggagtggagcctg
cggcttaatttgactcaacacggggaaactcacccggcccggacactgtaaggatggaca
gat--tgacagctctttcttgattcagtgggtggtggtgcatggccgttcttagttggtg
gagtgatttgtctggttaa--ttccgataacgaacgagactctgtcctgc-taaatag--
---taca--ctgatcttggatt---------accttcg-----------------ggtgt
ctca-gtcagt-gct--gac-ttcttagagggatacg-cggta------ttca-aaccgc
acgaaa-tagagcaataacaggtctgtgatgccctta-gatgtccggggccgcac-----
----------------------------------gcgcg-ctacaatgacagtatcagag
agtatta-ccacctggtccgaaa-ggattgggaaatctt--ggcattattgtcacatcag
ggattgagacttgtaattatttctcatgaacgaggaattcccagtagatgcaagtcatca
gcttgcgtcgattacgtccctgccctttgtacacaccgcccgtcgctactaccgattgaa
tggtttagtgaggtcctcggatcgtgacctttgt------agt----------gaaagct
gc-------gttg-gttatgag-aaga-cgatcgaac-ttgatcatttagaggaag--t-
aaaagtcgtaacaaggtt-tccgtaggtgaacctgc-aga-tggat--------------
------------------------------------------------------------
------------------------------------------------------------
------------------------------------------------------------
------------------------------------------------------------
------------------------------------------------------------
-----------
>KC529467_Gieysztoria_garudae
------------------------------------------------------------
----------------------tagtcat-atgcttgtctcaaagattaag-ccatgcat
gtataagatcaca-cc-c-ttgt-tcggtgaatctgca-aatggctcattaaatcagcta
ttgtttcttggatctta-cact--tttacttgg--ataactgcagtaattctg-gagcta
ataca-tgcc--a--a-agtgcttcagtcgc-a----------agattggagc-gggttt
attag-atca--aaatca-ac-cagt--t-------ttttcacgaa------a-ac-tg-
t-tgg------------------gctga-tg-attctggataac-ca-ac--ctgaccgt
atga-cc--ttgtgtcgacggcgtatc-cttcaagtgtctgacctatca-actgtcgatg
gtgagtgatttgctca-ccatggtgatcacgggtaacggggaatcagtgttcgattccgg
agagggag-ccttagaaacggctaccacatctaaggaaggcagcaggcgcgcaaattacc
cactctcaatt----cgaggaggtagtga-cgaaaaataacgatgatagactc-attatg
aggcctatcaattggaatgagtacaa-tttaaatcc-ttt-aacgaggagccattgg-ag
ggcaag-tctggtgccagcagccgcggtaattccagct-ccaatagcgtatattaaattt
gttgcagttaaaaagctcgtagttggatctcaggtg-tg-------agttg-acgg-tac
agtctttttg--tactg-t---------aactgtt-cat-tctccaccttca---tt---
-g---agttgtt-gatgctctgtagtggtcttcattgattgttg--ca-gagtgcacagc
acgtttactttgaaaaaattagagtgctcaaagcaggccg-ct--tgtgcttgaatag-t
ct-tgcatggaataatggaagaggacttc---ggt-tct-attttgtt-g-gttttc-gg
t-t------cc-ggagtaa-tgattaaaagagactg-acgtgggcatttgtatggtggtg
ttagaggtga---aattcttggatcgccgccagacaaac-tacagcgaaagcatttgcca
aggatgccttcattaatcaagaacgaaagtcagaggttcgaagacgatcagataccgt-c
ctagttctgaccataaactttaccgactaaca-atcaggggtgg-tta---gaat-ttat
tgaccctcctggctg-t-ccct-gggaaacc-tgaagtat--aggttctggggggaatat
ggt-cacaaggctgaaacttaaaggaattgacggaagggcaccaccaggagtggagcctg
cggcttaatttgactcaacacggggaaactcacccggcccggacactggaaggatggaca
gat--tgacagctctttcttgattcagtgggtggtggtgcatggccgttcttagttggtg
gagtgatttgtctggttaa--ttccgataacgaacgagactctgtcctgc-taaatag--
---taca--ctgatcttggatt---------actctt---------------cggagtgt
ctca-gtcagt-gct--gac-ttcttagagggatacg-cggta------ctca-aaccgc
acgaaa-tagagcaataacaggtctgtgatgccctta-gatgtccggggccgcac-----
----------------------------------gcgcg-ctacaatgacagtatcagag
agtatta-ccacctggtccgaaa-ggattgggaaatctt--ggcattattgtcacatcag
ggattgagacttgtaattatttctcatgaacgaggaattcccagtagatgcaagtcatca
gcttgcgtcgattacgtccctgccctttgtacacaccgcccgtcgctactaccgattgaa
tggtttagtgaggtcctcggattgtgacctttgc------agt----------gcaagct
gc-------gttg-gttatgag-aaga-cgatcgaac-ttgatcatttagaggaag--t-
aaaagtcgtaacaaggtt-tccgtaggtgaacct--------------------------
------------------------------------------------------------
------------------------------------------------------------
------------------------------------------------------------
------------------------------------------------------------
------------------------------------------------------------
-----------
>KC529466_Gieysztoria_ashokae
------------------------------------------------------------
--------------cctgccagtagtcat-atgcttgtctcaaagattaag-ccatgcat
gtataagatcaca-cc-c-tcgt-tcggtgaatctgca-aatggctcattaaatcagcta
ttgtttcttggatctta-cact--tttacttgg--ataactgcagtaattctg-gagcta
ataca-tgcc--a--a-agagcttcaatcgc-a----------agattggagc-gggttt
attag-atca--aaatca-ac-cagt--t-------ttttcacgaa------a-ac-tg-
t-tgg------------------gctga-tg-attctggataac-ca-ac--ctgaccgt
atga-cc--ttgtgtcgacggcgtatc-cttcaagtgtctgacctatca-actgtcgatg
gtgagtgatttgctca-ccatggtgatcacgggtaacggggaatcagtgttcgattccgg
agagggag-ccttagaaacggctaccacatctaaggaaggcagcaggcgcgcaaattacc
cactctcaatt----cgaggaggtagtga-cgaaaaataacgatgatagactc-attatg
aggcctatcaattggaatgagtacaa-tttaaatcc-ttt-aacgaggagccattgg-ag
ggcaag-tctggtgccagcagccgcggtaattccagct-ccaatagcgtatattaaattt
gttgcagttaaaaagctcgtagttggatctcaggtg-tg-------agttg-acgg-tac
aatctttttg--tattg-t---------aactgtt-cat-tctccaccttca---tt---
-g---agttgtt-gatgctctgtagtggtctttattgattgtta--ct-gagtgcacagc
acgtttactttgaaaaaattagagtgctcaaagcaggccg-ct--tgtgcttgaatag-t
ct-tgcatggaataatggaagaggacttc---ggt-tct-attttgtt-g-gttttc-gg
t-t------cc-ggagtaa-tgattaaaagagactg-acgtgggcatttgtatggtggtg
ttagaggtga---aattcttggatcgccgccagacaaac-tacagcgaaagcatttgcca
aggatgccttcattaatcaagaacgaaagtcagaggttcgaagacgatcagataccgt-c
ctagttctgaccataaactttaccgactaaca-atcaggggtgg-tta---gaat-ttat
tgaccctcctggctg-t-ccct-gggaaacc-tgaagtat--aggttctggggggaatat
ggt-cacaaggctgaaacttaaaggaattgacggaagggcaccaccaggagtggagcctg
cggcttaatttgactcaacacggggaaactcacccggcccggacactggaaggatggaca
gat--tgacagctctttcttgattcagtgggtggtggtgcatggccgttcttagttggtg
gagtgatttgtctggttaa--ttccgataacgaacgagactctgtcctgc-taaatag--
---taca--ctgatcttggat----------acaatt---------------cattgtgt
ctca-gtcagt-gct--gac-ttcttagagggatacg-cggta------ctta-aaccgc
acgaaa-tagagcaataacaggtctgtgatgccctta-gatgtccggggccgcac-----
----------------------------------gcgcg-ctacaatgacagtatcagag
agtatta-ccacctggtccgaaa-ggattgggaaatctt--ggcattattgtcacatcag
ggattgagacttgtaattatttctcatgaacgaggaattcccagtagatgcaagtcatca
gcttgcgtcgattacgtccctgccctttgtacacaccgcccgtcgctactaccgattgaa
tggtttagtgaggtcctcggattgtgacctttgc------agt----------gaaagct
gc-------gttg-gttgtgag-aaga-cgatcgaac-ttgatcatttagaggaag--t-
aaaagtcgtaacaaggtt-tccgtaggtgaacctgc-aga-tggatcaa-----------
------------------------------------------------------------
------------------------------------------------------------
------------------------------------------------------------
------------------------------------------------------------
------------------------------------------------------------
-----------
>KC529465_Gieysztoria_zuluensis
------------------------------------------------------------
--------------cctgccagtagtcat-atgcttgtctcaaagattaag-ccatgcat
gtataagatcaca-cc-t-ttga-atggtgaatctgca-aatggctcattaaatcagcta
ttgtttcttggatctta-cacttatttacttgg--ataactgcagtaattctg-gagcta
ataca-tgcc--a--a-agagcttcaatcgc-a----------agattggagc-gggttt
attag-atca--aaatca-ac-cagt--t-------ttttcacgaa------a-ac-tg-
t-tgg------------------gctga-tg-attctggataac-ca-ac--ctgaccgt
atga-cc--ttgtgtcgacggcgtatc-cttcaagtgtctgacctatca-actgtcgatg
gtgagtgatttgctca-ccatggtgatcacgggtaacggggaatcagtgttcgattccgg
agagggag-ccttagaaacggctaccacatctaaggaaggcagcaggcgcgcaaattacc
cactctcaatt----cgaggaggtagtga-cgaaaaataacgatgatagactc-attatg
aggcctatcaattggaatgagtacaa-tttaaatcc-ttt-aacgaggagcaattgg-ag
ggcaag-tctggtgccagcagccgcggtaattccagct-ccaatagcgtatattaaattt
gttgcagttaaaaagctcgtagttggatctcaggtg-tg-------agttg-acgg-tac
agtctttttg--tattg-t---------aactgtt-cat-tctccaccttca---tt---
-g---agttgtt-gatgctttgtagtggtctttattgattgtta--ca-gagtgcacagc
acgtttactttgaaaaaattagagtgctcaaagcaggccg-ct--tgtgcttgaatag-t
ct-tgcatggaataatggaagaggacttc---ggt-tct-attttgtt-g-gttttc-gg
t-t------cc-ggagtaa-tgattaaaagagactg-acgtgggcatttgtatggtggtg
ttagaggtga---aattcttggatcgccgccagacaaac-tacagcgaaagcatttgcca
aggatgccttcattaatcaagaacgaaagtcagaggttcgaagacgatcagataccgt-c
ctagttctgaccataaactttaccgactaaca-atcaggggtgg-tta---gaat-ttat
tgaccctcctggctg-t-ccct-gggaaacc-tgaagtat--aggttctggggggaatat
ggt-cacaaggctgaaacttaaaggaattgacggaagggcaccaccaggagtggagcctg
cggcttaatttgactcaacacggggaaactcacccggcccggacactggaaggatggaca
gat--tgacagctctttcttgattcagtgggtggtggtgcatggccgttcttagttggtg
gagtgatttgtctggttaa--ttccgataacgaacgagactctgtcctgc-taaatag--
---taca--ctgatcttggatt---------actccttt------------gttgggtgt
ctca-gtcagt-gct--gac-ttcttagagggatacg-cggta------ttca-aaccgc
acgaaa-tagagcaataacaggtctgtgatgccctta-gatgtccggggccgcac-----
----------------------------------gcgcg-ctacaatgacagtatcagag
agtatta-ccacctggtccgaaa-ggattgggaaatctt--ggcattattgtcacatcag
ggattgagacttgtaattatttctcatgaacgaggaattcccagtagatgcaagtcatca
gcttgcgtcgattacgtccctgccctttgtacacaccgcccgtcgctactaccgattgaa
tggtttagtgaggtcctcggattgtgacctttgc------agt----------gcaagct
gc-------gttg-gttgtgag-aaga-cgatcgaac-ttgatcatttagaggaag--t-
aaaagtcgtaacaaggtt-tccgtaggtgaacctgc-ag---------------------
------------------------------------------------------------
------------------------------------------------------------
------------------------------------------------------------
------------------------------------------------------------
------------------------------------------------------------
-----------
>KC529464_Gieysztoria_sp4
------------------------------------------------------------
tacctg-gtt-gatcctgccagtagtcat-atgcttgtctcaaagattaag-ccatgcat
gtataagatcaca-cc-c-tagt-atggtgaatctgcg-aatggctcattaaatcagcta
ttgtttcttggatctta-cact--tttacttgg--ataactgcagtaattctg-gagcta
ataca-tgcc--a--a-tgtgcttcagtcgc-a----------agattggagc-gggttt
attag-atca--aaatca-ac-cagt--c-------tccttgtgg-------g-ac-tg-
t-tgg------------------gctga-tg-attctggataac-ca-ac--ctgaccgt
atga-cc--ttgtgtcgacggcgtatc-cttcaagtgtctgacctatca-actgtcgatg
gtgagtgatttgctca-ccatggtgatcacgggtaacggggaatcagtgttcgattccgg
agagggag-ccttagaaacggctaccacatctaaggaaggcagcaggcgcgcaaattacc
cactctcaatt----cgaggaggtagtga-cgataaataacgatgatagactc-attatg
aggcctatcaattggaatgagtacaa-tttaaatcc-ttt-aacgaggagcaattgg-ag
ggcaag-tctggtgccagcagccgcggtaattccagct-ccaatagcgtatattaaattt
gttgcagttaaaaagctcgtagttggatctcaggtg-tg-------agtcg-gcgg-tac
agtcttcttg--tattg-t---------tactgtt-cgt-tctccaccttca--ata---
-t---agctgtt-gatgctctgtagtggtcttcactgattgttg--ca-gagtgcacagc
acgtttactttgaaaaaattagagtgctcaaagcaggccg-ct--tgtgcttgaatag-t
ct-tgcatggaataatggaagaggacttc---ggt-tct-attttgtt-g-gttttc-gg
t-t------cc-gaagtaa-tgattaaaagagacag-acgtgggcatttgtatggtggtg
ttagaggtga---aattcttggatcgccgccagacaaac-tacagcgaaagcatttgcca
aggatgccttcattaatcaagaacgaaagtcagaggttcgaagacgatcagataccgt-c
ctagttctgaccataaactttaccgactaaca-atcaggggcgg-tta---gaat-ttat
tgaccctcctggctg-t-ccct-gggaaacc-tgaagtat--aggttctggggggaatat
ggt-cacaaggctgaaacttaaaggaattgacggaagggcaccaccaggagtggagcctg
cggcttaatttgactcaacacggggaaactcacccggcccggacactggaaggatggaca
gat--tgacagctctttcttgattcagtgggtggtggtgcatggccgttcttagttggtg
gagtgatttgtctggttaa--ttccgataacgaacgagactctgtcctgc-taaatag--
---taca--ttgatcctggatc---------a-ccct-a-------------aaagtgat
ctta-gtcaat-gct--gac-ttcttagagggatacg-cggta------ttta-aaccgc
acgaaa-tagagcaataacaggtctgtgatgccctta-gatgtccggggccgcac-----
----------------------------------gcgcg-ctacaatgacagtatcagag
agtatta-ccacctggtccgaaa-ggattgggaaatctt--ggcattattgtcacatcag
ggattgagacttgtaattatttctcatgaacgaggaattcccagtagatgcaagtcatca
gcttgcgtcgattacgtccctgccctttgtacacaccgcccgtcgctactaccgattgaa
tggtttagtgaggtcctcggatcgtgacctttgc------agt----------tcacgct
gc-------gttg-gttatgag-aaga-cgatcgaac-ttgatcatttagaggaag--t-
aaaagtcgtaacaaggtt-tccgtaggtgaacctgc-aga-tggatcaa-----------
------------------------------------------------------------
------------------------------------------------------------
------------------------------------------------------------
------------------------------------------------------------
------------------------------------------------------------
-----------
>KC529463_Gieysztoria_knipovici
------------------------------------------------------------
tacctg-gtt-gatcctgccagtagtcat-atgcttgtctcaaagattaag-ccatgcat
gtataagatcaca-cc-c-tagt-atggtgaatctgcg-aatggctcattaaatcagcta
ttgtttcttggatctta-cact--tttacttgg--ataactgcagtaattctg-gagcta
ataca-tgcc--a--a-agtgcttcagtcgc-a----------agattggagc-gggttt
attag-atca--aaatca-ac-cggt--c-------tcctcgtgg-------g-ac-tg-
t-tgg------------------gctga-tg-attctggataac-ca-ac--ctgaccgt
atga-cc--ttgtgtcgacggcgtatc-cttcaagtgtctgacctatca-actgtcgatg
gtgagtgatttgctca-ccatggtgatcacgggtaacggggaatcagtgttcgattccgg
agagggag-ccttagaaacggctaccacatctaaggaaggcagcaggcgcgcaaattacc
cactctcaatt----cgaggaggtagtga-cgataaataacgatgatagactc-attatg
aggcctatcaattggaatgagtacaa-tttaaatcc-ttt-aacgaggagcaattgg-ag
ggcaag-tctggtgccagcagccgcggtaattccagct-ccaatagcgtatattaaattt
gttgcagttaaaaagctcgtagttggatctcaggtg-tg-------agtcg-acgg-tac
aatctttctt--gattg-t---------tactgct-cgt-tctccgccttca--ata---
-t---agctgtt-gatgctctgtagtggtcttcattgactgttg--ca-gagtgcacagc
acgtttactttgaaaaaattagagtgctcaaagcaggcca-tt--tgtgcttgaatag-t
ct-tgcatggaataatggaagaggacttc---ggt-tct-attttgtt-g-gttttc-gg
t-t------cc-gaagtaa-tgattaaaagagacag-acgtgggcatttgtatggtggtg
ttagaggtga---aattcttggatcgccgccagacaaac-tacagcgaaagcatttgcca
aggatgccttcattaatcaagaacgaaagtcagaggttcgaagacgatcagataccgt-c
ctagttctgaccataaactttaccgactaaca-atcaggggcgg-tta---gatt-ttat
tgaccctcctggctg-t-ccct-gggaaacc-tgaagtat--aggttctggggggaatat
ggt-cacaaggctgaaacttaaaggaattgacggaagggcaccaccaggagtggagcctg
cggcttaatttgactcaacacggggaaactcacccggcccggacactggaaggatggaca
gat--tgacagctctttcttgattcagtgggtggtggtgcatggccgttcttagttggtg
gagtgatttgtctggttaa--ttccgataacgaacgagactctgtcctgc-taaatag--
---tacg--ttgatcctggatt---------g-ccctaa-------------aaagtgat
ctca-gtcaac-gct--gac-ttcttagagggatacg-cggta------ttta-aaccgc
acgaaa-tagagcaataacaggtctgtgatgccctta-gatgtccggggccgcac-----
----------------------------------gcgcg-ctacaatgacagtatcagag
agtatta-acacctggtccgaaa-ggattgggaaatctt--ggcattattgtcacatcag
ggattgagacttgtaattatttctcatgaacgaggaattcccagtagatgcaagtcatca
gcttgcgtcgattacgtccctgccctttgtacacaccgcccgtcgctactaccgattgaa
tggtttagtgaggtcctcggatcgtgacctttgc------agt----------gaaagct
gc-------gttg-gttatgag-aaga-cgatcgaac-ttgatcatttagaggaag--t-
aaaagtcgtaacaaggtt-tccgtaggtgaacctgc-a----------------------
------------------------------------------------------------
------------------------------------------------------------
------------------------------------------------------------
------------------------------------------------------------
------------------------------------------------------------
-----------
>KC529462_Gieysztoria_sp8_sardinia
------------------------------------------------------------
--------------cctgccagtagtcat-atgcttgtctcaaagattaag-ccatgcat
gtataagatcacg-cc-c-ttga-atggcgaatctgcg-aatggctcattaaatcagcta
ttgtttcttggatctta-cact--cttacttgg--ataactgcagtaattctg-gagcta
ataca-tgcc--a--a-agtgcttcagtcgt-t----------agattggagc-gggttt
attag-atca--aaatca-ac-cggt--c-------tccttgtgg-------g-ac-tg-
t-tgg------------------gctga-tg-attctggataac-ca-ac--ctgaccgt
atga-cc--tagtgtcgacggcgtatc-cttcaagtgtctgacctatca-actgtcgatg
gtgagtgatttgctca-ccatggtgatcacgggtaacggggaatcagtgttcgattccgg
agagggag-ccttagaaacggctaccacatctaaggaaggcagcaggcgcgcaaattacc
cactctcaatt----cgaggaggtagtga-cgaaaaataacgatgatagactc-attatg
aggcctatcaattggaatgagtacaa-tttaaatcc-ttt-aacgaggagcaattgg-ag
ggcaag-tctggtgccagcagccgcggtaattccagct-ccaatagcgtatattaaattt
gttgcagttaaaaagctcgtagttggatctcaggtg-tg-------agtcg-gcgg-tgc
agtctttatg--tattg-t---------aactgtt-cgt-tctccgccttca--att---
-g---agctgtt-gatgctctgtagtggtcttcattgactgttg--ca-gagtgcacagc
acgtttactttgaaaaaattagagtgctcaaagcaggccg-tt--tgcgcttgaatag-t
ct-tgcatggaataatggaagaggacttc---ggt-tct-attttgtt-g-gttttc-gg
t-t------cc-ggagtaa-tgattaaaagagacag-acgtgggcatttgtatggtggtg
ttagaggtga---aattcttggatcgccgccagacaaac-tacagcgaaagcatttgcca
aggatgccttcattaatcaagaacgaaagtcagaggttcgaagacgatcagataccgt-c
ctagttctgaccataaactttaccgactaaca-atcaggggcgg-tta---gaat-ttat
tgaccctcctggctg-t-ccct-gggaaacc-tgaagtat--aggttctggggggaatat
ggt-cacaaggctgaaacttaaaggaattgacggaagggcaccaccaggagtggagcctg
cggcttaatttgactcaacacggggaaactcacccggcccggacactggaaggatggaca
gat--tgacagctctttcttgattcagtgggtggtggtgcatggccgttcttagttggtg
gagtgatttgtctggttaa--ttccgataacgaacgagactctgtcctgc-taaatag--
---tacg--ttgatcctgggtt---------g-ccttca-------------tg-gtgat
ctca-gtcaat-gct--gac-ttcttagagggatacg-cggta------ttta-aaccgc
acgaaa-tagagcaataacaggtctgtgatgccctta-gatgtccggggccgcac-----
----------------------------------gcgcg-ctacaatgacagtatcagag
agtatta-ccacctggtccgaaa-ggattgggaaatctt--ggcattattgtcacatcag
ggattgagacttgtaattatttctcatgaacgaggaattcccagtagatgcaagtcatca
gcttgcgtcgattacgtccctgccctttgtacacaccgcccgtcgctactaccgattgaa
tggtttagtgaggtcctcggatcgtgacctttgc------agt----------gaaagct
gc-------attg-gttatgag-aaga-cgatcgaac-ttgatcatttagaggaag--t-
aaaagtcgtaacaaggtt-tccgtaggtgaacctgc------------------------
------------------------------------------------------------
------------------------------------------------------------
------------------------------------------------------------
------------------------------------------------------------
------------------------------------------------------------
-----------
>KC529461_Gieysztoria_iberica
------------------------------------------------------------
--------------cctgccagtagtcat-atgcttgtctcaaagattaag-ccatgcat
gtataagatcacg-cc-c-ttga-atggcgaatctgcg-aatggctcattaaatcagcta
ttgtttcttggatctta-cact--tttacttgg--ataactgcagtaattctg-gagcta
ataca-tgcc--a--a-agtgcttcagtcgc-a----------agattggagc-gggttt
attag-atca--aaatca-ac-cggt--c-------tcctcgtgg-------g-ac-tg-
t-tgg------------------gctga-tg-attctggataac-ca-ac--ctgaccgt
atga-cc--ttgtgtcgacggcgtatc-cttcaagtgtctgacctatca-actgtcgatg
gtgagtgatttgctca-ccatggtgatcacgggtaacggggaatcagtgttcgattccgg
agagggag-ccttagaaacggctaccacatctaaggaaggcagcaggcgcgcaaattacc
cactctcaatt----cgaggaggtagtga-cgaaaaataacgatgatagactc-attatg
aggcctatcaattggaatgagtacaa-tttaaatcc-ttt-aacgaggagcaattgg-ag
ggcaag-tctggtgccagcagccgcggtaattccagct-ccaatagcgtatattaaattt
gttgcagttaaaaagctcgtagttggatctcaggtg-tg-------agtcg-gcgg-tgc
agtctttatg--tattg-t---------aactgtt-cgt-tctccgccttca--att---
-g---agctgtt-gatgctctgtagtggtcttcactgactgttg--ca-gagtgcacagc
acgtttactttgaaaaaattagagtgctcaaagcaggccg-tt--tgcgcttgaatag-t
ct-tgcatggaataatggaagaggacttc---ggt-tct-attttgtt-g-gttttc-gg
t-t------cc-ggagtaa-tgattaaaagagacag-acgtgggcatttgtatggtggtg
ttagaggtga---aattcttggatcgccgccagacaaac-tacagcgaaagcatttgcca
aggatgccttcattaatcaagaacgaaagtcagaggttcgaagacgatcagataccgt-c
ctagttctgaccataaactttaccgactaaca-atcaggggcgg-tta---gaat-ttat
tgaccctcctggctg-t-ccct-gggaaacc-tgaagtat--aggttctggggggaatat
ggt-cacaaggctgaaacttaaaggaattgacggaagggcaccaccaggagtggagcctg
cggcttaatttgactcaacacggggaaactcacccggcccggacactggaaggatggaca
gat--tgacagctctttcttgattcagtgggtggtggtgcatggccgttcttagttggtg
gagtgatttgtctggttaa--ttccgataacgaacgagactctgtcctgc-taaatag--
---tacg--ttgatcctggatt---------g-ccgtaa-------------aacgtgat
ctca-gtcaac-gct--gac-ttcttagagggatacg-cggta------ttta-aaccgc
acgaaa-tagagcaataacaggtctgtgatgccctta-gatgtccggggccgcac-----
----------------------------------gcgcg-ctacaatgacagtatcagag
agtatta-acacctggtccgaaa-ggattgggaaatctt--ggcattattgtcacatcag
ggattgagacttgtaattatttctcatgaacgaggaattcccagtagatgcaagtcatca
gcttgcgtcgattacgtccctgccctttgtacacaccgcccgtcgctactaccgattgaa
tggtttagtgaggtcctcggatcgtgacctttgc------agt----------gaaagct
gc-------attg-gttatgag-aaga-cgatcgaac-ttgatcatttagaggaag--t-
aaaagtcgtaacaaggtt-tccgtaggtgaacctgc-ag---------------------
------------------------------------------------------------
------------------------------------------------------------
------------------------------------------------------------
------------------------------------------------------------
------------------------------------------------------------
-----------
>KC529460_Gieysztoria_ornata
------------------------------------------------------------
-------------tcctgccagtagtcat-atgcttgtctcaaagattaag-ccatgcat
gtataagatcacg-cc-c-ttga-atggcgaatctgcg-aatggctcattaaatcagcta
ttgtttcttggatctta-cact--tttacttgg--ataactgcagtaattctg-gagcta
ataca-tgcc--a--a-agtgcttcaatcgc-a----------agattggagc-gggttt
attag-atca--aaatca-ac-cggt--c-------tcctcgtgg-------g-ac-tg-
t-tgg------------------gctga-tg-attctggataac-ca-ac--ctgaccgt
atga-cc--ttgtgtcgacggcgtatc-cttcaagtgtctgacctatca-actgtcgatg
gtgagtgatttgctca-ccatggtgatcacgggtaacggggaatcagtgttcgattccgg
agagggag-ccttagaaacggctaccacatctaaggaaggcagcaggcgcgcaaattacc
cactctcaatt----cgaggaggtagtga-cgaaaaataacgatgatagactc-attatg
aggcctatcaattggaatgagtacaa-tttaaatcc-ttt-aacgaggagcaattgg-ag
ggcaag-tctggtgccagcagccgcggtaattccagct-ccaatagcgtatattaaattt
gttgcagttaaaaagctcgtagttggatctcaggtg-tg-------agtcg-gcgg-tgc
agtctttatg--tactg-t---------aactgtt-cgt-tctccgccttca--att---
-g---agctgtt-gatgctctgtagtggtcttcactgactgttg--ca-gagtgcacagc
acgtttactttgaaaaaattagagtgctcaaagcaggccg-ct--tgtgcctgaatag-t
ct-tgcatggaataatggaagaggacttc---ggt-tct-attttgtt-g-gttttc-gg
t-t------cc-ggagtaa-tgattaaaagagactg-acgtgggcatttgtatggtggtg
ttagaggtga---aattcttggatcgccgccagacaaac-tacagcgaaagcatttgcca
aggatgccttcattaatcaagaacgaaagtcagaggttcgaagacgatcagataccgt-c
ctagttctgaccataaactttaccgactaaca-atcaggggcgg-tta---gaat-ttat
tgaccctcctggctg-t-ccct-gggaaacc-tgaagtat--aggttctggggggaatat
ggt-cacaaggctgaaacttaaaggaattgacggaagggcaccaccaggagtggagcctg
cggcttaatttgactcaacacggggaaactcacccggcccggacactggaaggatggaca
gat--tgacagctctttcttgattcagtgggtggtggtgcatggccgttcttagttggtg
gagtgatttgtctggttaa--ttccgataacgaacgagactctgtcctgc-taaatag--
---tacg--ttgatcctggatt---------g-ccgtaa-------------aaagtgat
ctca-gtcaac-gct--gac-ttcttagagggatacg-cggta------ttta-aaccgc
acgaaa-tagagcaataacaggtctgtgatgccctta-gatgtccggggccgcac-----
----------------------------------gcgcg-ctacaatgacagtatcagag
agtatta-ccacctggtccgaaa-ggattgggaaatctt--agcattattgtcacatcag
ggattgagacttgtaattatttctcatgaacgaggaattcccagtagatgcaagtcatca
gcttgcgtcgattacgtccctgccctttgtacacaccgcccgtcgctactaccgattgaa
tggtttagtgaggtcctcggatcgtgaccttcgc------agt----------gcaagct
gc-------attg-gttatgag-aaga-cgatcgaac-ttgatcatttagaggaag--t-
aaaagtcgtaacaaggtt-tccgtaggtgaacctgc-a----------------------
------------------------------------------------------------
------------------------------------------------------------
------------------------------------------------------------
------------------------------------------------------------
------------------------------------------------------------
-----------
>KC529459_Gieysztoria_cuspidata
------------------------------------------------------------
-----------gatcctgccagtagtcat-atgcttgtctcaaagattaag-ccatgcat
gtataagatcacg-cc-c-ttga-atggcgaatctgcg-aatggctcattaaatcagcta
ttgtttcttggatctta-cact--tttacttgg--ataactgcagtaattctg-gagcta
ataca-tgcc--a--a-agtgcttcattcgc-a----------aggatggagc-gggttt
attag-atca--aaatca-ac-cggt--c-------tcctcgtgg-------g-ac-tg-
t-tgg------------------gctga-tg-attctggataac-ca-ac--ctgaccgt
atga-cc--ttgtgtcgacggcgtatc-cttcaagtgtctgacctatca-actgtcgatg
gtgagtgatttgctca-ccatggtgatcacgggtaacggggaatcagtgttcgattccgg
agagggag-ccttagaaacggctaccacatctaaggaaggcagcaggcgcgcaaattacc
cactctcaatt----cgaggaggtagtga-cgaaaaataacgatgatagactc-attatg
aggcctatcaattggaatgagtacaa-tttaaatcc-ttt-aacgaggatcaattgg-ag
ggcaag-tctggtgccagcagccgcggtaattccagct-ccaatagcgtatattaaattt
gttgcagttaaaaagctcgtagttggatctcaggtg-tg-------agtcg-gcgg-tac
agtctttatg--tattg-t---------cactgtt-cgt-tctccgccttca--att---
-g---agctgtt-gatgctctgtagtggtctttactgattgttg--ca-gagtgcacagc
acgtttactttgaaaaaattagagtgctcaaagcaggccg-ct--tgtgcttgaatag-t
ct-tgcatggaataatggaagaggacttc---ggt-tct-attttgtt-g-gttttc-gg
t-t------cc-gaggtaa-tgattaaaagagacag-acgtgggcatttgtatggtggtg
ttagaggtga---aattcttggatcgccgccagacaaac-tacagcgaaagcatttgcca
aggatgccttcattaatcaagaacgaaagtcagaggttcgaagacgatcagataccgt-c
ctagttctgaccataaactttaccgactaaca-atcaggggcgg-tta---gaat-ttat
tgaccctcctggctg-t-ccct-gggaaacc-tgaagtat--aggttctggggggaatat
ggt-cacaaggctgaaacttaaaggaattgacggaagggcaccaccaggagtggagcctg
cggcttaatttgactcaacacggggaaactcacccggcccggacactggaaggatggaca
gat--tgacagctctttcttgattcagtgggtggtggtgcatggccgttcttagttggtg
gagtgatttgtctggttaa--ttccgataacgaacgagactctgtcctgc-taaatag--
---taca--ttgatcctggatc---------g-ccgtca-------------aaagtgat
ctca-gtcaat-gct--gac-ttcttagagggatacg-cggta------ttta-aaccgc
acgaaa-tagagcaataacaggtctgtgatgccctta-gatgtccggggccgcac-----
----------------------------------gcgcg-ctacaatgacagtatcagag
agtatta-ccacctggtccgaaa-ggattgggaaatctt--ggcattattgtcacatcag
ggattgagacttgtaattatttctcatgaacgaggaattcccagtagatgcaagtcatca
gcttgcgtcgattacgtccctgccctttgtacacaccgcccgtcgctactaccgattgaa
tggtttagtgaggtcctcggatcgtgaccttcgc------agt----------gcaagct
gc-------atcg-gttatgag-aaga-cgatcgaac-ttgatcatttagaggaag--t-
aaaagtcgtaacaaggtt-tccgtaggtgaacctgc-ag---------------------
------------------------------------------------------------
------------------------------------------------------------
------------------------------------------------------------
------------------------------------------------------------
------------------------------------------------------------
-----------
>KC529458_Gieysztoria_cuspidata
------------------------------------------------------------
----tg-gtt-gatcctgccagtagtcat-atgcttgtctcaaagattaag-ccatgcat
gtataagatcacg-cc-c-ttga-atggcgaatctgcg-aatggctcattaaatcagcta
ttgtttcttggatctta-cact--tttacttgg--ataactgcagtaattctg-gagcta
ataca-tgcc--a--a-agtgcttcattcgc-a----------aggatggagc-gggttt
attag-atca--aaatca-ac-cggt--c-------tcctcgtgg-------g-ac-tg-
t-tgg------------------gctga-tg-attctggataac-ca-ac--ctgaccgt
atga-cc--ttgtgtcgacggcgtatc-cttcaagtgtctgacctatca-actgtcgatg
gtgagtgatttgctca-ccatggtgatcacgggtaacggggaatcagtgttcgattccgg
agagggag-ccttagaaacggctaccacatctaaggaaggcagcaggcgcgcaaattacc
cactctcaatt----cgaggaggtagtga-cgaaaaataacgatgatagactc-attatg
aggcctatcaattggaatgagtacaa-tttaaatcc-ttt-aacgaggatcaattgg-ag
ggcaag-tctggtgccagcagccgcggtaattccagct-ccaatagcgtatattaaattt
gttgcagttaaaaagctcgtagttggatctcaggtg-tg-------agtcg-gcgg-tac
agtctttatg--tattg-t---------cactgtt-cgt-tctccgccttca--att---
-g---agctgtt-gatgctctgtagtggtctttactgattgttg--ca-gagtgcacagc
acgtttactttgaaaaaattagagtgctcaaagcaggccg-ct--tgtgcttgaatag-t
ct-tgcatggaataatggaagaggacttc---ggt-tct-attttgtt-g-gttttc-gg
t-t------cc-gaggtaa-tgattaaaagagacag-acgtgggcatttgtatggtggtg
ttagaggtga---aattcttggatcgccgccagacaaac-tacagcgaaagcatttgcca
aggatgccttcattaatcaagaacgaaagtcagaggttcgaagacgatcagataccgt-c
ctagttctgaccataaactttaccgactaaca-atcaggggcgg-tta---gaat-ttat
tgaccctcctggctg-t-ccct-gggaaacc-tgaagtat--aggttctggggggaatat
ggt-cacaaggctgaaacttaaaggaattgacggaagggcaccaccaggagtggagcctg
cggcttaatttgactcaacacggggaaactcacccggcccggacactggaaggatggaca
gat--tgacagctctttcttgattcagtgggtggtggtgcatggccgttcttagttggtg
gagtgatttgtctggttaa--ttccgataacgaacgagactctgtcctgc-taaatag--
---taca--ttgatcctggatc---------g-ccgtca-------------aaagtgat
ctca-gtcaat-gct--gac-ttcttagagggatacg-cggta------ttta-aaccgc
acgaaa-tagagcaataacaggtctgtgatgccctta-gatgtccggggccgcac-----
----------------------------------gcgcg-ctacaatgacagtatcagag
agtatta-ccacctggtccgaaa-ggattgggaaatctt--ggcattattgtcacatcag
ggattgagacttgtaattatttctcatgaacgaggaattcccagtagatgcaagtcatca
gcttgcgtcgattacgtccctgccctttgtacacaccgcccgtcgctactaccgattgaa
tggtttagtgaggtcctcggatcgtgaccttcgc------agt----------gcaagct
gc-------atcg-gttatgag-aaga-cgatcgaac-ttgatcatttagaggaag--t-
aaaagtcgtaacaaggtt-tccgtaggtgaacctg-------------------------
------------------------------------------------------------
------------------------------------------------------------
------------------------------------------------------------
------------------------------------------------------------
------------------------------------------------------------
-----------
>KC529457_Gieysztoria_cf_cuspidata_NVS2013
------------------------------------------------------------
------------------ccagtagtcat-atgcttgtctcaaagattaag-ccatgcat
gtataagatcacg-cc-c-ttga-atggcgaatctgcg-aatggctcattaaatcagcta
ttgtttcttggatctta-cact--tttacttgg--ataactgcagtaattctg-gagcta
ataca-tgcc--a--a-agtgcttcatccgc-a----------aggatggagc-gggttt
attag-atca--aaatca-ac-cggt--c-------tcctcgtgg-------g-ac-tg-
t-tgg------------------gctga-tg-attctggataac-ca-ac--ctgaccgt
atga-cc--ttgtgtcgacggcgtatc-cttcaagtgtctgacctatca-actgtcgatg
gtgagtgatttgctca-ccatggtgatcacgggtaacggggaatcagtgttcgattccgg
agagggag-ccttagaaacggctaccacatctaaggaaggcagcaggcgcgcaaattacc
cactctcaatt----cgaggaggtagtga-cgaaaaataacgatgatagactc-attatg
aggcctatcaattggaatgagtacaa-tttaaatcc-ttt-aacgaggatcaattgg-ag
ggcaag-tctggtgccagcagccgcggtaattccagct-ccaatagcgtatattaaattt
gttgcagttaaaaagctcgtagttggatctcaggtg-tg-------agtcg-gtgg-tac
agtctttatg--tattg-t---------cactgtc-cgt-tctccgccttca--att---
-g---agctgtt-gatgctctgtagtggtctttactgattgttg--ca-gagtgcacagc
acgtttactttgaaaaaattagagtgctcaaagcaggccg-ct--tgtgcttgaatag-t
ct-tgcatggaataatggaagaggacttc---ggt-tct-attttgtt-g-gttttc-gg
t-t------cc-ggagtaa-tgattaaaagagacag-acgtgggcatttgtatggtggtg
ttagaggtga---aattcttggatcgccgccagacaaac-tacagcgaaagcatttgcca
aggatgccttcattaatcaagaacgaaagtcagaggttcgaagacgatcagataccgt-c
ctagttctgaccataaactttaccgactaaca-atcaggggcgg-tta---gaat-ttat
tgaccctcctggctg-t-ccct-gggaaacc-tgaagtat--aggttctggggggaatat
ggt-cacaaggctgaaacttaaaggaattgacggaagggcaccaccaggagtggagcctg
cggcttaatttgactcaacacggggaaactcacccggcccggacactggaaggatggaca
gat--tgacagctctttcttgattcagtgggtggtggtgcatggccgttcttagttggtg
gagtgatttgtctggttaa--ttccgataacgaacgagactctgtcctgc-taaatag--
---taca--ttgatcctggatc---------g-ccgtca-------------aaagtgat
ctca-gtcaat-gct--gac-ttcttagagggatacg-cggta------ttta-aaccgc
acgaaa-tagagcaataacaggtctgtgatgccctta-gatgtccggggccgcac-----
----------------------------------gcgcg-ctacaatgacagtatcagag
agtatta-ccacctggtccgaaa-ggattgggaaatctt--ggcattattgtcacatcag
ggattgagacttgtaattatttctcatgaacgaggaattcccagtagatgcaagtcatca
gcttgcgtcgattacgtccctgccctttgtacacaccgcccgtcgctactaccgattgaa
tggtttagtgaggtcctcggatcgtgaccttcgc------agt----------gcaagct
gc-------attg-gttatgag-aaga-cgatcgaac-ttgatcatttagaggaag--t-
aaaagtcgtaacaaggtt-tccgtaggtgaacctgc-ag---------------------
------------------------------------------------------------
------------------------------------------------------------
------------------------------------------------------------
------------------------------------------------------------
------------------------------------------------------------
-----------
>KC529456_Gieysztoria_sp3
------------------------------------------------------------
-------------------cagtagtcat-atgcttgtctcaaagattaag-ccatgcat
gtataagatcacg-cc-c-ttga-atggcgaatctgcg-aatggctcattaaatcagcta
ttgtttcttggatctta-cact--tttacttgg--ataactgcagtaattctg-gagcta
ataca-tgcc--a--a-agtgcttcagtcgc-a----------agattggagc-gggttt
attag-atca--aaatca-ac-cggt--c-------tcctcgtgg-------g-ac-tg-
t-tgg------------------gctga-tg-attctggataac-ca-ac--ctgaccgt
atga-cc--ttgtgtcgacggcgtatc-cttcaagtgtctgacctatca-actgtcgatg
gtgagtgatttgctca-ccatggtgatcacgggtaacggggaatcagtgttcgattccgg
agagggag-ccttagaaacggctaccacatctaaggaaggcagcaggcgcgcaaattacc
cactctcaatt----cgaggaggtagtga-cgaaaaataacgatgatagactc-attatg
aggcctatcaattggaatgagtacaa-tttaaatcc-ttt-aacgaggatccattgg-ag
ggcaag-tctggtgccagcagccgcggtaattccagct-ccaatagcgtatattaaattt
gttgcagttaaaaagctcgtagttggatctcaggtg-tg-------agtcg-gcgg-tac
agtctttatg--tactg-t---------gactgtt-cgt-tctccgccttca--att---
-g---agctgtt-gatgctctgtagtggtcttcactgattgttg--ca-gagtgcacagc
acgtttactttgaaaaaattagagtgctcaaagcaggccg-tt--tgtgcttgaatag-t
ct-tgcatggaataatggaagaggacttc---ggt-tct-attttgtt-g-gttttc-gg
t-t------cc-gaagtaa-tgattaaaagagacag-acgtgggcatttgtatggtggtg
ttagaggtga---aattcttggatcgccgccagacaaac-tacagcgaaagcatttgcca
aggatgccttcattaatcaagaacgaaagtcagaggttcgaagacgatcagataccgt-c
ctagttctgaccataaactttaccgactaaca-atcaggggcgg-tta---gaat-ttat
tgaccctcctggctg-t-ccct-gggaaacc-tgaagtat--aggttctggggggaatat
ggt-cacaaggctgaaacttaaaggaattgacggaagggcaccaccaggagtggagcctg
cggcttaatttgactcaacacggggaaactcacccggcccggacactggaaggatggaca
gat--tgacagctctttcttgattcagtgggtggtggtgcatggccgttcttagttggtg
gagtgatttgtctggttaa--ttccgataacgaacgagactctgtcctgc-taaatag--
---tacg--ttgatcctggatc---------g-ccgtca-------------aaagtgat
ctca-gtcaac-gct--gac-ttcttagagggatacg-cggta------ttta-aaccgc
acgaaa-tagagcaataacaggtctgtgatgccctta-gatgtccggggccgcac-----
----------------------------------gcgcg-ctacaatgacagtatcagag
agtatta-acacctggtccgaaa-ggattgggaaatctt--agcattattgtcacatcag
ggattgagacttgtaattatttctcatgaacgaggaattcccagtagatgcaagtcatca
gcttgcgtcgattacgtccctgccctttgtacacaccgcccgtcgctactaccgattgaa
tggtttagtgaggtcctcggattgtgacctctgc------agt----------gaaagct
gc-------attg-gttatgag-aaga-cgatcgaac-ttgatcatttagaggaag--t-
aaaagtcgtaacaaggtt-tccgtaggtgaacc---------------------------
------------------------------------------------------------
------------------------------------------------------------
------------------------------------------------------------
------------------------------------------------------------
------------------------------------------------------------
-----------
>KC529455_Gieysztoria_sp2
------------------------------------------------------------
------------------ccagtagtcat-atgcttgtctcaaagattaag-ccatgcat
gtataagatcacg-tc-c-ttgt-atgacgaatctgcg-aatggctcattaaatcagcta
ttgtttcttggatctta-cact---ctacttgg--ataactgcagtaattctg-gagcta
ataca-tgcc--a--a-agtgcttcaatcgc-a----------agattggagc-gggttt
attag-atca--aaatca-ac-cggt--c-------tctt--cggg------g-ac-tg-
t-tgg------------------gctga-tg-actctggataac-ca-ac--ctgaccgt
atga-cca-tcgtgttgacggcgtatc-cttcaagtgtctgacctatca-actgtcgatg
gtgagtgatttgctca-ccatggtgataacgggtaacggggaatcagtgttcgattccgg
agagggag-ccttagaaacggctaccacatctaaggaaggcagcaggcgcgcaaattacc
cactctcaatt----cgaggaggtagtga-cgaaaaataacgatgatagactc-attatg
aggcctatcaattggaatgagtacaa-tttaaatcc-ttt-aacgaggaaccattgg-ag
ggcaag-tctggtgccagcagccgcggtaattccagct-ccaatagcgtatattaaattt
gttgcagttaaaaagctcgtagttggatctcaggtg-tg-------agtcg-gcgg-tac
agtctttacg--tactg-t---------tactggt-tga-tctccgccttca--ata---
-c---agttgtt-gatgctctgtagtggtctttactgactgttg--ct-gagtgcacagc
acgtttactttgaaaaaattagagtgctcaaagcaggccg-at--tgtgcttgaatag-t
ct-tgcatggaataatggaagaggacttc---ggt-tct-attttgtt-g-gttttc-gg
t-t------cc-gaagtaa-tgattaaaagagacag-acgtgggcatttgtatggtggtg
ttagaggtga---aattcttggatcgccgccagacaaac-tacagcgaaagcatttgcca
aggatgccttcattaatcaagaacgaaagtcagaggttcgaagacgatcagataccgt-c
ctagttctgaccataaactttaccgactaaca-atcaagggcgg-tta---gaat-atat
tgaccctcttggctg-t-ccct-gggaaacc-tgaagtat--aggttctggggggaatat
ggt-cacaaggctgaaacttaaaggaattgacggaagggcaccaccaggagtggagcctg
cggcttaatttgactcaacacggggaaactcacccggcccggacactgtgaggatggaca
gat--tgacagctctttcttgattcagtgggtggtggtgcatggccgttcttagttggtg
gagtgatttgtctggttaa--ttccgataacgaacgagactctgtcctgc-taaatag--
---tatg--ttgatcctggatc---------gccga----------------aaggtgat
ttca-gtcaat-act--gac-ttcttagagggatacg-cggta------ttta-aaccgc
acgaaa-tagagcaataacaggtctgtgatgccctta-gatgtccggggccgcac-----
----------------------------------gcgcg-ctacaatgacagtatcagag
agtatta-acacctggtccgaaa-ggattgggaaatctt--agcattattgtcacatcag
ggattgagatttgtaattatctctcatgaacgaggaattcccagtagatgcaagtcatca
gcttgcgtcgattacgtccctgccctttgtacacaccgcccgtcgctactaccgattgaa
tggtttagtgaggtcctcggattgtgaccgtagc------agt----------gcaagct
gct------tttg-gttgtgag-aaga-cgatcgaac-ttgatcatttagaggaag--t-
aaaagtcgtaacaaggtt-tccgtaggtgaacctgc-ag---------------------
------------------------------------------------------------
------------------------------------------------------------
------------------------------------------------------------
------------------------------------------------------------
------------------------------------------------------------
-----------
>KC529454_Gieysztoria_sp1_scissors
------------------------------------------------------------
----------------ctccagtagtcat-atgcttgtctcaaagattaag-ccatgcat
gtataagatcacg-cc-c-ttga-atggcgaatctgcg-aatggctcattaaatcagcta
ttgtttcttggatctta-cact--tttacttgg--ataactgcagtaattctg-gagcta
ataca-tgcc--a--a-agtgcttcagtcga-a----------agattggagc-gggttt
attag-atca--aaatca-ac-cggt--c-------tcctcgtgg-------g-ac-tg-
t-tgg------------------gctga-tg-attctggataac-ca-ac--ctgaccgt
atga-cc--ttgtgtcgacggcgtatc-cttcaagtgtctgacctatca-actgtcgatg
gtgagtgatttgctca-ccatggtgatcacgggtaacggggaatcagtgttcgattccgg
agagggag-ccttagaaacggctaccacatctaaggaaggcagcaggcgcgcaaattacc
cactctcaatt----cgaggaggtagtga-cgaaaaataacgatgatagactc-attatg
aggcctatcaattggaatgagtacaa-tttaaatcc-ttt-aacgaggaacaattgg-ag
ggcaag-tctggtgccagcagccgcggtaattccagct-ccaatagcgtatattaaattt
gttgcagttaaaaagctcgtagttggatctcaggtg-tg-------agtcg-gcgg-tac
agactttctg--ttctg-t---------gactgtt-cgt-gcttcgccttca--ata---
-t---agctgtt-gatgctctgtagtggtcttcattgattgttg--ca-gagtgcacagc
acgtttactttgaaaaaattagagtgctcaaagcaggccg-at--tgtgcttgaatag-t
ct-tgcatggaataatggaagaggacttc---ggt-tct-attttgtt-g-gttttc-gg
t-t------cc-gaagtaa-tgattaaaagagacag-acgtgggcatttgtatggtggtg
ttagaggtga---aattcttggatcgccgccagacaaac-tacagcgaaagcatttgcca
aggatgccttcattaatcaagaacgaaagtcagaggttcgaagacgatcagataccgt-c
ctagttctgaccataaactttaccgactaaca-atcaggggcgg-tta---gaat-ttat
tgaccctcctggctg-t-ccct-gggaaacc-tgaagtat--aggttctggggggaatat
ggt-cacaaggctgaaacttaaaggaattgacggaagggcaccaccaggagtggagcctg
cggcttaatttgactcaacacggggaaactcacccggcccggacactggaaggatggaca
gat--tgacagctctttcttgattcagtgggtggtggtgcatggccgttcttagttggtg
gagtgatttgtctggttaa--ttccgataacgaacgagactctgtcctgc-taaatag--
---tatg--ttgatcctggatt---------g-ccttta-------------aa-gtgat
ctta-gtcaac-act--gac-ttcttagagggatacg-cggta------ttta-aaccgc
acgaaa-tagagcaataacaggtctgtgatgccctta-gatgtccggggccgcac-----
----------------------------------gcgcg-ctacaatgacagtaacagag
agtatta-acacctagtccgaaa-ggattgggaaatctt--ggcattattgtcacatcag
ggattgagatttgtaattatctctcatgaacgaggaattcccagtagatgcaagtcatca
gcttgcgtcgattacgtccctgccctttgtacacaccgcccgtcgctactaccgattgaa
tggtttagtgaggtcctcggattgtgacctctgc------agt----------gaaagct
gc-------actg-gttatgag-aaga-cgatcgaac-ttgatcatttagaggaag--t-
aaaagtcgtaacaaggtt-tccgtaggtgaacctgc------------------------
------------------------------------------------------------
------------------------------------------------------------
------------------------------------------------------------
------------------------------------------------------------
------------------------------------------------------------
-----------
>KC529453_Microdalyellia_fusca
------------------------------------------------------------
--------------cctgccagtagtcat-atgcttgtctcaaagattaag-ccatgcat
gtatcagtacagg-cc-t-ttaa-atggctaaaccgcg-aatggctcattaaatcagcta
ttgtttcttagatctta-catt-tcatacttgg--ataactgcagtaattctg-gagcta
ataca-tgcc--a--c-tgtgtttcactcgc-a----------agagtggaat-gggttt
attag-atca--aaacta-ac-caca--c-------ttc-----------g-g-tg-tg-
t-tgg------------------gttga-tg-actctggataac-ca-ac--ctgaccgt
atgg-cc--ttgtgctgacggcgtatc-tttcaagtgtctgacctatca-actgtcgatg
gtatgtgatatgctta-ccatggtgataacgggtaacggggaatcagtgttcgattccgg
agagggag-ccttagaaacggctaccacatctaaggaaggcagcaggcgcgcaaattacc
cactctcagtt----cgaggaggtagtga-cgaaaaataacgatggtagactc-attacg
aggcctaccaattggaatgagtacaa-tttaaatcc-ttt-aacgaggaacaattgg-ag
ggcaag-tctggtgccagcagccgcggtaattccagct-ccaatagcgtatattaaaatt
gttgcagttaaaaagctcgtagttggatctcaggtg-tg-------agtcg-tcgg-tac
aatcttag----tattg-t---------tactgtt-cgt-tctccgcctt----ata---
-t---agctgtt-gatgctctgtagtggtctttactgattgtta--ca-gagtgcacggc
acgtttactttgaaaaaattagagtgctcaaagcaggcct--t--tgtgcttgaatag-t
ct-tgcatggaataatggaaaaggacttc---ggt-tct-attttgtt-g-gttttc-gg
t-t------cc-gaagtaa-tgattaaaagagacag-acgtgggcatttgtatggtggtg
ttagaggtga---aattcttggatcgccgccagacaaac-taccgcgaaagcatttgcca
aggatgccttcattaatcaagaacgaaagtcagaggttcgaagacgatcagataccgt-c
ctagttctgactataaactttaccgactaaca-atcaggagcgg-tta---gaat-ttat
tgaccctcctggctg-t-ccct-gggaaacc-tgaagtaa--aggttctggggggaatat
ggt-cacaaggctgaaacttaaaggaattgacggaagggcaccaccaggagtggagcctg
cggcttaatttgactcaacacggggaaactcacccggcccggacactggaaggatggaca
gat--tgacagctctttcttgattcagtgggtggtggtgcatggccgttcttagttggtg
gagtgatttgtctggttaa--ttccgataacgaacgagactctgtcctgc-taaatag--
---tacg--ctgttcttgggct---------catctg-------------------ggct
ttca-gacagt-gct--gac-ttcttagagggatacg-cggta------ttca-aaccgc
acgaaa-tagagcaataacaggtctgtgatgccctta-gatgtccggggccgcac-----
----------------------------------gcgcg-ctacaatgacagtatcagag
agtatta-ccacctggtccgaaa-ggattgggaaatctt--ggcaatattgtctcatcgg
ggattgagacttgtaattatttctcatgaacgaggaattcccagtagatgcaagtcatca
gcttgcgtcgattacgtccctgccctttgtacacaccgcccgtcgctactaccgattgaa
tggtttagtgaggtcctcggattgtggtctctgt------agt----------gcaaact
ac-------attg-actatgag-aaga-cgatcgaac-ttgatcatttagaggaag--t-
aaaagtcgtaacaaggtt-tccgtaggtgaacctg-------------------------
------------------------------------------------------------
------------------------------------------------------------
------------------------------------------------------------
------------------------------------------------------------
------------------------------------------------------------
-----------
>KC529452_Microdalyellia_armigera
------------------------------------------------------------
---------------ctgccagtagtcat-atgcttgtctcaaagattaag-ccatgcat
gtatcagtacagg-cc-t-ttat-atggctaaaccgcg-aatggctcattaaatcagcta
ttgtttcttagatctta-catt-tcatacttgg--ataactgcagtaattctg-gagcta
ataca-tgcc--a--c-tgtgtttcactcgc-a----------agagtggaat-gggttt
attag-atca--aaacta-ac-caca--c-------ttc-----------g-g-tg-tg-
t-tgg------------------gttga-tg-actctggataac-ca-ac--ctgaccgt
atgg-cc--ttgtgctgacggcgtatc-tttcaagtgtctgacctatca-actgtcgatg
gtatgtgatatgctta-ccatggtgataacgggtaacggggaatcagtgttcgattccgg
agagggag-ccttagaaacggctaccacatctaaggaaggcagcaggcgcgcaaattacc
cactctcagtt----cgaggaggtagtga-cgaaaaataacgatggtagactc-attacg
aggcctaccaattggaatgagtacaa-tttaaatcc-ttt-aacgaggaacaattgg-ag
ggcaag-tctggtgccagcagccgcggtaattccagct-ccaatagcgtatattaaaatt
gttgcagttaaaaagctcgtagttggatctcaggtg-tg-------agtcg-tcgg-tac
aatcttag----tattg-t---------tactgtt-cgt-tctccgcctt----ata---
-t---agctgtt-gatgctctgtagtggtctttactgattgtta--ca-gagtgcacggc
acgtttactttgaaaaaattagagtgctcaaagcaggcct--t--tgtgcttgaatag-t
ct-tgcatggaataatggaaaaggacttc---ggt-tct-attttgtt-g-gttttc-gg
t-t------cc-gaagtaa-tgattaaaagagacag-acgtgggcatttgtatggtggtg
ttagaggtga---aattcttggatcgccgccagacaaac-taccgcgaaagcatttgcca
aggatgccttcattaatcaagaacgaaagtcagaggttcgaagacgatcagataccgt-c
ctagttctgactataaactttaccgactaaca-atcaggagcgg-tta---gaat-ttat
tgaccctcctggctg-t-ccct-gggaaacc-tgaagtaa--aggttctggggggaatat
ggt-cacaaggctgaaacttaaaggaattgacggaagggcaccaccaggagtggagcctg
cggcttaatttgactcaacacggggaaactcacccggcccggacactggaaggatggaca
gat--tgacagctctttcttgattcagtgggtggtggtgcatggccgttcttagttggtg
gagtgatttgtctggttaa--ttccgataacgaacgagactctgtcctgc-taaatag--
---tacg--ctgttcttgggct---------catctg-------------------ggct
ttca-gacagt-gct--gac-ttcttagagggatacg-cggta------ttca-aaccgc
acgaaa-tagagcaataacaggtctgtgatgccctta-gatgtccggggccgcac-----
----------------------------------gcgcg-ctacaatgacagtatcagag
agtatta-ccacctggtccgaaa-ggattgggaaatctt--ggcaatattgtctcatcgg
ggattgagacttgtaattatttctcatgaacgaggaattcccagtagatgcaagtcatca
gcttgcgtcgattacgtccctgccctttgtacacaccgcccgtcgctactaccgattgaa
tggtttagtgaggtcctcggattgtggtctctgt------agt----------gcaaact
ac-------attg-actgtgag-aaga-cgatcgaac-ttgatcatttagaggaag--t-
aaaagtcgtaacaaggtt-tccgtaggtgaacctg-------------------------
------------------------------------------------------------
------------------------------------------------------------
------------------------------------------------------------
------------------------------------------------------------
------------------------------------------------------------
-----------
>KC529451_Microdalyellia_armigera
------------------------------------------------------------
tacctg-gtt-gatcctgccagtagtcat-atgcttgtctcaaagattaag-ccatgcat
gtatcagtacagg-cc-t-taaa-atggctaaaccgcg-aatggctcattaaatcagcta
ttgtttcttagatctta-catt-tgatacttgg--ataactgcagtaattctg-gagcta
ataca-tgcc--a--c-tgtgtttcactcgc-a----------agagtggaat-gggttt
attag-atca--aaacta-ac-caca--c-------ttc-----------g-g-tg-tg-
t-tgg------------------gttga-tg-actctggataac-ca-ac--ctgaccgt
atgg-cc--ttgtgctgacggcgtatc-tttcaagtgtctgacctatca-actgtcgatg
gtatgtgatatgctta-ccatggtgataacgggtaacggggaatcagtgttcgattccgg
agagggag-ccttagaaacggctaccacatctaaggaaggcagcaggcgcgcaaattacc
cactctcagtt----cgaggaggtagtga-cgaaaaataacgatggtagactc-attacg
aggcctaccaattggaatgagtacaa-tttaaatcc-ttt-aacgaggaacaattgg-ag
ggcaag-tctggtgccagcagccgcggtaattccagct-ccaatagcgtatattaaaatt
gttgcagttaaaaagctcgtagttggatctcaggtg-tg-------agtcg-tcgg-tac
aatcttag----tattg-t---------tactgtt-cgt-tctccgcctt----ata---
-t---agctgtt-gatgctctgtagtggtctttactgattgtta--ca-gagtgcacggc
acgtttactttgaaaaaattagagtgctcaaagcaggcct--t--tgtgcttgaatag-t
ct-tgcatggaataatggaaaaggacttc---ggt-tct-attttgtt-g-gttttc-gg
t-t------cc-gaagtaa-tgattaaaagagacag-acgtgggcatttgtatggtggtg
ttagaggtga---aattcttggatcgccgccagacaaac-taccgcgaaagcatttgcca
aggatgccttcattaatcaagaacgaaagtcagaggttcgaagacgatcagataccgt-c
ctagttctgactataaactttaccgactaaca-atcaggagcgg-tta---gaat-ttat
tgaccctcctggctg-t-ccct-gggaaacc-tgaagtaa--aggttctggggggaatat
ggt-cacaaggctgaaacttaaaggaattgacggaagggcaccaccaggagtggagcctg
cggcttaatttgactcaacacggggaaactcacccggcccggacactggaaggatggaca
gat--tgacagctctttcttgattcagtgggtggtggtgcatggccgttcttagttggtg
gagtgatttgtctggttaa--ttccgataacgaacgagactctgtcctgc-taaatag--
---tacg--ctgttcttgggct---------catctg-------------------ggct
ttca-gacagt-gct--gac-ttcttagagggatacg-cggta------ttca-aaccgc
acgaaa-tagagcaataacaggtctgtgatgccctta-gatgtccggggccgcac-----
----------------------------------gcgcg-ctacaatgacagtatcagag
agtatta-ccacctggtccgaaa-ggattgggaaatctt--ggcaatattgtctcatcgg
ggattgagacttgtaattatttctcatgaacgaggaattcccagtagatgcaagtcatca
gcttgcgtcgattacgtccctgccctttgtacacaccgcccgtcgctactaccgattgaa
tggtttagtgaggtcctcggattgtggtctctgt------agt----------gcaaact
ac-------attg-actgtgag-aaga-cgatcgaac-ttgatcatttagaggaag--t-
aaaagtcgtaacaaggtt-tccgtaggtgaacctgc-ag-atggatca------------
------------------------------------------------------------
------------------------------------------------------------
------------------------------------------------------------
------------------------------------------------------------
------------------------------------------------------------
-----------
>KC529450_Microdalyellia_brevispina
------------------------------------------------------------
---ctg-gtt-gatcctgccagtagtcat-atgcttgtctcaaagattaag-ccatgcat
gtatcagtacagg-cc-t-ttaa-atggctaaaccgcg-aatggctcattaaatcagcta
ttgtttcttagatctta-catt-tcatacttgg--ataactgcagtaattctg-gagcta
ataca-tgcc--a--c-tgtgtttcactcgc-a----------agagtggaat-gggttt
attag-atca--aaacta-ac-caca--c-------ttc-----------g-g-tg-tg-
t-tgg------------------gttga-tg-actctggataac-ca-ac--ctgaccgt
atgg-cc--ttgtgctgacggcgtatc-tttcaagtgtctgacctatca-actgtcgatg
gtatgtgatatgctta-ccatggtgataacgggtaacggggaatcagtgttcgattccgg
agagggag-ccttagaaacggctaccacatctaaggaaggcagcaggcgcgcaaattacc
cactctcagtt----cgaggaggtagtga-cgaaaaataacgatggtagactc-attacg
aggcctaccaattggaatgagtacaa-tttaaatcc-ttt-aacgaggaacaattgg-ag
ggcaag-tctggtgccagcagccgcggtaattccagct-ccaatagcgtatattaaaatt
gttgcagttaaaaagctcgtagttggatctcaggtg-tg-------agtcg-tcgg-tac
aatcttag----tattg-t---------tactgtt-cgt-tctccgcctt----ata---
-t---agctgtt-gatgctctgtagtggtctttactgattgtta--ca-gagtgcacggc
acgtttactttgaaaaaattagagtgctcaaagcaggcct--t--tgtgcttgaatag-t
ct-tgcatggaataatggaaaaggacttc---ggt-tct-attttgtt-g-gttttc-gg
t-t------cc-gaagtaa-tgattaaaagagacag-acgtgggcatttgtatggtggtg
ttagaggtga---aattcttggatcgccgccagacaaac-taccgcgaaagcatttgcca
aggatgccttcattaatcaagaacgaaagtcagaggttcgaagacgatcagataccgt-c
ctagttctgactataaactttaccgactaaca-atcaggagcgg-tta---gaat-ttat
tgaccctcctggctg-t-ccct-gggaaacc-tgaagtaa--aggttctggggggaatat
ggt-cacaaggctgaaacttaaaggaattgacggaagggcaccaccaggagtggagcctg
cggcttaatttgactcaacacggggaaactcacccggcccggacactggaaggatggaca
gat--tgacagctctttcttgattcagtgggtggtggtgcatggccgttcttagttggtg
gagtgatttgtctggttaa--ttccgataacgaacgagactctgtcctgc-taaatag--
---tacg--ctgttcttgggct---------catctg-------------------ggct
ttca-gacagt-gct--gac-ttcttagagggattcg-cggta------ttca-aaccgc
acgaaa-tagagcaataacaggtctgtgatgccctta-gatgtccggggccgcac-----
----------------------------------gcgcg-ctacaatgacagtatcagag
agtatta-ccacctggtccgaaa-ggattgggaaatctt--ggcaatattgtctcatcgg
ggattgagacttgtaattatttctcatgaacgaggaattcccagtagatgcaagtcatca
gcttgcgtcgattacgtccctgccctttgtacacaccgcccgtcgctactaccgattgaa
tggtttagtgaggtcctcggattgtggtctctgt------agt----------gcaaact
ac-------attg-actgtaag-aaga-cgatcgaac-ttgatcatttagaggaag--t-
aaaagtcgtaacaaggtt-tccgtaggtgaacctgc-ag-atgg----------------
------------------------------------------------------------
------------------------------------------------------------
------------------------------------------------------------
------------------------------------------------------------
------------------------------------------------------------
-----------
>KC529449_Microdalyellia_nanella
------------------------------------------------------------
----------------tgccagtagtcat-atgcttgtctcaaagattaag-ccatgcat
gtatcagtacagg-cc-t-ttaa-atggctaaaccgcg-aatggctcattaaatcagcta
ttgtttcttagatctta-catt-tcatacttgg--ataactgcagtaattctg-gagcta
ataca-tgcc--a--c-tatgtttcactcgc-a----------agagtggaat-gggttt
attag-atca--aaacta-ac-caca--c-------tcc-----------g-g-tg-tg-
t-tgg------------------gttga-tg-actctggataac-ca-ac--ctgaccgt
atgg-cc--ttgtgctgacggcgtatc-tttcaagtgtctgacctatca-actgtcgatg
gtatgtgatatgctta-ccatggtgataacgggtaacggggaatcagtgttcgattccgg
agagggag-ccttagaaacggctaccacatctaaggaaggcagcaggcgcgcaaattacc
cactctcagtt----cgaggaggtagtga-cgaaaaataacgatggtagactc-attacg
aggcctaccaattggaatgagtacaa-tttaaatcc-ttt-aacgaggaacaattgg-ag
ggcaag-tctggtgccagcagccgcggtaattccagct-ccaatagcgtatattaaaatt
gttgcagttaaaaagctcgtagttggatctcaggtg-tg-------agtcg-tcgg-tac
aatcttag----tattg-t---------tactgtt-cgt-tctccgcctt----ata---
-t---agctgtt-gatgctctgtagtggtctttactgattgtta--ca-gagtgcacggc
acgtttactttgaaaaaattagagtgctcaaagcaggcct--t--tgtgcttgaatag-t
ct-tgcatggaataatggaaaaggacttc---ggt-tct-attttgtt-g-gttttc-gg
t-t------cc-gaagtaa-tgattaaaagagacag-acgtgggcatttgtatggtggtg
ttagaggtga---aattcttggatcgccgccagacaaac-taccgcgaaagcatttgcca
aggatgccttcattaatcaagaacgaaagtcagaggttcgaagacgatcagataccgt-c
ctagttctgactataaactttaccgactaaca-atcaggagcgg-tta---gaat-ttat
tgaccctcctggctg-t-ccct-gggaaacc-tgaagtaa--aggttctggggggaatat
ggt-cacaaggctgaaacttaaaggaattgacggaagggcaccaccaggagtggagcctg
cggcttaatttgactcaacacggggaaactcacccggcccggacactggaaggatggaca
gat--tgacagctctttcttgattcagtgggtggtggtgcatggccgttcttagttggtg
gagtgatttgtctggttaa--ttccgataacgaacgagactctgtcctgc-taaatag--
---tacg--ctgttcttgggct---------catctg-------------------ggct
ttca-gacagt-gct--gac-ttcttagagggatacg-cggta------ttca-aaccgc
acgaaa-tagagcaataacaggtctgtgatgccctta-gatgtccggggccgcac-----
----------------------------------gcgcg-ctacaatgacagtatcagag
agtatta-ccacctggtccgaaa-ggattgggaaatctt--ggcaatattgtctcatcgg
ggattgagacttgtaattatttctcatgaacgaggaattcccagtagatgcaagtcatca
gcttgcgtcgattacgtccctgccctttgtacacaccgcccgtcgctactaccgattgaa
tggtttagtgaggtcctcggattgtggtctctgt------agt----------gcaaact
ac-------attg-actgtaag-aaga-cgatcgaac-ttgatcatttagaggaag--t-
aaaagtcgtaacaaggtt-tccgtaggtgaacctgc-ag-atggat--------------
------------------------------------------------------------
------------------------------------------------------------
------------------------------------------------------------
------------------------------------------------------------
------------------------------------------------------------
-----------
>KC529447_Microdalyellia_fairchildi
------------------------------------------------------------
--------------cctgccagtagtcat-atgcttgtctcaaagattaag-ccatgcat
gtatcagtacagg-cc-t-ttaa-atggctaaaccgcg-aatggctcattaaatcagcta
ttgtttcttagatctta-catt-tcatacttgg--ataactgcagtaattctg-gagcta
ataca-tgcc--a--c-tgtgtttcactcgc-a----------agagtggaat-gggttt
attag-atca--aaacta-ac-caca--c-------ttc-----------g-g-tg-tg-
t-tgg------------------gttga-tg-actctggataac-ca-ac--ctgaccgt
atgg-cc--ttgtgctgacggcgtatc-tttcaagtgtctgacctatca-actgtcgatg
gtatgtgatatgctta-ccatggtgataacgggtaacggggaatcagtgttcgattccgg
agagggag-ccttagaaacggctaccacatctaaggaaggcagcaggcgcgcaaattacc
cactctcagtt----cgaggaggtagtga-cgaaaaataacgatggtagactc-attacg
aggcctaccaattggaatgagtacaa-tttaaatcc-ttt-aacgaggaacaattgg-ag
ggcaag-tctggtgccagcagccgcggtaattccagct-ccaatagcgtatattaaaatt
gttgcagttaaaaagctcgtagttggatctcaggtg-tg-------agtcg-tcgg-tac
aatcttag----tattg-t---------tactgtt-cgt-tctccgcctt----ata---
-t---agctgtt-gatgctctgtagtggtctttactgattgtta--ca-gagtgcacggc
acgtttactttgaaaaaattagagtgctcaaagcaggcct--t--tgtgcttgaatag-t
ct-tgcatggaataatggaaaaggacttc---ggt-tct-attttgtt-g-gttttc-gg
t-t------cc-gaagtaa-tgattaaaagagacag-acgtgggcatttgtatggtggtg
ttagaggtga---aattcttggatcgccgccagacaaac-taccgcgaaagcatttgcca
aggatgccttcattaatcaagaacgaaagtcagaggttcgaagacgatcagataccgt-c
ctagttctgactataaactttaccgactaaca-atcaggagcgg-tta---gaat-ttat
tgaccctcctggctg-t-ccct-gggaaacc-tgaagtaa--aggttctggggggaatat
ggt-cacaaggctgaaacttaaaggaattgacggaagggcaccaccaggagtggagcctg
cggcttaatttgactcaacacggggaaactcacccggcccggacactggaaggatggaca
gat--tgacagctctttcttgattcagtgggtggtggtgcatggccgttcttagttggtg
gagtgatttgtctggttaa--ttccgataacgaacgagactctgtcctgc-taaatag--
---tacg--ctgttcttgggtt---------catctg-------------------gact
ttca-gacagt-gct--gac-ttcttagagggatacg-cggta------ttca-aaccgc
acgaaa-tagagcaataacaggtctgtgatgccctta-gatgtccggggccgcac-----
----------------------------------gcgcg-ctacaatgacagtatcagag
agtatta-ccacctggtccgaaa-ggattgggaaatctt--ggcaatattgtctcatcgg
ggattgagacttgtaattatttctcatgaacgaggaattcccagtagatgcaagtcatca
gcttgcgtcgattacgtccctgccctttgtacacaccgcccgtcgctactaccgattgaa
tggtttagtgaggtcctcggattgtggtctctgt------agt----------gcaaact
ac-------attg-actgtaag-aaga-cgatcgaac-ttgatcatttagaggaag--t-
aaaagtcgtaacaaggtt-tccgtaggtgaacctg-------------------------
------------------------------------------------------------
------------------------------------------------------------
------------------------------------------------------------
------------------------------------------------------------
------------------------------------------------------------
-----------
>KC529448_Microdalyellia_rossi
------------------------------------------------------------
------------------ccagtagtcat-atgcttgtctcaaagattaag-ccatgcat
gtatcagtacagg-cc-t-ttaa-atggctaaaccgcg-aatggctcattaaatcagcta
ttgtttcttagatctta-catt-tgatacttgg--ataactgcagtaattctg-gagcta
ataca-tgcc--a--c-tgtgtttcactcgc-a----------agagtggaat-gggttt
attag-atca--aaacta-ac-caca--c-------ttc-----------g-g-tg-tg-
t-tgg------------------gttga-tg-actctggataac-ca-ac--ctgaccgt
atgg-cc--ttgtgctgacggcgtatc-tttcaagtgtctgacctatca-actgtcgatg
gtatgtgatatgctta-ccatggtgataacgggtaacggggaatcagtgttcgattccgg
agagggag-ccttagaaacggctaccacatctaaggaaggcagcaggcgcgcaaattacc
cactctcagtt----cgaggaggtagtga-cgaaaaataacgatggtagactc-attacg
aggcctaccaattggaatgagtacaa-tttaaatcc-ttt-aacgaggaacaattgg-ag
ggcaag-tctggtgccagcagccgcggtaattccagct-ccaatagcgtatattaaaatt
gttgcagttaaaaagctcgtagttggatctcaggtg-tg-------agtcg-tcgg-tac
aatcttag----tattg-t---------tactgtt-cgt-tctccgcctt----ata---
-t---agctgtt-gatgctctgtagtggtctttactgattgtta--ca-gagtgcacggc
acgtttactttgaaaaaattagagtgctcaaagcaggcct--t--tgtgcttgaatag-t
ct-tgcatggaataatggaaaaggacttc---ggt-tct-attttgtt-g-gttttc-gg
t-t------cc-gaagtaa-tgattaaaagagacag-acgtgggcatttgtatggtggtg
ttagaggtga---aattcttggatcgccgccagacaaac-taccgcgaaagcatttgcca
aggatgccttcattaatcaagaacgaaagtcagaggttcgaagacgatcagataccgt-c
ctagttctgactataaactttaccgactaaca-atcaggagcgg-tta---gaat-ttat
tgaccctcctggctg-t-ccct-gggaaacc-tgaagtaa--aggttctggggggaatat
ggt-cacaaggctgaaacttaaaggaattgacggaagggcaccaccaggagtggagcctg
cggcttaatttgactcaacacggggaaactcacccggcccggacactggaaggatggaca
gat--tgacagctctttcttgattcagtgggtggtggtgcatggccgttcttagttggtg
gagtgatttgtctggttaa--ttccgataacgaacgagactctgtcctgc-taaatag--
---tacg--ctgttcttgggct---------catctg-------------------ggct
ttca-gacagt-gct--gac-ttcttagagggatacg-cggta------ttca-aaccgc
acgaaa-tagagcaataacaggtctgtgatgccctta-gatgtccggggccgcac-----
----------------------------------gcgcg-ctacaatgacagtatcagag
agtatta-ccacctggtccgaaa-ggattgggaaatctt--ggcaatattgtctcatcgg
ggattgagacttgtaattatttctcatgaacgaggaattcccagtagatgcaagtcatca
gcttgcgtcgattacgtccctgccctttgtacacaccgcccgtcgctactaccgattgaa
tggtttagtgaggtcctcggattgtggtctctgt------agt----------gcaaact
ac-------attg-actgtaag-aaga-cgatcgaac-ttgatcatttagaggaag--t-
aaaagtcgtaacaaggtt-tccgtaggtgaacctgc------------------------
------------------------------------------------------------
------------------------------------------------------------
------------------------------------------------------------
------------------------------------------------------------
------------------------------------------------------------
-----------
>KC529446_Microdalyellia_picta
------------------------------------------------------------
taactg-gtt-gatcctgccagtagtcat-atgcttgtctcaaagattaag-ccatgcat
gtatcagtacagg-cc-t-ttaa-atggctaaaccgcg-aatggctcattaaatcagcta
ttgtttcttagatctta-catt-tgatacttgg--ataactgcagtaattctg-gagcta
ataca-tgcc--a--c-tgtgtttcactcgc-a----------agagtggaat-gggttt
attag-atca--aaacta-ac-caca--c-------ttc-----------g-g-tg-tg-
t-tgg------------------gttga-tg-actctggataac-ca-ac--ctgaccgt
atgg-cc--ttgtgctgacggcgtatc-tttcaagtgtctgacctatca-actgtcgatg
gtatgtgatatgctta-ccatggtgataacgggtaacggggaatcagtgttcgattccgg
agagggag-ccttagaaacggctaccacatctaaggaaggcagcaggcgcgcaaattacc
cactctcagtt----cgaggaggtagtga-cgaaaaataacgatggtagactc-attacg
aggcctaccaattggaatgagtacaa-tttaaatcc-ttt-aacgaggaacaattgg-ag
ggcaag-tctggtgccagcagccgcggtaattccagct-ccaatagcgtatattaaaatt
gttgcagttaaaaagctcgtagttggatctcaggtg-tg-------agtcg-tcgg-tac
aatcttag----tattg-t---------tactgtt-cgt-tctccgcctt----ata---
-t---agctgtt-gatgctctgtagtggtctttactgattgtta--ca-gagtgcacggc
acgtttactttgaaaaaattagagtgctcaaagcaggcct--t--tgtgcttgaatag-t
ct-tgcatggaataatggaaaaggacttc---ggt-tct-attttgtt-g-gttttc-gg
t-t------cc-gaagtaa-tgattaaaagagacag-acgtgggcatttgtatggtggtg
ttagaggtga---aattcttggatcgccgccagacaaac-taccgcgaaagcatttgcca
aggatgccttcattaatcaagaacgaaagtcagaggttcgaagacgatcagataccgt-c
ctagttctgactataaactttaccgactaaca-atcaggagcgg-tta---gaat-ttat
tgaccctcctggctg-t-ccct-gggaaacc-tgaagtaa--aggttctggggggaatat
ggt-cacaaggctgaaacttaaaggaattgacggaagggcaccaccaggagtggagcctg
cggcttaatttgactcaacacggggaaactcacccggcccggacactggaaggatggaca
gat--tgacagctctttcttgattcagtgggtggtggtgcatggccgttcttagttggtg
gagtgatttgtctggttaa--ttccgataacgaacgagactctgtcctgc-taaatag--
---tacg--ctgttcttgggtt---------cattag-------------------gact
ttca-gacagt-gct--gac-ttcttagagggatacg-cggta------ttca-aaccgc
acgaaa-tagagcaataacaggtctgtgatgccctta-gatgtccggggccgcac-----
----------------------------------gcgcg-ctacaatgacagtatcagag
agtatta-ccacctggtccgaaa-ggattgggaaatctt--ggcaatattgtctcatcgg
ggattgagacttgtaattatttctcatgaacgaggaattcccagtagatgcaagtcatca
gcttgcgtcgattacgtccctgccctttgtacacaccgcccgtcgctactaccgattgaa
tggtttagtgaggtcctcggattgtggtctctgt------agt----------gcaaact
ac-------attg-actgtaag-aaga-cgatcgaac-ttgatcatttagaggaag--t-
aaaagtcgtaacaaggtt-tccgtaggtgaacctgc-ag-atggat--------------
------------------------------------------------------------
------------------------------------------------------------
------------------------------------------------------------
------------------------------------------------------------
------------------------------------------------------------
-----------
>KC529445_Microdalyellia_kupelwieseri
------------------------------------------------------------
-----------gatcctgccagtagtcat-atgcttgtctcaaagattaag-ccatgcat
gtatcagtacagg-cc-t-taaa-atggctaaaccgcg-aatggctcattaaatcagcta
ttgtttcttagatctta-catt-tcatacttgg--ataactgcagtaattctg-gagcta
ataca-tgcc--a--c-tgtgtttcactcgc-a----------agagtggaat-gggttt
attag-atca--aaacta-ac-caca--c-------ttc-----------g-g-tg-tg-
t-tgg------------------gttga-tg-actctggataac-ca-ac--ctgaccgt
atgg-cc--ttgtgctgacggcgtatc-tttcaagtgtctgacctatca-actgtcgatg
gtatgtgatatgctta-ccatggtgataacgggtaacggggaatcagtgttcgattccgg
agagggag-ccttagaaacggctaccacatctaaggaaggcagcaggcgcgcaaattacc
cactctcagtt----cgaggaggtagtga-cgaaaaataacgatggtagactc-attacg
aggcctaccaattggaatgagtacaa-tttaaatcc-ttt-aacgaggaacaattgg-ag
ggcaag-tctggtgccagcagccgcggtaattccagct-ccaatagcgtatattaaaatt
gttgcagttaaaaagctcgtagttggatctcaggtg-tg-------agtcg-tcgg-tac
aatcttag----tattg-t---------tactgtt-cgt-tctccgcctt----ata---
-t---agctgtt-gatgctctgtagtggtctttactgattgtta--ca-gagtgcacggc
acgtttactttgaaaaaattagagtgctcaaagcaggcct--t--tgtgcttgaatag-t
ct-tgcatggaataatggaaaaggacttc---ggt-tct-attttgtt-g-gttttc-gg
t-t------cc-gaagtaa-tgattaaaagagacag-acgtgggcatttgtatggtggtg
ttagaggtga---aattcttggatcgccgccagacaaac-taccgcgaaagcatttgcca
aggatgccttcattaatcaagaacgaaagtcagaggttcgaagacgatcagataccgt-c
ctagttctgactataaactttaccgactaaca-atcaggagcgg-tta---gaat-ttat
tgaccctcctggctg-t-ccct-gggaaacc-tgaagtaa--aggttctggggggaatat
ggt-cacaaggctgaaacttaaaggaattgacggaagggcaccaccaggagtggagcctg
cggcttaatttgactcaacacggggaaactcacccggcccggacactggaaggatggaca
gat--tgacagctctttcttgattcagtgggtggtggtgcatggccgttcttagttggtg
gagtgatttgtctggttaa--ttccgataacgaacgagactctgtcctgc-taaatag--
---tacg--ctgttcttgggct---------catctg-------------------ggct
ttca-gacagt-gct--gac-ttcttagagggatacg-cggta------ttca-aaccgc
acgaaa-tagagcaataacaggtctgtgatgccctta-gatgtccggggccgcac-----
----------------------------------gcgcg-ctacaatgacagtatcagag
agtatta-ccacctggtccgaaa-ggattgggaaatctt--ggcaatattgtctcatcgg
ggattgagacttgtaattatttctcatgaacgaggaattcccagtagatgcaagtcatca
gcttgcgtcgattacgtccctgccctttgtacacaccgcccgtcgctactaccgattgaa
tggtttagtgaggtcctcggattgtggtctctgt------agt----------gcaaact
ac-------attg-actgtaag-aaga-cgatcgaac-ttgatcatttagaggaag--t-
aaaagtcgtaacaaggtt-tccgtaggtgaacctgc-ag-atggatca------------
------------------------------------------------------------
------------------------------------------------------------
------------------------------------------------------------
------------------------------------------------------------
------------------------------------------------------------
-----------
>KC529444_Dalyellia_viridis
------------------------------------------------------------
------------------ccagtagtcat-atgcttgtctcaaagattaag-ccatgcat
gtatcagtacagg-tc-t-ttca--tgactaaaccgcg-aatggctcattaaatcagcta
ttgtttcttagatctta-c-ca-cattacttgg--ataactgcagtaattctg-gagcta
ataca-tgcc--a--a-tgtgcttcagtcgc-a----------agattggagc-gggttt
attag-atca--aaatca-ac-cgca--t-------ttc-----------g-g-tg-cg-
t-tgg------------------gctga-tg-attctggataac-ca-ac--ctgaccgt
atgg-cc--ttgtgccgacggcgtatc-tttcaagtgtctgacctatca-actgtcgatg
gtgagtgatatgctta-ccatggtgatcacgggtaacggggaatcagtgttcgattccgg
agagggag-ccttagaaacggctaccacatctaaggaaggcagcaggcgcgcaaattacc
cactctcagtt----cgaggaggtagtga-cgaaaaataacgatggtagactc-attatg
aggcctaccaattggaatgagtacaa-tttaaatcc-ttt-aacgaggagcaattgg-ag
ggcaag-tctggtgccagcagccgcggtaattccagct-ccaatagcgtatattaaaatt
gttgcagttaaaaagctcgtagttggatctcaggtg-tg-------agtcg-tcgg-tac
aatcttag----tattg-t---------gactgta-cgt-tctccgccttc---tta---
-c---agctgtt-gatgctctgtagtggtctttactgactgttg--ca-gagtgcacggc
acgtttactttgaaaaaattagagtgctcaaagcaggcct--t--tgtgcctgaatag-t
ct-tgcatggaataatggaagaggacttc---ggt-tct-attttgtt-g-gttttc-gg
t-t------cc-gaagtaa-tgattaaaagagacag-acgagggcatttgtatggtggtg
ttagaggtga---aattcttggatcgccgccagacaaac-tactgcgaaagcatttgcca
aggatgccttcattaatcaagaacgaaagtcagaggttcgaagacgatcagataccgt-c
ctagttctgactataaactttaccgactaaca-atcaggggcgg-tta---gaat-ttat
tgaccctcctggctg-t-ccct-gggaaacc-tgaagtat--aggttctggggggaatat
ggt-cacaaggctgaaacttaaaggaattgacggaagggcaccaccaggagtggagcctg
cggcttaatttgactcaacacggggaaactcacccggcccggacactggaaggatggaca
gat--tgacagctctttcttgattcagtgggtggtggtgcatggccgttcttagttggtg
gagtgatttgtctggttaa--ttccgataacgaacgagactctgtcctgc-taaatag--
---tacg--ctgatctttggct---------cttcaat------------------gggc
tcca-gtcagt-gct--gac-ttcttagagggatacg-cggta------ttca-aaccgc
acgaaa-tagagcaataacaggtctgtgatgccctta-gatgtccggggccgcac-----
----------------------------------gcgcg-ctacaatgacagtatcaaag
agtatta-ccacctggtccgaaa-ggattgggaaatctt--ggcaatattgtcacatcag
ggattgagacttgtaattatttctcatgaacgaggaattcccagtagatgcaagtcatca
gcttgcgtcgattacgtccctgccctttgtacacaccgcccgtcgctactaccgattgaa
tggtttagtgaggtcctcggattgagatctctgc------agt----------gaaagct
gc-------attg-atcctgag-aaga-cgatcgaac-ttgatcatttagaggaag--t-
aaaagtcgtaacaaggtt-tccgtaggtgaacctgc-agaatggatc-------------
------------------------------------------------------------
------------------------------------------------------------
------------------------------------------------------------
------------------------------------------------------------
------------------------------------------------------------
-----------
>KC529443_Dalyellia_tatrica
------------------------------------------------------------
--------------cctgccagtagtcat-atgcttgtctcaaagattaag-ccatgcat
gtatcagtacagg-cc-t-tttatttggctaaaccgcg-aatggctcattaaatcagcta
ttgtttcttagatctta-c-ca-cattacttgg--ataactgcagtaattctg-gagcta
ataca-tgcc--a--a-tgtgcttcagtcgc-a----------agattggagc-gggttt
attag-atca--aaatca-ac-cgca--t-------ttc-----------g-g-tg-cg-
t-tgg------------------gctga-tg-attctggataac-ca-tc--ctgaccgt
atgg-cc--ttgtgccgacggcgtatc-tttcaagtgtctgacctatca-actgtcgatg
gtgagtgatatgctta-ccatggtgatcacgggtaacggggaatcagtgttcgattccgg
agagggag-ccttagaaacggctaccacatctaaggaaggcagcaggcgcgcaaattacc
cactctcagtt----cgaggaggtagtga-cgaaaaataacgatggtagactc-attatg
aggcctaccaattggaatgagtacaa-tttaaatcc-ttt-aacgaggagcaattgg-ag
ggcaag-tctggtgccagcagccgcggtaattccagct-ccaatagcgtatattaaaatt
gttgcagttaaaaagctcgtagttggatctcaggtg-tg-------agtcg-tcgg-tac
aatcttag----tattg-t---------gactgta-cgt-tctccgccttc---tta---
-t---agctgtt-gatgctctgtagtggtctttactgactgttg--ca-gggtgcacggc
acgtttactttgaaaaaattagagtgctcaaagcaggcct--t--tgtgcctgaatag-t
ct-tgcatggaataatggaagaggacttc---ggt-tct-attttgtt-g-gttttc-gg
t-t------cc-gaagtaa-tgattaaaagagacag-acgagggcatttgtatggtggtg
ttagaggtga---aattcttggatcgccgccagacaaac-tactgcgaaagcatttgcca
aggatgccttcattaatcaagaacgaaagtcagaggttcgaagacgatcagataccgt-c
ctagttctgactataaactttaccgactaaca-atcaggggcgg-tta---gaat-ttat
tgaccctcctggctg-t-ccct-gggaaacc-tgaagtat--aggttctggggggaatat
ggt-cacaaggctgaaacttaaaggaattgacggaagggcaccaccaggagtggagcctg
cggcttaatttgactcaacacggggaaactcacccggcccggacactggaaggatggaca
gat--tgacagctctttcttgattcagtgggtggtggtgcatggccgttcttagttggtg
gagtgatttgtctggttaa--ttccgataacgaacgagactctgtcctgc-taaatag--
---tacg--ctgatctttggct---------cttcagt------------------gggc
tcca-gtcagt-gct--gac-ttcttagagggatacg-cggta------ttca-aaccgc
acgaaa-tagagcaataacaggtctgtgatgccctta-gatgtccggggccgcac-----
----------------------------------gcgcg-ctacaatgacagtatcaaag
agtatta-ccacctggtccgaaa-ggattgggaaatctt--ggcaatattgtcacatcag
ggattgagacttgtaattatttctcatgaacgaggaattcccagtagatgcaagtcatca
gcttgcgtcgattacgtccctgccctttgtacacaccgcccgtcgctactaccgattgaa
tggtttagtgaggtcctcggattgcgatctctgc------agt----------gaaagct
gc-------attg-atcatgag-aaga-cgatcgaac-ttgatcatttagaggaag--t-
aaaagtcgtaacaaggtt-tccgtaggtgaacctgc-ag---------------------
------------------------------------------------------------
------------------------------------------------------------
------------------------------------------------------------
------------------------------------------------------------
------------------------------------------------------------
-----------
>KC529442_Gieysztoria_cf_billabongensis_NVS2013
------------------------------------------------------------
--------------cctgccagtagtcat-atgcttgtctcaaagattaag-ccatgcat
gtataagaacggt-ca-a-gtta-ttggcctatccgcg-aatggctcattaaatcagcta
ttgtttcttagagctta-c----ttttacttgg--ataactgcagtaattctg-gagcta
ataca-tgcc--a--a-tgtgatctgttcgc-a----------agaatggatt-gggttt
attag-atca--aaatca-ac-cggt--c-------ttc-----------g-g-ac-tg-
t-tgg------------------gctga-tg-attctggataac-tatac--ctgaccgt
atag-cc--ttgtgctgacggcgtatc-tttcaagtgtctgacctatca-actgtcgatg
gtgagtgatatgctca-ccatggtgattacgggtaacggggaatcagtgttcgattccgg
agagggag-ccttagaaacggctaccacatctaaggaaggcagcaggcgcgcaaattacc
cactctcagcg----cgaggaggtagtga-cgaaaaataacgatggtagactc-attatg
aggcctaccaattggaatgagtacaa-tttaaatcc-ttt-aacgaggaccaattgg-ag
ggcaag-tctggtgccagcagccgcggtaattccagct-ccaatagcgtatattaaattt
gttgcagttaaaaagctcgtagttggatctcaggtg-ag-------agtca-ttgg-ttc
agccatct----ggttg-a---------tactaca-tgt-tctccgcctt----gtta--
-t---agctgtt-gatgctctgcagtggtcttcactgactgttg--ta-gagtgcacggc
acgtttactttgaacaaattagagtgcttaaagcaggcct--t--tgtgcttgaatag-t
ct-tgcatggaataatggaaaaggacttc---ggt-tct-attttgtt-g-gttttc-gg
a-a------tt-gaagtaa-tgattaacagagacag-tcgagggcatttgtatggtggtg
ttagaggtga---aattcttggatcgccgccagacaaac-tactgcgaaagcatttgcca
aggatgccttcattaatcaagaacgaaagtcagaggttcgaagacgatcagataccgt-c
ctagttctgactataaactttaccgactaaca-atcagtggtgg-tta---gaat-ttat
tgaccctactggctg-t-ccct-gggaaacc-tgaagtat--aggttctggggggaatat
ggt-cacaaggctgaaacttaaaggaattgacggaagggcaccaccaggagtggagcctg
cggcttaatttgactcaacacggggaaactcacccggcccggacactggaaggatggaca
gat--tgacagctctttcttgattcagtgggtggtggtgcatggccgttcttagttggtg
gagtgatttgtctggttaa--ttccgataacgaacgagactctattctgc-taaatag--
---tacg--ctgttcttggcat---------t--------------------tctaatgt
ctca-gacagt-gct--gac-ttcttagagagataag-cgata------ttta-aatcgc
aagaaa-gagagcaataacaggtctgtgatgccctta-gatgtccggggccgcac-----
----------------------------------gcgcg-ctacaatgacagtatcagaa
agtatta-aaacctattccgaaa-ggaatgggaaacctc--tgcattattgtctcatcag
ggattgagacttgtaattatttctcatgaacgaggaattcccagtagatgcaagtcatca
gcttgcgtcgattacgtccctgccctttgtacacaccgcccgtcgctactaccgattgaa
tggtttagtgaggtcctcggattgtggtctttgctg--g-tgt----------caaaacc
gc-------actg-actatgag-aaga-cgatcgaac-ttgatcatttagaggaag--t-
aaaagtcgtaacaaggtt-tccgtaggtgaacctgc-ag---------------------
------------------------------------------------------------
------------------------------------------------------------
------------------------------------------------------------
------------------------------------------------------------
------------------------------------------------------------
-----------
>KC529441_Dalyelliidae_sp_NVS2013
------------------------------------------------------------
------------------ccagtagtcat-atgcttgtctcaaagattaag-ccatgcat
gtataagaacggt-cg-a-gtaa-ttggcctatccgcg-aatggctcattaaatcagcta
ttgtttcttagagctta-c----ttttacttgg--ataactgcagtaattctg-gagcta
ataca-tgcc--a--a-tgtgatctgttcgc-a----------agaatggatt-gggttt
attag-atca--aaatca-ac-cggt--c-------ttc-----------g-g-ac-tg-
t-tgg------------------gctga-tg-attctggataac-tatac--ctgaccgt
atag-cc--ttgtgctgacggcgtatc-tttcaagtgtctgacctatca-actgtcgatg
gtgagtgatatgctca-ccatggtgattacgggtaacggggaatcagtgttcgattccgg
agagggag-ccttagaaacggctaccacatctaaggaaggcagcaggcgcgcaaattacc
cactctcagcg----cgaggaggtagtga-cgaaaaataacgatggtagactc-attatg
aggcctaccaattggaatgagtacaa-tttaaatcc-ttt-aacgaggaccaattgg-ag
ggcaag-tctggtgccagcagccgcggtaattccagct-ccaatagcgtatattaaattt
gttgcagttaaaaagctcgtagttggatctcaggtg-ag-------agtca-ttgg-ttc
agccatct----ggttg-a---------tactaca-tgt-tctccgcctt----gtta--
-t---agctgtt-gatgctctgcagtggtctttactgactgttg--ta-gagtgcacggc
acgtttactttgaacaaattagagtgcttaaagcaggcct--t--tgtgcttgaatag-t
ct-tgcatggaataatggaaaaggacttc---ggt-tct-attttgtt-g-gttttc-gg
a-a------tt-gaagtaa-tgattaacagagacag-tcgagggcatttgtatggtggtg
ttagaggtga---aattcttggatcgccgccagacaaac-tactgcgaaagcatttgcca
aggatgccttcattaatcaagaacgaaagtcagaggttcgaagacgatcagataccgt-c
ctagttctgactataaactttaccgactaaca-atcagtggtgg-tta---gaat-ttat
tgaccctactggctg-t-ccct-gggaaacc-tgaagtat--aggttctggggggaatat
ggt-cacaaggctgaaacttaaaggaattgacggaagggcaccaccaggagtggagcctg
cggcttaatttgactcaacacggggaaactcacccggcccggacactggaaggatggaca
gat--tgacagctctttcttgattcagtgggtggtggtgcatggccgttcttagttggtg
gagtgatttgtctggttaa--ttccgataacgaacgagactctattctgc-taaatag--
---tacg--ctgttcttggcat---------t--------------------tctaatgt
ctca-gacagt-gct--gac-ttcttagagagataag-cgata------ttca-aatcgc
aagaaa-gagagcaataacaggtctgtgatgccctta-gatgtccggggccgcac-----
----------------------------------gcgcg-ctacaatgacagtatcagaa
agtatta-aaacctattccgaaa-ggaatgggaaacctc--tgcattattgtctcatcag
ggattgagacttgtaattatttctcatgaacgaggaattcccagtagatgcaagtcatca
gcttgcgtcgattacgtccctgccctttgtacacaccgcccgtcgctactaccgattgaa
tggtttagtgaggtcctcggattgtggtctttgctg--g-tgt----------caaaacc
gc-------actg-actatgag-aaga-cgatcgaac-ttgatcatttagaggaag--t-
aaaagtcgtaacaaggtt-tccgtaggtgaacctg-------------------------
------------------------------------------------------------
------------------------------------------------------------
------------------------------------------------------------
------------------------------------------------------------
------------------------------------------------------------
-----------
>KC529440_Pseudodalyellia_alabamensis
------------------------------------------------------------
-------------tcctgccagtagtcat-atgcttgtctcaaagattaag-ccatgcat
gtataagtacacg-cc-t-caat-ctggcgaaaccgcg-aatggctcattaaatcagcta
ttgtttcttagatctta-c-ca-cattacttgg--ataactgcagtaattctg-gagcta
ataca-tgcc--a--attgtgcttcagtgga-a----------acattggagc-gggttt
attag-atca--aaatca-ac-caca--c-------tttc-------acga-g-tg-tg-
t-tgg------------------gctga-tg-attctggataac-ca-ac--ctgaccgt
atgg-cc--ttgtgccgacggcgtatc-tttcaagtgtctgacctatca-actgtcgatg
gtgagtgatatgctca-ccatggtgatcacgggtaacggggaatcagtgttcgattccgg
agagggag-ccttagaaacggctaccacatctaaggaaggcagcaggcgcgcaaattacc
cactctcagtt----cgaggaggtagtga-cgaaaaataacgatggtagactc-attatg
aggcctaccaattggaatgagtacaa-tttaaatcc-ttt-aacgaggagccattgg-ag
ggcaag-tctggtgccagcagccgcggtaattccagct-ccaatagcgtatattaaaatt
gttgcagttaaaaagctcgtagttggatctcaggtg-tg-------agtcg-atgg-tgc
aatctttgt---tattgtt---------tactgtt-cgt-tctccgccttctttact---
-g---agctgtt-gatgctctgtagtggtcttcactgactgttg--ca-gagtgcacggc
acgtttactttgaaaaaattagagtgctcaaagcaggcct--t--agtgcttgaatag-t
ct-tgcatggaataatggaagaggacttc---ggt-tct-attttgtt-g-gttttc-gg
t-a------cc-gaagtaa-tgattaaaagagacag-acgagggcatttgtatggtggtg
ttagaggtga---aattcttggatcgccgccagacaaac-tactgcgaaagcatttgcca
aggatgccttcattaatcaagaacgaaagtcagaggttcgaagacgatcagataccgt-c
ctagttctgactataaactttaccgactaaca-atcaggggcgg-tta---gaat-ttat
tgaccctcctggctg-t-ccct-gggaaacc-tgaagtat--aggttctggggggaatat
ggt-cacaaggctgaaacttaaaggaattgacggaagggcaccaccaggagtggagcctg
cggcttaatttgactcaacacggggaaactcacccggcccggacactggaaggatggaca
gat--tgacagctctttcttgattcagtgggtggtggtgcatggccgttcttagttggtg
gagtgatttgtctggttaa--ttccgataacgaacgagactctgtcctgc-taaatag--
---taca--ctgatcttggtcc---------cactcata--------------ctggggc
ttca-gtcagt-gct--gac-ttcttagagggatacg-cggta------ttca-aaccgc
acgaaa-tagagcaataacaggtctgtgatgccctta-gatgtccggggccgcac-----
----------------------------------gcgcg-ctacaatgacagttacaaag
agtatta-ccacctggtccgaga-ggattgggaaatctt--ggaataactgtctcatcag
ggattgagacttgtaattatttctcatgaacgaggaattcccagtaggtgcaagtcatca
gcttgcgtcgattacgtccctgccctttgtacacaccgcccgtcgctactaccgattgaa
tggtttagtgaggtcctcggatcgcgatctctgc------agt----------gcaagct
gc-------actg-atcatgag-aaga-cgatcgaac-ttgatcatttagaggaag--t-
aaaagtcgtaacaaggtt-tccgtaggtgaacctgc-aga--------------------
------------------------------------------------------------
------------------------------------------------------------
------------------------------------------------------------
------------------------------------------------------------
------------------------------------------------------------
-----------
>KC529439_Castrella_truncata
------------------------------------------------------------
--------------cctgccagatttgat-atacttgtctcaaagattaag-ccatgcat
gtatcagttcacg-cc-t-ctat-acggcgaaaccgcg-aatggctcattaaatcagcta
ttgtttcttagatctta-caat--cctacttgg--ataactgtagtaattcta-gagcta
ataca-tgcc--a--a-tgtgcgacaaccgc-a----------aggttgccgc-gggttt
attag-atca--aaatca-ac-cggc--t-------ctc-----------g-g-gc-cg-
t-tgg------------------gctga-tg-actctggataac-catac--ctgaccgc
atga-cc--ctgtgtcggcggcgtatc-tttcaagtgtctgacctatca-actgtcgatg
gtgtgtgatttgctca-ccatggttatcacgggtaacggggaatcagtgtttgattccgg
agaggcag-ccttagaaacggctaccacatctaaggaaggcagcaggcgcgcaaattacc
cactctcagtt----cgaggaggtagtga-cgaaaaataacgatgcaagactc-actatg
aggccttgcaattggaatgagtacaa-tttaaatcc-ttt-aacgaggatcaattgg-ag
ggcaag-tctggtgccagcagccgcggtaattccagct-ccaatagcgtataaataaatt
gttgcagttaaaaagctcgtagttggatctcaggtg-tg-------agtcg-tcgg-tac
agtcttcg----tactg-t---------tactgtt-cgc-tctccaccttcat-------
-a---agctgtc-gatgccctgtggtgctctttattgagtgcta--ca-gggtgcgcagc
acgtttactttgaaaaaattagagtgctcaaagcaggcc---t--tgcgcctgaatag-t
ct-tgcatggaataatggaacaggacttc---ggt-tct-attttgtt-g-attttc-gg
t-a------tc-gaagtaa-tgattaaaagagacag-acgtgggcatttgtatggtggtg
ttagaggtga---aattcttggatcgccgccagacaaac-tactgcgaaagcatttgcca
aggatgccttcattaatcaagaacgaaagtcagaggttcgaagacgatcagataccgt-c
ctagttttgactataaactttaccgaccaaca-atcaggggtgg-tta---gaat-ttat
tgaccctcctggctg-t-ccct-gggaaacc-ttaagta---aggttctggggggaatat
ggt-cacaaggctgaaacttaaaggaattgacggaagggcaccaccaggagtggagcctg
cggcttaatttgactcaacacggggaaactcacccggcccggacactgtaaggatggaca
gat--tgacagctctttcttgattcagtgggtggtggtgcatggccgttcttagttggtg
gagtgatttgtctggttaa--ttccgataacgaacgagactctgtcctgc-taaatag--
---taca--tcgatcttggc--------------------------------acttgtgt
ctta-gtcgat-gat--gac-ttcttagaggtatacg-cggta------ttta-aaccgc
acgaaa-tagagcaataacaggtctgtgatgccctta-gatgtccggggccgcac-----
----------------------------------gcgcg-ctacaatgacagtatcaaag
agtatta-acacctagtccgaaa-ggattgggaaacctt--cgcattattgtcttatcag
ggattgagacttgtaattatttctcatgaacgaggaattcccagtaggcgcaagtcatca
gcttgcgtcgattacgtccctgccctttgtacacaccgcccgtcgctactaccgattgaa
tggtttagtgaggtccttggatcgtgagctttgc------agt----------gcaagct
gc-------attg-atcatgag-aaga-cgatcgaac-ttgatcatttagaggaag--t-
aaaagtcgtaacaaggtt-tccgtaggtgaacctgc------------------------
------------------------------------------------------------
------------------------------------------------------------
------------------------------------------------------------
------------------------------------------------------------
------------------------------------------------------------
-----------
>KC529438_Castrella_pinguis
------------------------------------------------------------
-----------------------------------------------------catgcat
gtatcagttcacg-cc-t-ttat-acggcgaaaccgcg-aatggctcattaaatcagcta
ttgtttcttagatctta-caat--cctacttgg--ataactgtagtaattcta-gagcta
ataca-tgcc--a--a-tgtgtgacaaccgc-a----------aggttgtcac-gggttt
attag-atca--aaatca-ac-cggc--t-------ctc-----------g-g-gc-cg-
t-tgg------------------gctga-tg-actctggataac-catac--ctgaccgc
atga-cc--ctgtgtcggcggcgtatc-tttcaagtgtctgacctatca-actgtcgatg
gtgtgtgatatgctca-ccatggttatcacgggtaacggggaatcagtgtttgattccgg
agaggcag-ccttagaaacggctaccacatctaaggaaggcagcaggcgcgcaaattacc
cactctcagtt----cgaggaggtagtga-cgaaaaataacgatgcaagactc-actatg
aggccttgcaattggaatgagtacaa-tttaaatcc-ttt-aacgaggatcaattgg-ag
ggcaag-tctggtgccagcagccgcggtaattccagct-ccaatagcgtataaataaatt
gttgcagttaaaaagctcgtagttggatctcaggtg-tg-------agtcg-tcgg-tac
agtcttcg----tactg-t---------tactgtt-cgc-tctccaccttcat-------
-a---agctgtc-gatgccctgtggtgctctttattgagtgcta--ca-gggtgcgcagc
acgtttactttgaaaaaattagagtgctcaaagcaggcc---c--tgcgcctgaatag-t
ct-tgcatggaataatggaacaggacttc---ggt-tct-attttgtt-g-attttc-gg
t-a------tc-gaagtaa-tgattaaaagagacag-acgtgggcatttgtatggtggtg
ttagaggtga---aattcttggatcgccgccagacaaac-tactgcgaaagcatttgcca
aggatgccttcattaatcaagaacgaaagtcagaggttcgaagacgatcagataccgt-c
ctagttttgactataaactttaccgaccaaca-atcaggggtgg-tta---gaat-ttat
tgaccctcctggctg-t-ccct-gggaaacc-ttaagta---aggttctggggggaatat
ggt-cacaaggctgaaacttaaaggaattgacggaagggcaccaccaggagtggagcctg
cggcttaatttgactcaacacggggaaactcacccggcccggacactgtaaggatggaca
gat--tgacagctctttcttgattcagtgggtggtggtgcatggccgttcttagttggtg
gagtgatttgtctggttaa--ttccgataacgaacgagactctgtcctgc-taaatag--
---taca--tcgatcttggc--------------------------------acttgtgt
ctta-gtcgat-gat--gac-ttcttagaggtatacg-cggta------ttta-aaccgc
acgaaa-tagagcaataacaggtctgtgatgccctta-gatgtccggggccgcac-----
----------------------------------gcgcg-ctacaatgacagtatcaaag
agtatta-acacctagtccgaaa-ggattgggaaacctt--cgcattattgtcttatcag
ggattgagacttgtaattatttctcatgaacgaggaattcccagtaggcgcaagtcatca
gcttgcgtcgattacgtccctgccctttgtacacaccgcccgtcgctactaccgattgaa
tggtttagtgaggtccttggatcgagagctttgc------agt----------gcaaatt
gc-------attg-atcttgag-aaga-cgatcgaac-ttgatcatttagaggaag--t-
aaaagtcgtaacaaggtt-tccgtaggtgaacctg-------------------------
------------------------------------------------------------
------------------------------------------------------------
------------------------------------------------------------
------------------------------------------------------------
------------------------------------------------------------
-----------
>KC529437_Halammovortex_sp_NVS2013
------------------------------------------------------------
tacctg-gtt-gatcctgccagtagtcat-atgcttgtctcaaagattaag-ccatgcat
gtacaagttcaaa-cc-c-tcgg-aaggttaaactgcg-aatggctcattaaatcagctt
tggtttcttagacctta-cctt---atacttga--ataactacagtaattctg-gagcta
atgca-tgcc--a--c-tgtgcgatttgggc-t-------tg-cccattttgc-ggtttg
attag-atca--aagcca-ac-cggac-c-------gtaa----------g-g-tc-tg-
t-tagc-----------------agaga-tg-actctagatcac-ca-ac--ctaatcgc
atga-cc--ctgtgtcggcgatgtatc-tttcaaatatctgacctatca-actttcgatg
gtgagtgatatgctca-ccatggttataacgggtaacggggaatcagtgttcgattccgg
agagggag-ccttaaaaacggctaccacatctaaggaaggcagcaggcgcgcaaattacc
cactctcaatt----cgaggaggtagtga-cgaaaaataacaatgcatgactc-acaaag
aggctatgcaattggaatgagtacaa-tttaaatcc-ttt-aacgaggatcaattgg-ag
ggcaag-tctggtgccagcagccgcggtaattccagct-ccaatagcgtatattaaaatt
gctgcagttgaaaagctcgtagttggatatcaggtt-ca-------gaccg-gtgg-tgc
aacttttg---tttgc------------catcatc-cgt--gtctgtccttaa-------
cc---agccgtttg-aactttgc-gtgctcttaattgagtgcaa--ct-agat-cacggc
aagtttactttgaacaaattaaagtgctcaaagcaggcctacc--caagcctgaatag-t
tt-tgcatggaataatgaaagaggacttc---ggt-tct--atttgtt-g-gttttc-gg
t-a------tc-gaagtaa-tgattaaaagagactg-acgggggcttatgtatggcggtg
tgagaggtga---aattctaggatcgccgccagacagcc-tactgcgaaagcatttgcca
aggatgccttcattaatcaagaacgaaagtgaaaggttcgaagacgatcagataccgt-c
ctagttttcaccctaaacgttgccgactcaca-atctggtatgg-tta---tatt-ttat
tggcctaccaggctg-t-ccct-gggaaacc-tgaagtat--aggttctggggggaatat
ggt-cgcaaggcagaaacttaaaggaattgacggaagggcaccaccagatgtggagcctg
cggcttaatttgactcaacacggggaaactcacccggcccggacactgtaaggattgaca
gaa--tgatagctcttttttgattcagtggatggtggtgcatggccgttcttagttcgtg
gagtgatttgtctggttaa--ttccgataacgaacgagactctaatctgc-taaatag--
---tatg--caaacatagg------------------------------cacttcggtgt
catc-gtttgt-gct--gac-ttcttagagagataag-cgga-------ttca-agccgc
aagaaa-gagagcaataacaggtctgtgatgccctta-gatgtccggggccgcac-----
----------------------------------gcgcg-ctacaatgacaatatcagca
agtatta-acacctgtctcgaaa-gagatggggaatctt--tgcattattgtctcatcag
ggattgagatttgtaattatttctcatgaacgaggaatatctagtaggcgcaagtcatca
gcttgcgtcgattacgtccctgccctttgtacacaccgcccgtcgctactaccgattgaa
tggtttagtgaggtcatcggatcgagaacttgtgat--g---------g----caacatt
ac-------tatg-tttttgag-aaga-cgatcgaac-ttgatcatttagaggaag--t-
aaaagtcgtaacaaggtt-tccgtaggtgaacctgc-ag---------------------
------------------------------------------------------------
------------------------------------------------------------
------------------------------------------------------------
------------------------------------------------------------
------------------------------------------------------------
-----------
>KC529436_Byrsophlebidae_sp_NVS2013
------------------------------------------------------------
-----------gatcctgccagtaattat-atgcttgtctcaaagactaag-ccatgcat
gtcaaagttcaca-cc-t-tagc-acggtgaaaccgca-tatggctcattaaatcagcta
taattccttagatctta-attc--cttacttgg--ataactgtagtaattcta-gagcta
ataca-tgaa--c--a-aatgcctcagtct---------------ctgggtgc-ggattt
attag-aaca--aaacca-tc-cgg---c-------ttc-----------g-g--t-cg-
t-tc-------------------tttggtta-actctggataac-tt-ac--atgatcgc
atga-cc--ttgtgtcggcgacgtatc-tttcaagtgtctgacctatca-actgacgatg
gtgaggtatatgctca-ccatggttataacgggtaacggggaatcagggtttgataccgg
agagggag-ccttagaaacggctaccacatctaaggaaggcagcaggcgcgcaaattacc
cactctcagat----agaggaggtagtga-caataaataacaatgcgggactc-atgatg
aggctccgcaattggaatgagtacaa-tttaaatcc-ttt-aacgaggatcaattag-ag
ggcaag-tctggtgccagcagccgcggtaattccagct-ctaatagcgtatattaaaatt
gttgcagttaaaaagctcgtagttgaacctcaggtg-tg-------gtgtg-acgg-ttt
agtcgtat----ggcta-c---------aactgtt-tac--atccgcctttat-------
-c---agctgtatgtcactcctcggtgttttttattaaacgctgt-gt-gagtgcccagc
acgtttaccttgaaaaaatcagagtgcttaaagcaggcct--t--tgtgcttgaatgg-t
ga-tgcatggaataataaaataggacttc---ggt-act-attttgtt-g-gtttcc-gg
t-a------tt-gaagtaa-tgaataatagggaatg-atgggatgatttgtatggtggcg
ggagaggtga---aattctgagatcgttgccagacaaac-tactgcgaaagcatttcatc
aataattcctcattaatcaagaacgaaagttagaggttcgaagacgatcagataccgt-c
ctagttctaaccataaacgatgccgacctata-attagaagtgg-tta---tgtttttat
tgacccttctagttg-t-ccct-gggaaaccttttagta---aggttctggggggaatat
ggt-ctcaaggccgaaacttaaaggaattgacggaagggcaccaccaggagtggagcctg
cggcttaatttgactcaacacggggaatctcacccggtccggacactgggaggattgaca
gat--tgatagctctttcttgattcagtggatggtggtgcatggccgttcttagttggtg
gagtgatttgtctggttaa--ttccgataacgaacgagactctatcctgc-taaatag--
---tttg--gtaacatcta--------------ccttcg------------------ggt
atca-gttgct-ata--aac-ttcttagaggaatttg-cagaat-----gtta-aactgc
acgaaa-gagagcaataacaggtctgtgatgccctta-gatgtccggggccgcac-----
----------------------------------gcggg-ctacattgacagtaacaata
agtattt-caacctggtccgaaa-ggattaggaaatctt--agaattgctgtctccacag
ggattggggtttgcaattatcccccatgaacgaggaattcctagtaggcgcaggtcatca
gcctgcgtcgattacgtccctgccctttgtacacaccgcccgtcgctactaccgatcgag
tggattagtgaggacctcggattggcaaattggc-a--g-c------------gtcagtt
gt-------tatt-ttgccgaa-aagt-ggttcaaac-ttgttcatttagaggaag--t-
aaaagtcgtaacaaggtt-tccgtaggtgaacctgc-aga-tggat--------------
------------------------------------------------------------
------------------------------------------------------------
------------------------------------------------------------
------------------------------------------------------------
------------------------------------------------------------
-----------
>KC529435_Byrsophlebs_delamarei
------------------------------------------------------------
-----------gatcctgccagtaattat-atgcttgtctcaaagactaag-ccatgcat
gtatcagttcaaa-cc-t-taaa-acggtgaaaccgcg-aatggctcattaaatcagcta
taatttcttagatctta-aaaa--gttacttgg--ataactgtagtaattcta-gagcta
ataca-tgaa--c--a-aatgcctcagttt--------------actgggtgc-ggattt
attag-aaca--aaacca-ac-cga---c-------ttc-----------g-g--t-cg-
t-aa-------------------attgg-tg-actctggataac-tt-tt--ctgatcgc
atga-cc--ttgtgtcggcgacgtatc-tttcaagtgtctgacctatca-actgacgttg
gtgagttatatgctca-ccatggttataacgggtaacggggaatcagggtttgataccgg
agagggag-ccttagaaacggctaccacatctaaggaaggcagcaggcgcgcaaattacc
cactctcagct----agaggaggtagtga-caataaataacaatgcgggactc-atgatg
aggctccgcaattggaatgagtacaa-tttaaatcc-ttt-aacgaggatcaattag-ag
ggcaag-tctggtgccagcagccgcggtaattccagct-ctaatagcgtatattaaaatt
gttgcagttaaaaagctcgtagttgaacctcaggtg-tg-------atgtg-tcgg-tct
agccgttt----ggcta-t---------gactgtt-tac--attcacctttat-------
-t---agctgtatgccgctcctcggtgtttttcattaaatgctgt-gt-gagtgctcagc
acgtttaccttgaaaaaatcagagtgcttaaagcaggcct--t--tgcgcttgtatgg-t
ga-tgcatggaataatggaataggacttt---ggt-tct-attttgtt-g-gttttc-gg
t-a------ct-aaagtaa-tgaataatagggaatg-atgggatcatttgtatggcggtg
ggagaggtga---aattctgagatcgctgccagacaaac-tactgcgaaagcatttgata
aataattccccattaatcaagaacgaaagttagaggttcgaagacgatcagataccgt-c
ctagttctaaccataaacgatgccgaccgata-attagaagcgg-tta---tatttttat
tgacccttctagttg-t-ccct-gggaaaccttttagta---aggttctggggggaatat
ggt-ctcaaggccgaaacttaaaggaattgacggaagggcaccaccaggagtggagcctg
cggcttaatttgactcaacacgggaaatctcacccggtccggacactaggaggattgaca
gat--tgatagctctttcttgatttagtggatggtggtgcatggccgttcttagttggtg
gagtgatttgtctggttaa--ttccgataacgaacgagactctatcctgc-taaatag--
---ttaa--acaacatctg--------------ctttcg------------------ggc
aacg-gttgtt-gaa--aac-ttcttagaggaattcg-cggaat-----gtta-aaccgc
acgaaa-gagagcaataacaggtctgtgatgccctta-gatgtccggggccgcac-----
----------------------------------gcgcg-ctacattgacagtaacaata
agtattt-caacctggtccgaaa-ggattaggaaatctt--agaattgctgtctccacag
ggattggggtttgcaattatcccccatgaacgaggaattcctagtaggcgcaggtcatca
gcctgcgtcgattacgtccctgccctttgtacacaccgcccgtcgctactaccgatcgag
tggattagtgaggacctcggattggcgatttggc-a--g-c------------gcaagct
gt-------tatt-ttgccgaa-aagt-ggttcaaac-ttgttcatttagaggaag--t-
aaaagtcgtaacaaggtt-tccgtaggtgaacctgc-aga-tggatcaa-----------
------------------------------------------------------------
------------------------------------------------------------
------------------------------------------------------------
------------------------------------------------------------
------------------------------------------------------------
-----------
>KC529434_Promesostoma_maculosum
------------------------------------------------------------
------------------------------------------------------------
----------------------------------cgcg-aatggctcattaaatcagcta
ttatttattagatctta-caag--attacttgg--ataactgtagtaattcta-gagcta
ataca-tgaa--a--a-tgtgctttggttta------------cgccaaatgc-gaattt
attag-atca--aaacca-ac-cgg---t-------ttc-----------g-g--c-cg-
t-t-t------------------attgg-tg-actcgggataac-ta-tt--ctgatcgc
atga-cc--ttgtgtcggcgacgtatc-tttcaagtgtctgccctatca-actt--gttg
gtgagttagttgctca-ccagggttataacgggtaacggagaatcagtgttcgataccgg
agagggag-ccttagaaacggctaccacatctaaggaaggcagcaggcgcgcaaattacc
cactctcagaa----cgaggaggtagtga-atttaaatagcgatgatgaactc-ttat-g
aggctcgtcaatcgaaatgagtacaa-tttaaatcc-ttt-aacgagtaccaattgg-ag
ggcaag-tctggtgccagcagccgcggtaattccagct-ccaatagcgaatattaaaatt
gttgcagttaaaaagctcgtagttggatccaaggtt-ag-------atttg-actg-tct
gttctttg----tagca-g---------cactgtt-cat--gtctgcctttat-------
-t---agttgactgt-tcactatggtggtcttcaccgactgcta--ta-gtgtgctcaac
acgtttaccttgaaaaaatcagagcgctcaaggcaggcct--t--tgtgcttgtatgt-t
ct-tgcaaggaataatagaataggacttc---ggt-tct-attttgtt-g-gttttc-ag
a-a------tt-gaagtaa-tgaataatagagacag-tcgggggcatttgtatggtggcg
ttagaggtga---aattctgagatcgtcgccagacaaac-tactgcgaaagcatttgcca
aggatgtcttcattaatcaagaacgaaagtcagaggttcgaagacgatcagataccgt-c
ctagttctgaccataaacgatgccgacctaca-atcgggggtgg-tta---tataattat
tgaccctcccggctg-t-cctc-aggaaa-c-tttaagt---tggttctggggggaatat
ggt-cgcaagactgaaacttaaaggaattgacggaagggcaccaccaggagtggagcctg
cggcttaatttgactcaacacggggaatctcacccggtccggacactgttaggatggaca
gat--tgatagctctttcttgattcagtgggtggtggtgcatggccgttcttagttggtg
gagtgatttgtctggttaa--ttccgataacgaacgagactctgtcctgc-taaatag--
---tcca--gtggcatcaa--------------tcactt----------t-----gtggt
taca-gctact-g-t--tac-ttcttagagggattcg-cgga-------ttta-aaccgc
acgaaa-tagagcaataacaggtctgtgatgccctta-gatgtccggggccgcac-----
----------------------------------gcgcg-ctacattgacagtagaaacg
agtattc-acacctgatccgaaa-ggattgggaaatctt--tgaattactgtctccacag
ggattgaggtttgtaattttgcctcatgaacgaggaattcccagtaggcgcaagtcatca
gcttgcgtcgattacgtccctgccctttgtacacaccgcccgtcgctactaccgattgag
tgcattagtgaggacctcggattgagaacatttt-g--t-c------------gcaagac
aa-------tttg-tttttgaa-aagt-ggttcaaat-ttgtgcatttagagatag--t-
aaaagtcgtaacaaggtt-tccgtag----------------------------------
------------------------------------------------------------
------------------------------------------------------------
------------------------------------------------------------
------------------------------------------------------------
------------------------------------------------------------
-----------
>KC529433_Promesostoma_meixneri
------------------------------------------------------------
------------------------------------------------------------
-------------------------------------g-aatggctcattaaatcagcta
ttatttattagatctta-caag--attacttgg--ataactgtagtaattcta-gagcta
ataca-tgaa--t--a-tgtgctttggttca------------cgccaaatgc-gaattt
attag-atca--aaacca-ac-cgg---t-------ttc-----------g-g--c-cg-
t-taa------------------attgg-tg-actctggataac-ta-tt--ctgatcgc
atga-cc--ttgtgtcggcgacgtatc-tttcaagtgtctgccctatca-acttaagttg
gtgagttagttgctca-ccatggttataacgggtaacggagaatcagtgttcgataccgg
agagggag-ccttagaaacggctaccacatctaaggaaggcagcaggcgcgcaaattacc
cactctcagaa----cgaggaggtagtga-atttaaatagcgatgatgaactc-ttat-g
aggctcgtcaatcgaaatgagtacaa-tttaaatcc-ttt-aacgagtaccaattgg-ag
ggcaag-tctggtgccagcagccgcggtaattccagct-ccaatagcgaatattaaattt
gttgcagttaaaaagctcgtagttggatccaaggtt-ag-------gcatg-cctg-tct
gttcttag----tagca-t---------gactgtg-tgt--gtctgcctttat-------
-t---agttgaatgt-tcattatggtggtcttcatcgactgcta--tg-atgtgctcaac
acgtttaccttgaaaaaatcagagcgatcaaggcaggcct--t--cgtgcttgtatgt-t
gt-tgcaaggaataatagaataggacttc---ggt-tct-attttgtt-g-gttttg-ag
a-a------tt-gaagtaa-tgaataatagagacag-tcgggggcatttgtatggtggcg
ttagaggtga---aattctgagatcgtcgccagacaaac-tactgcgaaagcatttgcca
agtatgtcttcattaatcaagaacgaaagtcagaggttcgaagacgatcagataccgt-c
ctagttctgaccataaacgatgccgacctaca-atcgggggtgg-t-----ttattatat
tgaccctcccggctg-t-cctc-aggaaa-c-tttaagt---tggttctggggggaatat
ggt-ctcaagactgaaacttaaaggaattgacggaagggcaccaccaggagtggagcctg
cggcttaatttgactcaacacggggaatctcacccggtccggacactggtaggatggaca
gat--tgatagctctttcttgattcagtgggtggtggtgcatggccgttcttagttggtg
gagtgatttgtctggttaa--ttccgataacgaacgagactctgtcctgc-taaatag--
---tcca--gtggcatcaa--------------tcactt----------t-----gtgat
taca-gctgct-g-t--tac-ttcttagagggattcg-cgga-------ttta-aaccgc
aagaaa-tagagcaataacaggtctgtgatgccctta-gatgtccggggccgcac-----
----------------------------------gcgcg-ctacattgacagtagaagcg
agtattt-ctacctggttcgaaa-gaattgggaaatctt--cgaattactgtctccacag
ggattgaggtttgcaattttgcctcatgaacgaggaattcccagtaggcgcaagtcatca
gcttgcgtcgattacgtccctgccctttgtacacaccgcccgtcgctactaccgattgag
tgcattagtgaggacctcggattgagaacatagt-g--g-c------------gcaagtt
ac-------tttg-ttttcgaa-aagt-ggttcaaat-ttgtgcatttagagatag--t-
aaaagtcgtaacaaggtt-tccgtag-g--------------------------------
------------------------------------------------------------
------------------------------------------------------------
------------------------------------------------------------
------------------------------------------------------------
------------------------------------------------------------
-----------
>KC529432_Promesostoma_caligulatum
------------------------------------------------------------
------------------------------------------------------------
----------------------------------cgcg-aatggctcattaaatcagcta
ttatttattagatctta-caag--attacttgg--ataactgtagtaattcta-gagcta
ataca-tgaa--t--a-tgtgctttggttca------------cgccaaatgc-gaattt
attag-atca--aaacca-ac-cgg---t-------ttc-----------g-g--c-cg-
t-taa------------------attgg-tg-actctggataac-ta-tt--ctgatcgc
atga-cc--ttgtgtcggcgacgtatc-tttcaagtgtctgccctatca-acttaagttg
gtgagttagttgctca-ccatggttataacgggtaacggagaatcagtgttcgataccgg
agagggag-ccttagaaacggctaccacatctaaggaaggcagcaggcgcgcaaattacc
cactctcagaa----cgaggaggtagtga-atttaaatagcgatgatgaactc-ttat-g
aggctcgtcaatcgaaatgagtacaa-tttaaatcc-ttt-aacgagtaccaattgg-ag
ggcaag-tctggtgccagcagccgcggtaattccagct-ccaatagcgaatattaaattt
gttgcagttaaaaagctcgtagttggatccaaggtt-ag-------gcatg-cctg-tct
gttcttag----tagca-t---------gactgtg-tgt--gtctgcctttat-------
-t---agttgaatgt-tcattatggtggtcttaatcgactgcta--tg-atgtgctcaac
acgtttaccttgaaaaaatcagagcgatcaaggcaggcct--t--cgtgcttgtatgt-t
gt-tgcaaggaataatagaataggacttc---ggt-tct-attttgtt-g-gttttg-ag
a-a------tt-gaagtaa-tgaataatagagacag-tcgggggcatttgtatggtggcg
ttagaggtga---aattctgagatcgtcgccagacaaac-tactgcgaaagcatttgcca
agtatgtcttcattaatcaagaacgaaagtcagaggttcgaagacgatcagataccgt-c
ctagttctgaccataaacgatgccgacctaca-atcgggggtgg-t-----ttattatat
tgaccctcccggctg-t-cctc-aggaaa-c-tttaagt---tggttctggggggaatat
ggt-ctcaagactgaaacttaaaggaattgacggaagggcaccaccaggagtggagcctg
cggcttaatttgactcaacacggggaatctcacccggtccggacactggtaggatggaca
gat--tgatagctctttcttgattcagtgggtggtggtgcatggccgttcttagttggtg
gagtgatttgtctggttaa--ttccgataacgaacgagactctgtcctgc-taaatag--
---tcca--gtggcatcaa--------------tcacta----------t-----gtgat
taca-gctgct-g-t--tac-ttcttagagggattcg-cgga-------ttta-aaccgc
aagaaa-tagagcaataacaggtctgtgatgccctta-gatgtccggggccgcac-----
----------------------------------gcgcg-ctacattgacagtagaagcg
agtattt-ctacctggttcgaaa-gaattgggaaatctt--cgaattactgtctccacag
ggattgaggtttgcaattttgcctcatgaacgaggaattcccagtaggcgcaagtcatca
gcttgcgtcgattacgtccctgccctttgtacacaccgcccgtcgctactaccgattgag
tgcattagtgaggacctcggattgagaacttagt-g--g-c------------gcaagtt
ac-------tttg-ttttcgaa-aagt-ggttcaaat-ttgtgcatttagagatag--t-
aaaagtcgtaacaaggtt-tccgtag----------------------------------
------------------------------------------------------------
------------------------------------------------------------
------------------------------------------------------------
------------------------------------------------------------
------------------------------------------------------------
-----------
>KC529431_Promesostoma_sp_NVS2013
------------------------------------------------------------
------------------------------------------------------------
-------------------------------------g-aatggctcattaaatcagcta
ttatttattagatctta-caag--attacttgg--ataactgtagtaattcta-gagcta
ataca-tgaa--t--a-tgtgctttggttca------------cgccaaatgc-gaattt
attag-atca--aaacca-ac-cgg---c-------ttc-----------g-g--c-cg-
t-t-t------------------attgg-tg-actctggataac-tt-tt--ctgatcgc
atga-cc--ttgtgtcggcgacgtatc-tttcaagtgtctgacctatca-acttaagttg
gtgagttagttgctca-ccatggttataacgggtaacggagaatcagtgttcgataccgg
agagggag-ccttagaaacggctaccacatctaaggaaggcagcaggcgcgcaaattacc
cactctcagaa----cgaggaggtagtga-atttaaatagcgatgatgaactc-ttat-g
aggctcgtcaatcgaaatgagtacaa-tttaaatcc-ttt-aacgagtaccaattgg-ag
ggcaag-tctggtgccagcagccgcggtaattccagct-ccaatagcgaatattaaaatt
gttgcagttaaaaagctcgtagttggatccaaggtt-gg-------gcatg-cctg-tct
gttcttag----tagca-t---------gactgtg-tgt--gtccgcctttat-------
-t---agttgactgt-tcactatggtggttttaatcgactgctc--ta-gtgtgctcaac
acgtttaccttgaaaaaatcagagcgatcaaggcaggcct--t--tgtgcttgtatgt-t
gt-tgcaaggaataatagaataggacttc---ggt-tct-attttgtt-g-gttttg-ag
a-a------tt-gaagtaa-tgaataatagagacag-tcgggggcatttgtatggtggcg
ttagaggtga---aattctgagatcgtcgccagacaaac-tactgcgaaagcatttgcca
agcatgtcttcattaatcaagaacgaaagtcagaggttcgaagacgatcagataccgt-c
ctagttctgaccataaacgatgccgacctaca-atcgggggtgg-t-----ttattattt
tgaccctcccggctg-t-cctc-aggaaa-c-tttaagt---tggttctggggggaatat
ggt-ctcaagactgaaacttaaaggaattgacggaagggcaccaccaggagtggagcctg
cggcttaatttgactcaacacggggaatctcacccggtccggacactggtaggatggaca
gat--tgatagctctttcttgattcagtgggtggtggtgcatggccgttcttagttggtg
gagtgatttgtctggttaa--ttccgataacgaacgagactctgtcctgc-taaatag--
---tcca--gcggcatcaa--------------tcattc----------t-----atgat
taca-gctgct-g-t--tac-ttcttagagggattcg-cgga-------ttca-aaccgc
aagaaa-tagagcaataacaggtctgtgatgccctta-gatgtccggggccgcac-----
----------------------------------gcgcg-ctacattgacagtaaaagcg
agtattt-ctacctggtccgaaa-ggactgggaaatctt--tgaattactgtctccacag
ggattgaggtttgcaattttgcctcatgaacgaggaattcccagtaggcgcaagtcatca
gcttgcgtcgattacgtccctgccctttgtacacaccgcccgtcgctactaccgattgag
tgcattagtgaggacctcggattgagaacttatt-g--g-c------------gaaagtt
aa-------tttg-ttttcgaa-aagt-ggttcaaat-ttgtgcatttagagatag--t-
aaaagtcgtaacaaggtt-tccgtag----------------------------------
------------------------------------------------------------
------------------------------------------------------------
------------------------------------------------------------
------------------------------------------------------------
------------------------------------------------------------
-----------
>KC529430_Promesostoma_marmoratum
------------------------------------------------------------
------------------------------------------------------------
-------------------------------------g-aatggctcattaaatcagcta
ttatttattagatctta-caag--attacttgg--ataactgtagtaattcta-gagcta
ataca-tgaa--t--a-tgtgctttggttca------------cgccaaatgc-gaattt
attag-atca--aaacca-ac-cgg---t-------ttc-----------g-g--c-cg-
t-taa------------------attgg-tg-actctggataac-ta-tt--ctgatcgc
atga-cc--ttgtgtcggcgacgtatc-tttcaagtgtctgccctatca-acttaagttg
gtgagttagttgctca-ccatggttataacgggtaacggagaatcagtgttcgataccgg
agagggag-ccttagaaacggctaccacatctaaggaaggcagcaggcgcgcaaattacc
cactctcagaa----cgaggaggtagtga-atttaaatagcgatgatgaactc-ttat-g
aggctcgtcaatcgaaatgagtacaa-tttaaatcc-ttt-aacgagtaccaattgg-ag
ggcaag-tctggtgccagcagccgcggtaattccagct-ccaatagcgaatattaaattt
gttgcagttaaaaagctcgtagttggatccaaggtt-ag-------gcatg-cctg-tct
gttcttag----tagca-t---------gactgtg-tgt--gtctgcctttat-------
-t---agttgaatgt-tcattatggtggtcttcatcgactgcta--tg-atgtgctcaac
acgtttaccttgaaaaaatcagagcgatcaaggcaggcct--t--cgtgcttgtatgt-t
gt-tgcaaggaataatagaataggacttc---ggt-tct-attttgtt-g-gttttg-ag
a-a------tt-gaagtaa-tgaacaatagagacag-tcgggggcatttgtatggtggcg
ttagaggtga---aattctgagatcgtcgccagacaaac-tactgcgaaagcatttgcca
aggatgtcttcattaatcaagaacgaaagtcagaggttcgaagacgatcagataccgt-c
ctagttctgaccataaacgatgccgacctaca-atcgggggtgg-t-----ttattatat
tgaccctcccggctg-t-cctc-aggaaa-c-tttaagt---tggttctggggggaatat
ggt-ctcaagactgaaacttaaaggaattgacggaagggcaccaccaggagtggagcctg
cggcttaatttgactcaacacggggaatctcacccggtccggacactggtaggatggaca
gat--tgatagctctttcttgattcagtgggtggtggtgcatggccgttcttagttggtg
gagtgatttgtctggttaa--ttccgataacgaacgagactctgtcctgc-taaatag--
---tcca--gtggcatcaa--------------tcacta----------t-----gtgat
taca-gctgct-g-t--tac-ttcttagagggattcg-cgga-------ttta-aaccgc
aagaaa-tagagcaataacaggtctgtgatgccctta-gatgtccggggccgcac-----
----------------------------------gcgcg-ctacattgacagtagaagcg
agtattt-ctacctggttcgaaa-gaattgggaaatctt--cgaattactgtctccacag
ggattgaggtttgcaattttgcctcatgaacgaggaattcccagtaggcgcaagtcatca
gcttgcgtcgattacgtccctgccctttgtacacaccgcccgtcgctactaccgattgag
tgcattagtgaggacctcggattgagaacatagt-g--g-c------------gcaagtt
ac-------tttg-ttttcgaa-aagt-ggttcaaat-ttgtgcatttagagatag--t-
aaaagtcgtaacaaggtt-tccgtag----------------------------------
------------------------------------------------------------
------------------------------------------------------------
------------------------------------------------------------
------------------------------------------------------------
------------------------------------------------------------
-----------
>KC529429_Promesostoma_cochleare
------------------------------------------------------------
------------------------------------------------------------
---------------------------------------aatggctcattaaatcagcta
ttatttattagatctta-caaa--attacttgg--ataactgtagtaattcta-gagcta
ataca-tgaa--a--a-tgtgctttggctaa------------caccaaatgc-gaattt
attag-atca--aaacca-ac-cgg---t-------ttc-----------g-g--c-cg-
t-t-a------------------attgg-tg-actcggaataac-ta-ct--ctgatcgc
atga-cc--tagtgtcggcgacgtatc-tttcaagtgtctgccctatca-acttaagttg
gtgagttagttgctca-ccatggttataacgggtaacggagaatcagtgttcgataccgg
agagggag-ccttagaaacggctaccacatctaaggaaggcagcaggcgcgcaaattacc
cactctcagaa----cgaggaggtagtga-atttaaatagcgatgacgaactc-tttcag
aggcttgtcaatcgaaatgagtacaa-tttaaatcc-ttt-aacgagtaccaattgg-ag
ggcaag-tctggtgccagcagccgcggtaattccagct-ccaatagcgaatattaaattt
gttgcagttaaaaagctcgtagttggatccaaggtt-ag-------atatg-actg-tct
gctctttg----tagca-t---------gactgtt-cat--atctgcctttat-------
-t---agttgatagt-gcattatggtggtcttaaacgattgcta--ta-gtgtgctcagc
acgtttaccttgaaaaaatcagagcgatcaaggcaggcct--t--tgtgcttgtatgt-t
ct-tgcaaggaataatagaataggacttc---ggt-tct-attttgtt-g-gttttg-ag
a-a------tt-gaagtaa-tgaataatagagacag-tcgggggcatttgtatggtggcg
ttagaggtga---aattctgagatcgtcgccagacaaac-tactgcgaaagcatttgcca
aggatgtcttcattaatcaagaacgaaagtcagaggttcgaagacgatcagataccgt-c
ctagttctgaccataaacgatgccgacctaca-atcgggggtgg-tta---ttataatac
tgaccctcccggctg-t-cctc-aggaaa-c-tttaagt---tggttctggggggaatat
ggt-ctcaagactgaaacttaaaggaattgacggaagggcaccaccaggagtggagcctg
cggcttaatttgactcaacacggggaatctcacccggtccggacactggtaggatggaca
gat--tgatagctctttcttgattcagtgggtggtggtgcatggccgttcttagttggtg
gagtgatttgtctggttaa--ttccgataacgaacgagactctggtctgc-taaatag--
---tcca--gtggcatcaa--------------tcactt----------t-----gtgat
taca-gctact-g-t--cac-ttcttagagagattcg-cgga-------ctta-aaccgc
acgaaa-tagagcaataacaggtctgtgatgccctta-gatgtccggggccgcac-----
----------------------------------gcgcg-ctacattgacagtagaaacg
agtattt-ccacctggttcgaaa-gaattgggaaatctt--tgaattactgtctccacag
ggattgaggtttgtaattttgcctcatgaacgaggaattcccagtaggcgcaagtcatca
gcttgcgtcgattacgtccctgccctttgtacacaccgcccgtcgctactaccgattgag
tgcattagtgaggacctcggattgaaatcattgt-g--c-t------------gcaaagt
ac-------tatg-attttgaa-aagt-ggttcaaat-ttgtgcatttagagatag--t-
aaaagtcgtaacaaggtt-tccgtag----------------------------------
------------------------------------------------------------
------------------------------------------------------------
------------------------------------------------------------
------------------------------------------------------------
------------------------------------------------------------
-----------
>KC529428_Cilionema_hawaiiensis
------------------------------------------------------------
-----------gatcctgccagtaattat-atgcttgtctcaaagattaag-ccatgcat
gtataagtacaca-cc-t-ttat-acggtgagaccgcg-aatggctcattaaatcagcta
ttatttcttagatctta-caaa--attacttgg--ataactgtagtaattcta-gagcta
ataca-tgaa--a--c-agtgcctcagtctt-t----------gactgtgtgc-ggattt
attag-aaca--aaacca-ac-cgg---c-------ctc-----------g-g--c-cg-
t-ctg------------------tttgg-tg-actctggataac-tt-ac--ctgatcgc
atag-cc--ttgagctggcgacgtatc-tttcaagtgtctgccctatca-actgacgttg
gtgagttacatgctca-ccatggtgataacgggtaacggggaatcagggttcgataccgg
agagggag-ccttagaaacggctaccacatctaaggaaggcagcaggcgcgcaaattacc
cactctcagct----agaggaggtagtga-cgataaataacaatgcaggactc-actacg
aggctctgcaattggaatgagtacaa-tctaaatcc-ttt-aacgagtaccaattgg-ag
ggcaag-tctggtgccagcagccgcggtaattccagct-ccaatagcgtatattaaaatt
gttgcagttaaaaagctcgtagttggatctcaggta-ag-------gtgtg-tcgg-tgt
ggtc-tat----gacca-t---------ctctgtg-cgc--atctgcctttca-------
-t---agccgtttgtctctctatggttctctttactgagtgctg--ta-gagtgctcggc
acgtttaccttgaaaaaatcagagtgcttaaagcaggcct--t--tgtgcttgaatgg-t
gt-tgcatggaataatggaataggacttc---ggt-tct-attttgtt-g-gttttc-gg
t-a------cc-gaagtaa-tgaacaatagagacag-acgggggcatttctatggctgtg
ttagaggtga---aattctgagatcgcagccagagaaac-tactgcgaaagcatttgcca
agcatgtcttcattaatcaagaacgaaagtcagaggttcgaagacgatcagataccgt-c
ctagttctgaccttaaacgatgccgaccgata-atcaggggtgg-tta---tatttctat
tgaccctcctggctg-t-ctct-gggaaacc-tcaagta---gggttctggggggaatat
ggt-cacaaggccgaaacttaaaggaattgacggaagggcaccaccaggagtggagcctg
cggcttaatttgactcaacacggggaaactcacccggtccggacactgttaggatggaca
gat--tgatagctctttcttgattcagtgggtggtggtgcatggccgttcttagttggtg
gagtgatttgtctggttaa--ttccgataacgaacgagactctgtcctgc-taactag--
---tcca--gtggcatcgg--------------tct-c-----------c-cccggagac
taaa-gctgct-gca--gac-ttcttagagggattcg-cggta------ttta-agccgc
acgaaa-tagagcaataacaggtctgtgatgccctta-gatgtccggggccgcac-----
----------------------------------gcgcg-ctacaatgacagtatcaaca
agtattc-ccacctggtctgaaa-agattgggaaatctt--tgaattactgtctccacag
ggattgaggtttgcaactatccctcatgaacgaggaattcccagtaggcgcaagtcatca
gcttgcgtcgattacgtccctgccctttgtacacaccgcccgtcgctactaccgattgag
tggattagtgaggccctcggattgtggactttgt-g--a-c------------gtaagtc
ac-------atcg-atcgcgaa-aagt-gggtcaaac-ttgttcatttagaggaag--t-
aaaagtcgtaacaaggtt-tccgtaggtgaacctgc-aga-tggatca------------
------------------------------------------------------------
------------------------------------------------------------
------------------------------------------------------------
------------------------------------------------------------
------------------------------------------------------------
-----------
>KC529427_Coronhelmis_multispinosus
------------------------------------------------------------
-------------tcctgccagtaattat-atgcttgtctcaaagattaag-ccatgcat
gtataagtacaca-cc-t-ttat-acggtgagaccgcg-aatggctcattaaatcagcta
ttatttcttagatctta-caca--attacttgg--ataactgtagtaattcta-gagcta
ataca-tgaa--a--c-agtgcctcagtctc-t----------gattgggtgc-ggattt
attag-aaca--aaacca-ac-cgg---c-------ttc-----------g-g--t-cg-
c-atg------------------tttgg-tg-actctggataac-tt-tc--ctgatcgc
atgg-cc--ttgagccggcgacgtatc-tttcaagtgtctgccctatca-actgacgttg
gtgagttacatgctca-ccatggtgataacgggtaacggggaatcagggttcgataccgg
agagggag-ccttagaaacggctaccacatctaaggaaggcagcaggcgcgcaaattacc
cactctcagct----agaggaggtagtga-cgataaataacaatgcaggactc-attacg
aggctctgcaattggaatgagtacaa-tttaaatcc-ttt-aacgagtaccaattgg-ag
ggcaag-tctggtgccagcagccgcggtaattccagct-ccaatagcgtatattaaaatt
gttgcagttaaaaagctcgtagttggatctcaggta-ag-------gtgtg-tcgg-tgt
ggtc-tat----gatca-t---------ttccgtt-cgc--atctgcctttca-------
-t---agccgtttgtctctctgtggttctctttactgagtgctg--ca-gggtgctcggc
acgtttaccttgaaaaaatcagagtgcttaaagcaggcct--t--tgtgcttgaatgc-t
gt-tgcatggaataatggaataggacttc---ggt-tct-attttgtt-g-gttttc-gg
t-a------cc-gaagtaa-tgaacaatagagacag-acgggggcatttctatggctgtg
ttagaggtga---aattctgagatcgcagccagagaaac-tactgcgaaagcatttgcca
agcatgtcttcattaatcaagaacgaaagtcagaggttcgaagacgatcagataccgt-c
ctagttctgaccttaaacgatgccgaccgata-atcaggggtgg-ttt---tttttttat
tgaccctcctggctg-t-ctct-gggaaacc-tcaagta---tggttctggggggattat
ggt-cacaaggctgaaacttaaaggaattgacggaagggcaccaccaggagtggagcctg
cggcttaatttgactcaacacggggaaactcacccggtccggacactgttaggatggaca
gat--tgatagctctttcttgattcagtgggtggtggtgcatggccgttcttagttggtg
gagtgatttgtctggttaa--ttccgataacgaacgagactctgtcctgc-taactag--
---tcca--gtggcatcgg--------------cta-c-----------c-tcgtgtggc
taca-gctgct-gca--gac-ttcttagagggattcg-cggta------ttta-agccgc
acgaaa-tagagcaataacaggtctgtgatgccctta-gatgtccggggccgcac-----
----------------------------------gcgcg-ctacattgacagtatcaaca
agtattt-acacctggtctgaaa-agattgggaaatctt--tgaattactgtctccacag
ggattgaggtttgcaactatccctcatgaacgaggaattcccagtaggcgcaagtcatca
gcttgcgtcgattacgtccctgccctttgtacacaccgcccgtcgctactaccgattgag
tggattagtgaggccctcggattgaggactttgt-g--g-c------------gtaagtc
ac-------atcg-ttttcgaa-aagt-gggtcaaac-ttgttcatttagaggaag--t-
aaaagtcgtaacaaggtt-tccgtaggtgaacctgc-aga-tggatc-------------
------------------------------------------------------------
------------------------------------------------------------
------------------------------------------------------------
------------------------------------------------------------
------------------------------------------------------------
-----------
>KC529426_Coronhelmis_lutheri
------------------------------------------------------------
-----------gatcctgccagtaattat-atgcttgtctcaaagattaag-ccatgcat
gtataagtacaca-cc-t-ttat-acggtgagaccgcg-aatggctcattaaatcagcta
ttatttcttagatctta-caca--attacttgg--ataactgtagtaattcta-gagcta
ataca-tgaa--a--g-agtgcctcagtctc-t----------gattgggtgc-ggattt
attag-aaca--aaacca-ac-cgg---t-------ctc-----------g-g--c-cg-
c-atg------------------tttgg-tg-actctggataac-tt-ac--ctgatcgc
atgg-cc--ttgagccggcgacgtatc-tttcaagtgtctgccctatca-actgacgttg
gtgagttacatgctca-ccatggtgataacgggtaacggggaatcagggttcgacaccgg
agagggag-ccttagaaacggctaccacatctaaggaaggcagcaggcgcgcaaattacc
cactctcagtt----cgaggaggtagtga-cgataaataacaatgcaggactc-attacg
aggctctgcaattggaatgagtacaa-tttaaatcc-ttt-aacgagtaccaattgg-ag
ggcaag-tctggtgccagcagccgcggtaattccagct-ccaatagcgtatattaaaatt
gttgcagttaaaaagctcgtagttggatctcaggta-ag-------gtgtg-tcgg-tgt
ggtc-tat----gatca-t---------ttccgtt-cgc--atctgcctttca-------
-t---agccgtttgtctctctatggttctctttactgagtgctg--ta-gggtgctcggc
acgtttaccttgaaaaaatcagagtgcttaaagcaggcct--t--tgtgcctgaatgt-t
gt-tgcatggaataatggaataggacttc---ggt-tct-attttgtt-g-gttttt-gg
t-a------cc-gaagtaa-tgaacaatagagacag-acgggggcatttctatggctgtg
ttagaggtga---aattctgagatcgcagccagagaaac-tactgcgaaagcatttgcca
agcatgtcttcattaatcaagaacgaaagtcagaggttcgaagacgatcagataccgt-c
ctagttctgaccttaaacgatgccgaccgata-atcaggggtgg-ttt---tttttttat
tgaccctcctggctg-t-ctct-gggaaacc-tcaagta---tggttctggggggattat
ggt-cacaaggctgaaacttaaaggaattgacggaagggcaccaccaggagtggagcctg
cggcttaatttgactcaacacggggaaactcacccggtccggacactgttaggatggaca
gat--tgatagctctttcttgattcagtgggtggtggtgcatggccgttcttagttggtg
gagtgatttgtctggttaa--ttccgataacgaacgagactctgtcctgc-taactag--
---tcca--gtggcatcgg--------------ctg-c-----------c-ttgtgtagc
taca-gctgct-gca--gac-ttcttagagggattcg-cggta------ttta-agccgc
acgaaa-tagagcaataacaggtctgtgatgccctta-gatgtccggggccgcac-----
----------------------------------gcgcg-ctacattgacagtatcaaca
agtattt-acacctggtctgaaa-agattgggaaatctt--tgaattactgtctccacag
ggattgaggtttgcaactatccctcatgaacgaggaattcccagtaggcgcaagtcatca
gcttgcgtcgattacgtccctgccctttgtacacaccgcccgtcgctactaccgattgag
tggattagtgaggccctcggattgaggactttgt-g--g-c------------gaaagtc
ac-------atcg-ttttcgaa-aagt-gggtcaaac-ttgttcatttagaggaag--t-
aaaagtcgtaacaaggtt-tccgtaggtgaacctgc-aga-tggat--------------
------------------------------------------------------------
------------------------------------------------------------
------------------------------------------------------------
------------------------------------------------------------
------------------------------------------------------------
-----------
>KC529425_Kymocarens_sp_NVS2013
------------------------------------------------------------
---ctg-gtt-gatcctgccagtaattat-atgcttgtctcaaagattaag-ccatgcat
gtatcagttcatg-tc-c-tagt-acgacgaaaccgcg-aatggctcattaaatcagcta
ttatttcttggatctta-caca--attacttgg--ataactgtagtaattcta-gagcta
ataca-tgac--a--a-tgtgccacagcgct-t-------g--cgctgtgtgc-gaattt
attag-atca--aaacca-ac-cag---c-------ttc-----------g-g--c-tg-
c-ttg------------------tttgt-ta-actctggataac-tg-ac--ctgatcgc
atga-cc--ttgtgtcggcgacgtatc-tttcaagtgtctgccctatca-actgacgttg
gtagtgtaaatgacta-ccatggttgtgacgggtaacggggaatcagggttcgataccgg
agagggag-ccttagaaacggctaccacatctaaggaaggcagcaggcgcgcaaattacc
cactctcagtt----cgaggaggtagtga-cgaaaaataacgatatggaactc-attacg
aggctccataattggaatgagtacag-tgtaaaaaa-ctt-aacgagtaccaattgg-ag
ggcaag-tctggtgccagcagccgcggtaattccagct-ccaatagcgtatattaaattt
gttgcgtttaaaaagctcgtagttggatctcaggtt-ga-------gtttg-gcgg-act
gggc-ttt----gttct-a---------tgctccgtcat--accgacctttca-------
-t---agccgtttgttgccctatggtgctcttcactgagcgccgt-at-gggtactcggc
acgtttaccttgaaaaaatcagagtgctcaaagcaggcct--t--cgtgcttgtatat-t
gt-tgcatggaataatggaacaggacttc---ggt-act-attttgtt-gtgttttg-ag
t-g------cc-gaagtaa-tgaataatagagacag-acgggggcatttgtatgccggtg
ttagaggtga---aattctgagatcgccggcagacaaac-tactgcgaaagcatttgcca
agtatgtcttcattaatcaagaacgaaagtcggaggttcgaaaacgattagataccgt-t
gtagttccgaccataaactatgtcaacatata-atcgggggtgg-tta---tatttctat
tgaccctcccggcta-t-accc-gggaaa-c-ctaagtt---ggattccggggggaatat
ggt-cccaaggccgaaacttaaaggaattgacggaagggcaccaccaggagtggagcctg
cggcttaatttgactcaacacggggaatctcacccggtccggacactgttaggatggaca
gat--tgacagctctttcttgattcagtgggtggtggtgcatggccgttcttagttggtg
gagtgatttgtctggttaa--ttccgataacgaacgagactctgtcctgc-taactag--
---tcca--ctagcattgg--------------tcact-------tgcgt--------ga
caca-gctatt-gct--gac-ttcttagagggattcg-cgga-------ttca-acccgc
acgaaa-tggagcaataacaggtctgtgatgccctta-gatgtccggggccgcac-----
----------------------------------gcgcg-ctacattgacagtaacagcg
agtattt-ccacctggtctgaaa-agattgggaaatctt--cgaattactgtctccacag
ggattgaggtttgcaattatccctcatgaacgaggaattcccagtaggcgcaagtcatca
gcttgcgtcgattacgtccctgccctttgtacacaccgcccgtcgctactaccgattgga
tgggttagtgaggacctcggattgagaactttgt-g--a-cg-----------taaagtc
at-------attg-tgctcgaa-aagt-ggttcgaac-ttgtctatctagaggaag--t-
aaaagtcgtaacaaggtt-tccgtaggtgaacctgc-aga-tggatca------------
------------------------------------------------------------
------------------------------------------------------------
------------------------------------------------------------
------------------------------------------------------------
------------------------------------------------------------
-----------
>KC529424_Brinkmanniella_palmata
------------------------------------------------------------
---------------ctgccagtaattat-atgcttgtctcaaagattaag-ccatgcaa
gtcttagttcaca-cc-t-tcaa-acggtgaaaccgcg-aatggctcattaaatcagcta
taatttcttggatctta-aagt----tacttgg--ataactgtagtaattcta-gagcta
ataca------tg--aaactgcacccattattg--------------ggtagc-gaaatt
attag-aaca--agacca-acccg----c-------ttcg--------gcg-gtac----
-----------------------tttgg-tg-actctggataac-tt-tc--ttgatcgc
atga-ct--ttatgtcggcgacgcatc-tttcaagtggctgacctatca-act--tgatg
gtgagttaaatgctca-ccatggttgtaacgggtaacggggaatcagggttcgattccgg
agagggag-ccttagaaacggctaccacatccaaggaaggcagcaggcgcgcaaattacc
cactctcagca----agaggaggtagtga-cgataaataacaatgcgggactc-aatacg
aggcttcgcaattggaatgagaacag-aataaaact-ctt-atcgagtatcaatcag-ag
ggcaag-tctggtgccagcagccgcggtaattccagct-ctgatagcgtatattaaagtt
gctgcagttaaaaagctcgtagttggatctcaggtt-tg-------ataca-gcag-tgc
agcttca----tggttg-t---------tactgtc-agt-g-tctgcctttca-gtgcca
gta--agccccatg----------gtgagcttaactgtttgcct--tggtggaaattggc
aagtttaccttgaaaaaatcagagtgcttaaagcaggcct--t--tgtgcttgtatga-t
gg-tgcatggaataatagaataggacttt---gat-cct-attttgtt-g-gtcttc-gg
g-a------cc-agagtaa-tgataaatagagactg-tggggggccttcgtagtgcagtg
atagaggtga---aattctgagaccattgcacgacgaac-aactgcgaaagcattggcct
actatgtcttcattaatcaagaacgaaagtcagaggttcgaagacgattagataccgt-c
ctagttctgaccataaacgatgccaatcagtg-cttacgggtag-tt----tacatttat
tgctactcgtaggcg-c-ccct-gggaaacc-tcaaatt----ggttctggggggaatat
ggt-ctcaaggccgaaacttaaaggaattgacggaagggcaccaccaggagtggagcctg
cggcttaatttgactcaacacggggaatctcacccggtccggacactagaatgatagaca
gat--tgatagctctttcttgatttggtgtatggtggtgcatggccgttcttagttggtg
gagtgatttgtctggttaa--ttccgataacgaacgagactctgtcctgc-taaatag--
---tctg--atagcatgga--------------ttgtttt--------atcaatcttggc
aatt--------att--gac-ttcttagagggattcg------cgcaatatta-acgcgc
acgaaa-tagagcaataacaggtctgtgatgccctta-gatgtccggggccgcac-----
----------------------------------gcgcg-ctacattgacaatgacaaaa
agtatta-caacctggtctgaaa-ggattgggaaatctt--tgaatcattgtctccacag
ggattgaggtttgcaattatccctcatgaacgaggaattcctagtaggcgcaagtcatca
gcttgcgtcgactaagtccctgccctttgtacacaccgcccgtcgctactaccgattgag
tggtttagtgaggagcttggactgaattttcggaggctg--------------caaggtc
tctgaa--------tttttgga-aagc-gcttcaaac-tgtgctacttagaggaag--t-
aaaagtcgtaacaaggtt-tctgtaggtgaacctgc-ag---------------------
------------------------------------------------------------
------------------------------------------------------------
------------------------------------------------------------
------------------------------------------------------------
------------------------------------------------------------
-----------
>KC529423_Microvahine_corallicola
------------------------------------------------------------
------------------------------------------------------------
---------------------------------ccgcg-aatggctcattaaatcagata
ttatttcttagatctta-caaa--attgcttgg--ataactgtagtaattcta-gagcta
ataca-ttac--a--t-agtgcttcagtgat-a-------t--cgctgaatgc-gaattt
attagaacaa--aaacca-ac-cac---c-------ttc-----------t-g--g-tg-
a-ata------------------tttgg-ta-actctgaataac-tt-at--ctgatcgc
atga-cc--ttgtgtcggcgacgtatc-tttcaagtatctgccctatca-actttcgatg
gtaagttaaatgctta-ccatggttataacgggtaacggggaatcagcgttcgattccgg
agagggag-cctaagaaacggctaccacatctaaggaaggcagcaggcgcgcaaattatc
cattcccagat----cggggagatagtga-cgaaaaataacattgctgaactc-a-tatg
aggcttagcaaatgcaatgaatacaa-tttaaatcc-ttt-aatgagtatctattgg-ag
ggcaag-tctggtgccagcagccgcggtaattccagct-ccaatagcgtatattaaattt
gttgcagttaaaaagctcgtagttggatctcaggtt-tg-------atatg-acgg-ttt
gttctttg----taaca-a---------tactgta-aat--atcagcctttta-------
-t---agttgtatgccgctctatggtggtctttattgattgcta--tatgagtgcacgac
acgtttaccttgaaaaaatcagagtgatcaatgcaggca---t--aaagcttgaatgt-t
ca-tgcaaggaataatggaataggacctt---ggt-tct-attttgtt-g-gttttc-ag
a-t------ct-aaggtaa-tgaataatagagacag-tcgggggtatttgtatggtggcg
ttagaggtga---aattctgagatcgttgccagacaaac-tactgcgaaagcatttaccc
agtatgtcctcattaatcaagaacgaaagtcagaggttcgaagacgatcagataccgt-c
ctagttctgaccataaacgatgttgactaata-atttcagtcgg-tt------ttttttt
tgactactgaagcta-t-ctcc-aggaaact-t-taatt---caattctggggggattat
agt-ctcaaggccaaaacttaaaggaattgacggaagggcaccaccaggtgtggagcttg
cggcttaatttgactcaacacggggaatctcacccggtccggacactgtaacgatagaca
gat--tgatagctctttcttgattcagtggttggtggtgcatggccgttcttagttggtg
gagtgatttgtctggttaa--ttccgataacgaacgagactctatcctgc-taaatag--
---ttca--gtggcatcag--------------ttgtttt---------------acaac
taca-gctact-aga--tac-ttcttagagggattgg-tgaa-------ttta-aatcac
acgaaa-gagagcaataacaggtctgtgatgccctta-gatgtccggggccgcac-----
----------------------------------gcgtg-ctacattgacagtaacaaag
agtatta-ccaccaaggtcagaaatgactgggaaatctt--tgaattattgtctccacag
ggattgaggtttgcaattttgcctcatgaacgaggaatacctagtaggcgcaggtcatca
gcctgtgccgattatgtccctgccctttgtacacaccgcccgtcgctactaccgattgag
tggattagtgaggatatcggattgaataattgtt-g--g-tgaaa--------gctaata
at------------tgttcgag-aagt-tattcaaac-ttgttcatttagagatag--t-
aaaagtcgtaacaaggtt-tccgtaggtgaacctgc------------------------
------------------------------------------------------------
------------------------------------------------------------
------------------------------------------------------------
------------------------------------------------------------
------------------------------------------------------------
-----------
>KC529422_Ceratopera_gracilis
------------------------------------------------------------
------------------ccagtaattat-atgcttgtctcaaagattaag-ccatgcat
gtatcagtacaca-cc-t-taat-acggtgagaccgcg-aatggctcattaaatcagcta
ttatttcttagatctta-caca--attacttgg--ataactgtagtaattcta-gagcta
ataca-cgtc--a--a-tgtgccacagtcat-c----------gactgtgtgc-ggattt
attag-aaca--aaacca-ac-cgg---c-------ttc-----------g-g--c-cg-
t-ttc------------------attgg-tg-actctggataac-tt-ac--ctgatcgc
atgg-cc--ttgagccggcgacatatc-tttcaagtgtctgccctatca-actgacgttg
gtgagttatttgctca-ccatggtgttaacgggtaacggggaatcagggttcgataccgg
agagggag-ccttagaaatggctaccacatctaaggaaggcagcaggcgcgcaaattacc
cactctcagct----cgaggaggtagtga-cgataaataacaatgcaggactc-aatctg
aggctctgcaattggaatgagtacaa-tgtaaaaac-ttt-aacgagtaccaattgg-ag
ggcaag-tctggtgccagcagccgcggtaattccagct-ccaatagcgtatattaaattt
gttgcagttaaaaagctcgtagttggattccaggta-ag-------gtgtg-tcgg-tat
ggtc-tat----gatca-t---------ctccgtt-cat--atctgccttttt-------
-t---agctgtatgtctctttatggttctcttcattgagtgcta--tt-aagggctcggc
acgtttaccttgaaaaaatcagagtgctccaagcaggcct--t--tgtgcttgaatgt-t
gt-tgcatggaataatggaataggacttc---ggt-tct-attttgtt-g-gttttc-gg
t-a------tc-gaagtaa-tgaacaatagagacag-tcgggggcattcgtatggctgtg
ttagaggtga---aattctgagatcgcagccagacgaac-tactgcgaaagcatttgcca
agcatgtcttcattaatcaagaacgaaagtcagaggttcgaagacgatcagataccgt-c
ctagttctgaccgtaaacgatgccgaccgata-atcaggggtgg-tta---tatttgcat
taatcctcctggctg-t-ccct-gggaaa-c-cttagtc---aggttctggggggattat
ggt-cacaaggttggaacttaaaggaattgacggaagggcaccaccaggagtggagcctg
cggcttaatttgactcaacacgggaaaactcacccggtccggacactgttaggatggaca
gat--tgatagctctttcttgattcagtgggtggtggtgcatggccgttcttagttggtg
gagtgatttgtctggttaa--ttccgataacgaacgagactctgtcctgc-taaatag--
---tcca--gtggcatcgg--------------cggac-----------t-ct-gtctgc
taca-gctact-gct--gac-ttcttagagggattcg-cggttc-----atta-agccgc
acgaaa-tagagcaataacaggtctgtgatgccctta-gatgtccggggccgcac-----
----------------------------------gcgcg-ctacattgacagtattagca
agtattt-ccacctggtctgaga-agatcgggaaatctt--tgaattactgtctccacag
ggattgaggtttgcaactatccctcatgaacgaggaattcccagtaggcgcaagtcatca
gcttgcgtcgattacgtccctgccctttgtacacaccgcccgtcgctactaccgattgag
tggattagtgaggccctcggattgaggacatggc-g--g-c------------gttagcc
gt-------tttg-tctttgaa-aagt-gggtcaaac-ttgttcatttagaggaag--t-
aaaagtcgtaacaaggtt-tccgtaggtga------------------------------
------------------------------------------------------------
------------------------------------------------------------
------------------------------------------------------------
------------------------------------------------------------
------------------------------------------------------------
-----------
>KC529421_Ceratopera_sp_NVS2013
------------------------------------------------------------
--------------cctgccagtaattat-atgcttgtctcaaagattaag-ccatgcat
gtataagtacaca-cc-t-ttat-acggtgagaccgcg-aatggctcattaaatcagcta
ttatttcttagatctta-caca--attacttgg--ataactgtagtaattcta-gagcta
ataca-tgtc--a--a-tgtgcggcagtctt------------gactgtttgc-ggattt
attag-aaca--aaacca-ac-cgc---c-------ttc-----------g-g--g-cg-
t-tga------------------tttga-ag-actctggataac-tg-ac--ctgatcgc
atgg-cc--ttgagccggcgacgtatc-tttcaagtgtctgccctatca-actgacgttg
gtgagatatttgctca-ccatggtgttaacgggtaacggggaatcagggttcgataccgg
agagggag-ccttagaaatggctaccacatctaaggaaggcagcaggcgcgcaaattacc
cactctcagca----cgaggaggtagtga-cgataaataacaatgcaggactc-aaactg
aggctctgcaattggaatgagtacaa-tttaaatcc-ttt-aacgagtaccaattgg-ag
ggcaag-tctggtgccagcagccgcggtaattccagct-ccaatagcgtatattaaaatt
gttgcagttaaaaagctcgtagttggacgtcaggta-ag-------gtatt-tcgg-aat
ggtc-tat----gatca-t---------ctccgtt-cat--atctgccttttt-------
-t---agctgtatgtctttctatggttctcttcattgagtgcta--ta-gagagctcagc
acgtttaccttgaaaaaatcagagtgctcaaagcaggcct--t--tgtgcttgaatgt-t
gt-tgcatggaataatggaataggacttc---ggt-tct-attttgtt-g-gttttc-gg
a-a------tc-gaagtaa-tgaacaatagagacag-tcgggggcatccgtatggctgtg
ttagaggtga---aattctgagatcgcagccagacgaac-tactgcgaaagcatttgcca
agcatgtcttcattaatcaagaacgaaagtcagaggttcgaagacgatcagataccgt-c
ctagttctgaccttaaacgatgccgaccgata-atcaggggtgg-tta---tatttgcat
taatcctcctggctg-t-ccct-gggaaa-c-cttagtc---tggttctggggggattat
ggt-cacaaggttggaacttaaaggaattgacggaagggcaccaccaggagtggagcctg
cggcttaatttgactcaacacggggaatctcacccggtccggacactgttaggatggaca
gat--tgatagctctttcttgattcagtgggtggtggtgcatggccgttcttagttggtg
gagtgatttgtctggttaa--ttccgataacgaacgagactctgtcctgc-taaatag--
---tcca--gtggcatcgg--------------ctgac-----------t-catgtcggc
taca-gctgct-gct--gac-ttcttagagggattcg-cggttc-----ctta-agccgc
acgaaa-tagagcaataacaggtctgtgatgccctta-gatgtccggggccgcac-----
----------------------------------gcgcg-ctacattgacagtatcaaca
agtatta-tcaccttgtcttaaa-agatcggggaatctt--tgaattactgtctccacag
ggattgaggtttgcaactattcctcatgaacgaggaattcccagtaggcgcaagtcatca
gcttgcgtcgattacgtccctgccctttgtacacaccgcccgtcgctactaccgattgag
tggattagtgaggccctcggattgaggccttggt-g--a-c------------gtcagtt
ac-------tttg-gctttgaa-aagt-gggtcaaac-ttgttcatttagaggaag--t-
aaaagtcgtaacaaggtt-tccgtaggtgaacctgc-aga-tggatcaa-----------
------------------------------------------------------------
------------------------------------------------------------
------------------------------------------------------------
------------------------------------------------------------
------------------------------------------------------------
-----------
>KC529420_Ptychopera_sp_NVS2013
------------------------------------------------------------
-----------gatcctgccagtaattat-atgcttgtctcaaagattaag-ccatgcat
gtataagtacaca-cc-t-ttat-acggtgagaccgcg-aatggctcattaaatcagcta
ttatttcttagatctta-caca--tttacttgg--ataactgtagtaattcta-gagcta
ataca-tgtc--a--c-tgtgccacaacttt-a-------c--cgttgtgtgc-ggattt
attag-aaca--agacca-ac-cgg---t-------ttc-----------g-g--c-cg-
t-cg-------------------tttgg-tg-actctggataac-tt-ac--ctgatcgc
atgg-cc--ttgagccggcgacgtatc-tttcaagtgtctgccctatca-actgacgttg
gtgaggtatttgctca-ccatggtgttgacgggtaacggggaatcagggttcgattccgg
agagggag-ccttagaaacggctaccacatctaaggaaggcagcaggcgcgcaaattacc
cactctcagaa----tgaggaggtagtga-caataaataacaatgcaggactc-atattg
aggctctgcaattggaatgagtacaa-tctaaacac-ttt-aacgagtaccaattgg-ag
ggcaag-tctggtgccagcagccgcggtaattccagct-ccaatagcgtatattaaattt
gttgcagttaaaaagctcgtagttggatctaaggtg-ag-------gtgtg-tcgg-tgt
gttc-aat----gaaca-c---------caccgtt-cat--gtctgccttttt-------
-c---agttgtatgtcctctaacggttctcttaactgagtgctg--ta-tgaggctcgac
acgtttaccttgaaaaaatcagagtgctcaaagcaggcct--t--tgcgcttgtatgt-t
gt-tgcatggaataatggaataggacttc---ggt-tct-attttgtt-g-gttttc-gg
t-a------cc-ggagtaa-tgaacaatagagacag-tcgggggcatttctatggctgtg
atagaggtga---aattctgagaccgcagccagagaaac-tactgcgaaagcatttgcca
agtatgtcttcattaatcaagaacgaaagtcagaggttcgaagacgatcagataccgt-c
ctagttctgaccttaaacgatgccgtccgata-atcaggagtgg-tta----tatttaat
taatcctcctggctg-t-ccct-gggaaa-c-cttagat---aggttctggggggaatat
ggt-cgcaaggttggaacttaaaggaattgacggaagggcaccaccaggagtggagcctg
cggcttaatttgactcaacacggggaaactcacccggtccggacactgtgaggattgaca
gat--tgatagctctttcttgattcagtgggtggtggtgcatggccgttcttagttggtg
gagtgatttgtctggttaa--ttccgataacgaacgagactctatcctgc-taaatag--
---tttg--atagcatcgg--------------tcacc-------------tc--gtgac
taca-gctact-a-a--aac-ttcttagagggattcg-cggta------ttta-aaccgc
acgaaa-gagagcaataacaggtctgtgatgccctta-gatgtccggggccgcac-----
----------------------------------gcgcg-ctacattgacagtatcagaa
agtaata-ccacctggtccgaga-ggattgggaaatctt--tgaattactgtctccacag
ggattgaggtttgtaattatccctcatgaacgaggaattcccagtaggcgtaagtcatca
gcttacgtcgattacgtccctgccctttgtacacaccgcccgtcgctactaccgattgag
tggattagtgaggctctcggattgaggttttggt-g--g-c------------gaaagtc
ac-------taaa-attttgaa-aagt-gagtcaaac-ttgttcatttagaggaag--t-
aaaagtcgtaacaaggtt-tccgtaggtgaacctgc-aga-tggatcaa-----------
------------------------------------------------------------
------------------------------------------------------------
------------------------------------------------------------
------------------------------------------------------------
------------------------------------------------------------
-----------
>KC529419_Trigonostomum_armatum
------------------------------------------------------------
----------------tgccagtaattat-atgcttgtctcaaagattaag-ccatgcat
gtataagtacaca-cc-t-ttaa-acggtgagaccgcg-aatggctcattaaatcagcta
ttatttcttggatctta-taaa--tttacttgg--ataactgtagtaattcta-gagcta
ataca-tttc--a--c-aatgcctcagtctt-t-------acagattgtgtgc-ggattt
attag-aaca--aaatca-ac-cag---t-------ttc-----------g-g--c-tg-
t-ctct-----------------tttgt-ta-actctggataac-tt-ac--ctgatcgc
atgg-cc--ttgagccggcgacgtatc-tttcaagtggctgacctatca-actgacgttg
gtgagttaaatgctca-ccatggtgttgacgggtaacggggaatcagggttcgattccgg
agagggag-ccttagaaacggctaccacatctaaggaaggcagcaggcgcgcaaattacc
cactctcagct----agaggaggtagtga-cgataaataacaatgcaggactc-attatg
aggctctgcaattggaatgagtacaa-tttaaatct-ctt-aacgagtaccaattgg-ag
ggcaag-tctggtgccagcagccgcggtaattccagct-ccaatagcgtatattaaattt
gttgaagttaaaaagctcgtagttggatctcaggta-ag-------gtgtg-tcgg-tct
ggac-tat----gtcca-t---------ctccgtt-cat--atctgccttttt-------
-t---agttgtatgtcaatccatggttgtcttcattgattgctg--tg-gagagctcaac
acgtttaccttgaaaaaatcagagtgcttaaagcaggcct--t--tgtgcttgtatgt-t
gt-tgcatggaataatggaacaggacttc---gga-att-attttgtt-g-atttca-ac
t-t------ct-gaagtaa-tgaacaatagagacag-tcgggggcatttctatggctgtg
ttagaggtga---aattctgagatcgcagccagagaaac-tattgcgaaagcatttgcca
agtatgtcttcattaatcaagaacgaaagtcagaggttcgaagacgatcagataccgt-c
ctagttctgaccttaaacgatgccgaccgata-atcggaggtgg-tta---tttttttat
taactcttccggctg-t-ccct-gggaaa-c-cttagta---aggttcttgggggattat
ggt-cgcaagggcgaaacttaaaggaattgacggaagggcaccaccaggagtggagcctg
cggcttaatttgactcaacacggggaatctcacccggtccggacactgttaggatggaca
gat--tgatagctctttcttgattcagtgggtggtggtgcatggccgttcttagttggtg
gagtgatttgtctggttaa--ttccgataacgaacgagactctgtcctgc-taaatag--
---ttca--gtggcatcgg--------------ctgcc----------tt-cttggtggc
taca-gcttct-gca--aac-ttcttagaggaattcg-cggtac-----ttta-agccgc
acgaaa-tagagcaataacaggtctgtgatgccctta-gatgtccggggccgcac-----
----------------------------------gcgcg-ctacattgacagtatcagca
agtattt-ccacctggtctgaga-agatcgggaaatctt--tgaattactgtctccacag
ggattgaggtttgcaactatccctcatgaacgaggaattcctagtaggcgcaagtcatca
gcttgcgtcgattatgtccctgccctttgtacacaccgcccgtcgctactaccgattgag
tggattagtgaggccctcggatttagaactttgt-g--a-t------------gcaagtc
ac-------tttg-ttttggaa-aagt-gggtcaaac-ttgttcatttagaggaag--t-
aaaagtcgtaacaaggtt-tccgtaggtgaacctgc-aga-tggat--------------
------------------------------------------------------------
------------------------------------------------------------
------------------------------------------------------------
------------------------------------------------------------
------------------------------------------------------------
-----------
>KC529418_Trigonostomum_setigerum
------------------------------------------------------------
------------------------------------------------------------
-------------------------------------g-aatggctcattaaatcagcta
ttatttcttggatctta-taaa--tttacttgg--ataactgtagtaattcta-gagcta
ataca-tgtc--a--a-tatgcctcagtcct-t-------acagactgtgtgc-ggattt
attag-aaca--aaatca-ac-cgg---c-------ttc-----------g-g--c-cg-
t-ctct-----------------tttgt-ta-actctggataac-tt-ac--ctgatcgc
atgg-cc--ttgagccggcgacgtatc-tttcaagtggctgacctatca-actgacgttg
gtgagttaaatgctca-ccatggtgttgacgggtaacggggaatcagggttcgattccgg
agagggag-ccttagaaacggctaccacatctaaggaaggcagcaggcgcgcaaattacc
cactctcagct----cgaggaggtagtga-cgataaataacaatgcaggactc-attatg
aggctctgcaattggaatgagtacaa-tttaaatct-ctt-aacgagtaccaattgg-ag
ggcaag-tctggtgccagcagccgcggtaattccagct-ccaatagcgtatattaaattt
gttgaagttaaaaagctcgtagttggatctcaggta-ag-------gtgtg-tcgg-tct
ggac-tat----gtcca-t---------ctccgtt-cat--atctgccttttt-------
-t---agttgtatgtcaattcatggttgtctttattgattgcta--tg-gaaagctcaac
acgtttaccttgaaaaaatcagagtgcttaaagcaggcct--t--tgtgcttgtatgt-t
gt-tgcatggaataatggaacaggacttc---gga-aat-attttgtt-g-atttca-ac
t-t------tc-gaagtaa-tgaacaatagagacag-tcgggggcatttctatggctgtg
ttagaggtga---aattctgagatcgcagccagagaaac-tattgcgaaagcatttgcca
agtatgtcttcattaatcaagaacgaaagtcagaggttcgaagacgatcagataccgt-c
ctagttctgaccttaaacgatgccgaccgata-atcagaggtgg-tta---tttttttat
taactcttctggctg-t-ccct-gggaaa-c-cttagtt---aggttcttgggggattat
ggt-cgcaagggcgaaacttaaaggaattgacggaagggcaccaccaggagtggagcctg
cggcttaatttgactcaacacggggaatctcacccggtccggacactgttaggatggaca
gat--tgatagctctttcttgattcagtgggtggtggtgcatggccgttcttagttggtg
gagtgatttgtctggttaa--ttccgataacgaacgagactctttcctgc-taaatag--
---ttca--tgggcatcgg--------------ctgcc-----------t-cacggtggc
taca-gctcgt-gca--aac-ttcttagaggaattcg-cggtac-----ttca-agccgc
acgaaa-tagagcaataacaggtctgtgatgccctta-gatgtccggggccgcac-----
----------------------------------gcgcg-ctacattgacagtatcaaca
agtattc-ccacctggtctgaga-agatcgggaaatctt--tgaattactgtctccacag
ggattgaggtttgcaactatccctcatgaacgaggaattcctagtaggcgcaagtcatca
gcttgcgtcgattatgtccctgccctttgtacacaccgcccgtcgctactaccgattgag
tggattagtgaggccctcggattgagaatttagt-g--g-c------------gcaagtc
ac-------tttg-tttttgaa-aagt-gggtcaaac-ttgttcatttagaggaag--t-
aaaagtcgtaacaaggtt-tccgtag----------------------------------
------------------------------------------------------------
------------------------------------------------------------
------------------------------------------------------------
------------------------------------------------------------
------------------------------------------------------------
-----------
>KC529417_Trigonostomum_venenosum
------------------------------------------------------------
-----------------gccagtaattat-atgcttgtctcaaagattaag-ccatgcat
gtataagtacaca-cc-t-ttat-acggtgagaccgcg-aatggctcattaaatcagcta
ttatttcttagatctta-ca-a--tttacttgg--ataactgtagtaattcta-gagcta
ataca-tttc--a--a-agtgctctg--tgt-c-------ta-acacagatgc-gtattt
attag-aaca--aaatca-ac-cga---c-------ttc-----------g-g--t-cg-
t-ctc------------------tttgt-aa-actctgaataac-tt-aa--cagatcgc
atgg-cc--ctgagccggcgacatatc-tttcaagtggctgacctatca-actgacgttg
gtgagttatttgctca-ccatggtgttgacgggtaacggggaatcagggttcgataccgg
agagggag-ccttagaaacggctaccacatctaaggaaggcagcaggcgcgcaaattacc
cactctcagct----agaggaggtagtga-cgataaataacaatgcaggactc-tttacg
aggctctgcaattggaatgagtacaa-tctaaatcc-ttt-aacgagtaccaattgg-ag
ggcaag-tctggtgccagcagccgcggtaattccagct-ccaatagcgtatattaaattt
gttgaagttaaaaagctcgtagttggatctcaggta-ag-------atgtg-tcgg-tgt
ggtc-aat----ggcca-t---------ctccgtt-cat--atctgccttttt-------
-t---agctgtttgtcttcttattgttctcttcattgagtgctt--ta-gggagctcggc
acgtttaccttgaaaaaatcagagtgcttaaagcaggcct--t--ggtgcttgtatgt-t
gt-tgcatggaataatggaataggacttc---ggt-tct-attttgtt-g-gttttc-gg
t-a------ct-gaagtaa-tgaataatagagacag-tcgggggcatttctatggctgtg
ttagaggtga---aattctgagatcgcagccagagaaac-tactgcgaaagcatttgcca
agcatgtcttcattaatcaagaacgaaagtcagaggttcgaagacgatcagataccgt-c
ctagttctgaccttaaacgatgccgaccgata-atcagaggtgg-tta---tatttttat
taatccttctggctg-t-ctct-gggaaacc-tttagtt---aggttcttgggggaatat
ggt-cgcaagggcgaaacttaaaggaattgacggaagggcaccaccaggagtggagcctg
cggcttaatttgactcaacacggggaaactcacccggtccggacactgttaggatggaca
gat--tgatagctctttcttgattcagtgggtggtggtgcatggccgttcttagttggtg
gagtgatttgtctggttaa--ttccgataacgaacgagactctgtcctgc-taaatag--
---ttca--gtggcatcgg--------------ttgcc-----------t-tatggtaac
taca-gcttct-gct--aac-ttcttagagggattcg-cggtac-----ttta-aaccgc
acgaaa-tagagcaataacaggtctgtgatgccctta-gatgtccggggccgcac-----
----------------------------------gcgcg-ctacattgacagtattaaca
agtaata-acacctggtctgaaa-agatcgggaaatctt--tgaattactgtctccacag
ggattgaggtttgtaactatccctcatgaacgaggaattcccagtaggcgcaagtcatca
gcttgcgtcgattacgtccctgccctttgtacacaccgcccgtcgctactaccgattgag
tggattagtgaggccctcggattgaagtttgagtgg--g-ga-----------tttcttc
at-------tctt-acattgaa-aagt-gggtcaaac-ttgttcatttagaggaag--t-
aaaagtcgtaacaaggtt-tccgtaggtgaacctgc-aga-tggatca------------
------------------------------------------------------------
------------------------------------------------------------
------------------------------------------------------------
------------------------------------------------------------
------------------------------------------------------------
-----------
>KC529416_Trigonostomum_franki
------------------------------------------------------------
------------------------------------------------------------
-----------------------------------cgg-aatggctcattaaatcagcta
ttatttcttggatctta-taaa--tttacttgg--ataactgtagtaattcta-gagcta
ataca-tgtc--a--a-tatgcctcagtcct-t-------acagactgtgtgc-ggattt
attag-aaca--aaatca-ac-cggt--c-------ttt-----------g-g--c-cg-
t-cttt-----------------tttgt-ta-actctggataac-tt-ac--ctgatcgc
atgg-cc--ttgagccggcgacgtgtc-cttcaagtggctgacctatca-actgacgttg
gtgagttaaatgctca-ccatggtgttgacgggtaacggggaatcagggttcgattccgg
agagggag-ccttagaaacggctaccacatctaaggaaggcagcaggcgcgcaaattacc
cactctcagtt----cgaggaggtagtga-cgataaataacaatgcaggactc-attatg
aggctctgcaattggaatgagtacaa-tttaaatct-ctt-aacgagtaccaattgg-ag
ggcaag-tctggtgccagcagccgcggtaattccagct-ccaatagcgtatattaaattt
gttgaagttaaaaagctcgtagttggatctcaggta-ag-------gtgtg-tcgg-tgt
ggac-tat----gtcca-t---------ctccgtt-cat--atctgccttttt-------
-c---agttgtatgtcaatccatggttgtctttattgattgcta--tg-gagagctcaac
acgtttaccttgaaaaaatcagagtgcttaaagcaggcct--t--tgtgcttgtatgt-t
gt-tgcatggaataatggaacaagacttc---gga-aat-attttgtt-g-atttca-ac
t-t------cc-gaagtaa-tgaacaatagagacag-tcgggggcatttctatggctgtg
ttagaggtga---aattctgagatcgcagccagagaaac-tattgcgaaagcatttgcca
agtatgtcttcattaatcaagaacgaaagtcagaggttcgaagacgatcagataccgt-c
ctagttctgaccttaaacgatgtcgaccgata-atcagaggtgg-ttat--tttttttat
taactcttctggctg-t-ccct-gagaaatc-tttagtt---agattcttgggggaatat
ggt-cacaaggctgaaacttaaaggaattgacggaagggcaccaccaggagtggagcctg
cggcttaatttgactcaacacggggaatctcacccggtccggacactgttaggatggaca
gat--tgatagctctttcttgattcagtgggtggtggtgcatggccgttcttagttggtg
gagtgatttgtctggttaa--ttccgataacgaacgagactctttcctgc-taaatag--
---ttca--tgggcatcgg--------------ctgcc-----------t-tatggtggc
taca-gctcat-gca--aac-ttcttagaggaattcg-cggtac-----ttca-agccgc
acgaaa-tagagcaataacaggtctgtgatgccctta-gatgtccggggccgcac-----
----------------------------------gcgcg-ctacattgacagtatcaaca
agtattc-ccacctggtctgaga-agatcgggaaatctt--tgaattactgtctccacag
ggattgaggtttgcaactatccctcatgaacgaggaattcctagtaggcgcaagtcatca
gcttgcgtcgattatgtccctgccctttgtacacaccgcccgtcgctactaccgattgag
tggattagtgaggccctcggattgagaactttgt-g--g-c------------gcaagtc
ac-------tttg-tttttgaa-aagt-gggtcaaac-ttgttcatttagaggaag--t-
aaaagtcgtaacaaggtt-tccgtag----------------------------------
------------------------------------------------------------
------------------------------------------------------------
------------------------------------------------------------
------------------------------------------------------------
------------------------------------------------------------
-----------
>KC529415_Trigonostomum_watsoni
------------------------------------------------------------
--------------cctgccagtaattat-atgcttgtctcaaagattaag-ccatgcat
gtataagtacaca-cc-t-taac-acggtgagaccgcg-aatggctcattaaatcagcta
ttatttcttagatctta-ca-a--tttacttgg--ataactgtagtaattcta-gagcta
ataca-tttc--a--a-agtgccttagtctt-c-------gg-actcaagtgc-ggattt
attag-aaca--aaacca-ac-cag---c-------ttc-----------g-g--c-tg-
t-tta------------------tttgt-aa-actctggataac-tt-at--cagatcgc
atgg-cc--ttgtgccggcgacatatc-tttcaagtagctgacctatca-actgacgttg
gtgagttatttgctca-ccatggtgttgacgggtaacggggaatcagggttcgataccgg
agagggag-ccttagaaacggctaccacatctaaggaaggcagcaggcgcgcaaattacc
cactctcagct----agaggaggtagtga-cgataaataacaatgcaggactc-aatatg
aggctctgcaattggaatgagtacaa-tctaaatcc-ttt-aacgagtaccaattgg-ag
ggcaag-tctggtgccagcagccgcggtaattccagct-ccaatagcgtatattaaattt
gttgaagttaaaaagctcgtagttggatctcaggcc-ag-------atgtg-tcgg-tgt
ggtc-aat----ggcca-t---------ctccgtt-cac--atttgccttttt-------
-t---agctgtttgtcttcttattgttctcttcactgagtgctt--ta-ggaagctcggc
acgtttaccttgaaaaaatcagagtgcttaaagcaggcct--t--tgtgcttgtatgt-t
gt-tgcatggaataatggaataggacttc---ggt-tct-attttgtt-g-gttttc-gg
t-a------ct-gaagtaa-tgaataatagagacag-tcgggggcatttctatggctgtg
ttagaggtga---aattctgagatcgcagccagagaaac-tactgcgaaagcatttgcca
agcatgtcttcattaatcaagaacgaaagtcagaggttcgaagacgatcagataccgt-c
ctagttctgaccttaaacgatgcagactaata-atcagaggtgg-tta---tatttttat
taatccttctggctg-t-tcct-gggaaaccttttagta---atgttcttgggggaatat
gat-gtcaacattgaaacttaaaggaattgacggaagggcaccaccaggagtggagcctg
cggcttaatttgactcaacacggggaaactcacccggtccggacactgttaggatggaca
gat--tgatagctctttcttgattcagtgggtggtggtgcatggccgttcttagttggtg
gagtgatttgtctggttaa--ttccgataacgaacgagactctgtcctgc-taactag--
---ttca--gtagcatcgg--------------ctgcc-----------t-ttaggtggc
taca-gcttct-gct--aac-ttcttagagggattcg-cggtac-----ttta-agccgc
acgaaa-tagagcaataacaggtctgtgatgccctta-gatgtccggggccgcac-----
----------------------------------gcgcg-ctacattgacagtattaaca
agtaata-acacctggactgaaa-agttcgggaaatctt--tgaattactgtctccacag
ggattgaggtttgtaactatccctcatgaacgaggaattcccagtaggcgcaagtcatca
gcttgcgtcgattacgtccctgccctttgtacacaccgcccgtcgctactaccgattgag
tggattagtgaggccctcggattgaagtttgagt-g--g-aa-----------tttctcc
at-------tcat-acattgaa-aagt-gggtcaaac-ttgttcatttagaggaag--t-
aaaagtcgtaacaaggtt-tccgtaggtgaacctgc-ag---------------------
------------------------------------------------------------
------------------------------------------------------------
------------------------------------------------------------
------------------------------------------------------------
------------------------------------------------------------
-----------
>KC529414_Trigonostomum_penicillatum
------------------------------------------------------------
------------------------------------------------------------
---------------------------------------aatggctcattaaatcagcta
ttatttcttagatctta-caca--attacttgg--ataactgtagtaattcta-gagcta
ataca-tgtc--a--a-tgtgccacagtctt-t-------tt-gactgtgtgc-ggattt
attag-atca--aaacca-ac-cgg---c-------ttc-----------g-g--t-cg-
t-ttt------------------aatgg-tg-actctggataac-tt-ac--ctgatcgc
atag-cc--ttgagctggcgacatatc-tttcaagtgtctgccctatca-actgacgttg
gtgagttacttgctca-ccatggtgttaacgggtaacggggaatcagggttcgataccgg
agagggag-ccttagaaatggctaccacatctaaggaaggcagcaggcgcgcaaattacc
cactctcagct----agaggaggtagtga-cgataaataacaatgcaggactc-attacg
aggctctgcaattggaatgagtacaa-tctaaatcc-ttt-aacgagtaccaattgg-ag
ggcaag-tctggtgccagcagccgcggtaattccagct-ccaatagcgtatattaaattt
gttgaagttaaaaagctcgtagttggatctcaggta-ag-------gtgtg-tcgg-ttt
ggtc-ctt----gatca-a---------ttccgtt-cat--atctgccttttt-------
-t---agctgtttgtatctatatggttttctttattgaatgctg--ta-aagatctcggc
acgtttaccttgaaaaaatcagagtgcttaaagcaggcct--t--gttgcttgtatgg-t
gt-tgcatggaataatgaaataggatttc---gat-tct-attttgtt-g-gttttc-gg
t-t------tc-gaaataa-tgaacaatagagacag-tcgggggcatttctatggctgtg
ttagaggtga---aattctgagatcgcagccagagaaac-tactgcgaaagcatttgcca
agcatgtcttcattaatcaagaacgaaagtcagaggttcgaagacgatcagataccgt-c
ctagttctgaccttaaacgatgccgaccaata-atcaggggtgg-tta---tatttttat
taatcctcctggctg-t-tcct-gggaaa-c-cttagtt---aggttcttgggggactat
ggt-cacaagggtgaaacttaaaggaattgacggaagggcaccaccaggagtggagcctg
cggcttaatttgactcaacacgggaaaactcacccggtccggacactgttaggatggaca
gat--tgatagctctttcttgattcagtgggtggtggtgcatggccgttcttagttggtg
gagtgatttgtctggttaa--ttccgataacgaacgagactctgtcctgc-taactag--
---tcta--gtggcatcgg--------------ttgcc-----------t-cctggtgac
taaa-gctgct-aat--gac-ttcttagagggattcg-cggtac-----ttta-agccgc
acgaaa-tagagcaataacaggtctgtgatgccctta-gatgtccggggccgcac-----
----------------------------------gcgcg-ctacattgacagtatcaata
agtattc-acacctgatcttaaa-agattgggaaatctt--tgaattactgtctccacag
ggattgaggtttgcaactatccctcatgaacgaggaattcccagtaggcgcaagtcatca
gcttgcgtcgattacgtccctgccctttgtacacaccgcccgtcgctactaccgattgag
tggattagtgaggatctcggattgaggactttat-g--g-tg-----------tttcatc
gt-------attg-tctttaaa-aagt-gattcaaac-ttgttcatttagaggaag--t-
aaaagtcgtaacaaggtt-tccgta-----------------------------------
------------------------------------------------------------
------------------------------------------------------------
------------------------------------------------------------
------------------------------------------------------------
------------------------------------------------------------
-----------
>KC529413_Beklemischeviella_contorta
------------------------------------------------------------
----------------tgccagtaattat-atgcttgtctcaaagattaag-ccatgcat
gtataagtacaca-cc-t-taat-acggtgagaccgcg-aatggctcattaaatcagcta
ttatttcttagatctta-caca--attacttgg--ataactgtagtaattcta-gagcta
ataca-tgtc--a--a-tgtgcctcagtctt-t-------ac-ggctgagtgc-ggattt
attag-ttta--aaacca-ac-cgt---c-------ttc-----------g-g--g-cg-
t-atg------------------tttgg-tg-actctggataac-tc-tc--ctgatcgc
atgg-cc--tcgagccggcgacgtatc-tttcaagtgtctgccctatca-actgacgttg
gtgagttacttgctca-ccatggtgttaacgggtaacggggaatcagggttcgataccgg
agagggag-ccttagaaatggctaccacatctaaggaaggcagcaggcgcgcaaattacc
cactctcagct----agaggaggtagtga-cgataaataacaatgcaggactc-aatttg
aggctctgcaattggaatgagtacaa-tttaaatcc-ttt-aacgagtaccaattgg-ag
ggcaag-tctggtgccagcagccgcggtaattccagct-ccaatagcgtatattaaattt
gttgcagttaaaaagctcgtagttggatctcaggta-ag-------gtgtg-tcgg-tgt
ggtc-tat----ggcca-t---------ctccgtt-cat--atctgccttttt-------
-t---agctgattgtctcgttatagttctcttcattgagcattg--ta-gcgagctcggc
acgtttaccttgaaaaaatcagagtgcttaaagcaggcct--t--tgtgcttgtatgg-t
gt-tgcatggaataatggaataggacttc---ggt-tct-attttgtt-g-gttttc-gg
t-a------tc-gaagtaa-tgaacaatagagacag-tcgggggcatttctatggctgtg
ttagaggtga---aattctgagatcgcagccagagaaac-tactgcgaaagcatttgcca
agcatgtcttcattaatcaagaacgaaagtcagaggttcgaagacgatcagataccgt-c
ctagttctgaccttaaacgatgccgaccgata-atcaggggtgg-------ttttttttt
taaccctcctggctg-t-ccct-gggaaa-c-cttagtt---aggttctggggggattat
ggt-cacaaggttggaacttaaaggaattgacggaagggcaccaccaggagtggagcctg
cggcttaatttgactcaacacgggaaaactcacccggtccggacactgttaggatggaca
gat--tgatagctctttcttgattcagtgggtggtggtgcatggccgttcttagttggtg
gagtgatttgtctggttaa--ttccgataacgaacgagactctgtcctgc-taaatag--
---tcca--gtggcatcgg--------------ctgcc-----------t--atggtggc
taca-gctgct-gca--gac-ttcttagagggattcg-cggta------ttta-aatcgc
acgaaa-tagagcaataacaggtctgtgatgccctta-gatgtccggggccgcac-----
----------------------------------gcgcg-ctacattgacagtatcagca
agtattt-ccacctggtctgaaa-agatcgggaaatctt--tgaattactgtctccacag
ggattgaggtttgcaactatccctcatgaacgaggaattcccagtaggcgcaagtcatca
gcttgcgtcgattacgtccctgccctttgtacacaccgcccgtcgctactaccgattgag
tggattagtgaggccctcggattgaagctttggt-a--g-c------------ctcggct
at-------cttt-gttttgag-aagt-gggtcaaac-ttgttcatttagaggaag--t-
aaaagtcgtaacaaggtt-tccgtaggtgaacct--------------------------
------------------------------------------------------------
------------------------------------------------------------
------------------------------------------------------------
------------------------------------------------------------
------------------------------------------------------------
-----------
>KC529412_Beklemischeviella_angustior
------------------------------------------------------------
tacctg-gtt-gatcctgccagtaattat-atgcttgtctcaaagattaag-ccatgcat
gtataagtacaca-cc-t-taat-acggtgagaccgcg-aatggctcattaaatcagcta
ttatttcttagatctta-caca--attacttgg--ataactgtagtaattcta-gagcta
ataca-tgtc--a--a-tgtgccacagtctt-t-------ac-ggctgtgtgc-ggattt
attag-ttta--aaacca-ac-cgt---c-------ttc-----------g-g--g-cg-
t-atg------------------tttgg-tg-actctggataac-tc-tc--ctgatcgc
atgg-cc--tagagccggcgacgtatc-tttcaagtgtctgccctatca-actgacgttg
gtgagttacttgctca-ccacggtgttaacgggtaacggggaatcagggttcgataccgg
agagggag-ccttagaaatggctaccacatctaaggaaggcagcaggcgcgcaaattacc
cactctcagct----agaggaggtagtga-cgataaataacaatgcaggactc-tttatg
aggctctgcaattggaatgagtacaa-tttaaatcc-ttt-aacgagtaccaattgg-ag
ggcaag-tctggtgccagcagccgcggtaattccagct-ccaatagcgtatattaaattt
gttgcagttaaaaagctcgtagttggatctcaggta-ag-------gtgtg-tcgg-tgt
ggtc-tat----ggcca-t---------ctccgtt-cat--atctgccttttt-------
-t---agctgatagtctcgttatagttctcttcattgagcattg--ta-gcgagctcggc
acgtttaccttgaaaaaatcagagtgcttaaagcaggcct--t--tgtgcttgtatgt-t
gt-tgcatggaataatggaataggacttc---ggt-tct-attttgtt-g-gttttc-gg
t-a------tc-gaagtaa-tgaacaatagagacag-tcgggggcatttctatggctgtg
ttagaggtga---aattctgagatcgcagccagagaaac-tactgcgaaagcatttgcca
agcatgtcttcattaatcaagaacgaaagtcagaggttcgaagacgatcagataccgt-c
ctagttctgaccttaaacgatgccgaccgata-atcaggggtgg-------tttttattt
taaccctcctggctg-t-ccct-gggaaa-c-cttagtt---aggttctggggggattat
ggt-cacaaggttggaacttaaaggaattgacggaagggcaccaccaggagtggagcctg
cggcttaatttgactcaacacgggaaaactcacccggtccggacactgttaggatggaca
gat--tgatagctctttcttgattcagtgggtggtggtgcatggccgttcttagttggtg
gagtgatttgtctggttaa--ttccgataacgaacgagactctgtcctgc-taaatag--
---tcca--gtggcatcag--------------ctgcc-----------ttcatggtggc
taca-gctgct-gca--gac-ttcttagagggattcg-cggta------ttta-aatcgc
acgaaa-tagagcaataacaggtctgtgatgccctta-gatgtccggggccgcac-----
----------------------------------gcgcg-ctacattgacagtatcaaca
agtattt-ccacctggtctgaaa-agatcgggaaatctt--tgaattactgtctccacag
ggattgaggtttgcaactatccctcatgaacgaggaattcccagtaggcgcaagtcatca
gcttgcgtcgattacgtccctgccctttgtacacaccgcccgtcgctactaccgattgag
tggattagtgaggccctcggattgaagctttggt-a--g-t------------ttcgact
at-------cttt-gttttgag-aagt-gggtcaaac-ttgttcatttagaggaag--t-
aaaagtcgtaacaaggtt-tccgtaggtgaacctgc-aga-tggatca------------
------------------------------------------------------------
------------------------------------------------------------
------------------------------------------------------------
------------------------------------------------------------
------------------------------------------------------------
-----------
>KC529411_Proxenetes_puccinellicola
------------------------------------------------------------
--------------cctgccagtaattat-atgcttgtctcaaagattaag-ccatgcat
gtataagtacaca-cc-t-taat-acggtgagaccgcg-aatggctcattaaatcagcta
ttatttcttagatctta-caca--attacttgg--ataactgtagtaattcta-gagcta
ataca-tgtc--a--a-tgtgccgcagttt--------------actgtgtgc-ggattt
attag-aaca--aaacca-ac-cgg---c-------ttc-----------g-g--c-cg-
t-att------------------attgg-tg-actctggataac-tc-tc--ctgatcgc
atgg-cc--ttgagccggcgacgtatc-tttcaagtgtctgccctatca-actgacgttg
gtgagttacttgctca-ccatggttttaacgggtaacggggaatcagggttcgataccgg
agagggag-ccttagaaatggctaccacatctaaggaaggcagcaggcgcgcaaattacc
cactctcagct----agaggaggtagtga-cgataaataacaatgcaggactc-aatacg
aggctctgcaattggaatgagtacaa-tttaaatcc-ttt-aacgagtaccaattgg-ag
ggcaag-tctggtgccagcagccgcggtaattccagct-ccaatagcgtatattaaattt
gttgcagttaaaaagctcgtagttggatctcaggta-ag-------gtgta-tcgg-tgt
ggcc-tat----ggtca-t---------ctccgtt-tat--atctgccttttt-------
-t---agctgttagtcttgctatggttctcttaattgagtgctg--ta-gtgagctcggc
acgtttaccttgaaaaaatcagagtgctcaaagcaggcct--t--tgtgcttgtatgg-t
gt-tgcatggaataatggaataggacttc---gta-cct-attttgtt-g-gtttcc-gg
t-a------tc-gaagtaa-tgaacaatagagacag-tcgggggcatttctatggctgtg
ttagaggtga---aattctgagatcgcagccagagaaac-tactgcgaaagcatttgcca
agcatgtcttcattaatcaagaacgaaagtcagaggttcgaagacgatcagataccgt-c
ctagttctgaccttaaacgatgccgaccgata-atcaggggtgg--------tttttttt
taaccctcctggctg-t-ccct-gggaaa-c-cttagtt---aggttctggggggattat
ggt-cacaaggttggaacttaaaggaattgacggaagggcaccaccaggagtggagcctg
cggcttaatttgactcaacacgggaaaactcacccggtccggacactgttaggatggaca
gat--tgatagctctttcttgattcagtgggtggtggtgcatggccgttcttagttggtg
gagtgatttgtctggttaa--ttccgataacgaacgagactctgtcctgc-taaatag--
---tcta--gtggcatcgg--------------ctgcc-----------t-cacggtggc
taca-gctact-act--gac-ttcttagaggtattcg-cggta------ttta-aaccgc
acgaaa-tagagcaataacaggtctgtgatgccctta-gatgtccggggccgcac-----
----------------------------------gcgcg-ctacattgacagtatcaaca
agtattc-acacctggtctgaaa-agatcgggaaatctt--tgaattactgtctccacag
ggattgaggtttgcaactatccctcatgaacgaggaattcccagtaggcgcaagtcatca
gcttgcgtcgattacgtccctgccctttgtacacaccgcccgtcgctactaccgattgag
tggattagtgaggcccatggattggtgtcttggt-g--g-ct-----------tttagtc
at-------cttg-gtactgct-aaat-gggtcaaac-ttgttcatttagaggaag--t-
aaaagtcgtaacaaggtt-tccgtaggtgaacctgc-ag---------------------
------------------------------------------------------------
------------------------------------------------------------
------------------------------------------------------------
------------------------------------------------------------
------------------------------------------------------------
-----------
>KC529410_Proxenetes_simplex
------------------------------------------------------------
-------------tcctgccagtaattat-atgcttgtctcaaagattaag-ccatgcat
gtataagtacaca-cc-t-taaa-acggtgagaccgcg-aatggctcattaaatcagcta
ttatttcttagatctta-caca--attacttgg--ataactgtagtaattcta-gagcta
ataca-tgtc--a--a-tgtgccacagttt--------------actgtgtgc-ggattt
attag-aaca--aaacca-ac-cga---c-------ttc-----------g-g--t-cg-
t-att------------------attgg-tg-actctggataac-tc-tc--ctgatcgc
atgg-cc--ttgagccggcgacgtatc-tttcaagtgtctgccctatca-actgacgttg
gtgagttacttgctca-ccatggttttaacgggtaacggggaatcagggttcgataccgg
agagggag-ccttagaaatggctaccacatctaaggaaggcagcaggcgcgcaaattacc
cactctcagct----agaggaggtagtga-cgataaataacaatgcaggactc-aatacg
aggctctgcaattggaatgagtacaa-tttaaatcc-ttt-aacgagtatcaattgg-ag
ggcaag-tctggtgccagcagccgcggtaattccagct-ccaatagcgtatattaaattt
gttgcagttaaaaagctcgtagttggatctcaggta-ag-------gtgta-tcgg-tgt
ggcc-tat----ggtca-t---------ctccgtt-tat--atctgccttttt-------
-t---agctgttagtcttgctatggttctcttaattgagtgctg--ta-gtgagctcggc
acgtttaccttgaaaaaatcagagtgctcaaagcaggcct--t--tgtgcttgtatgg-t
gt-tgcatggaataatggaataggacttc---gta-cct-attttgtt-g-gtttcc-gg
t-a------tc-gaagtaa-tgaacaatagagacag-tcgggggcatttctatggctgtg
ttagaggtga---aattctgagatcgcagccagagaaac-tactgcgaaagcatttgcca
agcatgtcttcattaatcaagaacgaaagtcagaggttcgaagacgatcagataccgt-c
ctagttctgaccttaaacgatgccgaccgata-atcaggggtgg-------ttttttttt
taaccctcctggctg-t-ccct-gggaaa-c-cttagtt---aggttctggggggattat
ggt-cacaaggttggaacttaaaggaattgacggaagggcaccaccaggagtggagcctg
cggcttaatttgactcaacacgggaaaactcacccggtccggacactgttaggatggaca
gat--tgatagctctttcttgattcagtgggtggtggtgcatggccgttcttagttggtg
gagtgatttgtctggttaa--ttccgataacgaacgagactctgtcctgc-taaatag--
---tcta--gtggcatcgg--------------ctgcc-----------t-cacggtggc
taca-gctact-act--gac-ttcttagagggattcg-cggta------ttta-aaccgc
acgaaa-tagagcaataacaggtctgtgatgccctta-gatgtccggggccgcac-----
----------------------------------gcgcg-ctacattgacagtatcaaca
agtattc-acacctggtctgaaa-agatcgggaaatctt--tgaattactgtctccacag
ggattgaggtttgcaactatccctcatgaacgaggaattcccagtaggcgcaagtcatca
gcttgcgtcgattacgtccctgccctttgtacacaccgcccgtcgctactaccgattgag
tggattagtgaggcccatggattgggactttgtt-g--g-c------------tttggtt
aa-------catt-gttctgct-aaat-gggtcaaac-ttgttcatttagaggaag--t-
aaaagtcgtaacaaggtt-tccgtaggtgaacctgc-aga-tggatcaa-----------
------------------------------------------------------------
------------------------------------------------------------
------------------------------------------------------------
------------------------------------------------------------
------------------------------------------------------------
-----------
>KC529409_Proxenetes_karlingi
------------------------------------------------------------
---ctg-gtt-gatcctgccagtaattat-atgcttgtctcaaagattaag-ccatgcat
gtataagtacaca-cc-t-taat-acggtgagaccgcg-aatggctcattaaatcagcta
ttatttcttagatctta-caca--attacttgg--ataactgtagtaattcta-gagcta
ataca-tgtc--a--a-tgtgccacagttt--------------actgtgtgc-ggattt
attag-aaca--aaacca-ac-cgg---c-------ttc-----------g-g--t-cg-
t-att------------------attgg-tg-actctggataac-tc-tc--ctgatcgc
atgg-cc--ttgagccggcgacgtatc-tttcaagtgtctgccctatca-actgacgttg
gtgagttacttgctca-ccatggttttaacgggtaacggggaatcagggttcgataccgg
agagggag-ccttagaaatggctaccacatctaaggaaggcagcaggcgcgcaaattacc
cactctcagct----cgaggaggtagtga-cgataaataacaatgcaggactc-aatacg
aggctctgcaattggaatgagtacaa-tttaaatcc-ttt-aacaagtatcaattgg-ag
ggcaag-tctggtgccagcagccgcggtaattccagct-ccaatagcgtatattaaattt
gttgcagttaaaaagctcgtagttggatctcaggta-ag-------gtgta-tcgg-tgt
ggcc-tat----ggtca-t---------ctccgtt-tat--atctgccttttt-------
-c---agctgttagccttgctatggttctcttaactgagtgctg--ta-gtgagctcggc
acgtttaccttgaaaaaatcagagtgctcaaagcaggcct--t--tgtgcttgtatgg-t
gt-tgcatggaataatggaataggacttc---gta-cct-attttgtt-g-gtttcc-gg
t-a------tc-gaagtaa-tgaacaatagagacag-tcgggggcatttctatggctgtg
ttagaggtga---aattctgagatcgcagccagagaaac-tactgcgaaagcatttgcca
agcatgtcttcattaatcaagaacgaaagtcagaggttcgaagacgatcagataccgt-c
ctagttctgaccttaaacgatgccgaccgata-atcaggggtgg-------tttttattt
taaccctcctggctg-t-ccct-gggaaa-c-cttagtt---aggttctggggggattat
ggt-cacaaggttggaacttaaaggaattgacggaagggcaccaccaggagtggagcctg
cggcttaatttgactcaacacgggaaaactcacccggtccggacactgttaggatggaca
gat--tgatagctctttcttgattcagtgggtggtggtgcatggccgttcttagttggtg
gagtgatttgtctggttaa--ttccgataacgaacgagactctgtcctgc-taaatag--
---tcta--gtggcatcgg--------------ctgcc-----------t-aacggtggc
taca-gctact-act--gac-ttcttagagggattcg-cggta------ttta-aaccgc
acgaaa-tagagcaataacaggtctgtgatgccctta-gatgtccggggccgcac-----
----------------------------------gcgcg-ctacattgacagtatcaaca
agtattc-acacctggtctgaaa-agatcgggaaatctt--tgaattactgtctccacag
ggattgaggtttgcaactatccctcatgaacgaggaattcccagtaggcgcaagtcatca
gcttgcgtcgattacgtccctgccctttgtacacaccgcccgtcgctactaccgattgag
tggattagtgaggcccatggattgggactttgtt-g--g-c------------tttggtt
aa-------catt-gttctgct-aaat-gggtcaaac-ttgttcatttagaggaag--t-
aaaagtcgtaacaaggtt-tccgtaggtgaacctgc-aga-tggatcaa-----------
------------------------------------------------------------
------------------------------------------------------------
------------------------------------------------------------
------------------------------------------------------------
------------------------------------------------------------
-----------
>KC529408_Proxenetes_fasciger
------------------------------------------------------------
------------------------------------------------------------
---------------------------------ccgcg-aatggctcattaaatcagcta
ttatttcttagatctta-caca--attacttgg--ataactgtagtaattcta-gagcta
ataca-tgtc--a--a-tgtgccacagttt--------------actgtgtgc-ggattt
attag-aaca--aaacca-ac-cgg---c-------ttc-----------g-g--c-cg-
t-att------------------attgg-tg-actctggataac-tc-tc--ctgatcgc
atgg-cc--ttgagccggcgacgtatc-tttcaagtgtctgccctatca-actgacgttg
gtgagttacttgctca-ccatggttttaacgggtaacggggaatcagggttcgataccgg
agagggag-ccttagaaatggctaccacatctaaggaaggcagcaggcgcgcaaattacc
cactctcagct----agaggaggtagtga-cgataaataacaatgcaggactc-tttacg
aggctctgcaattggaatgagtacaa-tttaaatcc-ttt-aacgagtaccaattgg-ag
ggcaag-tctggtgccagcagccgcggtaattccagct-ccaatagcgtatattaaattt
gttgcagttaaaaagctcgtagttggatctcaggta-ag-------gtgta-tcgg-tgt
ggcc-tat----ggtca-t---------ctccgtt-tgc--atctgccttttt-------
-t---agctgttagtcttgctatggttctcttaactgagtgctg--ta-gtgagctcggc
acgtttaccttgaaaaaatcagagtgctcaaagcaggcct--t--tgtgcttgtatgg-t
gt-tgcatggaataatggaataggacttc---gta-cct-attttgtt-g-gtttcc-gg
t-a------tc-gaagtaa-tgaacaatagagacag-tcgggggcatttctatggctgtg
ttagaggtga---aattctgagatcgcagccagagaaac-tactgcgaaagcatttgcca
agcatgtcttcattaatcaagaacgaaagtcagaggttcgaagacgatcagataccgt-c
ctagttctgaccttaaacgatgccgaccgata-atcaggggtgg-------tttttattt
taaccctcctggctg-t-ccct-gggaaa-c-cttagtt---aggttctggggggattat
ggt-cacaaggttggaacttaaaggaattgacggaagggcaccaccaggagtggagcctg
cggcttaatttgactcaacacgggaaaactcacccggtccggacactgttaggatggaca
gat--tgatagctctttcttgattcagtgggtggtggtgcatggccgttcttagttggtg
gagtgatttgtctggttaa--ttccgataacgaacgagactctgtcctgc-taactag--
---tcca--gtggcatcgg--------------ctgcc-----------t-cacggcggc
taca-gctact-gct--gac-ttcttagagggattcg-cggta------ttta-aaccgc
acgaaa-tagagcaataacaggtctgtgatgccctta-gatgtccggggccgcac-----
----------------------------------gcgcg-ctacattgacagtatcagca
agtattc-acacctggtctgaaa-agatcgggaaatctt--tgaattactgtctccacag
ggattgaggtttgcaactatccctcatgaacgaggaattcccagtaggcgcaagtcatca
gcttgcgtcgattacgtccctgccctttgtacacaccgcccgtcgctactaccgattgag
tggattagtgaggcccatggattgggactttgtt-g--g-c------------tttggtt
aa-------catt-gttctgct-aaat-gggtcaaac-ttgttcatttagaggaag--t-
aaaagtcgtaacaaggtt-tccgtaggtgaacctgc-aaa-cag----------------
------------------------------------------------------------
------------------------------------------------------------
------------------------------------------------------------
------------------------------------------------------------
------------------------------------------------------------
-----------
>KC529407_Proxenetes_bilioi
------------------------------------------------------------
-------------tcctgccagtaattat-atgcttgtctcaaagattaag-ccatgcat
gtataagtacaca-cc-t-taat-acggtgagaccgcg-aatggctcattaaatcagcta
ttatttcttagatctta-caca--attacttgg--ataactgtagtaattcta-gagcta
ataca-tgtc--a--a-tgtgccgcagttt--------------actgtgtgc-ggattt
attag-aaca--aaacca-ac-cgg---c-------ttc-----------g-g--c-cg-
t-att------------------attgg-tg-actctggataac-tc-tc--ctgatcgc
atgg-cc--ttgagccggcgacgtatc-tttcaagtgtctgccctatca-actgacgttg
gtgagttacttgctca-ccatggttttaacgggtaacggggaatcagggttcgataccgg
agagggag-ccttagaaatggctaccacatctaaggaaggcagcaggcgcgcaaattacc
cactctcagct----agaggaggtagtga-cgataaataacaatgcaggactc-aatacg
aggctctgcaattggaatgagtacaa-tttaaatcc-ttt-aacgagtaccaattgg-ag
ggcaag-tctggtgccagcagccgcggtaattccagct-ccaatagcgtatattaaattt
gttgcagttaaaaagctcgtagttggatctcaggta-ag-------gtgta-tcgg-tgt
ggcc-tat----ggtca-t---------ctccgtt-tat--atctgccttttt-------
-t---agctgttagtcttgctatggttctcttaattgagtgctg--ta-gtgagctcggc
acgtttaccttgaaaaaatcagagtgctcaaagcaggcct--t--tgtgcttgtatgg-t
gt-tgcatggaataatggaataggacttc---gta-cct-attttgtt-g-gtttcc-gg
t-a------tc-gaagtaa-tgaacaatagagacag-tcgggggcatttctatggctgtg
ttagaggtga---aattctgagatcgcagccagagaaac-tactgcgaaagcatttgcca
agcatgtcttcattaatcaagaacgaaagtcagaggttcgaagacgatcagataccgt-c
ctagttctgaccttaaacgatgccgaccgata-atcaggggtgg-------ttttttttt
taaccctcctggctg-t-ccct-gggaaa-c-cttagtt---aggttctggggggattat
ggt-cacaaggttggaacttaaaggaattgacggaagggcaccaccaggagtggagcctg
cggcttaatttgactcaacacgggaaaactcacccggtccggacactgttaggatggaca
gat--tgatagctctttcttgattcagtgggtggtggtgcatggccgttcttagttggtg
gagtgatttgtctggttaa--ttccgataacgaacgagactctgtcctgc-taaatag--
---tcta--gtggcatcgg--------------ctgcc-----------t-cacggtggc
taca-gctact-act--gac-ttcttagaggtattcg-cggta------ttta-aaccgc
acgaaa-tagagcaataacaggtctgtgatgccctta-gatgtccggggccgcac-----
----------------------------------gcgcg-ctacattgacagtatcagca
agtattc-acacctggtctgaaa-agatcgggaaatctt--tgaattactgtctccacag
ggattgaggtttgcaactatccctcatgaacgaggaattcccagtaggcgcaagtcatca
gcttgcgtcgattacgtccctgccctttgtacacaccgcccgtcgctactaccgattgag
tggattagtgaggcccatggattggtgtcttggt-g--g-ct-----------tttagtc
at-------cttg-gtactgct-aaat-gggtcaaac-ttgttcatttagaggaag--t-
aaaagtcgtaacaaggtt-tccgtaggtgaacctgc-ag---------------------
------------------------------------------------------------
------------------------------------------------------------
------------------------------------------------------------
------------------------------------------------------------
------------------------------------------------------------
-----------
>KC529406_Proxenetes_quinquespinosus
------------------------------------------------------------
tacctg-gtt-gatcctgccagtaattat-atgcttgtctcaaagattaag-ccatgcat
gtataagtacaca-cc-t-ttaa-acggtgagaccgcg-aatggctcattaaatcagcta
ttatttcttagatctta-caca--attacttgg--ataactgtagtaattcta-gagcta
ataca-tgtc--a--a-tgtgccacagttt--------------actgtgtgc-ggattt
attag-aaca--aaacca-ac-cga---c-------ttc-----------g-g--t-cg-
t-att------------------attgg-tg-actctggataac-tc-tc--ctgatcgc
atgg-cc--ttgagccggcgacgtatc-tttcaagtgtctgccctatca-actgacgttg
gtgagttacttgctca-ccatggttttaacgggtaacggggaatcagggttcgataccgg
agagggag-ccttagaaatggctaccacatctaaggaaggcagcaggcgcgcaaattacc
cactctcagct----agaggaggtagtga-cgataaataacaatgcaggactc-aatacg
aggctctgcaattggaatgagtacaa-tttaaatcc-ttt-aacgagtaccaattgg-ag
ggcaag-tctggtgccagcagccgcggtaattccagct-ccaatagcgtatattaaattt
gttgcagttaaaaagctcgtagttggatctcaggta-ag-------gtgta-tcgg-tgt
ggcc-tat----ggtca-t---------ctccgtt-tat--atctgccttttt-------
-t---agctgttagtcttgctatggttctcttaattgagtgctg--ta-gtgagctcggc
acgtttaccttgaaaaaatcagagtgctcaaagcaggcct--t--tgtgcttgtatgg-t
gt-tgcatggaataatggaataggacttc---gta-cct-attttgtt-g-gtttcc-gg
t-a------tc-gaagtaa-tgaacaatagagacag-tcgggggcatttctatggctgtg
ttagaggtga---aattctgagatcgcagccagagaaac-tactgcgaaagcatttgcca
agcatgtcttcattaatcaagaacgaaagtcagaggttcgaagacgatcagataccgt-c
ctagttctgaccttaaacgatgccgaccgata-atcaggggtgg-------ttttt-ttt
taaccctcctggctg-t-ccct-gggaaa-c-cttagtt---aggttctggggggattat
ggt-cacaaggttggaacttaaaggaattgacggaagggcaccaccaggagtggagcctg
cggcttaatttgactcaacacgggaaaactcacccggtccggacactgttaggatggaca
gat--tgatagctctttcttgattcagtgggtggtggtgcatggccgttcttagttggtg
gagtgatttgtctggttaa--ttccgataacgaacgagactctgtcctgc-taaatag--
---tcta--gtggcatcgg--------------ctgcc-----------t-cacggtggc
taca-gctact-act--gac-ttcttagagggattcg-cggta------ttta-aaccgc
acgaaa-tagagcaataacaggtctgtgatgccctta-gatgtccggggccgcac-----
----------------------------------gcgcg-ctacattgacagtatcagca
agtattc-acacctggtctgaaa-agatcgggaaatctt--tgaattactgtctccacag
ggattgaggtttgcaactatccctcatgaacgaggaattcccagtaggcgcaagtcatca
gcttgcgtcgattacgtccctgccctttgtacacaccgcccgtcgctactaccgattgag
tggattagtgaggcccatggattgggactttgtt-g--g-c------------tttggtt
aa-------catt-gttctgca-aaat-gggtcaaac-ttgttcatttagaggaag--t-
aaaagtcgtaacaaggtt-tccgtaggtgaacctgc-aga--------------------
------------------------------------------------------------
------------------------------------------------------------
------------------------------------------------------------
------------------------------------------------------------
------------------------------------------------------------
-----------
>KC529405_Parapharyngiella_sp_NVS2013
------------------------------------------------------------
-------------tcctgccagtaattat-atgcttgtctcaaagattaag-ccatgcat
gtataagtacaca-cc-t-taat-acggtgagaccgcg-aatggctcattaaatcagcta
ttatttcttagatctta-taca---ttacttgg--ataactgtagtaattcta-gagcta
ataca-tgaa--a--c-tatgcctcagtctt-a-------attgattgggtgc-ggattt
attag-aaca--aaacca-ac-cggtcat-------ttc-----------g-g--t-ga-
c-cgttaa-------------aatttgg-tg-actctggataac-tt-at--ctgatcgc
atag-cc--ttgagctggcgacgtatc-tttcaagtgtctgccctatca-actgacgttg
gtgagttacatgctca-ccatggtgataacgggtaacggggaatcagggttcgataccgg
agagggag-ccttagaaacggctaccacatctaaggaaggcagcaggcgcgcaaattacc
cactctcagct----agaggaggtagtga-cgataaataacaatgcaggactc-ataatg
aggctctgcaattggaatgagtacaa-tctaaaacc-ttt-aacgagtaccaattgg-ag
ggcaag-tctggtgccagcagccgcggtaattccagct-ccaatagcgtatattaaaatt
gttgcagttaaaaagctcgtagttggatctcaggtt-tg-------gtgta-ttag-tgt
gatc-tat----gatca-t---------cactata-tgc--atctgcctttca-------
-t---agctgtatgtctatttatggtactctttattgagtgctat-tt-atttgctcagc
acgtttaccttgaaaaaatcagagtgcttaaagcaggcct--t--tgtgcttgaatgt-t
gt-tgcatggaataatggaataggacttc---ggt-tctaattttgtt-g-gttttc-aa
a-g------cc-gaagtaa-tgaaaaatagagacag-acgggggcatttctatggctgtg
ttagaggtga---aattctgagatcgcagccagagaaac-tactgcgaaagcatttgcca
agcatgtcttcattaatcaagaacgaaagtcagaggttcgaagacgatcagataccgt-c
ctagttctgaccttaaacgatgccgaccgata-atcaggggtgg-tta---tataattat
tgaccctcctggctg-t-ccct-gggaaacc-ttcagtt---aggttctggggggattat
ggt-cacaaggtcgaaacttaaaggaattgacggaagggcaccaccaggagtggagcctg
cggcttaatttgactcaacacggggaaactcacccggtccggacactgttaggatggaca
gat--tgatagctctttcttgattcagtgggtggtggtgcatggccgttcttagttggtg
gagtgatttgtctggttaa--ttccgataacgaacgagactctgtcctgc-taactag--
---tcct--atagcatctg--------------tcacta--------tttaatagttgat
aata-gctaga-gct--gac-ttcttagagggattcg-cggtac-----ttta-aaccgc
acgaaa-tagagcaataacaggtctgtgatgccctta-gatgtccggggccgcac-----
----------------------------------gcgcg-ctacattgacagtatcagca
agtattt-ccacctggtctgaaa-agattgggaaatctt--tgaattactgtctccacag
ggattgaggtttgcaactatccctcatgaacgaggaattcccagtaggcgcaagtcatca
gcttgcgtcgattacgtccctgccctttgtacacaccgcccgtcgctactaccgattgag
tggattagtgaggccctcggattgagagcttagt-g--a-t------------gcaaatc
ac-------tttgcattttgaa-aagt-gggtcaaac-ttgttcatttagaggaag--t-
aaaagtcgtaacaaggtt-tccgtaggtgaacctgc-aga-tgga---------------
------------------------------------------------------------
------------------------------------------------------------
------------------------------------------------------------
------------------------------------------------------------
------------------------------------------------------------
-----------
>KC529404_Kytorhynchidae_sp4_NVS2013
------------------------------------------------------------
----tg-gtt-gatcctgccagtagttat-atgcttgtctcaaagattaag-ccatgcat
gtatcagttcaca-cc-t-tcat-atggtgaaaccgcg-aatggctcattaaatcagcta
ttatttcttagatctta-cgat---ttacttgg--ataactgtagtaattcta-gagcta
ataca-tgct--a--t-cgagcctcagtctt-a----------cggttgaggt-ggattt
attag-aaca--aaatca-tc-tggc--t-------ttgcc-------------------
a-ttg------------------attgt-tg-aatctggataac-tt-tt--ctgatcgc
atga-cc--ttgagtcggcgacgtatc-tttcaagtgtctgacctatca-ccta-cgatg
gtggggtatctgccca-ccatgggtgttacgggtaacggggaatcagggttcgattccgg
agagggag-ccttagaaatggctaccacatctaaggaaggcagcaggcgcgcaaattacc
cactctcggct----agaggaggtagtga-cgaaaaataacaatgcaagactc-ataatg
aggccttgcaattggaatgagtacaa-tttaaatcc-ttt-aacgaggagcaattgg-ag
ggcaag-tctggtgccagcagccgcggtaattccagct-ccaatagcgtatattaaaatt
gttgcagttaaaaagctcgtagttggatctcagacg-ag-------gtagg-ttgg-ttc
agctcatt-----gctg-c---------tactaat-ctt-gcccgtcttttt--------
-c---agccggttgatgcttcatggtgctctttactgagtgctt--tgtgagtgcgcggc
acgtttactttgaaaaaattagagtgctcaaagcaggcg---t--ttagcttgaatac-t
gt-tgcatggaataataaaataggacttc---ggt-tct-attttgtt-g-attttc-gg
t-g------cc-gaagtaa-tgataaaaagagacag-acgggggcatttgtatggtggtg
ttagaggtga---aattcttggatcgccgccagacagac-tactgcgaaagcatttgcca
agtatgtcttcattaatcaagaacgaaagtcagaggttcgaagacgatcagataccgt-c
ctagttctgaccataaactatgccaaccgaca-atcaggggcgg-tta---tatttttat
tgaccctcctggctg-t-ccccagggaaacc-tcaagtg---aggttctggggggagtac
ctt-cgcaagaagtaaacttaaaggaattgacggaagggcaccaccaggagtggagcctg
cggcttaatttgactcaacacgggaaaactcacccggcccggacaccagaaggatggaca
gat--tgatagctctttcttgatttggtggatggtggtgcatggccgttcttagttggtg
gagtgatttgtctggttaa--ttccgataacgaacgagactctgtcctgc-taactag--
---tacg--ctgacataagatc-------------------------------gaaaggt
cttc-gttagc-gca--gac-ttcttagagggattcg-cggtt------ttta-g-ccgc
acgaaa-tagagcaataacaggtctgtgatgccctta-gatgtccggggccgcac-----
----------------------------------gcgcg-ctacaatgacagcatcagca
agtatta-aaccctaatctgaga-agattgggaaacctt-ctgaattgctgtctccactg
ggactgggctttgcaattatcgcccacaaacgaggaattcccagtaagcgcaagtcatca
gcttgcgctgattacgtccctgccctttgtacacaccgcccgtcgctactaccgattgaa
tgctttagtgaggcatttggactgggccctatgc-g--g-cgt----------tctcgtt
gc-------atta-ggcttggg-aaga-atgtcaaac-ttgaacatttagaggaag--t-
aaaagtcgtaacaaggtt-tccgtaggtgaacctgc-aga-tggat--------------
------------------------------------------------------------
------------------------------------------------------------
------------------------------------------------------------
------------------------------------------------------------
------------------------------------------------------------
-----------
>KC529403_Kytorhynchidae_sp3_NVS2013
------------------------------------------------------------
------------------ccagtagttat-atgcttgtctcaaagattaag-ccatgcat
gtatcagttcaca-cc-t-tcat-atggtgaaaccgcg-aatggctcattaaatcagcta
ttatttcttagatctta-cgat---ttacttgg--ataactgtagtaattcta-gagcta
ataca-tgct--a--t-cgagcctcagtctt-a----------cggttgaggt-ggattt
attag-aaca--aaatca-tc-tggc--t-------ttgcc-------------------
a-ttg------------------attgt-tg-aatctggataac-tt-tt--ctgatcgc
atga-cc--ttgagtcggcgacgtatc-tttcaagtgtctgacctatca-ccta-cgatg
gtggggtatctgccca-ccatgggtgttacgggtaacggggaatcagggttcgattccgg
agagggag-ccttagaaatggctaccacatctaaggaaggcagcaggcgcgcaaattacc
cactctcggct----agaggaggtagtga-cgaaaaataacaatgcaagactc-ataatg
aggccttgcaattggaatgagtacaa-tttaaatcc-ttt-aacgaggagcaattgg-ag
ggcaag-tctggtgccagcagccgcggtaattccagct-ccaatagcgtatattaaaatt
gttgcagttaaaaagctcgtagttggatctcagacg-ag-------gtagg-ttgg-ttc
agctcatt-----gctg-c---------tactaat-ctt-gcccgtcttttt--------
-c---agccggttgatgcttcatggtgctctttactgagtgctt--tgtgagtgcgcggc
acgtttactttgaaaaaattagagtgctcaaagcaggcg---t--ttagcttgaatac-t
gt-tgcatggaataataaaataggacttc---ggt-tct-attttgtt-g-attttc-gg
t-g------cc-gaagtaa-tgataaaaagagacag-acgggggcatttgtatggtggtg
ttagaggtga---aattcttggatcgccgccagacagac-tactgcgaaagcatttgcca
agtatgtcttcattaatcaagaacgaaagtcagaggttcgaagacgatcagataccgt-c
ctagttctgaccataaactatgccaaccgaca-atcaggggcgg-tta---tatttttat
tgaccctcctggctg-t-ccccagggaaacc-tcaagtg---aggttctggggggagtac
ctt-cgcaagaagtaaacttaaaggaattgacggaagggcaccaccaggagtggagcctg
cggcttaatttgactcaacacgggaaaactcacccggcccggacaccagaaggatggaca
gat--tgatagctctttcttgatttggtggatggtggtgcatggccgttcttagttggtg
gagtgatttgtctggttaa--ttccgataacgaacgagactctgtcctgc-taactag--
---tacg--ctgacataagatc-------------------------------gaaaggt
cttc-gttagc-gca--gac-ttcttagagggattcg-cggtt------ttta-g-ccgc
acgaaa-tagagcaataacaggtctgtgatgccctta-gatgtccggggccgcac-----
----------------------------------gcgcg-ctacaatgacagcatcagca
agtatta-aaccctaatctgaga-agattgggaaacctt-ctgaattgctgtctccactg
ggactgggctttgcaattatcgcccacaaacgaggaattcccagtaagcgcaagtcatca
gcttgcgctgattacgtccctgccctttgtacacaccgcccgtcgctactaccgattgaa
tgctttagtgaggcatttggactgggccctatgc-g--g-cgt----------tctcgtt
gc-------atta-ggcttggg-aaga-atgtcaaac-ttgaacatttagaggaag--t-
aaaagtcgtaacaaggtt-tccgtaggtgaacctgc-aga-tggatcaa-----------
------------------------------------------------------------
------------------------------------------------------------
------------------------------------------------------------
------------------------------------------------------------
------------------------------------------------------------
-----------
>KC529402_Kytorhynchidae_sp2_NVS2013
------------------------------------------------------------
--------------cctgccagtagttat-atgcttgtctcaaagattaag-ccatgcat
gtatcagttcaca-cc-t-tcat-atggtgaaaccgcg-aatggctcattaaatcagcta
ttatttcttagatctta-cgat---ttacttgg--ataactgtagtaattcta-gagcta
ataca-tgct--a--t-cgagcctcagtctt-a----------cggttgaggt-ggattt
attag-aaca--aaatca-tc-tggc--t-------ttgcc-------------------
a-ttg------------------attgt-tg-aatctggataac-tt-tt--ctgatcgc
atga-cc--ttgagtcggcgacgtatc-tttcaagtgtctgacctatca-ccta-cgatg
gtggggtatctgccca-ccatgggtgttacgggtaacggggaatcagggttcgattccgg
agagggag-ccttagaaatggctaccacatctaaggaaggcagcaggcgcgcaaattacc
cactctcggct----agaggaggtagtga-cgaaaaataacaatgcaagactc-ataatg
aggccttgcaattggaatgagtacaa-tttaaatcc-ttt-aacgaggagcaattgg-ag
ggcaag-tctggtgccagcagccgcggtaattccagct-ccaatagcgtatattaaaatt
gttgcagttaaaaagctcgtagttggatctcagacg-ag-------gtagg-ttgg-ttc
agctcatt-----gctg-c---------tactaat-ctt-gcccgtcttttt--------
-c---agccggttgatgcttcatggtgctctttactgagtgctt--tgtgagtgcgcggc
acgtttactttgaaaaaattagagtgctcaaagcaggcg---t--ttagcttgaatac-t
gt-tgcatggaataataaaataggacttc---ggt-tct-attttgtt-g-attttc-gg
t-g------cc-gaagtaa-tgataaaaagagacag-acgggggcatttgtatggtggtg
ttagaggtga---aattcttggatcgccgccagacagac-tactgcgaaagcatttgcca
agtatgtcttcattaatcaagaacgaaagtcagaggttcgaagacgatcagataccgt-c
ctagttctgaccataaactatgccaaccgaca-atcaggggcgg-tta---tatttttat
tgaccctcctggctg-t-ccccagggaaacc-tcaagtg---aggttctggggggagtac
ctt-cgcaagaagtaaacttaaaggaattgacggaagggcaccaccaggagtggagcctg
cggcttaatttgactcaacacgggaaaactcacccggcccggacaccagaaggatggaca
gat--tgatagctctttcttgatttggtggatggtggtgcatggccgttcttagttggtg
gagtgatttgtctggttaa--ttccgataacgaacgagactctgtcctgc-taactag--
---tacg--ctgacataagatc-------------------------------gaaaggt
cttc-gttagc-gca--gac-ttcttagagggattcg-cggtt------ttta-g-ccgc
acgaaa-tagagcaataacaggtctgtgatgccctta-gatgtccggggccgcac-----
----------------------------------gcgcg-ctacaatgacagcatcagca
agtatta-aaccctaatctgaga-agattgggaaacctt-ctgaattgctgtctccactg
ggactgggctttgcaattatcgcccacaaacgaggaattcccagtaagcgcaagtcatca
gcttgcgctgattacgtccctgccctttgtacacaccgcccgtcgctactaccgattgaa
tgctttagtgaggcatttggactgggccctatgc-g--g-cgt----------tctcgtt
gc-------atta-ggcttggg-aaga-atgtcaaac-ttgaacatttagaggaag--t-
aaaagtcgtaacaaggtt-tccgtaggtgaacctgc-aga-tggatcaa-----------
------------------------------------------------------------
------------------------------------------------------------
------------------------------------------------------------
------------------------------------------------------------
------------------------------------------------------------
-----------
>KC529401_Kytorhynchidae_sp1_NVS2013
------------------------------------------------------------
----tg-gtt-gatcctgccagtagttat-atgcttgtctcaaagattaag-ccatgcat
gtatcagttcaca-cc-t-tcat-atggtgaaaccgcg-aatggctcattaaatcagcta
ttatttcttagatctta-cgat---ttacttgg--ataactgtagtaattcta-gagcta
ataca-tgct--a--t-cgagcctcagtctt-a----------cggttgaggt-ggattt
attag-aaca--aaatca-tc-tggc--t-------ttgcc-------------------
a-ttg------------------attgt-tg-aatctggataac-tt-tt--ctgatcgc
atga-cc--ttgagtcggcgacgtatc-tttcaagtgtctgacctatca-ccta-cgatg
gtggggtatctgccca-ccatgggtgttacgggtaacggggaatcagggttcgattccgg
agagggag-ccttagaaatggctaccacatctaaggaaggcagcaggcgcgcaaattacc
cactctcggct----agaggaggtagtga-cgaaaaataacaatgcaagactc-ataatg
aggccttgcaattggaatgagtacaa-tttaaatcc-ttt-aacgaggagcaattgg-ag
ggcaag-tctggtgccagcagccgcggtaattccagct-ccaatagcgtatattaaaatt
gttgcagttaaaaagctcgtagttggatctcagacg-ag-------gtagg-ttgg-ttc
agctcatt-----gctg-c---------tactaat-ctt-gcccgtcttttt--------
-c---agccggttgatgcttcatggtgctctttactgagtgctt--tgtgagtgcgcggc
acgtttactttgaaaaaattagagtgctcaaagcaggcg---t--ttagcttgaatac-t
gt-tgcatggaataataaaataggacttc---ggt-tct-attttgtt-g-attttc-gg
t-g------cc-gaagtaa-tgataaaaagagacag-acgggggcatttgtatggtggtg
ttagaggtga---aattcttggatcgccgccagacagac-tactgcgaaagcatttgcca
agtatgtcttcattaatcaagaacgaaagtcagaggttcgaagacgatcagataccgt-c
ctagttctgaccataaactatgccaaccgaca-atcaggggcgg-tta---tatttttat
tgaccctcctggctg-t-ccccagggaaacc-tcaagtg---aggttctggggggagtac
ctt-cgcaagaagtaaacttaaaggaattgacggaagggcaccaccaggagtggagcctg
cggcttaatttgactcaacacgggaaaactcacccggcccggacaccagaaggatggaca
gat--tgatagctctttcttgatttggtggatggtggtgcatggccgttcttagttggtg
gagtgatttgtctggttaa--ttccgataacgaacgagactctgtcctgc-taactag--
---tacg--ctgacataagatc-------------------------------gaaaggt
cttc-gttagc-gca--gac-ttcttagagggattcg-cggtt------ttta-g-ccgc
acgaaa-tagagcaataacaggtctgtgatgccctta-gatgtccggggccgcac-----
----------------------------------gcgcg-ctacaatgacagcatcagca
agtatta-aaccctaatctgaga-agattgggaaacctt-ctgaattgctgtctccactg
ggactgggctttgcaattatcgcccacaaacgaggaattcccagtaagcgcaagtcatca
gcttgcgctgattacgtccctgccctttgtacacaccgcccgtcgctactaccgattgaa
tgctttagtgaggcatttggactgggccctatgc-g--g-cgt----------tctcgtt
gc-------atta-ggcttggg-aaga-atgtcaaac-ttgaacatttagaggaag--t-
aaaagtcgtaacaaggtt-tccgtaggtgaacctgc-aga-tggat--------------
------------------------------------------------------------
------------------------------------------------------------
------------------------------------------------------------
------------------------------------------------------------
------------------------------------------------------------
-----------
>KC529400_Kytorhynchus_sp_NVS2013
------------------------------------------------------------
-----------gatcctgccagtagttat-atgcttgtctcaaagattaag-ccatgcat
gtatctgttcaca-cc-t-tcat-atggtgaaaccgcg-aatggctcattaaatcagcta
ttatttcttagatctta-cgat---ttacttgg--ataactgtagtaattcta-gagcta
ataca-tgct--a--t-cgagcctcagccgt-g----------aggttgaggt-ggattt
attag-aaca--aaatca-ac-tggc--c-------tagcc-------------------
a-ttg------------------attgt-tg-aatctggataac-tt-tc--ctgatcgc
atga-cc--ttgagtcggcgacgtatc-tttcaagtgtctgacctatca-cct--tgatg
gtggggtatctgccca-ccatgggtgttacgggtaacggggaatcagggttcgattccgg
agagggag-ccttagaaatggctaccacatctaaggaaggcagcaggcgcgcaaattacc
cactctcagct----agaggaggtagtga-cgaaaaataacaatgcaagactc-actatg
aggccttgcaattggaatgagtacaa-tttaaatcc-tct-aacgaggagcaattgg-ag
ggcaag-tctggtgccagcagccgcggtaattccagct-ccaatagcgtatattaaaatt
gttgcagttaaaaagctcgtagttggatctcagacg-ag-------gtagg-ttgg-ttc
agctgttt----agctg-t---------gactaat-ctt-gcccgtcttttt--------
-c---agccggttgatgcttcttggtgctctttactgagtgctt--tgttagtgcacggc
acgtttactttgaaaaaattagagtgctcaaagcaggcg---c--atagcttgaatac-t
gt-tgcatggaataataaaataggacttc---ggt-tct-attttgtt-g-gttttc-gg
t-t------cc-gaagtaa-tgataaaaagagacag-acgggggcatttgtatggtggtg
ttagaggtga---aattctcggatcgccgccagacagac-tactgcgaaagcatttgcca
agtatgtcttcattaatcaagaacgaaagtcagaggttcgaagacgatcagataccgt-c
ctagttctgaccataaactatgccaaccgaca-atcagtggtgg-tta---taattttat
tgaccccactggctg-t-cccccgggaaacc-ttaagtg---aggttctggggggagtac
ctt-cgcaagaagtaaacttaaaggaattgacggaagggcaccaccaggagtggagcctg
cggcttaatttgactcaacacgggaaaactcacccggcccggacaccagaaggatggaca
gat--tgatagctctttcttgatttggtggatggtggtgcatggccgttcttagttggtg
gagtgatttgtctggttaa--ttccgataacgaacgagactctgtcctgc-taactag--
---tacg--ctaacataagatc-------------------------------ttctgat
cttc-gttggc-gca--gac-ttcttagagggattcg-cggtt------ttta-g-ccgc
acgaaa-tagagcaataacaggtctgtgatgccctta-gatgtccggggccgcac-----
----------------------------------gcgcg-ctacaatgacagcatcagca
agtatta-aaccctgatctgaga-agattgggaaacctt-ctgaattgctgtctccactg
ggactgggctttgcaattatcgcccacgaacgaggaattcccagtaagcgcaagtcatca
gcttgcgctgattacgtccctgccctttgtacacaccgcccgtcgctactaccgattgaa
tgttttagtgaggtgtttggactggaccctatgc-g--g-cgt----------cctcgtt
gc-------atta-ggtttggg-aaga-acttcaaac-ttgaacatttagaggaag--t-
aaaagtcgtaacaaggtt-tccgtaggtgaacctgc-aga-tggatca------------
------------------------------------------------------------
------------------------------------------------------------
------------------------------------------------------------
------------------------------------------------------------
------------------------------------------------------------
-----------
>JF429837_Microdalyellia_sinensis
------------------------------------------------------------
----------------------tagtcat-atgcttgtctcaaagattaag-ccatgcat
gtatcagtacagg-cc-t-ttaa-atggctaaaccgcg-aatggctcattaaatcagcta
ttgtttcttagatctta-catt-tcatacttgg--ataactgcagtaattctg-gagcta
ataca-tgcc--a--c-tgtgtttcactcgc-a----------agagtggaat-gggttt
attag-atca--aaacta-ac-caca--c-------ttc-----------g-g-tg-tg-
t-tgg------------------gttga-tg-actctggataac-ca-ac--ctgaccgt
atgg-cc--ttgtgctgacggcgtatc-tttcaagtgtctgacctatca-actgtcgatg
gtatgtgatatgctta-ccatggtgataacgggtaacggggaatcagtgttcgattccgg
agagggag-ccttagaaacggctaccacatctaaggaaggcagcaggcgcgcaaattacc
cactctcagtt----cgaggaggtagtga-cgaaaaataacgatggtagactc-attacg
aggcctaccaattggaatgagtacaa-tttaaatcc-ttt-aacgaggaacaattgg-ag
ggcaag-tctggtgccagcagccgcggtaattccagct-ccaatagcgtatattaaaatt
gttgcagttaaaaagctcgtagttggatctcaggtg-tg-------agtcg-tcgg-tac
aatcttag----tattg-t---------tactgtt-cgt-tctccgcctt----ata---
-t---agctgtt-gatgctctgtagtggtctttactgattgtta--ca-gagtgcacggc
acgtttactttgaaaaaattagagtgctcaaagcatgcct--t--tgtgcttgaatag-t
ct-tgcatggaataatggaaaaggacttc---ggt-tct-attttgtt-g-gttttc-gg
t-t------cc-gaagtaa-tgattaaaagagacag-acgtgggcatttgtatggtggtg
ttagaggtga---aattcttggatcgccgccagacaaac-taccgcgaaagcatttgcca
aggatgctttcattaatcaagaacgaaagtcagaggttcgaagacgatcagataccgt-c
ctagttctgactataaactttaccgactaaca-atcaggagcgg-tta---gaat-ttat
tgaccctcctggctg-t-ccct-gggaaacc-tgaagtaa--aggttctggggggaatat
ggt-cacaaggctgaaacttaaaggaattgacggaagggcaccaccaggagtggagcctg
cggcttaatttgactcaacacggggaaactcacccggcccggacactggaaggatggaca
gat--tgacagctctttcttgattcagtgggtggtggtgcatggccgttcttagttggtg
gagtgatttgtctggttaa--ttccgataacgaacgagactctgtcctgc-taaatag--
---tacg--ctgttcttgggct---------catctg-------------------ggct
ttca-gacagt-gct--gac-ttcttagagggatacg-cggta------ttca-aaccgc
acgaaa-tagagcaataacaggtctgtgatgccctta-gatgtccggggccgcac-----
----------------------------------gcgcg-ctacaatgacagtatcagag
agtatta-ccacctggtccgaaa-ggattgggaaatctt--ggcaatattgtctcatcgg
ggattgagacttgtaattatttctcatgaacgaggaattcccagtagatgcaagtcatca
gcttgcgtcgattacgtccctgccctttgtacacaccgcccgtcgctactaccgattgaa
tggtttagtgaggtcctcggattgtggtctctgt------agt----------gcaaact
ac-------attg-actgtgag-aaga-cgatcgaac-ttgatcatttagaggaag--t-
aaaagtcgtaacaag---------------------------------------------
------------------------------------------------------------
------------------------------------------------------------
------------------------------------------------------------
------------------------------------------------------------
------------------------------------------------------------
-----------
>MH327508_Anoplodium_hymanae
------------------------------------------------------------
----------------------tactgat-atgcttgtctcaaagactaag-ccatgcat
gt-cgagttcaca-cc-c-ttgt-acggtgaaaccgcg-aatggctcattaaatcagcta
tgatttcttagatctta-cac--atttacttgg--ataactgtagtaattcta-gagcta
ataca-tgcc-ca---acaggccgtgttttt-----------acgagcgcggt-gggttt
atcag-ttca--aaacca-ac-cag--tt-------cgca---------ag---ggctg-
t-cgg------------------tttga-tg-actctggataac-ttc-c--ctgatcgc
atgg-cc--tagagccggcgacgtatc-tttcaagtgtctgacctatca-actttcgatg
gtaggtgctatgccta-ccatggtgataacgggtaacgggggatcagggtctgattccgg
agagggag-ccttagaaatggctaccacttctaaggaaggcagcaggcgcgcaacttacc
cacttgcagtgt-caagcagaggtagtga-cgataaataacaatgtgggactc-aaa-tg
aggctccacaattggaatggatacaa-tttaaatcc-ttt-aatgagtaacaattgg-ag
ggcaag-tctggtgccagcagccgcggtaattccagct-ccaatagcgtatattaaattt
gttgcagttaaaaagctcgtagttggatctcagg-tttg--------ggcagcaag-tat
aggcgata----------t------gcctatcacttgtctgcactgcctcatc-------
-----agtcgttcagttttctcaggtgctctttgttgagccgct--tg-agaaacacgac
aatattactttgaaaaaattagagtgctcaaagcaggcca-tta-tgcgcctctatac-t
gt-tgcatggcataacggaataggactcg---gtt-tct-attttgtt-g-gttttc-gg
t-gtta-cggc-cgagtaa-tgattaacaggagtagaacgggggctaaagtacggtcgcg
ttagaggtga---aattcttggatcgcggcctgactaac-tactgcgaaagcatttgcca
aggatgccttcattaatcaagaacgaaagtcagaggttcgaaagcgatcagataccgc-t
ctagttctgaccataaactatgccatctgact-attggaatgga-ctt---------tta
atgctattccagcag-t-ccct-gggaaaccttcaagac---aggttctggggggaatat
ggt-cgcaaggctgaaacttaaaggaattgacggaagggcaccaccaggagtggagcctg
cggcttaatttgactcaacacgggaaaactcacccggcccggacactgtaaggattgaca
gat--tgacagctctttcttgattcggtggatggtggtgcatggccgttcttagttggtg
gagtgatttgtctggttaa--ttccgataacgaacgagactctagcctgc-taaatag--
---tata--ctcataacatga---------attca--------------t--ttcgtgat
tgtgggtaat----a---ac-ttcttagagggattgg-cta------ttttca--ttagc
atgaaa-ttgagcaataacaggtctgtgatgccctta-gatgttcggggccgcac-----
----------------------------------gcgcg-ctacactgacagtgtcaaaa
agttat---acccttgtccgaga-ggattgggcaatctt-tcgaatcactgtctcgtcag
ggatcagggtttgtaattatcccctgtgaacgaggaattcccagtaagcacacgtcatca
gcttgtgctgattacgtccctgccctttgtacacaccgcccgtcgctactaccgattgga
tggtttagtgaggtcatcggatccggactggatg-a--a-gatctcgaat---gatgaa-
--tttc---ggcg-gtctagag-aaga-cgatcaaac-ttgattatctagaggaag--t-
aaaagtcgtaacaaggtt-tctgt------------------------------------
------------------------------------------------------------
------------------------------------------------------------
------------------------------------------------------------
------------------------------------------------------------
------------------------------------------------------------
-----------
>AY775777_Castrella_truncata
------------------------------------------------------------
-------------tcctgccagatttgat-atacttgtctcaaagattaag-ccatgcat
gtatcagttcacg-cc-t-ttat-acggcgaaaccgcg-aatggctcattaaatcagcta
ttgtttcttagatctta-caat--cctacttgg--ataactgtagtaattcta-gagcta
ataca-tgcc--a--a-tgtgctgcaaccgc-a----------aggttgtggc-gggttt
attag-atca--aaatca-ac-cggc--t-------ctc-----------g-g-gc-cg-
t-tgg------------------gctga-tg-actctggataac-catac--ctgaccgc
atga-cc--ctgtgtcggcggcgtatc-tttcaagtgtctgacctatca-actgtcgatg
gtgtgtgatttgctca-ccatggttatcacgggtaacggggaatcagtgtttgattccgg
agaggcag-ccttagaaacggctaccacatctaaggaaggcagcaggcgcgcaaattacc
cactctcagtt----cgaggaggtagtga-cgaaaaataacgatgcaagactc-actatg
aggccttgcaattggaatgagtacaa-tttaaatcc-ttt-aacgaggatcaattgg-ag
ggcaag-tctggtgccagcagccgcggtaattccagct-ccaatagcgtataaataaatt
gttgcagttaaaaagctcgtagttggatctcaggtg-tg-------agtcg-tcgg-tac
agtcttcg----tactg-t---------tactgtt-cgc-tctccaccttcat-------
-a---agctgtc-gatgccctgtggtgctctttattgagtgctg--ca-gggtgcgcagc
acgtttactttgaaaaaattagagtgctcaaagcaggcc---t--tgcgcctgaatag-t
ct-tgcatggaataatggaacaggacttc---ggt-tct-attttgtt-g-attttc-gg
t-a------tc-gaagtaa-tgattaaaagagacag-acgtgggcatttgtatggtggtg
ttagaggtga---aattcttggatcgccgccagacaaac-tactgcgaaagcatttgcca
aggatgccttcattaatcaagaacgaaagtcagaggttcgaagacgatcagataccgt-c
ctagttttgactataaactttaccgaccaaca-atcaggggtgg-tta---gaat-ttat
tgaccctcctggctg-t-ccct-gggaaacc-ttaagta---aggttctggggggaatat
ggt-cacaaggctgaaacttaaaggaattgacggaagggcaccaccaggagtggagcctg
cggcttaatttgactcaacacggggaaactcacccggcccggacactgtaaggatggaca
gat--tgacagctctttcttgattcagtgggtggtggtgcatggccgttcttagttggtg
gagtgatttgtctggttaa--ttccgataacgaacgagactctgtcctgc-taaatag--
---taca--tcgatcttggc--------------------------------acttgtgt
ctta-gtcgat-gat--gac-ttcttagaggtatacg-cggta------ttta-aaccgc
acgaaa-tagagcaataacaggtctgtgatgccctta-gatgtccggggccgcac-----
----------------------------------gcgcg-ctacaatgacagtatcaaag
agtatta-acacctagtccgaaa-ggattgggaaacctt--cgcattattgtcttatcag
ggattgagacttgtaattatttctcatgaacgaggaattcccagtaggcgcaagtcatca
gcttgcgtcgattacgtccctgccctttgtacacaccgcccgtcgctactaccgattgaa
tggtttagtgaggtccttggattgtgatctttgt------ggt----------gcaaatt
gc-------attg-attatgag-aaga-cgatcgaac-ttgatcatttagaggaag--t-
aaaagtcgtaacaaggtt-tccgtaggtgaacctgc-ag---------------------
------------------------------------------------------------
------------------------------------------------------------
------------------------------------------------------------
------------------------------------------------------------
------------------------------------------------------------
-----------
>AY775776_Gaziella_sp_WW2004
------------------------------------------------------------
---ctg-gtt-gatcctgccagtaattat-atgcttgtctcaaagattaag-ccatgcat
gtacaagttcaca-cc-t-tcat-acggtgaaaccgca-tatggctcattaaatcagcta
ttatttcttagatctca-ac---tcctacatgg--ataactgtggtaattcta-gagcta
atacg-tgcc--c--a-agtgttgcagccct------------gcgctgtggc-ggattt
attag-atca--aaacca-ac-cgg---c-------ttc-----------g-g--c-cg-
--------------------tccgttga-tg-actcttgataac-tg-tc--ctgatcgc
atga-cc--ttgtgtcggcgacgtatc-tttcaagtatctgccctatca-actgtcgttg
gtgagttaaatgctca-ccatggtgataacgggtaacggggaatcagggtttgattccgg
agagggag-ccttagaaatggctaccacatctaaggaaggcagcaggcgcgcaaattacc
cactctcagtt----cgaggaggtagtga-cgataaataacgatgcaagactc-atcatg
aggccttgcaattggaatgagtacaa-tttaaatcc-ttt-aacgaggatctattgg-ag
ggcaag-tctggtgccagcagccgcggtaattccagct-ccaatagcgtatattaaaatt
gttgcagttaaaaagctcgtagttggatctcaggtgctg-------agtcg-ctgg-tgc
agtttt-----ctgctg-t---------tacctag-cgt-gctccacctagcc-------
-c---agccgtatgttgcctatcggtgctctttactgagtgctg--tg-tggtactcggc
acgtttaccttgaaaaaattagagtgctcaaagcaggcct--t--ggtgcttgtatag-t
gt-tgcatggaataatggaatatgactcc---ggt-gct-attttgtt-g-gttttc-ag
t-a------ct-ggagtaattgattaatagagacag-acgggggcatttgtatggtggcg
ttagaggtga---aattcttggatcgtcgccagacaaac-tgcagcgaaagcgtttgcca
agtatgtcttctttaatcaagaacgaaagtcagaggctcgaagacgatcagataccgt-c
ctagttctgaccataaacgatgatgaccggca-atcaggggtgg-tta---ttctaccat
tgaccctcctggctg-t-cccc-gggaaacc-tggagca---aatttctggggggagtat
ggt-cacaaggaggaaacttaaaggaattgacggaagggcaccaccaggagtggagcctg
cggcttaatttgactcaacacggggaaacttacccggtccggacactggaaggattgaca
gat--tgatagctctttcatgattcagtgggtggtggtgcatggccgttcttagttggtg
gagtgatttgtctggttaa--ttccgataacgaacgagactctgtcctgc-taactag--
---tacg--ccgatatctggttgcat-------------------------tgcgcttcc
taaa-gtcggt-gct--gac-ttcttagagggatacg-cggta------ccca-aaccgc
acgaaa-tagagcaataacaggtctgtgatgccctta-gatgtccggggccgcac-----
----------------------------------gcgcg-ctacaatgacagtatcagca
agtatta-ctacctggtccgaaa-ggattgggaaacctt-atgaattattgtcacgacag
ggattggggtttgcaattgtcccccatgaacgaggaattcccagtaggtgcaagtcatca
ccttgtgccgattacgtccctgccctttgtacacaccgcccgtcgctactaccgattgaa
tggtttagtgaggtcttgggattgagggctctgt-g--a-t------------gcaaatc
ac-------actg-accttgaa-aagc-agatcaaac-ttgatcatttagaggaag--t-
aaaagtcgtaacaaggtt-ttcgtaggtgaacctgc-ag---------------------
------------------------------------------------------------
------------------------------------------------------------
------------------------------------------------------------
------------------------------------------------------------
------------------------------------------------------------
-----------
>AY775775_Castrada_sp_WW2004
------------------------------------------------------------
-------------tcctgccagcagtcat-atgcttgtctcaaagattaag-ccatgcat
gtccaagttcacg-cc-t-ttac-acggcgaaaccgcg-aatggctcattaaatcagcta
ttgtttcttagatctta-ccca-tactacatgg--ataactgcagtaattctg-gagcta
ataca-tgcc--a--a-tatgccttggcttt-a----------ttgctggggc-gggttt
attag-atca--aaacca-ac-cggc--c-------ttc---------acg-g-gc-tg-
t-ggg------------------tttga-tg-actctggataac-ca-ac--ctaatcgc
atga-cc--ttgtgtcggcgatgcatc-ttccaagtatctgacctatca-tctgtcgatg
gtgagtgatatgctca-ccatggagataacgggtaacggggaatcagtgttcgattccgg
agagggag-ccttagaaacggctaccacatctaaggaaggcagcaggcgcgcaaattacc
cactctcagcg----agaggaggtagtga-cgaaaaataacgatgcaagactc-attacg
aggccttgcaattggaatgagtacaa-tttaaatcc-ttt-aacgaggatccattgg-ag
ggcaag-tctggtgccagcagccgcggtaattccagctcccaatagcgtatattgaagtt
gttgcagttaaaaagctcgtagttggatctgaggtg-gg-------attcg-tcag-ttc
agc-tt-----gcgctg-c---------gactgta-cgt-gatctaccttaca-------
-c---agtcattagacgctttgtggtgctctttattgagtgctg--tg-aagtgcatggc
acgtttactttgaaaaaattaaagtgctcaaagcaggcct-----agtgcttgtatac-t
ct-tgcatggaataatggaataggacttc---ggt-tct-attttgtt-g-gttttc-gg
a-c------cc-ggagtaa-tgattaaaagagactg-ccgggggcatttgtatggtggcg
ttagaggtga---aattcttggatcgccgccagacaatc-tactgcgaaagcatttgcca
agaatgtcttcattaatcaagaacgaaagtcagaggttcgaagacgatcagataccgt-c
ctagttctgaccataaacgttgccgaccaaca-atcgggggtgg-ttt---gact-ttat
tgaccctcctggctg-t-ccct-gggaaacc-ttaagta---aggttctggggggaatat
ggt-cgcaaggccgaaacttaaaggaattgacggaagggcaccaccaggagtggagcctg
cggcttaatttgactcaacacggggaaactcacccggcccggacactgtaaggatggaca
gat--taaaagctctttcttgattcagtgggtggtggtgcatggccgttcttagttggtg
gagtgatttgtctggttaa--ttccgataacgaacgagactctgacctgc-taaatag--
---tacg--tcggtattggtgc----------tcagcaa------------t--gagtgc
tcta-gctggc-gct--gac-ttcttagagggattcg-cagta------ttta-aactgc
acgaaa-tagagcaataacaggtctgtgatgccctta-gatgtccggggccgcac-----
----------------------------------gcgcg-ctacaatgacagcttcagag
agttttg-caacctggtccgaga-ggattgggaaatctt--tgcatggctgtctcctcag
ggattggggtttgtaactgtcccccatgaacgaggaattcccagtaggcgcaagtcatca
gcttgcgccgattacgtccctgccctttgtacacaccgcccgtcgctactaccgattgaa
tggtttagtgaggtcctcggatcgcggtttttgc-g--a-tgg----------caacatt
gc-------attg-attgtgag-aaga-cgatcgaac-ttgatcatttagaggaag--t-
aaaagtcgtaacaaggtt-tccgtaggtgaacctgc-a----------------------
------------------------------------------------------------
------------------------------------------------------------
------------------------------------------------------------
------------------------------------------------------------
------------------------------------------------------------
-----------
>AY775774_Trisaccopharynx_westbladi
------------------------------------------------------------
------------------------------------------------------------
-----------------------------------gcg-aatggctcattaaatcagcta
taattccttagatctta-cgt---tctacttgg--ataactgtggtaattcta-gagcta
ataca-tgtc-at---ctatgccggagaaaacatctcggtgtttttcttgggt-ggactt
attag-atca--aaatca-ac-cgg--ct-------at-----------gc---cgcaa-
t----------------------tttga-tg-actctggataat-tta-c--ctgatcgc
atag-cc--ttgtgctggcgacgtatc-tttcaagtagctgccctatca-actttcgatg
gtaggagatttgccta-ccatggttataacgggtaacggggaatcagggtttgattccgg
agagggag-ccttagaaacggctaccacatctaaggaaggcagcaggcgcgcaaattacc
cacttgcagtgcgtgagtagaggtagtga-caataaataacaatgcagaactc-tta-tg
aggctctgcaattggaatgagacaga-tttaaatcc-ttt-aacgaggatcaattgg-ag
ggcaag-tctggtgccagcagccgcggtaattccagct-ccaatagcgtatattaaaatt
gttgcggttaaaaagctcgtagttgaatatcagg-ttgg--------agtatctta-tgg
gtcc-ttt----------t------gggctcatattgatgaatccacctcgtc-------
-----agccggtcagatacattgttccctcttaattgag--tga--ca-atgtgcacggc
atgtttactttgaaaaaattagagtgtttaaagcagacca-cttgtgagtctgaatgg-t
ga-tgcatggaataatggaataggactct---gga-tct-attttgtt-g-attttc-ag
t-act--aacc-agagtaa-tgattaaaaggggtagtacgggggcagaagtatggccgcg
ctagaggtga---aattcttggaccgtggccagactaac-tactgcgaaagcatctgcca
agtatgctttcattaatcaagaacgaaagtcagaggttcgaagacgatcagataccgt-c
ctagttctgaccataaactatgccaactgact-at-cagtccgt-ttt---------aaa
aaaacggtttagcag-t-cccc-gggaaaccttcaagtg---aggttccggggggaatat
ggt-cgcaagtctgaaacttaaaggaattgacggaagggcaccaccaggagtggagcctg
cggcttaatttgactcaacacgggaaaactcacccggcccggacactgtgaggattgaca
gat--tgaaagctctttctagattcagtggatggtggtgcatggccgttcttagttggtg
gagtgatttgtctggttaa--ttccgataacgaacgagactcaagcctac-taactag--
---gtag--cgcactagggg------------ctt--------------t--aaaccact
agtgtt-gct----a--cgc-ttcttagagggattgg-cgg------cattta--gtcgc
atgaga-ttgagcaataacaggtctgtgatgccctta-gatgtccggggctgcac-----
----------------------------------gcgcg-ctacattgacagtcacagaa
agaatat--acccttctccgaga-ggagcgggaaatctt-ctgaaagactggcacgtcag
ggatcagggtttgtaattataccctgtgaacgaggaattcccagtaagcgcaagtcatca
gcttgcgctgattacgtccctgccctttgtacacaccgcccgtcgctactaccgattgga
tgctttagtaagatcttcggactgggaggctgtg-g--a-gtgtc--------ttcggac
gctttg---agct-tttctgga-aaga-agatcaaat-ttgagtttctagaggaag--t-
aaaagtcgtaacaag---------------------------------------------
------------------------------------------------------------
------------------------------------------------------------
------------------------------------------------------------
------------------------------------------------------------
------------------------------------------------------------
-----------
>AY775773_Trigonostomum_denhartogi
------------------------------------------------------------
--ctgg-ttt-gatcctgccagtaattat-atgcttgtattaaagattaag-ccatgcat
gtataagtacaca-cc-t-ttat-acggtgagaccgcg-aatggctcattaaatcagcta
ttatttcttagatctta-ca-a--tttacttgg--ataactgtagtaattcta-gagcta
ataca-tttc--a--a-agtgccttagtctt-c-------gg-actcaagtgc-ggattt
attag-aaca--aaacca-ac-cag---t-------ttc-----------g-g--c-tg-
t-ttg------------------tttgt-aa-actctggataac-tt-at--cagatcgc
atgg-cc--ttgtgccggcgacatatc-tttcaagtggctgacctatca-actgacgttg
gtgagttatttgctca-ccatggtgttgacgggtaacggggaatcagggttcgataccgg
agagggag-ccttagaaacggctaccacatctaaggaaggcagcaggcgcgcaaattacc
cactctcagct----agaggaggtagtaa-cgataaataacaatgcaggactc-tttacg
aggctctgcaattggaatgagtacaa-tctaaatcc-ttt-aacgagtaccaattgg-ag
ggcaag-tctggtgccagcagccgcggtaattccagct-ccaatagcgtatattaaattt
gttgaagttaaaaagctcgtagttggatctcaggcc-ag-------atgtg-tcgg-tgt
ggtc-aat----ggcca-t---------ctccgtt-cat--atttgccttttt-------
-t---agctgtttgtctttttattgttctcttcactgagtgctt--ta-agaagctcggc
acgtttaccttgaaaaaatcagagtgcttaatgcaggcct--t--tgtgcttgtatgt-t
gt-tgcatggaataatggaataggacttc---ggt-tct-attttgtt-g-gttttc-gg
t-t------ct-gaagtaa-tgaataatagagacag-tcgggggcatttctatggctgtg
ttagaggtga---aattctgagatcgcagcccgagaaac-tattgcgaaagcatttgcca
agcatgtcttcattaatcaagaacgaaagtcagaggttcgaagacgatcagataccgt-c
ctagttctgaccttaaacgatgtagactaata-atcagaggtgg-tta---tatttttat
taatccttctggctg-t-tcct-gggaaaccttttagtg---gtattcttgggggaatat
gac-gacaacgttgnnncttaaaggaattgacggaagggcaccaccaggagtggagcctg
cggcttaatttgactcaacacggggaaactcacccggtccggacactgttaggatggaca
gat--tgatagctctttcttgattcagtgggtggtggtgcatggccgttcttagttggtg
gagtgatttgtctggttaa--ttccgataacgaacgagactctgtcctgc-taaatag--
---ttca--gtagcatcgg--------------ctgct-----------t-cattgtggc
taca-gcttct-gct--aac-ttcttagagggattcg-cgg-nn-----nnnn-nnnnnn
nnnnnn-nnnnnnnnnnnnnnnnnnnnnnnnnnnnnn-nnnnnnnnnnnnnnnnn-----
----------------------------------ncgcg-ctacattgacagtattaaca
agtaata-acacctggactgaaa-agttcgggaaatctt--tgaattactgtctccacag
ggattgaggtttgtaactatccctcatgaacgaggaattcccagtaggcgcaagtcatca
gcttgcgtcgattacgtccctgccctttgtacacaccgcccgtcgctactaccgattgag
tggattagtgaggccctcggatcgaagtttgagt-g--g-aa-----------ttttttc
at-------tcat-acattgaa-aagt-gggtcaaac-ttgttcatttagaggaag--t-
aaaagtcgtaacaaggtt-tccgtaggtgaacctgc-aga-tggatcaaggtgaacctgc
anatggatcaaggtgaacctgc--------------------------------------
------------------------------------------------------------
------------------------------------------------------------
------------------------------------------------------------
------------------------------------------------------------
-----------
>AY775771_Strongylostoma_elongatum
------------------------------------------------------------
---ctg-gtt-gatcctgccagcagtcat-atgcttgtctcaaagattaag-ccatgcat
gtccaagttcacg-cc-t-ttac-acggcgaaaccgcg-aatggctcattaaatcagcta
ttgtttcttagatctta-ccca-tactacatgg--ataactgcagtaattctg-gagcta
ataca-tgcc--a--attatgctgaggcttt-a----------ttgcttcggc-gggttt
attag-atca--aaatca-ac-cagc--t-------tc-----------ac-g-gc-tga
g-ttt------------------tttga-tg-actctggataac-ca-ac--ctgatcgc
atga-cc--ttgtgtcggcgacgcatc-ttccaagtatctgacctatca-tctgtcgatg
gtgagtgatatgctca-ccatggagatcacgggtaacggggaatcagtgttcgattccgg
agagggag-ccttagaaacggctaccacatctaaggaaggcagcaggcgcgcaaattacc
cactctcagcg----agaggaggtagtga-cgaaaaataacgatgcaagactc-atcatg
aggccttgcaatcggaatgagtacaa-tttaaatcc-ttt-aacgaggatcaattgg-ag
ggcaag-tctggtgccagcagccgcggtaattccagct-ccaatagcgtatattgaaatt
gttgcagttaaaaagctcgtagttggatctgaggtg-gg-------agtcg-tcag-ttc
agtttt-----tcgctg-c---------gactgta-tgt-actctaccttaca-------
-c---agtcattagacgatctgtggtgctctttattgagtgctg--ca-ggttgcatggc
acgtttactttgaaaaaattagagtgctcaaagcaggcca--t--tgtgcttgtataa-t
ct-tgcatggaataatggaataggacttc---ggt-tct-attttgtt-g-gttttc-gg
a-a------tc-ggagtaa-tgattaaaagagactg-ccgggggcatttgtatggtggcg
ttagaggtga---aattcttggatcgccgccagacaatc-tactgcgaaagcatttgcca
agaatgtcttcattaatcaagaacgaaagtcagaggttcgaagacgatcagataccgt-c
ctagttctgaccataaacgttgccgaccaaca-atcaagggtgg-ttt---gact-ttat
tgaccctcttggctg-t-ccct-gggaaacc-ttaagta---aggttctggggggaatat
ggt-cgcaaggccgaaacttaaaggaattgacggaagggcaccaccaggagtggagcctg
cggcttaatttgactcaacacggggaaactcacccggcccggacactgtaaggatggaca
gat--taaaagctctttcttgattcagtgggtggtggtgcatggccgttcttagttggtg
gagtgatttgtctggttaa--ttccgataacgaacgagactctaacctgc-taaatag--
---taca--ctggttttggcat----------tccattg------------taggagtgt
tttc-atcagt-gct--gac-ttcttagagggatttg-cagta------ttca-aactgc
acgaaa-aagagcaataacaggtctgtgatgccctta-gatgtccggggccgcac-----
----------------------------------gcgcg-ctacaatgacagtttcagaa
agtttta-caacctggtccgaaa-ggattggggaatctt--tgaaaagctgtctcctcag
ggattggggtttgtaattatcccccatgaacgaggaattcccagtaggcacaagtcatca
gcttgtgccgattacgtccctgccctttgtacacaccgcccgtcgctactaccgattgaa
tggtttagtgaggtcttcggaccgcggtctttgt-g--a-tgg----------caacatt
gc-------ttag-attgtgga-aaga-tgatcgaac-tttgatcattagaggaag--t-
aaaagtcgtaacaaggtt-tccgtaggtgaacctgc-aga-tggat--------------
------------------------------------------------------------
------------------------------------------------------------
------------------------------------------------------------
------------------------------------------------------------
------------------------------------------------------------
-----------
>AY775770_Ptychopera_westbladi
------------------------------------------------------------
---ctg-gtttgatcctgccagtaattat-atgcttgtctgaaagattaag-ccatgcat
gtataagtacaca-cc-t-taat-acggtgagaccgcg-aatggctcattaaatcagcta
ttatttcttagatctta-caca--tttacttgg--ataactgtagtaattcta-gagcta
ataca-tgtc--a--c-tgtgccacaaccgt-a-------a--ggttgtgtgc-ggattt
attag-aaca--aaacca-ac-cgg---c-------ttc-----------g-g--c-cg-
t-ct-------------------tttgg-tg-actctggataac-tt-ac--ctgatcgc
atgg-cc--ttgcgccggcgacgtatc-tttcaagtgtctgccctatca-actgacgttg
gtgaggtatttgctcacccatggtgttgacgggtaacggggaatcagggttcgataccgg
agagggag-ccttagaaacggctaccacatctaaggaaggcagcaggcgcgcaaattacc
cactctcagaa----tgaggaggtagtga-ccataaataacaatacaggactc-aaa-tg
aggctctgtaattggaatgagtacaa-tctaaatcc-ttt-aacgagtaccaattgg-ag
ggcaag-tctggtgccagcagccgcggtaattccagct-ccaatagcgtatattaaattt
gttgcagttaaaaagctcgtagttggatctcaggtg-ag-------gtgtg-tcgg-tgt
gttc-aat----gagca-t---------caccgtt-cat--gtctgcctttct-------
-c---agtcgtttgtcctctcatggttctcttaactgagtgcta--ta-agaggctcgac
acgtttaccttgaaaaaatcagagtgctcaaagcaggcct--t--tgcgcttgtatgt-t
gt-tgcatggaataatggaataggacttc---ggt-tct-attttgtt-g-gttttc-gg
t-g------cc-gaagtaa-tgaacaatagagacag-acgggggcatttctatggctgtg
atagaggtga---aattctgagaccgcagccagagaaac-tactgcgaaagcatttgcca
agcatgtcttcattaatcaagaacgaaagtcagaggttcgaagacgatcagataccgt-c
ctagttctgaccttaaacgatgccgtccgata-atcaggagtgg-tta----tattttat
taatcctcctggctg-t-ccct-gggaaa-c-cttagat---aggttctggggggaatat
ggt-cgcaaggttggaacttaaaggaattgacggaagggcaccaccaggagtggagcctg
cggcttaatttgactcaacacggggaaactcacccggtccggacactgtgaggattgaca
gat--tgatagctctttcttgattcagtgggtggtggtgcatggccgttcttagttggtg
gagtgatttgtctggttaa--ttccgataacgaacgagactctatcctgc-taaatag--
---tttg--gtggcatcgg--------------tcgct-------------tcg-gtgac
taaa-gctgct-a-a--aac-ttcttagagggattng-cggta------ttta-anccgc
acgaaa-gagagcaataacaggtctgtgatgccctta-gatgtccggggccgcac-----
----------------------------------gcgcg-ctacattgacagtatcagaa
agtaata-ccacctagctagaga-tagttgggaaatctt--tgaattactgtctccacag
ggattgaggtttgtaactatccctcatgaacgaggaattcccagtaggcgtaagtcatca
gcttacgtcgattacgtccctgccctttgtacacaccgcccgtcgctactaccgattgag
tggattagtgaggccctcagattgaggctttgat-g--g-c------------gaaagtc
ac-------taag-gtctcgaa-aagt-gggtcaaac-ttgttcatttagaggaag--t-
aaaagtcgtaacaaggtt-tccgtaggtgaacctgc-aga-tggatnaaggtgaacctgc
agatggatcaaggtgaacctgcanatggatcaaggtgaacctgca---------------
------------------------------------------------------------
------------------------------------------------------------
------------------------------------------------------------
------------------------------------------------------------
-----------
>AY775769_Ptychopera_plebeia
------------------------------------------------------------
---ctg-gtt-gatcctgccagtaattat-atgcttgtctgaaagattaag-ccatgcat
gtataagtacaca-cc-t-taaa-acggtgagaccgcg-aatggctcattaaatcagcta
tcatttcttagagctta-caca--tttacttgg--ataactctggtaattcta-gagcta
ataca-tgtc--a--c-tgtgctgcaaccga-a-------a--ggttgtatgc-ggattt
attag-aaca--aaacca-ac-tag---t-------cttc---------gg-a--c-tt-
t-at-------------------attgg-tg-actctggataac-tt-at--ctgatcgc
atgg-cc--ttgtgctggcgacgtatc-tttcaagtgtctgccctatca-actgacgttg
gtgtggtatttgctca-ccatggtgttgacgggtaacggggaatcagggttcgattccgg
agagggag-ccttagaaacggctaccacatctaaggaaggcagcaggcgcgcaaattacc
cactctcagaa----tgaggaggtagtga-ccataaataacaatacaggactc-aaa-tg
aggctctgtaattggaatgagtacaa-tgtaaaaac-tat-aacaagtaccaattgg-ag
ggcaag-tctggtgccagcagccgcggtaattccagct-ccaatagcgtatattaaagtt
gttgtggttaaaaagctcgtagttggatctcaggtg-ag-------gcgtg-tcgg-tgt
ggtc-aat----gatca-t---------aaccgtt-cat--gtctgcctttat-------
-c---agttgtatgtccttttatggttctcttaattgagtgcta--ta-atcggctcgac
acgtttaccttgaaaaaatcagagtgctcaaagcaagcct--t--tgtgcttacatgg-t
gt-tgcatggaataatgaaataggacttc---ggt-act-attttgtt-g-gttttc-at
t-a------ct-gaagtaa-tgaacaatagagactg-tcgggggcatttctatggttgtg
atagaggtga---aattctgagaccgcagccagagaaac-tactgcgaaagcatttgcca
agtatgtcttcattaatcaagaacgaaagtcagaggttcgaagacgatcagataccgt-c
ctagttctgaccttaaacaatgccgtccgata-attaggggtgg-tca----t-ttttat
tgactgccctagcta-t-ctct-gggaaa-c-ctcagaa---aggttccagggggaatat
ggt-cgcaagattggaacttaaaggaattgacggaagggcaccaccaggagtggagcatg
cggcttaatttgactcaacacgggaaaactcacccggtccggacactgtgaggattgaca
gat--tgatagctctttcttgattcagtgggtagtggtgcatggccgttcttagttggtg
gagtgatttgtctggttaa--ttccgataacgaacgagactctaacctgc-taaatag--
---tttg--atagcatcag--------------ttgct-------------tcg-gtgac
taca-gctata-a-a--aac-ttcttagagggattcg-cggta------ttta-aaccgc
aagaaa-gagagcaataacaggtctgtgatgccctta-gatgtccggggccgcac-----
----------------------------------gcgtg-ctacattgacagtatcaaaa
agtaatg-aaacctagctagaga-tagttgggaaatctt--tgaattactgtctccacag
ggatcggggtttgtaattatcccccgtgaacgaggaattccgagtaggcgcaagtcatca
gcttgcgtcgattacgtccctgccctttgtacacaccgcccgtcgctactaccgattgag
tggattagtgaggccctcggattgagtctttgat-g--g-t--------------tagcc
ag-------ataa-gtcttgaa-aagt-gggtcaaac-ttgttcatttagaggaag--t-
aaaagtcgtaacaaggtt-tccgtaggtgaacctgc-aga-tggat--------------
------------------------------------------------------------
------------------------------------------------------------
------------------------------------------------------------
------------------------------------------------------------
------------------------------------------------------------
-----------
>AY775768_Proxenetes_trigonus
------------------------------------------------------------
------------------ccagtaattat-atgcttgtctcaaagattaag-ccatgcat
gtataagtacaca-cc-t-taat-acggtgagaccgcg-aatggctcattaaatcagcta
ttatttcttagatctta-caca--attacttgg--ataactgtagtaattcta-gagcta
ataca-tgtc--a--a-tgtgccacagttt--------------actgtgtgc-ggattt
attag-aaca--aaacca-ac-cga---c-------ttc-----------g-g--t-cg-
t-att------------------attgg-tg-actctggataac-tc-tc--ctgatcgc
atgg-cc--ttgagccggcgacgtatc-tttcaagtgtctgccctatca-actgacgttg
gtgagttacttgctca-ccatggttttaacgggtaacggggaatcagggttcgataccgg
agagggag-ccttagaaatggctaccacatctaaggaaggcagcaggcgcgcaaattacc
cactctcagct----agaggaggtagtga-cgataaataacaatgcaggactc-aatacg
aggctctgcaattggaatgagtacaa-tttaaatcc-ttt-aacgagtatcaattgg-ag
ggcaag-tctggtgccagcagccgcggtaattccagct-ccaatagcgtatattaaattt
gttgcagttaaaaagctcgtagttggatctcaggta-ag-------gtgca-tcgg-agt
ggac-tat----gttca-t---------ctccgtt-tgt--atctgccttttt-------
-t---agctgttagtcttgctatggttctcttaactgagtgctg--ta-gtgagctcggc
acgtttaccttgaaaaaatcagagtgcttaaagcagg-ct--t--tgtgcttgtatgg-t
gt-tgcatggaataatggaataggacttc---gta-cct-attttgtt-g-gtttcc-gg
t-a------tc-gaagtaa-tgaacaatagagacag-tcgggggcatttctatggctgtg
ttagaggtga---aattctgagatcgcagccagagaaac-tactgcgaaagcatttgcca
agcatgtcttcattaatcaagaacgaaagtcagaggttcgaagacgatcagataccgt-c
ctagttctgaccttaaacgatgccgaccgata-atcaggggtgg-------ttttttttt
taaccctcctggctg-t-ccct-gggaaa-c-cttagtt---aggttctggggggattat
ggt-cacaaggttggaacttaaaggaattgacggaagggcaccaccaggagtggagcctg
cggcttaatttgactcaacacgggaaaactcacccggtccggacactgttaggatggaca
gat--tgatagctctttcttgattcagtgggtggtggtgcatggccgttcttagttggtg
gagtgatttgtctggttaa--ttccgataacgaacgagactctgtcctgc-taaatag--
---tcta--gtggcatcgg--------------ctgcc-----------t-cacggtggc
taca-gctact-act--gac-ttcttagagggattcg-cggta------ttta-agccgc
acgaaa-tagagcaataacaggtctgtgatgccctta-gatgtccggggccgcac-----
----------------------------------gcgcg-ctacattgacagtatcagca
agtattc-acacctggtctgaaa-agatcgggaaatctt--tgaattactgtctccacag
ggattgaggtttgcaactatccctcatgaacgaggaattcccagtaggcgcaagtcatca
gcttgcgtcgattacgtccctgccctttgtacacaccgcccgtcgctactaccgattgag
tggattagtgaggcccatggattgggaccttggt-g--g-ct-----------tttagtc
at-------cttg-gtactgct-aaat-gggtcaaac-ttgttcatttagaggaag--t-
aaaagtcgtaacaaggtt-tccgtaggtgaacctgc-ag---------------------
------------------------------------------------------------
------------------------------------------------------------
------------------------------------------------------------
------------------------------------------------------------
------------------------------------------------------------
-----------
>AY775767_Proxenetes_simplex
------------------------------------------------------------
---ctg-gtt-gatcctgccagtaattat-atgcttgtctcaaagattaag-ccatgcat
gtataagtacaca-cc-t-taat-acggtgagaccgcg-aatggctcattaaatcagcta
ttatttcttagatctta-caca--attacttgg--ataactgtagtaattcta-gagcta
ataca-tgtc--a--a-tgtgccacagttt--------------actgtgtgc-ggattt
attag-aaca--aaacca-ac-cga---c-------ttc-----------g-g--t-cg-
t-att------------------attgg-tg-actctggataac-tc-tc--ctgatcgc
atgg-cc--ttgagccggcgacgtatc-tttcaagtgtctgccctatca-actgacgttg
gtgagttacttgctca-ccatggttttaacgggtaacggggaatcagggttcgataccgg
agagggag-ccttagaaatggctaccacatctaaggaaggcagcaggcgcgcaaattacc
cactctcagct----agaggaggtagtga-cgataaataacaatgcaggactc-aatacg
aggctctgcaattggaatgagtacaa-tttaaatcc-ttt-aacgagtatcaattgg-ag
ggcaag-tctggtgccagcagccgcggtaattccagct-ccaatagcgtatattaaattt
gttgcagttaaaaagctcgtagttggatctcaggta-ag-------gtgca-tcgg-agt
ggac-tat----gttca-t---------ctccgtt-tgt--atctgccttttt-------
-t---agctgttagtcttgctatggttctcttaactgagtgctg--ta-gtgagctcagc
acgtttaccttgaaaaaatcagagtgcttaaagcagg-ct--t--tgtgcttgtatgg-t
gt-tgcatggaataatggaataggacttc---gta-cct-attttgtt-g-gtttcc-gg
t-a------tc-gaagtaa-tgaacaatagagacag-tcgggggcatttctatggctgtg
ttagaggtga---aattctgagatcgcagccagagaaac-tactgcgaaagcatttgcca
agcatgtcttcattaatcaagaacgaaagtcagaggttcgaagacgatcagataccgt-c
ctagttntgaccttaaacgatgccgaccgata-atcaggggtgg-------ttttttttt
taaccctcctggctg-t-ccct-gggaaa-c-cttagtt---aggttctggggggattat
ggt-cacaaggttggaacttaaaggaattgacggaagggcaccaccaggagtggagcctg
cggcttaatttgactcaacacgggaaaactcacccggtccggacactgttaggatggaca
gat--tgatagctctttcttgattcagtgggtggtggtgcatggccgttcttagttggtg
gagtgatttgtctggttaa--ttccgataacgaacgagactctgtcctgc-taaatag--
---tcta--gtggcatcgg--------------ctgcc-----------t-cacggtggc
taca-gctact-act--gac-ttcttagagggattcg-cggta------ttta-agccgc
acgaaa-tagagcaataacaggtctgtgatgccctta-gatgtccggggccgcac-----
----------------------------------gcgcg-ctacattgacagtatcagca
agtattc-acacctggtctgaaa-agatcgggaaatctt--tgaattactgtctccacag
ggattgaggtttgcaactatccctcatgaacgaggaattcccagtaggcgcaagtcatca
gcttgcgtcgattacgtccctgccctttgtacacaccgcccgtcgctactaccgattgag
tggattagtgaggcccatggattgggaccttggt-g--g-ct-----------tttagtc
at-------cttg-gtactgct-aaat-gggtcaaac-ttgttcatttagaggaag--t-
aaaagtcgtaacaaggtt-tccgtaggtgaacctgc-aga-tggat--------------
------------------------------------------------------------
------------------------------------------------------------
------------------------------------------------------------
------------------------------------------------------------
------------------------------------------------------------
-----------
>AY775766_Proxenetes_quadrispinosus
------------------------------------------------------------
-----g-gtt-gatcctgccagtaattat-atgcttgtctcaaagattaag-ccatgcat
gtataagtacaca-cc-t-taaa-acggtgagaccgcg-aatggctcattaaatcagcta
ttatttcttagatctta-caca--attacttgg--ataactgtagtaattcta-gagcta
ataca-tgtc--a--a-tgtgccgcagttt--------------actgtgtgc-ggattt
attag-aaca--aaacca-ac-cgg---c-------ttc-----------g-g--t-cg-
t-att------------------attgg-tg-actctggataac-tc-tc--ctgatcgc
atgg-cc--ttgagccggcgacgtatc-tttcaagtgtctgccctatca-actgacgttg
gtgagttacttgctca-ccatggttttaacgggtaacggggaatcagggttcgataccgg
agagggag-ccttagaaatggctaccacatctaaggaaggcagcaggcgcgcaaattacc
cactctcagct----cgaggaggtagtga-cgataaataacaatgcaggactc-aatacg
aggctctgcaattggaatgagtacaa-tttaaatcc-ttt-aacaagtatcaattgg-ag
ggcaag-tctggtgccagcagccgcggtaattccagct-ccaatagcgtatattaaattt
gttgcagttaaaaagctcgtagttggatctcaggta-ag-------gtgta-tcgg-tgt
ggcc-tat----ggtca-t---------ctccgtt-tat--atctgccttttt-------
-t---agctgttagtcttgctatggttctcttaattgagtgctg--ta-gtgagctcggc
acgtttaccttgaaaaaatcagagtgctcaaagcaggcct--t--tgtgcttgtatgg-t
gt-tgcatggaataatggaataggacttc---gta-cct-attttgtt-g-gtttcc-gg
t-a------tc-gaagtaa-tgaacaatagagacag-tcgggggcatttctatggctgtg
ttagaggtga---aattctgagatcgcagccagagaaac-tactgcgaaagcatttgcca
agcatgtcttcattaatcaagaacgaaagtcagaggttcgaagacgatcagataccgt-c
ctagttctgaccttaaacgatgccgrccgatw-atcaggggtgg-------ttttttttt
taaccctcctggctg-t-ccct-gggaaa-c-cttagtt---aggttctggggggattat
ggt-cacaaggttggaacttaaaggaattgacggaagggcaccaccaggagtggagcctg
cggcttaatttgactcaacacgggaaaactcacccggtccggacactgttaggatggaca
gat--tgatagctctttcttgattcagtgggtggtggtgcatggccgttcttagttggtg
gagtgatttgtctggttaa--ttccgataacgaacgagactctgtcctgc-taaatag--
---tcta--gtggcatcgg--------------ctgcc-----------t-aacggtggc
taca-gctact-act--gac-ttcttagagggattcg-cggta------ttta-aaccgc
acgaaa-tagagcaataacaggtctgtgatgccctta-gatgtccggggccgcac-----
----------------------------------gcgcg-ctacattgacagtatcaaca
agtattc-acacctggtctgaaa-agatcgggaaatctt--tgaattactgtctccacag
ggattgaggtttgcaactatccctcatgaacgaggaattcccagtaggcgcaagtcatca
gcttgcgtcgattacgtccctgccctttgtacacaccgcccgtcgctactaccgattgag
tggattagtgaggcccatggattgggactttgtt-g--g-c------------ttttgtt
aa-------catt-gttctgct-aaat-gggtcaaac-ttgttcatttagaggaag--t-
aaaagtcgtaacaaggtt-tccgtaggtgaacctgc-aga-tggat--------------
------------------------------------------------------------
------------------------------------------------------------
------------------------------------------------------------
------------------------------------------------------------
------------------------------------------------------------
-----------
>AY775765_Proxenetes_puccinellicola
------------------------------------------------------------
---ctg-gtt-gatcctgccagtaattat-atgcttgtctcaaagattaag-ccatgcat
gtataagtacaca-cc-t-taat-acggtgagaccgcg-aatggctcattaaatcagcta
ttatttcttagatctta-caca--attacttgg--ataactgtagtaattcta-gagcta
ataca-tgtc--a--a-tgtgccgcagttt--------------actgtgtgc-ggattt
attag-aaca--aaacca-ac-cgg---c-------ttc-----------g-g--c-cg-
t-att------------------attgg-tg-actctggataac-tc-tc--ctgatcgc
atgg-cc--ttgagccggcgacgtatc-tttcaagtgtctgccctatca-actgacgttg
gtgagttacttgctca-ccatggttttaacgggtaacggggaatcagggttcgataccgg
agagggag-ccttagaaatggctaccacatctaaggaaggcagcaggcgcgcaaattacc
cactctcagct----agaggaggtagtga-cgataaataacaatgcaggactc-aatacg
aggctctgcaattggaatgagtacaa-tttaaatcc-ttt-aacgagtaccaattgg-ag
ggcaag-tctggtgccagcagccgcggtaattccagct-ccaatagcgtatattaaattt
gttgcagttaaaaagctcgtagttggatctcaggta-ag-------gtgta-tcgg-tgt
ggcc-tat----ggtca-t---------ctccgtt-tat--atctgccttttt-------
-t---agctgttagtcttgctatggttctcttaattgagtgctg--ta-gtgagctcggc
acgtttaccttgaaaaaatcagagtgctcaaagcaggcct--t--tgtgcttgtatgg-t
gt-tgcatggaataatggaataggacttc---gta-cct-attttgtt-g-gtttcc-gg
t-a------tc-gaagtaa-tgaacaatagagacag-tcgggggcatttctatggctgtg
ttagaggtga---aattctgagatcgcagccagagaaac-tactgcgaaagcatttgcca
agcatgtcttcattaatcaagaacgaaagtcagaggttcgaagacgatcagataccgt-c
ctagttctgaccttaaacgatgccgaccgata-atcaggggtgg--------tttttttt
taaccctcctggctg-t-ccct-gggaaa-c-cttagtt---aggttctggggggattat
ggt-cacaaggttggaacttaaaggaattgacggaagggcaccaccaggagtggagcctg
cggcttaatttgactcaacacgggaaaactcacccggtccggacactgttaggatggaca
gat--tgatagctctttcttgattcagtgggtggtggtgcatggccgttcttagttggtg
gagtgatttgtctggttaa--ttccgataacgaacgagactctgtcctgc-taaatag--
---tcta--gtggcatcgg--------------ctgcc-----------t-cacggtggc
taca-gctact-act--gac-ttcttagagggattcg-cggta------ttta-anccgc
acgaaa-tagagcaataacaggtctgtgatgccctta-gatgtccggggccgcac-----
----------------------------------gcgcg-ctacattgacagtatcaaca
agtattc-acacctggtctgaaa-agatcgggaaatctt--tgaattactgtctccacag
ggattgaggtttgcaactatccctcatgaacgaggaattcccagtaggcgcaagtcatca
gcttgcgtcgattacgtccctgccctttgtacacaccgcccgtcgctactaccgattgag
tggattagtgaggcccatggattggtgtcttggt-g--g-ct-----------tttagtc
at-------cttg-gtactgct-aaat-gggtcaaac-ttgttcatttagaggaag--t-
aaaagtcgtaacaaggtt-tccgtaggtgaacctgc-aga-tggatcaaggtgaacctgc
ggatggat----------------------------------------------------
------------------------------------------------------------
------------------------------------------------------------
------------------------------------------------------------
------------------------------------------------------------
-----------
>AY775764_Proxenetes_flabellifer
------------------------------------------------------------
--ctgg-ttt-gatcctgccagtaattat-atgcttgtctcaaagattaag-ccatgcat
gtataagtacaca-cc-t-taat-acggtgagaccgcg-aatggctcattaaatcagcta
ttatttcttagatctta-caca--attacttgg--ataactgtagtaattcta-gagcta
ataca-tgtc--a--a-tgtgccacagttt--------------actgtgtgc-ggattt
attag-aaca--aaacca-ac-cgg---c-------ttc-----------g-g--c-cg-
t-att------------------attgg-tg-actctggataac-tc-tc--ctgatcgc
atgg-cc--ttgagctggcgacgtatc-tttcaagtgtctgccctatca-actgtcgttg
gtgagttacttgctca-ccatggttttaacgggtaacggggaatcagggttcgataccgg
agagggag-ccttagaaatggctaccacatctaaggaaggcagcaggcgcgcaaattacc
cactctcagct----agaggaggtagtga-cgataaataacaatgcaggactc-aatacg
aggctctgcaattggaatgagtacaa-tttaaatcc-ttt-aacgagtaccaattgg-ag
ggcaag-tctggtgccagcagccgcggtaattccagct-ccaatagcgtatattaaattt
gttgcagttaaaaagctcgtagttggatctcaggta-ag-------gtgta-tcgg-tgt
ggcc-tat----ggtca-t---------ctccgtt-tat--atctgccttttt-------
-t---agctgttagtcttgttatggttctcttaactgagtgcta--ta-gtgagctcggc
acgtttaccttgaaaaaatcagagtgctcaaagcaggcct--t--tgtgcttgtatgg-t
gt-tgcatggaataatggaataggacttc---gta-cct-attttgtt-g-gtttcc-gg
t-a------tc-gaagtaa-tgaacaatagagacag-tcgggggcatttctatggctgtg
ttagaggtga---aattctgagatcgcagccagagaaac-tactgcgaaagcatttgcca
agcatgtcttcattaatcaagaacgaaagtcagaggttcgaagacgatcagataccgt-c
ctagttttgaccttaaacgatgccgnccgata-atcnggggngg-------ttttttttt
taaccctcctggctg-t-ccct-gggaaa-c-cttagtt---aggttctggggggattat
ggt-cacaaggttggaacttaaaggaattgacggaagggcaccaccaggagtggagcctg
cggcttaatttgactcaacacgggaaaactcacccggtccggacactgttaggatggaca
gat--tgatagctctttcttgattcagtgggtggtggtgcatggccgttcttagttggtg
gagtgatttgtctggttaa--ttccgataacgaacgagactctgtcctgc-taaatag--
---tcta--gtggcatcgg--------------ctgcc-----------t-cacggtggc
taca-gctact-gct--gac-ttcttagagggnttnn-cggta------ttta-anccgc
acgaaa-tagagcaataacaggtctgtgatgccctnaggatgtccggggccnca------
-----------------------------------cgcg-ctacattgacagtatcaaca
agtattc-acacctggtctgaaa-agatcgggaaatctt--tgaattactgtctccacag
ggattgaggtttgcaactatccctcatgaacgaggaattcccagtaggcgcaagtcatca
gcttgcgtcgattacgtccctgccctttgtacacaccgcccgtcgctactaccgattgag
tggattagtgaggcccatggattgggaccttgtt-g--g-ct-----------tttagtc
at-------cttg-gttctgca-aaat-gggtcaaac-ttgttcatttagaggaag--t-
aaaagtcgtaacaaggtt-tccgtaggtgaacctgc-aga-tggatcaaggtgaacctgc
anatggatcaaggtgaacctgcanatggatcaaggtgaacctgcanatggatcaaggtga
acctgcanatggatcaaggtgaacctgcanatggatcaaggtgaacctgcaaatg-----
------------------------------------------------------------
------------------------------------------------------------
------------------------------------------------------------
-----------
>AY775763_Promesostoma_sp_WW2004
------------------------------------------------------------
------------------------------------------------------------
-----------------------------------gcg-aatggctcattaaatcagcta
ttatttattagatctta-caag--attacttgg--ataactgtagtaattcta-gagcta
ataca-tgaa--t--a-tgtgctttggttca------------caccaaatgc-gaattt
attag-atca--aaacca-ac-cgg---c-------ttc-----------g-g--c-cg-
t-t-a------------------attgg-tg-actctggataac-tt-at--ctgatcgc
atga-cc--ttgtgtcggcgacgtatc-tttcaagtgtctgacctatca-actt--gttg
gtgagttagttgctca-ccatggttataacgggtaacggagaatcagtgttcgataccgg
agagggag-ccttagaaacggctaccacatctaaggaaggcagcaggcgcgcaaattacc
cactctcagaa----cgaggaggtagtga-atttaaatagcgatgatgaactc-ttat-g
aggctcgtcaatcgaaatgagtacaa-tttaaatcc-ttt-aacgagtaccaattgg-ag
ggcaag-tctggtgccagcagccgcggtaattccagct-ccaatagcgaatattaaaatt
gttgcagttaaaaagctcgtagttggatccaaggtt-gg-------gcatg-cctg-tct
gttcttag----cagca-t---------gactgtg-tgt--gttcgcctttat-------
-t---agttgactgt-tcactatggtggttttaaccgactgcta--ta-gtgtgctcaac
acgtttaccttgaaaaaatcagagcgatccaggcaggcct--t--tgtgcttgtatgt-t
gt-tgcaaggaataatagaataggacttc---ggt-tct-attttgtt-g-gttttg-ag
a-a------tt-gaagtaa-tgaataatagagacag-tcgggggcatttgtatggtggcg
ttagaggtga---aattctgagatcgtcgccagacaaac-tactgcgaaagcatttgcca
agtatgtcttcattaatcaagaacgaaagtcagaggttcgaagacgatcagataccgt-c
ctagttctgaccataaacgatgccgacctaca-atcgggggtgg-t-----ttattacat
tgaccctcccggctg-t-cctc-aggaaa-c-tttaagt---tggttctggggggaatat
ggt-ctcaagactgaaacttaaaggaattgacggaagggcaccaccaggagtggagcctg
cggcttaatttgactcaacacggggaatctcacccggtccggacactggtaggatggaca
gat--tgatagctctttcttgattcagtgggtggtggtgcatggccgttcttagttggtg
gagtgatttgtctggttaa--ttccgataacgaacgagactctgtcctgc-taaatag--
---tcca--gtggcatcaa--------------tcactc----------t-----gtgat
taca-gctact-g-t--tac-ttcttagagggattcg-cgga-------ttta-aaccgc
aagaaa-tagagcaataacaggtctgtgatgccctta-gatgtccggggccgcac-----
----------------------------------gcgcg-ctacattgacagtaaaagcg
agtattt-ctacctggtccgaaa-ggattgggaaatctt--tgaattactgtctccacag
ggattgaggtttgcaattttgcctcatgaacgaggaattcccagtaggcgcaagtcatca
gcttgcgtcgattacgtccctgccctttgtacacaccgcccgtcgctactaccgattgag
tgcattagtgaggacctcggattgaaaacttagt-g--g-c------------gcaagtt
ac-------tttg-tttttgaa-aagt-ggttcaaat-ttgtgcatttagagatag--t-
aaaagtcgtaacaaggtt-tccgtaggtgaacctgc-aga-tggatca------------
------------------------------------------------------------
------------------------------------------------------------
------------------------------------------------------------
------------------------------------------------------------
------------------------------------------------------------
-----------
>AY775762_Phaenocora_unipunctata
------------------------------------------------------------
---ctg-gtt-gatcctgccagcagtcat-atgcttgtctcaaagattaag-ccatgcat
gtccaagttcacg-cc-t-ttac-acggcgaaaccgcg-aatggctcattaaatcagcta
ttgtttcttagatctta--cca-tactacatgg--ataactgcagtaattctg-gagcta
ataca-tgcc--a--a-tatgcctcggcttt-a----------ttgctgaggc-gggttt
attagaatca--aaacca-ac-cagt--c-------tt-----------cg-g-gc-tg-
t-ggg------------------tttga-tg-actctggataac-ca-ac--ctgatcgc
atga-cc--ttgcgtcggcgacaattc-ttccaagtatctgacctatca-tctgtcgatg
gtgagtgatatgctca-ccatggagatcacgggtaacggggaatcagtgttcgattccgg
agagggag-ccttagaaacggctaccacatctaaggaaggcagcaggcgcgcaaattacc
cactctcagcg----agaggaggtagtga-cgaaaaataacgatgcaagactc-attacg
aggccttgcaattggaatgagtacaa-tttaaatcc-ttt-aacgaggatccattgg-ag
ggcaag-tctggtgccagcagccgcggtaattccagct-ccaatagcgtatattgaagtt
gttgcagttaaaaagctcgtagttggatctgaggtg-gg-------agtcg-tcag-ttc
agc-tt-----gcgctg-c---------gactgta-cgt-gctctgccttaca-------
-c---agtcattagacattctgtggtgctctttactgagtgctg--cg-ggatgcatggc
acgtttactttgaaaaaattaaagtgctcaaagcaggcct--c--agtgcttgtatac-t
ct-tgcatggaataatggaataggacttc---ggt-tct-attttgtt-g-gttttc-gg
a-c------cc-ggagtaa-tgattaaaagagactg-ccgggggcatttgtatggtggcg
ttagaggtga---aattcttggatcgccgccagacaatc-tactgcgaaagcatttgcca
agaatgtcttcattaatcaagaacgaaagtcagaggttcgaagacgatcagataccgt-c
ctagttctgaccataaacgttgccgaccaaca-atcaggggtgg-ttt---gact-ttat
tgaccctcctggctg-t-ccct-gggaaacc-ttaagta---aggttctggggggaatat
ggt-cgcaaggccgaaacttaaaggaattgacggaagggcaccaccaggagtggagcctg
cggcttaatttgactcaacacggggaaactcacccggcccggacactgtaaggatggaca
gat--taaaagctctttcttgattcagtgggtggtggtgcatggccgttcttagttggtg
gagtgatttgtctggttaa--ttccgataacgaacgagactctgacctgc-taaatag--
---tacg--ttggtattttcac----------tcagcaa------------t--gagtgt
tctc-gctgac-gct--gac-ttnttagagggattng-cagta------ttca-anntgc
acgaga-tagagcaataacaggtctgtgatgccctta-gatgtccggggccgcnc-----
----------------------------------gcgcg-ctacaatgacagcttcagaa
agtttta-caacctggtccgaaa-ggattgggaaatctt--tgcataactgtcacctcag
ggattggggtttgtaactgtcccccatgaacgaggaattcccagtaggcgcaagtcatca
gcttgcgccgattacgtccctgccctttgtacacaccgcccgtcgctactaccgattgaa
tggtttagtgaggtcctcggatcgcggtccttgc-g--a-tgg----------caacatt
gc-------ttgg-attgtgag-aaga-cgatcgaac-ttgatcatttagaggaag--t-
aaaagtcgtaacaaggtt-tccgtaggtgaacctgc-a----------------------
------------------------------------------------------------
------------------------------------------------------------
------------------------------------------------------------
------------------------------------------------------------
------------------------------------------------------------
-----------
>AY775761_Olisthanella_truncula
------------------------------------------------------------
--------tt-gatcctgccagcagtcat-atgcttgtctcaaagattaag-ccatgcat
gtccaagttcacg-cc-c-ttgt-acggcgaaaccgcg-aatggctcattaaatcagcta
ttgtttcttagatctta--cca-tcctacatgg--agaactgcagtaattctg-gagcta
ataca-tgcc--a--a-tatgcttcggcttc-a----------ttgctgaggc-gggttt
attag-atca--aaacca-ac-cagt--c-------ttc---------acg-g-ac-tg-
a-ggg------------------tttga-tg-actctggataac-ca-ac--ctgatcgc
atga-cc--ttgcgtcggcgacaattc-ttccaagtatctgacctatca-tctgtcgatg
gtgagtgatatgctca-ccatggagatcacgggtaacggggaatcagtgttcgattccgg
agagggag-ccttagaaacggctaccacatctaaggaaggcagcaggcgcgcaaattacc
cactctcagcg----agaggaggtagtga-cgaaaaataacgatgcaagactc-attacg
aggccttgcaattggaatgagaacaa-tttaaatcc-ttt-aacgaggatccattgg-ag
ggcaag-tctggtgccagcagccgcggtaattccagct-ccaatagcgtatattgaagtt
gttgcagttaaaaagctcgtagttggatctgaggtg-gg-------agtcg-tcag-ttc
agc-tt-----gcgctg-c---------gactgta-cgt-gctctgccttaca-------
-c---agtcattagacgctctgtggtgctcttcactgagtgcta--tg-gagtgcatggc
acgtttactttgaaaaaattaaagtgctcaaagcaggcct--c--agtgcttgtatac-t
ct-tgcatggaataatggaataggacttc---ggt-tct-attttgtt-g-gttttc-gg
a-c------cc-ggagtaa-tgattaaaagagactg-ccgggggcatttgtatggtggcg
ttagaggtga---aattcttggatcgtcgccagacaatc-tactgcgaaagcatttgcca
agaatgtcttcattaatcaagaacgaaagtcagaggttcgaagacgatcagataccgt-c
ctagttctgaccataaacgttgccgaccaaca-atcgggggtgg-ttt---gact-ttat
tgaccctcctggctg-t-ccct-gggaaacc-ttaagta---aggttctggggggaatat
ggt-cgcaaggccgaaacttaaaggaattgacggaagggcaccaccaggagtggagcctg
cggcttaatttgactcaacacggggaaactcacccggcccggacactgtaaggatggaca
gat--taaaagctctttcttgattcagtgggtggtggtgcatggccgttcttagttggtg
gagtgatttgtctggttaa--ttccgataacgaacgagactctgacctgc-taaatag--
---tacg--tcggtattggcac----------tcagcaa------------t--gggtgt
tcta-gctggc-gct--gac-ttcttagagggattcg-cagta------ttca-aactgc
aagaaa-tagagcaataacaggtctgtgatgccctta-gatgtccggggccgcac-----
----------------------------------gcgcg-ctacaatgacagcttcagag
agttttg-caacctggtccgaaa-ggattgggaaatctt--tgcatagttgtctcctcag
ggattggggtttgtaactgtcccccatgaacgaggaattcccagtaggcgcaagtcatca
gcttgcgccgattacgtccctgccctttgtacacaccgcccgtcgctactaccgattgaa
tggtttagtgaggtcctcggatcgcggtctttgc-g--a-tgg----------aaacatt
gc-------ttgg-attgtgag-aaga-cgatcgaac-ttgatcatttagaggaag--t-
aaaagtcgtaacaaggtt-tccgtaggtgaacctgc-a----------------------
------------------------------------------------------------
------------------------------------------------------------
------------------------------------------------------------
------------------------------------------------------------
------------------------------------------------------------
-----------
>AY775760_Mesostoma_thamagae
------------------------------------------------------------
---ctg-gtt-gatcctgccagcagtcat-atgcttgtctcaaagattaag-ccatgcat
gtccaagttcacg-cc-t-taac-acggcgaaaccgcg-aatggctcattaaatcagcta
ttgtttcttagatctta-ccca-tactacatgg--ataactacagtaattctg-gagcta
ataca-tgcc--a--attatgcctcggcttt-a----------ttgctgaggc-gggttt
attag-atca--aaacca-at-cagc--c-------ttc---------acg-g-gc-tg-
t-ggg------------------tttga-tg-actctggataac-ca-ac--ctaatcgc
atga-cc--ttgcgtcggcgatgtatc-ttccaagtatctgacctatca-tctgtcgatg
gtgagttatatgctca-ccatggagataacgggtaacggggaatcagtgttcgattccgg
agagggag-ccttagaaacggctaccacatctaaggaaggcagcaggcgcgcaaattacc
cactctcagag----agaggaggtagtga-cgaaaaataacgatgcaagactc-attatg
aggccttgcaatcggaatgagtacaa-tttaaatcc-ttt-aacgaggatcaattgg-ag
ggcaag-tctggtgccagcagccgcggtaattccagct-ccaatagcgtatattgaaatt
gttgcagttaaaaagctcgtagttggatctgaggtg-gg-------agtcg-tcgg-ttc
agc-tt-----gcgctg-t---------gactgta-cgt-gctctaccttaca-------
-c---agtcattagacactctatggtgctctttactgagtgcta--ta-gagtgcatggc
acgtttactttgaaaaaattaaagtgctcaaagcaggcct--t--agtgcttgtatac-t
ct-tgcatggaataatggaataggacttc---ggt-tct-attttgtt-g-gttttc-gg
a-c------cc-ggagtaa-tgattaaaagggactg-ccgggggcatatgtattgtggcg
ttagaggtga---aattcttggatcgccgcaagacaacc-tactgcgaaagcatttgcca
agaatgtcttcattaatcaagaacgaaagtcagaggttcgaagacgatcagataccgt-c
ctagttctgaccataaacgttgccgacccaca-atcaggggtgg-ttt---gact-taat
ggaccctcctggctg-t-ccct-gggaaacc-ttaagta---aggttctggggggaatat
ggt-cgcaaggccgaaacttaaaggaattgacggaagggcaccaccaggagtggagcctg
cggcttaatttgactcaacacggggaaactcacccggcccggacactgtaaggatggaca
gat--taaaagctctttcttgattcagtgggtggtggtgcatggccgttcttagttggtg
gagtgatttgtctggttaa--ttccgataacgaacgagactctcacctgc-taaatag--
---tacg--tcggtactgacac----------tctc---------------g--cagtgt
tcta-gccggc-gct--gac-ttcttagagggattcg-cagta------ttta-aactgc
acgaaa-tagagcaataacaggtctgtgatgccctta-gatgtccggggccgcac-----
----------------------------------gcgcg-ctacaatgacagcttcagag
agtttta-aaacctggtccaaaa-ggattgggaaatctt--tgaatggctgtctcctcag
ggattggggtttgtaactgtcccccatgaacgaggaattcccagtaggcgcaagtcatca
gcttgcgccgattacgtccctgccctttgtacacaccgcccgtcgctactaccgattgaa
tggtttagtgaggtcctcggactgcggtcttagc-g--g-tgg----------caacact
gc-------tttg-attgtggg-aaga-cgatcgaac-ttgatcatttagaggaag--t-
aaaagtcgtaacaaggtt-tccgtaggtgaacctgc-ag---------------------
------------------------------------------------------------
------------------------------------------------------------
------------------------------------------------------------
------------------------------------------------------------
------------------------------------------------------------
-----------
>AY775759_Mesostoma_lingua
------------------------------------------------------------
---ctg-gtt-gatcctgccagcagtcat-atgcttgtctcaaagattaag-ccatgcat
gtccaagttcacg-cc-t-ttac-acggcgaaaccgcg-aatggctcattaaatcagcta
ttgtttcttagatctta-ccca-tactacatgg--ataactacagtaattctg-gagcta
ataca-tgcc--a--attatgcctcggcttt-g----------ttgctgaggc-gggttt
attag-atca--aaacca-at-cagc--c-------ttc---------acg-g-gc-tg-
c-ggg------------------tttga-tg-actctggataac-ca-ac--ctaatcgc
atga-cc--ttgcgtcggcgatgtatc-ttccaagtatctgacctatca-tctgtcgatg
gtgagttatatgctca-ccatggagataacgggtaacggggaatcagtgttcgattccgg
agagggag-ccttagaaacggctaccacatctaaggaaggcagcaggcgcgcaaattacc
cactctcagag----agaggaggtagtga-cgaaaaataacgatgcaagactc-attatg
aggccttgcaatcggaatgagtacaa-tttaaatcc-ttt-aacgaggatcaattgg-ag
ggcaag-tctggtgccagcagccgcggtaattccagct-ccaatagcgtatattgaaatt
gttgcagttaaaaagctcgtagttggatctgaggtg-gg-------agtcg-tcgg-ttc
agc-tt-----gcgctg-t---------gactgta-cgt-gctctaccttaca-------
-c---agtcattagacactctatggtgctctttactgagtgcta--ta-gagtgcatggc
acgtttactttgaaaaaattaaagtgctcaaagcaggcct--t--agtgcttgtatac-t
ct-tgcatggaataatggaataggacttc---ggt-tct-attttgtt-g-gttttc-gg
a-c------cc-ggagtaa-tgattaaaagggactg-ccgggggcatatgtattgtggcg
ttagaggtga---aattcttggatcgccgcaagacaacc-tactgcgaaagcatttgcca
agaatgtcttcattaatcaagaacgaaagtcagaggttcgaagacgatcagataccgt-c
ctagttctgaccataaacgttgccgacccaca-atcgggggtgg-ttt---gact-taat
ggaccctcctggctg-t-ccct-gggaaacc-ttaagta---aggttctggggggaatat
ggt-cgcaaggccgaaacttaaaggaattgacggaagggcaccaccaggagtggagcctg
cggcttaatttgactcaacacggggaaactcacccggcccggacactgtaaggatggaca
gat--taaaagctctttcttgattcagtgggtggtggtgcatggccgttcttagttggtg
gagtgatttgtctggttaa--ttccgataacgaacgagactctcacctgc-taaatag--
---tacg--tcggtattgacac----------tctc---------------g--tagtgt
tcta-gccggc-gct--gac-ttcttagagggattcg-cagta------ttta-aactgc
acgaaa-tagagcaataacaggtctgtgatgccctta-gatgtccggggccgcac-----
----------------------------------gcgcg-ctacaatgacagcttcagag
agtttta-aaacctggtccaaaa-ggattgggaaatctt--tgaatggctgtctcctcag
ggattggggtttgtaactatcccccatgaacgaggaattcccagtaggcgcaagtcatca
gcttgcgccgattacgtccctgccctttgtacacaccgcccgtcgctactaccgattgaa
tggtttagtgaggtcctcggactgcggtcttagc-g--g-tgg----------caacact
gc-------tttg-attgtggg-aaga-cgatcgaac-ttgatcatttagaggaag--t-
aaaagtcgtaacaaggtt-tccgtaggtgaacctgc-aga-tggat--------------
------------------------------------------------------------
------------------------------------------------------------
------------------------------------------------------------
------------------------------------------------------------
------------------------------------------------------------
-----------
>AY775758_Litucivis_serpens
------------------------------------------------------------
---ctg-gtt-gatcctgccagtaattat-atgcttgtctcaaagattaag-ccatgcat
gtatcagtacaca-cctt-ttat-acggtgagaccgcg-aatggctcattaaatcagcta
ttatttcttagatctta-caga--attacttgg--ataactgtagtaattcta-gagcta
ataca-tgaa--a--tgagtgcctcagtctt------------gactgggtgc-ggattt
attag-aaca--aaacca-ac-cga---c-------ttc-----------g-g--t-cg-
c-atg------------------tttgg-tg-actctggataac-tt-ac--ctgatcgc
atgg-cc--ttgagtcggcgacgtatc-tttcaagtgtctgccctatca-actgacgttg
gtgagttacatgctca-ccatggtgataacgggtaacggggaatcagggttcgataccgg
agagggag-ccttagaaatggctaccacatctaaggaaggcagcaggcgcgcaaattacc
cactctcagat----agaggaggtagtga-cgataaataacaatgcaggactc-attatg
aggctctgcaattggaatgagtacaa-tttaaatcc-ttt-aacgagtaccaattgg-ag
ggcaag-tctggtgccagcagccgcggtaattccagct-ccaatagcgtatattaaaatt
gttgcagttaaaaagctcgtagttggatctcaggta-ag-------gtgtg-tcgg-tgt
ggtc-tat----gatca-t---------ctccgtt-cgc--atctgcctttct-------
-t---agctgtttgtctctttacggttctctttattgagtgctg--ta-gagtgctcggc
acgtttaccttgaaaaaatcagagtgcttaaagcaggcc---t--tgtgcttgaatga-t
gg-tgcatggaataatggaataggacttc---ggt-tct-attttgtt-g-gttttc-gg
t-a------tc-gaagtaa-tgaacaatagagacag-acgggggcatttctatggctgtg
ttagaggtga---aattctgagatcatagccagagagac-tactgcgaaagcatttgcca
agcatgtcttcattaatcaagaacgaaagtcagaggttcgaagacgatcagataccgt-c
ctagttctgacc-taaacgatgccgaccgaca-atcaggggtgg-tta---ttttactat
tgaccctcctggctg-t-ccct-gggaaacc-tgtagta---tggttctggggggaatat
ggt-cgcaagacggaaacttaaaggaattgacggaagggcaccaccaggagtggagcctg
cggcttaatttgactcaacacggggaaactcacccggtccggacactgtgaggatggaca
gat--tgatagctctttcttgattcagtgggtggtggtgcatggccgttcttagttggtg
gagtgatttgtctggttaa--ttccgataacgaacgagactttgtcctgc-taactag--
---ttca--gcggcatctg--------------ttgcc-----------t-tcgggtagc
taca-gctgct-gca--aac-ttcttagagggattcg-cggta------caca-agccgc
acgaaa-aagagcaataacaggtctgtgatgccctta-gatgtccggggccgcac-----
----------------------------------gcgcg-ctacattgacagtatcaaca
agtattt-ccacctggtctgaaa-agattgggaaatctt--agaattactgtctccacag
ggattgaggtttgcaactatccctcatgaacgaggaattcccagtaggcgcaagtcatca
gcttgcgtcgattacgtccctgccctttgtacacaccgcccgtcgctactaccgattgag
tggattagtgaggccctcggattgagaactttgt-g--a-t------------gaaagtt
ac-------atcg-tttttgag-aagt-gggtcaaac-ttgttcatttagaggaag--t-
aaaagtcgtaacaaggtt-tccgtaggtgaacctgc-aga-tggat--------------
------------------------------------------------------------
------------------------------------------------------------
------------------------------------------------------------
------------------------------------------------------------
------------------------------------------------------------
-----------
>AY775757_Einarella_argillophyla
------------------------------------------------------------
------------------------------------------------------------
-----------------------------------gcg-aatggctcattaaatcagcta
tgatttcttagatctta-cac-catttacttgg--ataactgtagtaattcta-gagcta
atacg-tgtt-aaagcagaccttggacgtctctctcgggag-atgttctcggt-gaattt
attag-aaca--aaacca-ac-cag--tc-------tt-----------cg---gactg-
c-cgg------------------tttga-tg-actctggataac-tga-t--ctgaccgc
atga-cc--ttgagtcggcggcgtatc-tttcaagtgtctgccctatca-actgtcgatg
gtgagtgctatgctca-ccatggtgatcacgggtaacggggaatcagggttcgattccgg
agagggag-ccttagaaacggctaccacatctaaggaaggcagcaggcgcgcaaattacc
cacttgcagtgt-cttgcagaggtagtga-cgataaataacaatgcaggactc-cta-tg
aggccctgcaattggaatgagaacaa-tttaaatcc-ttt-aacgaggatcaaatgg-ag
ggcaag-tctggtgccagcagccgcggtaattccagct-ccattagcatatattaaaatt
gttgcagttaaaaagctcgtagttggatctcaggtttgg--------aagccttgg-tga
gcct-aca----------t------gggttctactagggtcatccgcctcatt-------
-----agccggtgagttactgtgattgcacttaattgag--cgt--tg-cagtgcacggc
atgtttactttgaaaaaattagagtgctcaaaacaggcca-ttt-tgcgcctgaatac-t
gt-tgcatggaataatggaataggactct---ggt-tct-gttttgtt-g-gttttc-gg
[truncated: 622,124 more chars]
