# Supplementary material for: Biodiversity between sand grains: Meiofauna composition across southern and western Sweden assessed by metabarcoding
Source: Biodivers Data J. 2020 Apr 27;8:e51813. doi: 10.3897/BDJ.8.e51813 (PMC7198628; doi:10.3897/BDJ.8.e51813)
Supplement: Supplementary material 15 — Supplemental Data 15 [file bdj-08-e51813-s015.jplace]

{"tree":
  "(((JF357663_Turbanella_cornuta:1e-06{0},AY228139_Paraturbanella_dohrni:0.001251{1}):0.00889791{2}[97],(((((((KR072683_Thaidasys_tongiorgii:0.225139{3},(AM231779_Macrodasys_caudatus:0.118173{4},(KM289034_Macrodasys_cf_achradocytalis:0.321323{5},(JF357670_Macrodasys_sp_2:0.00276469{6},(AY239040_Macrodasys_buddenbrocki:0.00418584{7},AY963692_Macrodasys_buddenbrocki:1e-06{8}):0.0125719{9}[96]):0.104457{10}[98]):0.07467{11}[93]):0.329481{12}[100]):0.0691106{13}[97],(((((KC193098_Dactylopodola_baltica:0.0904066{14},JF357650_Dactylopodola_cf_baltica:0.175436{15}):0.0352732{16}[97],((AY228134_Dactylopodola_typhle:0.0409739{17},JF970235_Dactylopodola_sp:0.1147{18}):0.0225408{19}[92],(JF357651_Dactylopodola_mesotyphle:0.0487558{20},JF357653_Dactylopodola_typhle:0.121811{21}):0.0123345{22}[75]):0.0361783{23}[97]):0.289329{24}[100],((JN203487_Dactylopodola_agadasys:0.26698{25},(MF577023_Redudasys_neotemperatus:0.00424541{26},JN203489_Redudasys_fornerise:0.0266023{27}):0.137943{28}[100]):0.121582{29}[100],(AM231778_Dolichodasys_sp:0.210079{30},((JN099881_Paradasys_subterraneus:0.194862{31},AY963691_Cephalodasys_sp:0.0823114{32}):0.0878154{33}[96],LC018992_Cephalodasys_mahoae:0.383177{34}):0.183275{35}[100]):0.0276481{36}[70]):0.0399327{37}[98]):0.0187819{38}[88],(((JN203486_Pleurodasys_helgolandicus:0.197754{39},AY228133_Xenodasys_sp:0.211957{40}):0.0206352{41}[78],KM289052_Urodasys_viviparus:0.118004{42}):0.0302654{43}[91],((KM083602_Hummondasys_jamaicensis:0.139691{44},(((((MF325875_Chaetonotus_gelidus:5.22677{45},MF325889_Chaetonotus_subtilis:4.05361{46}):2.55964{47}[98],(MF325885_Chaetonotus_jaceki:5.4833{48},(MF325869_Chaetonotus_bombardus:3.07887{49},(MF325874_Chaetonotus_hornsundi:0.520326{50},MF325868_Chaetonotus_boreali:0.876571{51}):2.18468{52}[99]):1.26821{53}[84]):0.478171{54}[74]):2.83386{55}[100],(JQ798558_Chaetonotus_mariae:0.0109165{56},(((JQ798566_Chaetonotus_cf_novenarius:0.0239747{57},(((((((((JN185468_Lepidodermella_intermedia:0.0909355{58},JN185474_Lepidodermella_minus_minus:0.0231804{59}):0.0298338{60}[99],(JQ798569_Chaetonotus_acanthocephalus:0.0303977{61},(JN185505_Aspidiophorus_tetrachaetus:0.0300363{62},(JQ798547_Chaetonotus_heideri:0.0243236{63},JQ798544_Chaetonotus_acanthodes:0.0174411{64}):0.00536129{65}[83]):0.00449496{66}[56]):0.00293196{67}[80]):0.00192277{68}[16],KP713403_Bifidochaetus_arcticus:0.0265612{69}):0.0052353{70}[48],JQ798573_Ichthydium_skandicum:0.0113896{71}):0.00678999{72}[92],((JN185458_Lepidochaetus_brasilense:0.0173556{73},(JN185495_Lepidochaetus_brasilense:0.00720626{74},JN185503_Lepidochaetus_zelinkai:0.0196629{75}):1e-06{76}[0]):0.00603972{77}[90],(KX159486_Cephalionotus_kisielewskii:0.0211777{78},JQ798594_Chaetonotus_armatus:0.0172389{79}):1e-06{80}[0]):0.00274545{81}[75]):0.00471027{82}[90],JQ798555_Chaetonotus_sp_2:0.00739972{83}):0.011216{84}[99],(JQ798596_Chaetonotus_schultzei:0.0193128{85},(JQ798540_Chaetonotus_uncinus:0.0152263{86},(JQ798604_Chaetonotus_cf_sphagnophilus:0.0131667{87},((((JQ798567_Haltidytes_squamosus:0.0072114{88},JQ798562_Ornamentula_paraensis:0.0139026{89}):0.0141166{90}[99],(((JQ798568_Dasydytes_elongatus:0.0208489{91},JQ798564_Dasydytes_papaveroi:0.010924{92}):0.00510146{93}[92],(JN185471_Stylochaeta_fusiformis:0.00118478{94},JN185491_Stylochaeta_scirtetica:0.00237185{95}):1e-06{96}[0]):0.0018921{97}[78],(((JQ798587_Chaetonotus_sp:0.0346845{98},JQ798589_Chaetonotus_bisacer:0.0601768{99}):0.0210536{100}[98],JQ798570_Dasydytes_carvalhoae:0.041793{101}):0.00886328{102}[43],JQ798543_Chaetonotus_heterocanthus:0.0172211{103}):0.0098508{104}[96]):0.00319078{105}[15]):0.00218678{106}[83],((KR822113_Kijanebalola_devestiva:0.00690618{107},(KR822110_Neogossea_antennigera:0.00748487{108},KR822114_Neogossea_acanthocolla:0.00818879{109}):0.00116194{110}[46]):0.00267351{111}[88],Chaetonotus_AJ0017351:0.0106388{112}):1e-06{113}[0]):0.00400394{114}[87],JN185473_Polymerurus_nodicaudus:0.00967811{115}):0.00194879{116}[75]):0.00991849{117}[95]):0.00522683{118}[82]):0.00268456{119}[43]):0.00649602{120}[93],(JQ798580_Chaetonotus_laroides:0.00959354{121},((((JQ798551_Halichaetonotus_euromarinus:0.0146639{122},JQ798560_Halichaetonotus_sp_4:0.0351958{123}):0.0160769{124}[97],(JQ798541_Heterolepidoderma_loricatum:0.0429165{125},MK302474_Heterolepidoderma_sinus:0.108187{126}):0.00846702{127}[76]):0.00745813{128}[91],((JQ798550_Halichaetonotus_aculifer:1e-06{129},KF159023_Halichaetonotus_schromi:0.0224261{130}):0.0120332{131}[98],(JQ798599_Halichaetonotus_paradoxus:0.0155647{132},JQ798600_Halichaetonotus_sp_2:0.0286317{133}):0.00575323{134}[91]):0.00535791{135}[80]):0.011328{136}[97],(KX538804_Chaetonotus_antrumus:0.0267793{137},(((JN185485_Heterolepidoderma_sp_2:0.0103424{138},(JQ798576_Chaetonotus_cf_oculifer:0.00917262{139},JN185480_Heterolepidoderma_acidophilum:0.0031131{140}):0.0117587{141}[98]):0.0139404{142}[92],JQ798607_Ichthydium_squamigerum:0.10799{143}):0.0174819{144}[94],JN185469_Heterolepidoderma_macrops:0.0161357{145}):0.0056581{146}[80]):0.0101954{147}[94]):0.00403019{148}[49]):0.00287709{149}[83]):0.00478464{150}[91],(((MH425551_Chaetonotus_sp_A:0.0288325{151},(JQ798563_Chaetonotus_polyspinosus:0.0109539{152},JQ798537_Arenotus_strixinoi:0.0121834{153}):0.000989943{154}[63]):0.0192549{155}[100],((JQ798557_Chaetonotus_hystrix:0.0298299{156},JQ798556_Chaetonotus_aemilianus:0.00904572{157}):0.0340962{158}[100],((JQ798605_Chaetonotus_microchaetus:0.0234773{159},JN185478_Lepidodermella_squamata:0.0398677{160}):0.0166475{161}[99],JQ798578_Chaetonotus_similis:0.00970267{162}):0.00563698{163}[89]):0.00464413{164}[64]):0.0024563{165}[86],(JQ798577_Chaetonotus_cf_maximus:0.0181791{166},(JN185463_Aspidiophorus_ophiodermus:0.00680519{167},(JQ798545_Chaetonotus_daphnes:0.0218042{168},JQ798572_Heterolepidoderma_sp_3:0.0161427{169}):1e-06{170}[0]):0.00485025{171}[93]):0.00396156{172}[89]):0.00278532{173}[85]):0.00610358{174}[87]):0.0144606{175}[97],(JQ798561_Chaetonotus_cf_dispar:0.0043192{176},JQ798539_Chaetonotus_neptuni:0.0331291{177}):0.00382744{178}[18]):0.0101864{179}[87],((JQ798538_Aspidiophorus_paramediterraneus:0.0741536{180},JQ798553_Aspidiophorus_tentaculatus:0.0611845{181}):0.0323703{182}[95],AY228126_Aspidiophorus_polystictos:0.0532286{183}):0.0585804{184}[99]):0.0306015{185}[57]):0.206172{186}[95]):0.0259168{187}[72],(((JF970232_Draculiciteria_sp:0.06437{188},KP878706_Draculiciteria_tesselata:0.0515174{189}):0.0483466{190}[90],JN185470_Draculiciteria_tesselata:0.0502187{191}):0.252595{192}[100],((JF357664_Xenotrichula_intermedia:0.343701{193},(JF970233_Heteroxenotrichula_squamosa:0.458119{194},(JN185499_Xenotrichula_velox:1e-06{195},AY239041_Xenotrichula_sp_aff_velox:0.0165897{196}):0.440247{197}[100]):0.176859{198}[99]):0.0812517{199}[96],((JN185464_Xenotrichula_punctata:0.147563{200},JF970234_Xenotrichula_sp:0.160906{201}):0.112352{202}[99],JN185466_Xenotrichula_sp_1:0.230095{203}):0.458568{204}[100]):0.111875{205}[100]):0.0691742{206}[98]):0.0172{207}[6],(KX531005_Diuronotus_aspetos:0.236296{208},(Musellifer_delamarei_AM231775:0.152828{209},KF578503_Musellifer_reichardti:0.194235{210}):0.206382{211}[99]):0.142554{212}[100]):0.107637{213}[100]):0.0224299{214}[60],((((JF970239_Platydasys_sp:0.0461758{215},JF357625_Oregodasys_ruber:0.051069{216}):0.0077916{217}[79],(JF357642_Oregodasys_ocellatus:0.00664486{218},JF357626_Oregodasys_tentaculatus:0.0155739{219}):0.0154895{220}[90]):0.100728{221}[100],(((JF357671_Thaumastoderma_moebjergi:0.109157{222},JF357631_Thaumastoderma_ramuliferum:0.0776878{223}):0.124021{224}[100],JF357629_Tetranchyroderma_quadritentaculatum:0.253978{225}):0.015026{226}[83],(((JF357630_Tetranchyroderma_thysanophorum:1e-06{227},(KC193100_Tetranchyroderma_megastomum:0.00138055{228},JF357672_Tetranchyroderma_sp_1:0.0266923{229}):0.00257747{230}[88]):0.0176985{231}[94],(JF357635_Tetranchyroderma_cirrophorum:0.00721648{232},(JF357636_Tetranchyroderma_pachysomum:0.0509131{233},((((JF357648_Tetranchyroderma_sp_3:0.0500715{234},JF357643_Ptychostomella_sp_1:0.0169617{235}):0.00490755{236}[79],(JF357634_Ptychostomella_tyrrhenica:0.0876017{237},KF921018_Ptychostomella_sp:0.0587175{238}):0.0359153{239}[100]):0.00979396{240}[93],(JF357644_Tetranchyroderma_sp_4:0.0766206{241},((AY963688_Tetranchyroderma_sp_aff_paradoxa:1e-06{242},AY240950_Tetranchyroderma_sp_aff_paradoxa:1e-06{243}):0.0646584{244}[100],((JF357627_Tetranchyroderma_esarabdophorum:0.00784715{245},JF357637_Tetranchyroderma_papii:0.0262165{246}):0.00141153{247}[69],(DQ079911_Tetranchyroderma_sp:0.0326329{248},JF357645_Tetranchyroderma_cf_antennatum:0.0088138{249}):0.00326353{250}[79]):0.0233163{251}[99]):0.0279936{252}[100]):1e-06{253}[0]):0.0179282{254}[99],JF357628_Tetranchyroderma_hirtum:0.0264177{255}):0.00732884{256}[89]):0.00348057{257}[29]):0.0122495{258}[90]):0.0289203{259}[94],JF357633_Pseudostomella_etrusca:0.0712611{260}):0.012555{261}[87]):0.0402522{262}[96]):0.0968412{263}[100],(JF357641_Diplodasys_sp:0.109407{264},((JF357639_Acanthodasys_aculeatus:1e-06{265},JF357638_Acanthodasys_sp_A:1e-06{266}):0.175363{267}[100],(AY218101_Acanthodasys_sp:0.0506756{268},(JF357632_Diplodasys_meloriae:0.0744813{269},JF357667_Diplodasys_ankeli:0.0577192{270}):0.0376605{271}[98]):0.0202305{272}[85]):0.0281035{273}[90]):0.154521{274}[100]):0.0944709{275}[100]):0.0237196{276}[79]):0.00126217{277}[0]):0.0246778{278}[55],((KM289065_Urodasys_mirabilis:0.0638795{279},(AY218102_Urodasys_sp:1e-06{280},DQ079912_Urodasys_sp:1e-06{281}):0.0696558{282}[97]):0.22335{283}[100],((AM231776_Cephalodasys_turbanelloides:1e-06{284},AM231781_Paradasys_sp:0.0116163{285}):0.365522{286}[100],(((JQ798535_Neodasys_chaetonotoideus:0.0294531{287},JQ798536_Neodasys_uchidai:0.00234882{288}):0.0299897{289}[61],AY963687_Neodasys_sp:0.0675631{290}):0.0149212{291}[65],AY228127_Neodasys_ciritus:0.122398{292}):0.319827{293}[100]):0.0542479{294}[44]):0.0403587{295}[94]):0.0187228{296}[70]):0.0101494{297}[38],(((JF357657_Mesodasys_laticaudatus:0.0225423{298},(AY240949_Mesodasys_sp:1e-06{299},AY963690_Mesodasys_sp:1e-06{300}):0.0665591{301}[100]):0.0405577{302}[100],(AM231780_Mesodasys_adenotubulatus:0.0327041{303},(JF357658_Mesodasys_littoralis:1e-06{304},AY228132_Mesodasys_laticaudatus:0.00226965{305}):0.0452829{306}[100]):0.0308982{307}[99]):0.106793{308}[100],(JF357665_Lepidodasys_unicarenatus:0.238354{309},(AY228130_Lepidodasys_sp:0.391837{310},(AY228129_Lepidodasys_unicarenatus:0.101616{311},AY963689_Lepidodasys_sp:0.0482153{312}):0.216926{313}[100]):0.209319{314}[100]):0.110352{315}[99]):0.0253212{316}[89]):0.0170405{317}[91],((JF357655_Megadasys_sp:0.00578514{318},AY228131_Megadasys_minor:0.00127977{319}):0.198727{320}[100],(DQ079910_Megadasys_sp:0.131706{321},(JF970237_Crasiella_sp:0.0745336{322},JN203488_Crasiella_sp:0.0935364{323}):0.104154{324}[100]):0.0247502{325}[61]):0.0593337{326}[99]):0.133794{327}[100],(KF921017_Paraturbanella_sp:0.108327{328},(JF357660_Paraturbanella_pallida:0.121815{329},(JF357659_Paraturbanella_dohrni:0.0215927{330},AY228138_Paraturbanella_teissieri:0.00813831{331}):0.0564524{332}[100]):0.0266154{333}[89]):0.124438{334}[100]):0.0502525{335}[98],JF357662_Turbanella_bocqueti:0.0478647{336}):0.0275709{337}[85],JF357669_Turbanella_lutheri:0.0454418{338}):0.0147148{339}[33]):0.00398114{340}[80],(JN099890_Turbanella_cornuta:1e-06{341},JF970238_Turbanella_sp:0.0127439{342}):0.00776627{343}[0],Turbanella_cornuta_AF157007:0.00651766{344}):0{345};",
  "placements":
  [
    {"p":
      [
        [0.0102265893032, 337, 0.275516918107, -11119.7410236,
          -11122.0326136, 0.255359908843, 0.349238142052
        ],
        [0.112309899373, 327, 0.152240660715, -11120.3342101, -11123.2221227,
          0.252367946628, 0.106297833154
        ],
        [0.0501250527094, 335, 0.147373111638, -11120.3667051,
          -11122.5327605, 0.264558918274, 0.211792515521
        ],
        [0.0478589051314, 336, 0.147333638997, -11120.366973, -11123.58201,
          0.264611828609, 0.0741698405753
        ],
        [0.00812782442275, 339, 0.146451006158, -11120.3729817,
          -11122.7927811, 0.257898866846, 0.163299596299
        ],
        [0.124429965345, 334, 0.057977701278, -11121.2996142, -11125.0846517,
          0.262993349012, 0.0165058682687
        ],
        [7.77565532404e-06, 340, 0.0124275666787, -11122.8397555,
          -11124.8504446, 0.27376452063, 0.0208618681361
        ],
        [0.00888922553855, 2, 0.012420455599, -11122.8403279, -11125.2045575,
          0.273765554952, 0.0146407704005
        ],
        [0.00651129753967, 344, 0.012407413231, -11122.8413785,
          -11125.5045976, 0.273791641487, 0.0108457145749
        ],
        [0.00775868851535, 343, 0.0123989330185, -11122.8420622,
          -11125.6365107, 0.273793542141, 0.00950537057603
        ],
        [0.0454362137374, 338, 0.0112509287566, -11122.939222,
          -11126.7133918, 0.273730399554, 0.00323806482846
        ],
        [9.77341054105e-06, 1, 0.00528418111048, -11123.694955,
          -11125.7549288, 0.284159049719, 0.0084438536632
        ],
        [5.00000250015e-07, 0, 0.00528138106812, -11123.695485,
          -11125.7552173, 0.284175249119, 0.00844141858382
        ],
        [5.00000250015e-07, 341, 0.00163610364533, -11124.8673551,
          -11126.8880508, 0.276943366269, 0.00271914336655
        ]
      ], "nm": [["Gastro_1998cd35768c57be1899c2caa21f0eee", 1]]
    },
    {"p":
      [
        [0.00397335987058, 340, 0.183040500791, -11015.7743892,
          -11017.226545, 0.0920502898857, 0.32159941947
        ],
        [0.00651129753967, 344, 0.18286925354, -11015.7753252,
          -11017.8986279, 0.0920503458705, 0.164222764157
        ],
        [0.00775868851535, 343, 0.182718078585, -11015.7761522,
          -11018.0711817, 0.0920552696258, 0.138195591778
        ],
        [0.00888922553855, 2, 0.180517407739, -11015.7882694, -11017.7910421,
          0.0920723748764, 0.182876229132
        ],
        [0.0147076508469, 339, 0.180270510561, -11015.7896381,
          -11018.8914974, 0.0920721477577, 0.0608464983425
        ],
        [5.00000250015e-07, 0, 0.0263360252791, -11017.7131589,
          -11019.1651973, 0.0995826764754, 0.0462774336657
        ],
        [0.00124122313871, 1, 0.026336018512, -11017.7131591, -11019.1652149,
          0.0995826787583, 0.0462766161994
        ],
        [5.00000250015e-07, 341, 0.0189778042525, -11018.0408265,
          -11019.4823607, 0.0929880272717, 0.0336997697449
        ],
        [0.0127377076827, 342, 0.0189344007403, -11018.0431162,
          -11021.2071464, 0.0929938765802, 0.00600567750942
        ]
      ], "nm": [["Gastro_9217f8f39f9a1de525c07d58bbdc98d0", 1]]
    },
    {"p":
      [
        [0.00397335987058, 340, 0.194559912082, -10936.9302825,
          -10940.1478861, 6.11351501465e-06, 0.372500391212
        ],
        [0.00651129753967, 344, 0.194377922852, -10936.9312184,
          -10940.8296675, 6.11351501465e-06, 0.188379144809
        ],
        [0.00775868851535, 343, 0.194201251691, -10936.9321277,
          -10941.0268162, 6.11351501465e-06, 0.154672198484
        ],
        [0.00888922553855, 2, 0.190573991666, -10936.9509822, -10940.8412065,
          6.11351501465e-06, 0.186217944154
        ],
        [0.0147076508469, 339, 0.19017546344, -10936.9530755, -10942.1105851,
          6.11351501465e-06, 0.0523283912847
        ],
        [5.00000250015e-07, 341, 0.0174751540819, -10939.3402426,
          -10942.5390628, 6.11351501465e-06, 0.0340919540905
        ],
        [0.0127377076827, 342, 0.0174337035012, -10939.3426174,
          -10944.3303561, 6.11351501465e-06, 0.00568464191216
        ],
        [0.000721682645524, 1, 0.000601313038901, -10942.7096623,
          -10944.9488228, 0.00579823439313, 0.0030627136999
        ],
        [5.00000250015e-07, 0, 0.000601287646773, -10942.7097045,
          -10944.9488533, 0.00579883844582, 0.00306262035405
        ]
      ], "nm": [["Gastro_8bba994d1d56f9fbed9af4722a7b4d73", 1]]
    },
    {"p":
      [
        [0.00269104608759, 86, 0.248848231055, -10951.1037011,
          -10953.0423125, 0.0120626559178, 0.363977231953
        ],
        [0.00990880125894, 117, 0.243188140168, -10951.1267089,
          -10953.7370233, 0.0121156845225, 0.181704272609
        ],
        [5.10432922497e-06, 118, 0.243185366203, -10951.1267203,
          -10953.7321776, 0.012115831755, 0.182586905704
        ],
        [5.09007309583e-06, 91, 0.0668926368654, -10952.4174554,
          -10955.0090427, 0.0121150956856, 0.0509253633144
        ],
        [0.00813562636031, 132, 0.0614124176048, -10952.5029323,
          -10954.7641581, 0.0122536282292, 0.0650558231493
        ],
        [0.00684788799503, 104, 0.0350347054584, -10953.0642052,
          -10955.6329213, 0.0102324629219, 0.0272889681959
        ],
        [0.00727497572948, 124, 0.0256474403941, -10953.3761005,
          -10955.8113809, 0.00778245154261, 0.0228288010817
        ],
        [0.0286247078702, 133, 0.0124856680821, -10954.0959629,
          -10956.6656443, 0.0159316662709, 0.00971585879444
        ],
        [5.618385473e-06, 134, 0.0124855273534, -10954.0959742,
          -10956.0555497, 0.0159329850626, 0.0178830642322
        ],
        [0.0120273322708, 131, 0.00841046848951, -10954.4910671,
          -10956.2784266, 0.0180565508325, 0.0143102670358
        ],
        [5.23233526464e-06, 135, 0.00840331721567, -10954.4919178,
          -10956.7468278, 0.0180524285464, 0.00895825987766
        ],
        [0.0112130923747, 130, 0.00832113831828, -10954.5017453,
          -10956.284471, 0.0181082520418, 0.0142240299907
        ],
        [5.00000250015e-07, 129, 0.00815605224746, -10954.5217841,
          -10956.2989646, 0.0183424307539, 0.0140193594984
        ],
        [5.24327846124e-06, 119, 0.00399597301903, -10955.2352572,
          -10957.1855542, 0.0154433387918, 0.00577679836037
        ],
        [0.00419321590607, 128, 0.00397640533119, -10955.2401661,
          -10957.2771752, 0.0113046753998, 0.00527104468536
        ],
        [0.0112104925475, 84, 0.00281175787156, -10955.5867345,
          -10957.4762736, 0.0169414627499, 0.00431945902963
        ],
        [9.96379709889e-06, 93, 0.0017747295099, -10956.0468963,
          -10957.8856878, 0.017501232879, 0.00286828985945
        ],
        [0.00194117486661, 116, 0.00176353218028, -10956.0532256,
          -10957.8888378, 0.0175207567844, 0.00285926908183
        ],
        [6.23199150857e-06, 105, 0.00160327091164, -10956.1484985,
          -10957.9430107, 0.0180800726448, 0.0027084948858
        ],
        [0.00188471376999, 97, 0.00160322172115, -10956.1485291,
          -10957.9393461, 0.0180804678275, 0.00271843866146
        ]
      ], "nm": [["Gastro_648fc33b19348a5456578739d3f352d0", 1]]
    },
    {"p":
      [
        [0.00803963614104, 132, 0.579765815234, -10948.1642403,
          -10950.7092537, 0.00601553860785, 0.507997154182
        ],
        [0.0286247078702, 133, 0.0867162256779, -10950.0642235,
          -10952.8727755, 0.00890257310597, 0.0583788712435
        ],
        [5.618385473e-06, 134, 0.0867069884481, -10950.06433, -10952.2714598,
          0.00889493771264, 0.106513283311
        ],
        [0.0120273322708, 131, 0.0485642575979, -10950.6439767,
          -10952.5949592, 0.011734576546, 0.0770743321803
        ],
        [5.23233526464e-06, 135, 0.0485241230525, -10950.6448035,
          -10953.0475844, 0.0117340815476, 0.049015922054
        ],
        [0.0112131005601, 130, 0.0470900868833, -10950.674802,
          -10952.6114504, 0.0119108044375, 0.0758137104862
        ],
        [5.00000250015e-07, 129, 0.0460057248642, -10950.6980987,
          -10952.6281992, 0.0121642940955, 0.0745544921379
        ],
        [0.00410368601863, 128, 0.0315707565315, -10951.0746332,
          -10953.4806318, 0.00383922712949, 0.031788280801
        ],
        [5.5312493886e-06, 136, 0.0140742700549, -10951.8825162,
          -10954.7457714, 0.0114787974434, 0.00897064984164
        ],
        [0.0133084869236, 124, 0.00569373946089, -10952.7874973,
          -10955.3899112, 0.00699375130347, 0.00471061454738
        ],
        [0.00845874643139, 127, 0.00456337075768, -10953.008803,
          -10955.5995793, 0.00723555580268, 0.00381961739787
        ],
        [0.00388113563886, 86, 0.000724641437053, -10954.8489428,
          -10956.6299887, 0.0182477404115, 0.00136307181692
        ]
      ], "nm": [["Gastro_0bf984e5810a3efca3240c96ac8480af", 1]]
    },
    {"p":
      [
        [0.0215874001401, 330, 0.295165610326, -9428.54235459,
          -9439.83680787, 1.99999275208, 0.36330400322
        ],
        [0.00813035906333, 331, 0.295159226699, -9428.54237622,
          -9439.86489722, 1.99999275208, 0.353241022336
        ],
        [6.89116163494e-06, 332, 0.295136179791, -9428.54245431,
          -9440.46811508, 1.99999275208, 0.193239962789
        ],
        [7.59506594305e-06, 334, 0.0331799257575, -9430.72794613,
          -9442.72815445, 1.99999275208, 0.0201638898723
        ],
        [0.0266088866531, 333, 0.0331788022317, -9430.72798, -9442.43032225,
          1.99999275208, 0.0271594643514
        ],
        [0.0259713787585, 337, 0.00814264494005, -9432.13277612,
          -9443.75300174, 1.99999275208, 0.00723583732492
        ],
        [7.18497843036e-06, 339, 0.00812714470136, -9432.13468153,
          -9443.72652245, 1.99999275208, 0.00742999641478
        ],
        [5.00000250015e-07, 0, 0.00600051869231, -9432.43804527,
          -9443.96710046, 1.99999275208, 0.00584126492791
        ],
        [9.77341054105e-06, 1, 0.00600051857568, -9432.43804529,
          -9443.96710096, 1.99999275208, 0.00584126200741
        ],
        [0.00678362082297, 343, 0.00598938365846, -9432.43990267,
          -9443.97275654, 1.99999275208, 0.00580831949788
        ],
        [5.00000250015e-07, 341, 0.00520674080766, -9432.57993709,
          -9444.06586062, 1.99999275208, 0.00529195217077
        ],
        [6.1343378591e-06, 335, 0.00435691409307, -9432.75812715,
          -9444.33644848, 1.99999275208, 0.00403739364669
        ],
        [0.133786166162, 327, 0.00435638972591, -9432.75824751,
          -9445.3915612, 1.99999275208, 0.00140563144198
        ]
      ], "nm": [["Gastro_0b492b59811e7c932c7ffeee2243e304", 1]]
    },
    {"p":
      [
        [5.33399229966e-06, 92, 0.0883775423649, -9031.28306138,
          -9044.78050743, 1.99999275208, 0.0791916204029
        ],
        [6.49763025822e-06, 183, 0.0862469889186, -9031.30746413,
          -9045.1250306, 1.99999275208, 0.0561118665631
        ],
        [0.0119475614988, 143, 0.0528738268702, -9031.79677082,
          -9045.15209374, 1.99999275208, 0.0546136679028
        ],
        [9.96379709889e-06, 93, 0.0469847263884, -9031.91485669,
          -9045.2424451, 1.99999275208, 0.049895599943
        ],
        [9.265044536e-06, 95, 0.0468808073023, -9031.91707091,
          -9045.24389425, 1.99999275208, 0.0498233460631
        ],
        [9.25609073785e-06, 94, 0.046870599318, -9031.91728867,
          -9045.24402968, 1.99999275208, 0.0498165990368
        ],
        [5.00000250015e-07, 96, 0.0468604787685, -9031.91750462,
          -9045.24416538, 1.99999275208, 0.0498098392904
        ],
        [7.39103439212e-06, 97, 0.0468603908185, -9031.9175065,
          -9045.2444504, 1.99999275208, 0.0497956444154
        ],
        [8.54209391174e-06, 106, 0.0466749091857, -9031.92147253,
          -9045.24981366, 1.99999275208, 0.0495292923226
        ],
        [7.99686503718e-06, 109, 0.0466682441687, -9031.92161533,
          -9045.24926996, 1.99999275208, 0.0495562287965
        ],
        [7.30943945771e-06, 108, 0.0466622015335, -9031.92174482,
          -9045.24934959, 1.99999275208, 0.0495522826316
        ],
        [9.07764160442e-06, 110, 0.0465975394396, -9031.92313153,
          -9045.25041777, 1.99999275208, 0.0494993800978
        ],
        [5.22170345693e-06, 111, 0.0465820129468, -9031.92346479,
          -9045.25086217, 1.99999275208, 0.0494773877065
        ],
        [5.00000250015e-07, 113, 0.0465644908993, -9031.92384102,
          -9045.251095, 1.99999275208, 0.0494658693366
        ],
        [7.82020297517e-06, 114, 0.0465640715535, -9031.92385002,
          -9045.25357669, 1.99999275208, 0.0493432624014
        ],
        [7.61245045731e-06, 116, 0.0463522974394, -9031.92840841,
          -9045.25726296, 1.99999275208, 0.0491617046892
        ],
        [7.22629307358e-06, 83, 0.0417820434818, -9032.03221261,
          -9045.38123669, 1.99999275208, 0.0434295997882
        ],
        [0.0160690038337, 124, 0.0415612083766, -9032.03751203,
          -9045.38273536, 1.99999275208, 0.0433645618175
        ],
        [7.1600865093e-06, 122, 0.0410800670113, -9032.04915626,
          -9045.39481869, 1.99999275208, 0.042843726585
        ],
        [0.0351871864462, 123, 0.0409555532145, -9032.05219186,
          -9045.57670859, 1.99999275208, 0.0357185202097
        ]
      ], "nm": [["Gastro_689892c745ca3dbe05200c201f7cb7fa", 1]]
    },
    {"p":
      [
        [7.59996730256e-06, 132, 0.897199798045, -10947.9190691,
          -10950.740228, 0.00609882400571, 0.869304435127
        ],
        [0.00337909271973, 128, 0.038728776999, -10951.0617648,
          -10953.5128181, 0.00627651291714, 0.0543314498106
        ],
        [0.00845874643139, 127, 0.0176938269823, -10951.8451319,
          -10954.500821, 0.00706872705697, 0.0202286590619
        ],
        [0.0160690038337, 124, 0.01768480616, -10951.8456418, -10955.3104648,
          0.00706903691198, 0.00900208780184
        ],
        [0.0286247078702, 133, 0.00627193105708, -10952.8822634,
          -10955.7138065, 0.00894551697946, 0.00601414905566
        ],
        [5.618385473e-06, 134, 0.00627127085007, -10952.8823687,
          -10955.1030661, 0.00895536590813, 0.0110768270263
        ],
        [0.0120273322708, 131, 0.00327595430792, -10953.5317385,
          -10955.4579922, 0.0121396416983, 0.00776735127915
        ],
        [5.23233526464e-06, 135, 0.00327481554339, -10953.5320861,
          -10955.7454253, 0.0121319008888, 0.00582696387749
        ],
        [5.00000250015e-07, 129, 0.00323917520522, -10953.543029,
          -10955.4632873, 0.0122938634352, 0.0077263306378
        ],
        [5.4751269157e-06, 130, 0.00323915777272, -10953.5430343,
          -10955.4665434, 0.0122937919577, 0.00770121398993
        ],
        [0.0429113049285, 125, 0.00312048707779, -10953.5803586,
          -10957.487597, 0.00747989811735, 0.00102053233212
        ]
      ], "nm": [["Gastro_97215d8013201a1737aab6430a3c2553", 1]]
    },
    {"p":
      [
        [0.00525718820409, 343, 0.119264804994, -9046.29725346,
          -9049.5811694, 0.600570783035, 0.145284532281
        ],
        [0.00397335987058, 340, 0.115386090605, -9046.33031592,
          -9049.59347653, 0.602802002592, 0.143507453684
        ],
        [0.00651129753967, 344, 0.115283722393, -9046.33120349,
          -9050.21266359, 0.602808737277, 0.0772618202013
        ],
        [0.00888922553855, 2, 0.115047680739, -9046.33325308, -9049.64290243,
          0.602930421948, 0.136586904577
        ],
        [0.0147076508469, 339, 0.114903714485, -9046.33450522,
          -9050.86596436, 0.602938714164, 0.0402012927689
        ],
        [9.77341054105e-06, 1, 0.106161272589, -9046.41364036,
          -9049.69359415, 0.606640035422, 0.129835641749
        ],
        [5.00000250015e-07, 0, 0.106142437426, -9046.41381779,
          -9049.69369001, 0.606645218575, 0.129823197324
        ],
        [5.00000250015e-07, 341, 0.103267971017, -9046.44127247,
          -9049.68546765, 0.599605477138, 0.130895050183
        ],
        [0.0127377076827, 342, 0.103231592524, -9046.4416248, -9050.36491285,
          0.599607661972, 0.066350457904
        ],
        [0.0454362137374, 338, 0.00065551118929, -9051.50093964,
          -9056.58505847, 0.683148935537, 0.000131968111837
        ],
        [0.0275641205431, 337, 0.000655202039774, -9051.50141137,
          -9056.66621415, 0.683168426338, 0.000121681215855
        ]
      ], "nm": [["Gastro_ec989aef0f429817123c369c9e5eb7fd", 1]]
    },
    {"p":
      [
        [0.00397335987058, 340, 0.191571303127, -10966.7387253,
          -10968.4575893, 0.0235672694289, 0.359404466004
        ],
        [0.00651129753967, 344, 0.191392467182, -10966.7396592,
          -10969.1363589, 0.0235673132438, 0.182304585393
        ],
        [0.00775868851535, 343, 0.191222276782, -10966.7405488,
          -10969.3276607, 0.0235674291223, 0.150562306546
        ],
        [0.00888922553855, 2, 0.187803972829, -10966.7585866, -10969.1169771,
          0.0235723789461, 0.185872435185
        ],
        [0.0147076508469, 339, 0.187416237625, -10966.7606533,
          -10970.4005459, 0.0235725326039, 0.0514953659135
        ],
        [5.00000250015e-07, 341, 0.0178439899284, -10969.1123186,
          -10970.813964, 0.0237863275794, 0.0340582992119
        ],
        [0.0127377076827, 342, 0.0178024688146, -10969.1146482,
          -10972.5869485, 0.0237865817805, 0.00578396374684
        ],
        [0.00124122313871, 1, 0.00747364689411, -10969.9826023,
          -10971.6168605, 0.0297193574084, 0.0152591182915
        ],
        [5.00000250015e-07, 0, 0.00747363681779, -10969.9826036,
          -10971.6168381, 0.0297257613701, 0.0152594597086
        ]
      ], "nm": [["Gastro_a9c46dcc036a4f6e2a2a01d60f831b58", 1]]
    },
    {"p":
      [
        [0.00397335987058, 340, 0.193765323924, -10946.4788585,
          -10948.7308184, 0.00578097668402, 0.369134245076
        ],
        [0.00651129753967, 344, 0.193584195719, -10946.4797938,
          -10949.4117941, 0.00578097716437, 0.186827300707
        ],
        [0.00775868851535, 343, 0.193409564997, -10946.4806963,
          -10949.6068757, 0.00578096453471, 0.153715435566
        ],
        [0.00888922553855, 2, 0.189834601156, -10946.4993531, -10949.4156109,
          0.00578213359309, 0.186115583177
        ],
        [0.0147076508469, 339, 0.189438946643, -10946.5014395,
          -10950.6884229, 0.00578216805297, 0.0521203722148
        ],
        [5.00000250015e-07, 341, 0.0175933507436, -10948.8779853,
          -10951.1115073, 0.00582229268963, 0.0341400596254
        ],
        [0.0127377076827, 342, 0.0175503171378, -10948.8804343,
          -10952.8983563, 0.00582285624984, 0.00571801943475
        ],
        [0.00124122313871, 1, 0.00241185699702, -10950.8651093,
          -10952.8313186, 0.0116657072747, 0.00611448289089
        ],
        [5.00000250015e-07, 0, 0.00241184268348, -10950.8651152,
          -10952.8313156, 0.0116659927469, 0.00611450130903
        ]
      ], "nm": [["Gastro_43a2cca100c7bc922f2fbc57128cc9d7", 1]]
    },
    {"p":
      [
        [5.39977549387e-06, 6, 0.996650776978, -11434.0218238,
          -11438.7253076, 6.11351501465e-06, 0.999627413672
        ],
        [6.37552742746e-06, 10, 0.00334922302241, -11439.7174958,
          -11446.6199767, 6.11351501465e-06, 0.000372586327925
        ]
      ], "nm": [["Gastro_c0d442b9319568724b1aad44ffd607a9", 1]]
    },
    {"p":
      [
        [7.59996730256e-06, 132, 1, -10941.5478389, -10945.7974441,
          6.11351501465e-06, 1
        ]
      ], "nm": [["Gastro_dc7f23ebca1e7290fcd4907e167ab5c8", 1]]
    },
    {"p":
      [
        [0.00397335987058, 340, 0.180464465775, -9820.45248582,
          -9821.87131736, 0.114014683608, 0.308200285423
        ],
        [0.00651129753967, 344, 0.180297012073, -9820.45341415,
          -9822.53888612, 0.114014769356, 0.158092624421
        ],
        [0.00775868851535, 343, 0.180151035031, -9820.45422413,
          -9822.70642256, 0.11401555056, 0.133706172002
        ],
        [0.00888922553855, 2, 0.177884623333, -9820.46688455, -9822.40601463,
          0.114041177068, 0.180558094177
        ],
        [0.0147076508469, 339, 0.177717642125, -9820.4678237, -9823.34827561,
          0.11403394345, 0.0703717283349
        ],
        [9.77341054105e-06, 1, 0.0324101628334, -9822.16954767,
          -9823.59795268, 0.123032399273, 0.0548232585047
        ],
        [5.00000250015e-07, 0, 0.0323874462744, -9822.17024882,
          -9823.59828599, 0.123033280386, 0.0548049883845
        ],
        [5.00000250015e-07, 341, 0.0193655646839, -9822.68452324,
          -9824.09360098, 0.115390945185, 0.0333970052453
        ],
        [0.0127377076827, 342, 0.0193220478712, -9822.68677289,
          -9825.8026962, 0.115395072803, 0.00604584350691
        ]
      ], "nm": [["Gastro_9989f398985bbea9d1ae65929bf0b92e", 1]]
    },
    {"p":
      [
        [5.00000250015e-07, 0, 0.219421176105, -11145.6944415,
          -11147.2009192, 0.13094509713, 0.281043923007
        ],
        [0.00124122313871, 1, 0.219419133603, -11145.6944508, -11147.2015175,
          0.13094510235, 0.280875815641
        ],
        [8.68937002791e-06, 2, 0.219255849142, -11145.6951953,
          -11147.6938892, 0.130946407543, 0.171664329301
        ],
        [0.0114685005649, 339, 0.166682465578, -11145.969344, -11148.1125181,
          0.131716553177, 0.112946252617
        ],
        [7.77565532404e-06, 340, 0.0482556673455, -11147.2089213,
          -11148.7586898, 0.138189438378, 0.0591892763012
        ],
        [0.00775868851535, 343, 0.0458194545697, -11147.2607258,
          -11149.1777007, 0.13865589955, 0.0389286099746
        ],
        [0.00651129753967, 344, 0.0457988547634, -11147.2611755,
          -11149.4640805, 0.138665409535, 0.0292345045259
        ],
        [5.00000250015e-07, 341, 0.0152682550181, -11148.3596587,
          -11149.8629307, 0.133624835135, 0.01961901849
        ],
        [0.0127377076827, 342, 0.0152472746268, -11148.3610338,
          -11151.2376576, 0.133617852091, 0.00496181978348
        ],
        [0.0413802064234, 338, 0.00280237424356, -11150.0549676,
          -11152.7000882, 0.136812223453, 0.00114951708389
        ],
        [0.0275641205431, 337, 0.00202949500568, -11150.3776476,
          -11153.7889332, 0.140864422004, 0.000386933275171
        ]
      ], "nm": [["Gastro_58f4d1f3b07ce7e987ad8ffa7ae40d90", 1]]
    },
    {"p":
      [
        [0.00397335987058, 340, 0.193038825062, -10955.1042766,
          -10957.0805925, 0.0116569772981, 0.365910415554
        ],
        [0.00651129753967, 344, 0.192858432724, -10955.1052115,
          -10957.7608905, 0.0116569824967, 0.185321208637
        ],
        [0.00775868851535, 343, 0.192685116855, -10955.1061106,
          -10957.9549608, 0.0116570351874, 0.152630541775
        ],
        [0.00888922553855, 2, 0.189162154243, -10955.1245633, -10957.7570676,
          0.0116594128135, 0.186031018299
        ],
        [0.0147076508469, 339, 0.188769029029, -10955.1266438,
          -10959.0335967, 0.0116647149385, 0.0519034031609
        ],
        [5.00000250015e-07, 341, 0.017665979537, -10957.4955272,
          -10959.4537748, 0.0117597443632, 0.0340968910691
        ],
        [0.0127377076827, 342, 0.0176229615857, -10957.4979653,
          -10961.2361378, 0.0117654234926, 0.00573646532288
        ],
        [0.00124122313871, 1, 0.00409875721231, -10958.9564841,
          -10960.7654144, 0.0176370021198, 0.00918495393811
        ],
        [5.00000250015e-07, 0, 0.00409874375132, -10958.9564874,
          -10960.7653982, 0.0176328333799, 0.00918510224455
        ]
      ], "nm": [["Gastro_48b04e8517b791fa243e93ff48c1055d", 1]]
    }
  ], "metadata":
  {"invocation":
    "pplacer -o Gastrotricha18S_retry.jplace -p --keep-at-most 20 -c Gastrotricha18S.refpkg Gastrotricha18S_All.fasta"
  }, "version": 3, "fields":
  ["distal_length", "edge_num", "like_weight_ratio", "likelihood",
    "marginal_like", "pendant_length", "post_prob"
  ]
}
