# Supplementary material for: Biodiversity between sand grains: Meiofauna composition across southern and western Sweden assessed by metabarcoding
Source: Biodivers Data J. 2020 Apr 27;8:e51813. doi: 10.3897/BDJ.8.e51813 (PMC7198628; doi:10.3897/BDJ.8.e51813)
Supplement: Supplementary material 17 — Supplemental Data 17 [file bdj-08-e51813-s017.jplace]

{"tree":
  "((Karlut_KP730490:0.0297577{0},(((Myorub_KP730499:0.0045731{1},Myozon_KP730503:0.00373805{2}):0.00454642{3}[85],((Myobis_KP730486:1e-06{4},Myobis_KP730510:1e-06{5}):0.0163288{6}[100],((Myofis_KP730498:1e-06{7},(Myofis_KP730492:1e-06{8},Myofis_KP730497:1e-06{9}):1e-06{10}[0]):1e-06{11}[0],Myofis_KP730482:1e-06{12}):0.00508069{13}[95]):0.00300507{14}[18]):0.0149753{15}[99],((((Bradster_KP730515:1e-06{16},Bradster_KP730507:1e-06{17}):0.014463{18}[98],Bradster_FJ715298:0.0153832{19}):0.0456002{20}[100],((Myolut_KP730491:0.0288621{21},Myo_KP730501:0.0561997{22}):0.0178969{23}[99],((((Hapros_KP730509:1e-06{24},Hapros_AJ012511:1e-06{25}):0.0614837{26}[100],Happap_KP730502:0.0884149{27}):0.151411{28}[100],Hap_KC869787:0.0667192{29}):0.0156763{30}[47],((Psam2_KP730481:0.00509501{31},(Psam1_KP730508:0.010737{32},(Psam5_KP730513:0.0279235{33},(Psam3_KP730500:0.0127224{34},Psam4_KP730514:0.00821957{35}):0.00832711{36}[95]):0.00719271{37}[93]):0.00267317{38}[59]):0.0339443{39}[100],((Macclav_FJ715304:0.00618354{40},(((Macfin_FJ715302:0.00293436{41},((((Macgie_FJ715301:0.00322828{42},Macdong_KY652216:0.0013551{43}):0.000185464{44}[0],(Mactuba_KP730496:1e-06{45},(Mactuba_FJ715300:1e-06{46},(Macdong_KY652217:0.00138029{47},Macqui_FJ715299:1e-06{48}):1e-06{49}[0]):1e-06{50}[0]):8.99026e-06{51}[0]):0.000724417{52}[60],((Mactuba_D85091:0.0250552{53},Mactuba_U70080:0.00462208{54}):0.000780167{55}[74],(Macacus_KY579353:0.000780257{56},((Macacus_KY579352:1e-06{57},Macacus_KY579351:0.00393795{58}):0.000785595{59}[82],((Macobt_KY579348:0.000798923{60},Macob_KY579349:1e-06{61}):0.00160004{62}[92],Macobt_KY579350:0.000798692{63}):1e-06{64}[0]):0.00157136{65}[89]):0.000792712{66}[77]):1e-06{67}[0]):0.00293852{68}[90],(Machey_KX755246:0.00117524{69},(Macchong_KX769148:1e-06{70},((Macsin_KY579356:0.00332288{71},((Maczhao_KX769147:0.00245633{72},(Macsin_KY579354:0.00237713{73},Macsin_KY579355:1e-06{74}):1e-06{75}[0]):1e-06{76}[0],Maczhao_KX769146:0.00329306{77}):0.00064224{78}[0]):0.00175147{79}[87],Macchon_KX769149:0.00163623{80}):0.000872236{81}[77]):0.00706602{82}[98]):0.00802584{83}[98]):0.00157441{84}[75]):0.00105073{85}[23],((Maclong_FJ715309:1e-06{86},Macspi_FJ715308:0.000799415{87}):0.00160056{88}[93],Macbalt_FJ715310:1e-06{89}):0.00189392{90}[88]):0.00197314{91}[81],(Mackep_FJ715307:0.010521{92},(Maclig_FJ715306:0.00301425{93},(Machys_FJ715303:0.0064873{94},(((Maczhu_KX771197:1e-06{95},Maczhu_KX771198:1e-06{96}):1e-06{97}[0],Maczhu_KX771196:0.0312497{98}):0.000887791{99}[78],Macmys_FJ715305:0.00322942{100}):1e-06{101}[0]):0.00379923{102}[92]):0.00180625{103}[58]):0.00546277{104}[92]):0.00153647{105}[43]):0.00519135{106}[58],(Macrub_KC869789:0.0165197{107},((Machys_FJ715311:0.00387865{108},Machys_AF051329:0.00938742{109}):0.00471782{110}[93],(Macpus_FJ715313:0.00568779{111},Macpus_FJ715314:0.00487307{112}):0.00503566{113}[98]):0.00191895{114}[79]):0.00994121{115}[94]):0.0317472{116}[100]):0.0611211{117}[100]):0.00698682{118}[84]):0.00574585{119}[38]):0.0812045{120}[100],((((((((Ala_S81:1e-06{121},(Ala_S79:1e-06{122},Ala_S78:1e-06{123}):1e-06{124}[0]):1e-06{125}[0],Ala_S82:1e-06{126}):0.00686611{127}[99],(Miclau_J10_96h:1e-06{128},(Miclau_J10_64i:1e-06{129},Miclau_J182_65i:1e-06{130}):1e-06{131}[0]):0.000996169{132}[75]):0.00084743{133}[10],(Mickarl_S114:1e-06{134},Micsep_S112_1a:1e-06{135}):0.00330306{136}[95]):0.0045017{137}[97],(MicB_KP730505:0.00518437{138},(((Micsp5_S53_93a:1e-06{139},Micsp5_S3_60c:1e-06{140}):0.000856478{141}[84],((Micsp6_J16_90h:1e-06{142},Micsp6_J11_4i:1e-06{143}):1e-06{144}[0],(Micsp6_S4_61c:1e-06{145},(Micsp6_S66_77c:1e-06{146},(Micsp5_J13_2i:1e-06{147},Micsp5_J12_1i:1e-06{148}):1e-06{149}[0]):1e-06{150}[0]):1e-06{151}[0]):1e-06{152}[0]):0.00344854{153}[97],(Micpap_FJ715296:0.00693796{154},(MicspA_KP730494:1e-06{155},(Micsp3_J9_98h:0.0050649{156},(Micrub_S41:0.000853786{157},(((Micrub_S39:1e-06{158},Micrub_S51_20a:1e-06{159}):1e-06{160}[0],(((Micrub_S35_37d:1e-06{161},((((Micrub_S52:1e-06{162},Micrub_S48:1e-06{163}):1e-06{164}[0],(Micrub_S37_38d:1e-06{165},Micrub_S43:1e-06{166}):1e-06{167}[0]):1e-06{168}[0],Micrub_S34_36d:1e-06{169}):1e-06{170}[0],Micrub_S50_21a:1e-06{171}):1e-06{172}[0]):1e-06{173}[0],Micrub_S36_6a:1e-06{174}):1e-06{175}[0],((Micrub_S49:1e-06{176},Micrub_S33:1e-06{177}):1e-06{178}[0],Micrub_S47:1e-06{179}):1e-06{180}[0]):1e-06{181}[0]):1e-06{182}[0],Micrub_S56_27a:1e-06{183}):1e-06{184}[0]):0.0078711{185}[99]):0.00185877{186}[84]):0.000829724{187}[78]):0.000859529{188}[75]):0.000838611{189}[75]):0.000851007{190}[74]):0.0020698{191}[87],((((((((((Micbis_F5:1e-06{192},(((((((Micbis_F20:1e-06{193},Micbis_A121_25d:1e-06{194}):1e-06{195}[0],(Micbis_A13_61h:1e-06{196},Micbis_E57_59i:1e-06{197}):1e-06{198}[0]):1e-06{199}[0],((Micbis_A14_62h:1e-06{200},((Micbis_F19_99i:1e-06{201},(Micbis_A6_54i:1e-06{202},(Micbis_A1:0.00959923{203},Micbis_F13:0.00780604{204}):1e-06{205}[0]):1e-06{206}[0]):1e-06{207}[0],Micbis_K25_66i:1e-06{208}):1e-06{209}[0]):1e-06{210}[0],(Micbis_A52_6d:1e-06{211},Micbis_E60_75h:1e-06{212}):1e-06{213}[0]):1e-06{214}[0]):1e-06{215}[0],((((MicbisB_F23:0.00171433{216},(MicbisB_F3:0.00258363{217},MicbisB_F12:0.00257389{218}):1e-06{219}[0]):0.000856152{220}[84],Micbis_G26_29d:0.000856321{221}):1e-06{222}[0],(Micbis_J2:1e-06{223},Micbis_A53_56i:1e-06{224}):1e-06{225}[0]):1e-06{226}[0],(Micbis_F14_95i:1e-06{227},Micbis_A9_59h:1e-06{228}):1e-06{229}[0]):1e-06{230}[0]):1e-06{231}[0],Micbis_C75_42b:1e-06{232}):1e-06{233}[0],Micbis_F6:1e-06{234}):1e-06{235}[0],(Micbis_F25:1e-06{236},Micbis_F22:1e-06{237}):1e-06{238}[0]):1e-06{239}[0]):1e-06{240}[0],(Micbis_E56_82c:1e-06{241},Micbis_E78_82h:1e-06{242}):1e-06{243}[0]):1e-06{244}[0],(Micbis_C4_79c:1e-06{245},Micbis_F17_97i:1e-06{246}):1e-06{247}[0]):1e-06{248}[0],Micbis_F29:1e-06{249}):1e-06{250}[0],Micbis_F4:1e-06{251}):1e-06{252}[0],((Micbis_C18_80c:1e-06{253},Micbis_G22:1e-06{254}):1e-06{255}[0],(Micbis_F21:1e-06{256},(Micbis_J4:1e-06{257},(Micbis_A16_64h:1e-06{258},Micbis_A15_63h:1e-06{259}):1e-06{260}[0]):1e-06{261}[0]):1e-06{262}[0]):1e-06{263}[0]):1e-06{264}[0],Micbis_F18_98i:1e-06{265}):1e-06{266}[0],(((Micbis_A50_5d:1e-06{267},(Micbis_F24:1e-06{268},Micbis_G17_28d:1e-06{269}):1e-06{270}[0]):1e-06{271}[0],((Micbis_J3_88h:1e-06{272},Micbis_F16_96i:1e-06{273}):1e-06{274}[0],Micbis_A49_86c:1e-06{275}):1e-06{276}[0]):1e-06{277}[0],Micbis_E52_74h:1e-06{278}):1e-06{279}[0]):1e-06{280}[0],Micbis_A54:0.000855852{281}):0.00261675{282}[90],(Miclon_KC869791:0.00257657{283},(Miczic_L1_50i:1e-06{284},(Miczic_L3_52i:1e-06{285},(((Miclin_A32_96c:1e-06{286},((Miclin_A3_89c:1e-06{287},(Miclin_A51_7d:1e-06{288},((Miclin_F10_91i:0.000856103{289},((((Miclin_KP730484:1e-06{290},(Miclin_B3_30j:1e-06{291},(Miclin_F34_16j:1e-06{292},(((Miclin_E62_75c:1e-06{293},(Miclin_A60_12d:1e-06{294},((Miclin_F9_90i:1e-06{295},((Miclin_A36_85c:1e-06{296},(Miclin_A41_3d:1e-06{297},((Miclin_A19_92c:1e-06{298},(Miclin_A56_8d:1e-06{299},(((Miclin_A36_98c:1e-06{300},(Miclin_A116_23d:1e-06{301},((Miclin_F2_83i:1e-06{302},(Miclin_F11_92i:1e-06{303},(((Miclin_A64_17d:1e-06{304},(((((Miclin_B4_31j:1e-06{305},((((((((Micart_B1_28j:1e-06{306},((Miclin_F27_9j:1e-06{307},(((Miclin_F32_14j:1e-06{308},((Miclin_D85092:0.0142456{309},Miclin_A27_93c:0.00085616{310}):1e-06{311}[0],Miclin_F28_10j:1e-06{312}):1e-06{313}[0]):1e-06{314}[0],Miclin_A120_24d:1e-06{315}):1e-06{316}[0],Miclin_A108_22d:1e-06{317}):1e-06{318}[0]):1e-06{319}[0],Miclin_A34_97c:1e-06{320}):1e-06{321}[0]):1e-06{322}[0],Miclin_A58_10d:1e-06{323}):1e-06{324}[0],Miclin_F26_7j:1e-06{325}):1e-06{326}[0],Miclin_A31_95c:1e-06{327}):1e-06{328}[0],Micart_B2_29j:1e-06{329}):1e-06{330}[0],Miclin_A39_2d:1e-06{331}):1e-06{332}[0],Miclin_A42_4d:1e-06{333}):1e-06{334}[0],Miclin_F8_89i:1e-06{335}):1e-06{336}[0]):1e-06{337}[0],Miclin_A37_99c:1e-06{338}):1e-06{339}[0],Miclin_A59_11d:1e-06{340}):1e-06{341}[0],Miclin_J1_86h:1e-06{342}):1e-06{343}[0],Miclin_A122_26d:1e-06{344}):1e-06{345}[0]):1e-06{346}[0],Miclin_A2_84c:1e-06{347}):1e-06{348}[0],Miclin_A69_18d:1e-06{349}):1e-06{350}[0]):1e-06{351}[0]):1e-06{352}[0],Miclin_A38_1d:1e-06{353}):1e-06{354}[0]):1e-06{355}[0]):1e-06{356}[0],Miclin_A4_90c:1e-06{357}):1e-06{358}[0],Miclin_G19_32d:1e-06{359}):1e-06{360}[0]):1e-06{361}[0]):1e-06{362}[0],Miclin_A134_49e:1e-06{363}):1e-06{364}[0]):1e-06{365}[0]):1e-06{366}[0],((Miclin_A63_16d:1e-06{367},(Miclin_A70_19d:1e-06{368},Miclin_A61_13d:1e-06{369}):1e-06{370}[0]):1e-06{371}[0],Miclin_A62_15d:1e-06{372}):0.000856495{373}[93]):1e-06{374}[0]):1e-06{375}[0],((Mictch_F7_88i:1e-06{376},Mictch_E83_83h:1e-06{377}):0.000856148{378}[84],Miclin_A73_20d:0.00172166{379}):1e-06{380}[0]):1e-06{381}[0]):1e-06{382}[0]):1e-06{383}[0],Miclin_F35_17j:1e-06{384}):1e-06{385}[0],Miclin_F31_13j:1e-06{386}):1e-06{387}[0]):1e-06{388}[0]):1e-06{389}[0]):1e-06{390}[0],Miclin_A107_21d:0.000856364{391}):1e-06{392}[0],Miclin_F30_12j:1e-06{393}):1e-06{394}[0],Miclin_A5_91c:1e-06{395}):1e-06{396}[0]):1e-06{397}[0],Miclin_A30_94c:1e-06{398}):1e-06{399}[0]):1e-06{400}[0]):1e-06{401}[0],Miclin_A57_9d:1e-06{402}):1e-06{403}[0]):1e-06{404}[0],Miclin_B21_44j:1e-06{405}):0.000858726{406}[92],Miczic_L2_51i:1e-06{407}):1e-06{408}[0]):1e-06{409}[0]):1e-06{410}[0]):0.00168883{411}[85]):0.0103134{412}[100]):0.00119594{413}[76],((((MicGN_S58:1e-06{414},(MicGN_S25:1e-06{415},((MicGN_S38_31a:1e-06{416},MicGN_S56:1e-06{417}):1e-06{418}[0],(MicGN_S28:1e-06{419},MicGN_S38_39d:1e-06{420}):1e-06{421}[0]):1e-06{422}[0]):1e-06{423}[0]):1e-06{424}[0],MicGN_S27:1e-06{425}):1e-06{426}[0],MicGN_S57:1e-06{427}):0.00516597{428}[97],(MicD_KP730487:0.00622448{429},((MicC_KP730493:1e-06{430},MicC_KP730483:1e-06{431}):0.00305169{432}[91],(((((Micedm_S30_76c:1e-06{433},Micedm_S31_78i:1e-06{434}):1e-06{435}[0],(Micedm_S17_62c:1e-06{436},Micedm_S32_47:1e-06{437}):1e-06{438}[0]):1e-06{439}[0],Micedm_S20_74i:1e-06{440}):1e-06{441}[0],Micedm_S21:1e-06{442}):1e-06{443}[0],Micedm_S12_92h:1e-06{444}):0.0092185{445}[100]):0.00113275{446}[39]):0.00253166{447}[13]):0.00461401{448}[88]):0.0370249{449}[100],((Doliuni_FJ715295:0.0125941{450},Ausaru_KP730495:0.040636{451}):0.000619221{452}[0],((Cylrie_KP730485:0.0393419{453},Cylnot_KP730488:0.0134114{454}):0.0167018{455}[99],((Parofus_AJ012531:1e-06{456},Paromas_KP730506:0.00813917{457}):0.000747898{458}[82],((Parodub_KP730489:0.0320139{459},(Psammin_KP730512:1e-06{460},Paromin_KP730511:0.00079954{461}):0.0145001{462}[100]):0.0073519{463}[96],Parofus_KP730504:0.000812554{464}):1e-06{465}[0]):0.0176534{466}[100]):0.00620739{467}[92]):0.0216123{468}[100]):0.00130545{469}[19]):0.00205039{470}[75]):0.00844802{471}[86]):0.0387033{472}[100],Acanth_KC869788:1e-06{473},Acan_KC869788:1e-06{474}):0{475};",
  "placements":
  [
    {"p":
      [
        [0.0611136525841, 117, 0.115332624615, -2740.15767249, -2854.3515011,
          1.99999275208, 0.0257386637313
        ],
        [6.33525225365e-06, 94, 0.0825947446369, -2740.49154677,
          -2853.35100456, 1.99999275208, 0.0699996909259
        ],
        [5.24269775263e-06, 32, 0.0777825732487, -2740.55157542,
          -2851.8829079, 1.99999275208, 0.303866204309
        ],
        [9.16740411245e-06, 109, 0.0545038787251, -2740.90722096,
          -2855.1746064, 1.99999275208, 0.0113009748106
        ],
        [9.21448357798e-06, 110, 0.0543385718447, -2740.91025851,
          -2855.76085011, 1.99999275208, 0.00628801395806
        ],
        [0.00387107678259, 108, 0.054289912434, -2740.91115439,
          -2855.8239051, 1.99999275208, 0.00590376506089
        ],
        [0.00993149743152, 115, 0.0462397551391, -2741.0716529,
          -2855.79375686, 1.99999275208, 0.0060844633335
        ],
        [7.75078109143e-06, 116, 0.0462396736112, -2741.07165466,
          -2854.7606082, 1.99999275208, 0.0170967295196
        ],
        [0.00518627743491, 106, 0.04623104752, -2741.07184123,
          -2855.79508074, 1.99999275208, 0.00607641359663
        ],
        [0.0339359975047, 39, 0.0456415834169, -2741.08467361,
          -2854.82367246, 1.99999275208, 0.0160518310325
        ],
        [8.02692649789e-06, 35, 0.0392195907481, -2741.23631644,
          -2851.47417805, 1.99999275208, 0.457289808447
        ],
        [7.62932102278e-06, 98, 0.0376603818616, -2741.27688417,
          -2855.33985246, 1.99999275208, 0.00957966791914
        ],
        [6.30746140958e-06, 100, 0.0375374951635, -2741.28015252,
          -2855.39377703, 1.99999275208, 0.00907676959979
        ],
        [5.00000250015e-07, 95, 0.0375274182523, -2741.28042101,
          -2855.39582103, 1.99999275208, 0.00905823564751
        ],
        [5.00000250015e-07, 96, 0.0375274182523, -2741.28042101,
          -2855.39582103, 1.99999275208, 0.00905823564751
        ],
        [5.00000250015e-07, 97, 0.0375274139289, -2741.28042112,
          -2855.39582359, 1.99999275208, 0.00905821246716
        ],
        [6.9358656792e-06, 99, 0.0375273816255, -2741.28042199,
          -2855.39694886, 1.99999275208, 0.00904802520582
        ],
        [5.00000250015e-07, 101, 0.0375235744621, -2741.28052344,
          -2855.39810585, 1.99999275208, 0.00903756283567
        ],
        [7.42037600347e-06, 102, 0.0375230924841, -2741.28053629,
          -2855.82833331, 1.99999275208, 0.00587767973779
        ],
        [0.00293278521575, 68, 0.0372318680304, -2741.28832777,
          -2856.09340841, 1.99999275208, 0.00450905221422
        ]
      ], "nm": [["Macro_61d37c771fe9a0c54200bb4ad4379e29", 1]]
    },
    {"p":
      [
        [6.14944532882e-06, 450, 1, -2527.18476763, -2529.48819792,
          6.11351501465e-06, 1
        ]
      ], "nm": [["Macro_fc3931e99fb95a1bb7c93d4aaa757f5a", 1]]
    },
    {"p":
      [
        [0.00568223510929, 111, 0.297138892713, -2733.05622979,
          -2734.90316334, 0.0131424127948, 0.362682042855
        ],
        [0.00486355046887, 112, 0.297091715326, -2733.05638857,
          -2734.88615068, 0.0131424179509, 0.368905012243
        ],
        [9.83528183392e-06, 113, 0.296775022156, -2733.05745512,
          -2735.37431108, 0.0131425998322, 0.22641708072
        ],
        [9.70820863296e-06, 115, 0.0292230079133, -2735.37547313,
          -2738.4032464, 0.0163212634051, 0.0109511389919
        ],
        [0.0165115895596, 107, 0.0292228225579, -2735.37547947,
          -2738.97706861, 0.0163212790071, 0.00616952137758
        ],
        [0.001911456821, 114, 0.0292192737718, -2735.37560091,
          -2737.78632472, 0.0163201118589, 0.0202948093585
        ],
        [0.00470860110835, 110, 0.0190024584122, -2735.80586111,
          -2739.42196302, 0.0160735537745, 0.00395399654849
        ],
        [0.00518627743491, 106, 0.00232680715002, -2737.90593246,
          -2741.26445935, 0.0170804538375, 0.000626397905616
        ]
      ], "nm": [["Macro_bc1208fb92d52bf13e80d26c6f43c82f", 1]]
    },
    {"p":
      [
        [5.00000250015e-07, 376, 0.150207816156, -2637.96622758,
          -2645.12116589, 0.0554418978023, 0.305889722133
        ],
        [5.00000250015e-07, 377, 0.150207816156, -2637.96622758,
          -2645.12116589, 0.0554418978023, 0.305889722133
        ],
        [6.68865481986e-06, 378, 0.149006083927, -2637.97426022,
          -2645.89174484, 0.0554558627699, 0.141548965231
        ],
        [5.00000250015e-07, 139, 0.0836673565354, -2638.55139846,
          -2647.61729037, 0.0616452185994, 0.0252064564138
        ],
        [5.00000250015e-07, 140, 0.0836673565354, -2638.55139846,
          -2647.61729037, 0.0616452185994, 0.0252064564138
        ],
        [6.69123551436e-06, 141, 0.0829989251562, -2638.5594197,
          -2648.39015641, 0.0616597746639, 0.0116375173367
        ],
        [6.68875354221e-06, 310, 0.0225642121566, -2639.86188224,
          -2648.2755937, 0.0613100728309, 0.0130501136205
        ],
        [5.00000250015e-07, 368, 0.022469654867, -2639.86608163,
          -2648.12348557, 0.0613276038287, 0.0151940662461
        ],
        [5.00000250015e-07, 369, 0.022469654867, -2639.86608163,
          -2648.12348557, 0.0613276038287, 0.0151940662461
        ],
        [5.00000250015e-07, 367, 0.0224659519005, -2639.86624644,
          -2648.12388081, 0.0613349728597, 0.0151880620443
        ],
        [5.00000250015e-07, 370, 0.0224659519005, -2639.86624644,
          -2648.12388081, 0.0613349728597, 0.0151880620443
        ],
        [5.00000250015e-07, 371, 0.022462246965, -2639.86641137,
          -2648.12427606, 0.0613294905247, 0.0151820601544
        ],
        [5.00000250015e-07, 372, 0.022462246965, -2639.86641137,
          -2648.12427606, 0.0613294905247, 0.0151820601544
        ],
        [6.69136424334e-06, 373, 0.0224356092524, -2639.86759796,
          -2648.28941081, 0.0613426996489, 0.0128710388416
        ],
        [6.69034462534e-06, 391, 0.0223981715926, -2639.86926802,
          -2648.29340675, 0.0613522238196, 0.0128197095041
        ],
        [5.00000250015e-07, 311, 0.019612777089, -2640.00206611,
          -2648.45069731, 0.0621120121941, 0.010953874549
        ],
        [5.00000250015e-07, 312, 0.019612776928, -2640.00206612,
          -2648.45069726, 0.0621054092399, 0.0109538751135
        ],
        [5.00000250015e-07, 308, 0.0196095424534, -2640.00223105,
          -2648.45109572, 0.0621129678957, 0.0109495113096
        ],
        [5.00000250015e-07, 313, 0.01960954127, -2640.00223111,
          -2648.45109572, 0.0621063551148, 0.0109495113096
        ],
        [5.00000250015e-07, 315, 0.0196063073263, -2640.00239604,
          -2648.45149418, 0.0621139236113, 0.0109451492025
        ]
      ], "nm": [["Macro_09d669b7fd0b844b08970153eafdc97c", 1]]
    },
    {"p":
      [
        [5.00000250015e-07, 134, 0.1497110898, -2555.07062542,
          -2555.60792746, 6.11351501465e-06, 0.192968857275
        ],
        [5.00000250015e-07, 135, 0.1497110898, -2555.07062542,
          -2555.60792746, 6.11351501465e-06, 0.192968857275
        ],
        [6.45128861122e-06, 136, 0.149686078841, -2555.07079249,
          -2555.64281288, 6.11351501465e-06, 0.186353123325
        ],
        [6.62054414126e-06, 133, 0.137587299642, -2555.15507416,
          -2555.67973138, 6.11351501465e-06, 0.179598695612
        ],
        [0.00685940121241, 127, 0.137489462288, -2555.15578551,
          -2556.3303841, 6.11351501465e-06, 0.0936975623803
        ],
        [0.000988385952395, 132, 0.13655618221, -2555.16259667,
          -2556.3562279, 6.11351501465e-06, 0.0913070831331
        ],
        [8.79237650965e-06, 137, 0.135445468714, -2555.17076367,
          -2556.81735732, 6.11351501465e-06, 0.0575756047742
        ],
        [5.00000250015e-07, 129, 0.000803362868783, -2560.29828156,
          -2560.7190112, 0.00483447018324, 0.00116351438797
        ],
        [5.00000250015e-07, 130, 0.000803362868783, -2560.29828156,
          -2560.7190112, 0.00483447018324, 0.00116351438797
        ],
        [5.00000250015e-07, 131, 0.000803352094465, -2560.29829497,
          -2560.71902717, 0.00483452012657, 0.00116349580382
        ],
        [5.00000250015e-07, 128, 0.000803352094464, -2560.29829497,
          -2560.71902717, 0.00483452012816, 0.00116349580382
        ],
        [5.00000250015e-07, 122, 9.99834631628e-05, -2562.38208326,
          -2562.79437666, 0.00469221870969, 0.000146033330236
        ],
        [5.00000250015e-07, 123, 9.99834631628e-05, -2562.38208326,
          -2562.79437666, 0.00469221870969, 0.000146033330236
        ],
        [5.00000250015e-07, 121, 9.998312896e-05, -2562.3820866,
          -2562.7943814, 0.00469224881049, 0.000146032638311
        ],
        [5.00000250015e-07, 124, 9.99831289598e-05, -2562.3820866,
          -2562.7943814, 0.00469224881198, 0.000146032638311
        ],
        [5.00000250015e-07, 125, 9.99827964862e-05, -2562.38208993,
          -2562.7943861, 0.00469227883183, 0.000146031952614
        ],
        [5.00000250015e-07, 126, 9.99827964862e-05, -2562.38208993,
          -2562.7943861, 0.00469227883183, 0.000146031952614
        ]
      ], "nm": [["Macro_5927de85bf87169f09d3681a9195b623", 1]]
    },
    {"p":
      [
        [5.00000250015e-07, 139, 0.285637793465, -2564.58486728,
          -2565.05035875, 0.00560597288076, 0.362144321707
        ],
        [5.00000250015e-07, 140, 0.285637793465, -2564.58486728,
          -2565.05035875, 0.00560597288076, 0.362144321707
        ],
        [6.69123551436e-06, 141, 0.283354376579, -2564.59289351,
          -2565.7473292, 0.0056074365722, 0.180381195453
        ],
        [5.00000250015e-07, 376, 0.0206039979229, -2567.2141067,
          -2568.12391256, 0.00877023978027, 0.0167515200411
        ],
        [5.00000250015e-07, 377, 0.0206039979229, -2567.2141067,
          -2568.12391256, 0.00877023978027, 0.0167515200411
        ],
        [6.68865481986e-06, 378, 0.0204481343625, -2567.22170018,
          -2568.79999907, 0.0087711838228, 0.00851988202596
        ],
        [0.000832059380366, 189, 0.00799306766003, -2568.16101721,
          -2569.48729353, 0.0103900241862, 0.00428494633052
        ],
        [6.64849315615e-06, 190, 0.00798167057787, -2568.1624441,
          -2569.77153166, 0.0103821050213, 0.00322479666918
        ],
        [6.73542294711e-06, 153, 0.00564582188867, -2568.50867605,
          -2569.68224762, 0.0104823710074, 0.00352596423021
        ],
        [5.00000250015e-07, 152, 0.00564566956242, -2568.50870303,
          -2569.5957832, 0.0104764735817, 0.00384440312278
        ],
        [5.00000250015e-07, 147, 0.00564500531425, -2568.50882069,
          -2569.59615197, 0.0104769663799, 0.00384298570468
        ],
        [5.00000250015e-07, 148, 0.00564500531425, -2568.50882069,
          -2569.59615197, 0.0104769663799, 0.00384298570468
        ],
        [5.00000250015e-07, 146, 0.0056448573073, -2568.50884691,
          -2569.59619634, 0.0104771063667, 0.00384281518504
        ],
        [5.00000250015e-07, 149, 0.0056448573073, -2568.50884691,
          -2569.59619634, 0.0104771063667, 0.00384281518504
        ],
        [5.00000250015e-07, 145, 0.00564470720475, -2568.50887351,
          -2569.59624072, 0.0104832153873, 0.00384264466418
        ],
        [5.00000250015e-07, 150, 0.00564470720475, -2568.50887351,
          -2569.59624072, 0.0104832153873, 0.00384264466418
        ],
        [5.00000250015e-07, 142, 0.00564470720464, -2568.50887351,
          -2569.59624072, 0.0104832155373, 0.00384264466418
        ],
        [5.00000250015e-07, 143, 0.00564470720464, -2568.50887351,
          -2569.59624072, 0.0104832155373, 0.00384264466418
        ],
        [5.00000250015e-07, 151, 0.00564456126654, -2568.50889936,
          -2569.5962851, 0.0104773868465, 0.00384247411772
        ],
        [5.00000250015e-07, 144, 0.00564456126653, -2568.50889936,
          -2569.5962851, 0.0104773868821, 0.00384247411772
        ]
      ], "nm": [["Macro_1d602080beb42b79f37fb326852c50c7", 1]]
    },
    {"p":
      [
        [9.92090605153e-06, 451, 0.136305531171, -2850.33011971,
          -2957.64294362, 1.99999275208, 0.0942533228295
        ],
        [5.00000250015e-07, 474, 0.073689868247, -2850.94515331,
          -2957.4800234, 1.99999275208, 0.110930768087
        ],
        [5.00000250015e-07, 473, 0.0736896471556, -2850.94515631,
          -2957.4799431, 1.99999275208, 0.110939676096
        ],
        [0.0386938204586, 472, 0.0736824620781, -2850.94525382,
          -2955.77988776, 1.99999275208, 0.607311559236
        ],
        [0.00149568286909, 309, 0.0651407902782, -2851.06846769,
          -2969.72704781, 1.99999275208, 5.32398593191e-07
        ],
        [0.0013003512071, 469, 0.040819146069, -2851.53586739, -2960.0264941,
          1.99999275208, 0.00869228285388
        ],
        [8.00935216314e-06, 470, 0.0408180695072, -2851.53589376,
          -2960.13220201, 1.99999275208, 0.00782033732908
        ],
        [0.0216069840786, 468, 0.0407927049267, -2851.53651536,
          -2959.81678007, 1.99999275208, 0.0107204124964
        ],
        [0.0370158656878, 449, 0.0407877214966, -2851.53663753,
          -2962.03842164, 1.99999275208, 0.00116242467492
        ],
        [8.2500195528e-06, 471, 0.0405167299997, -2851.54330365,
          -2960.25099731, 1.99999275208, 0.0069443778468
        ],
        [0.0149680241524, 15, 0.0405125394222, -2851.54340708, -2961.3832351,
          1.99999275208, 0.00223825063902
        ],
        [0.0297504536978, 0, 0.0391725518964, -2851.57704233, -2961.67268634,
          1.99999275208, 0.0016757207243
        ],
        [5.00000250015e-07, 460, 0.0384186803917, -2851.59647482,
          -2965.19263027, 1.99999275208, 4.96031681816e-05
        ],
        [7.08012622769e-06, 462, 0.0384135959463, -2851.59660717,
          -2965.7888825, 1.99999275208, 2.73250120337e-05
        ],
        [0.000793293798252, 461, 0.0384122348184, -2851.5966426,
          -2965.68366238, 1.99999275208, 3.0356862367e-05
        ],
        [0.00620132943165, 467, 0.0370247500499, -2851.63343202,
          -2960.24699484, 1.99999275208, 0.00697222818215
        ],
        [0.000609545443559, 452, 0.0370233179571, -2851.6334707,
          -2959.90895696, 1.99999275208, 0.00977641384567
        ],
        [0.0125879145881, 450, 0.036858233691, -2851.63793959,
          -2959.26483023, 1.99999275208, 0.0186174528367
        ],
        [0.0176448121509, 466, 0.0358194716569, -2851.66652698,
          -2961.6566725, 1.99999275208, 0.0017027714758
        ],
        [5.00000250015e-07, 456, 0.032101953241, -2851.77610175,
          -2964.19747742, 1.99999275208, 0.000134183405443
        ]
      ], "nm": [["Macro_4518e14ab46c529f3c162ba1f7fa1b68", 1]]
    },
    {"p":
      [
        [0.000823241521795, 187, 0.154317177008, -2439.59699528,
          -2452.72352386, 0.0845124585232, 0.194002565677
        ],
        [6.71507232839e-06, 188, 0.153634655985, -2439.60142794,
          -2453.03908807, 0.0845084426087, 0.14150105477
        ],
        [0.00185150659104, 186, 0.126961751032, -2439.79211949,
          -2452.9731366, 0.0857557881116, 0.151147872282
        ],
        [5.00000250015e-07, 155, 0.126958615969, -2439.79214418,
          -2452.9886613, 0.085757424582, 0.148819466958
        ],
        [0.00505501137817, 156, 0.123602087313, -2439.81893792,
          -2452.91914913, 0.0855661126697, 0.159532252731
        ],
        [0.00786341242103, 185, 0.123405255013, -2439.82053166,
          -2453.95034699, 0.0855585997597, 0.0568859424683
        ],
        [0.00118659843806, 413, 0.0224239504648, -2441.52587575,
          -2454.91610462, 0.0877455231252, 0.0216561747413
        ],
        [0.0103083502713, 412, 0.0199074563967, -2441.644911, -2455.1059887,
          0.0881702564483, 0.0179108475367
        ],
        [0.00206171622434, 191, 0.0198921921243, -2441.64567806,
          -2455.20015711, 0.0881736745813, 0.0163011903247
        ],
        [0.000844358630831, 190, 0.0153113156039, -2441.90741322,
          -2455.53694904, 0.0892306414078, 0.0116399855708
        ],
        [0.000832059380366, 189, 0.0134605911017, -2442.03623912,
          -2455.73572215, 0.0898318941733, 0.0095417136448
        ],
        [0.00344180112597, 153, 0.0120658215663, -2442.14562856,
          -2455.87881764, 0.0903124732451, 0.0082695293944
        ],
        [5.00000250015e-07, 152, 0.0110076612065, -2442.23741385,
          -2455.93101864, 0.0903641757246, 0.00784892519239
        ],
        [5.00000250015e-07, 144, 0.0110075178031, -2442.23742688,
          -2455.93101611, 0.0903641102783, 0.00784894502231
        ],
        [5.00000250015e-07, 151, 0.011007517803, -2442.23742688,
          -2455.93101611, 0.0903641017044, 0.00784894502231
        ],
        [5.00000250015e-07, 142, 0.0110073252352, -2442.23744437,
          -2455.93101901, 0.0903640394139, 0.00784892228185
        ],
        [5.00000250015e-07, 143, 0.0110073252352, -2442.23744437,
          -2455.93101901, 0.0903640394139, 0.00784892228185
        ],
        [5.00000250015e-07, 150, 0.0110073252352, -2442.23744437,
          -2455.93101901, 0.0903640543872, 0.00784892228184
        ],
        [5.00000250015e-07, 145, 0.0110073252352, -2442.23744437,
          -2455.93101901, 0.0903640579347, 0.00784892228184
        ],
        [5.00000250015e-07, 149, 0.0110071326695, -2442.23746187,
          -2455.93102191, 0.0903639963921, 0.0078488995366
        ]
      ], "nm": [["Macro_ac77e2e288ff59630dd0e0e238dcdd8f", 1]]
    },
    {"p":
      [
        [5.24269775263e-06, 32, 1, -2712.40508709, -2714.59716136,
          0.00343613941431, 1
        ]
      ], "nm": [["Macro_c1d410ac2d4326e60776b2ad6fbebbd3", 1]]
    },
    {"p":
      [
        [0.00517930962519, 138, 0.0746641480879, -2417.97257036,
          -2421.61817748, 0.0206686316135, 0.0323106662763
        ],
        [0.000832059380366, 189, 0.0746146791059, -2417.97323313,
          -2420.79735959, 0.0206733502726, 0.0734213884407
        ],
        [6.64849315615e-06, 190, 0.0744150924557, -2417.97591161,
          -2421.12825903, 0.0206646302549, 0.0527369237901
        ],
        [5.00000250015e-07, 147, 0.053945002868, -2418.29760533,
          -2420.93207475, 0.0209095401652, 0.0641677103342
        ],
        [5.00000250015e-07, 148, 0.053945002868, -2418.29760533,
          -2420.93207475, 0.0209095401652, 0.0641677103342
        ],
        [5.00000250015e-07, 149, 0.0539446757596, -2418.29761139,
          -2420.932103, 0.0209096678171, 0.0641658977182
        ],
        [5.00000250015e-07, 146, 0.0539446757596, -2418.29761139,
          -2420.932103, 0.0209096678225, 0.0641658977182
        ],
        [5.00000250015e-07, 142, 0.0539443485927, -2418.29761746,
          -2420.93213125, 0.0209097955312, 0.0641640849552
        ],
        [5.00000250015e-07, 143, 0.0539443485927, -2418.29761746,
          -2420.93213125, 0.0209097955312, 0.0641640849552
        ],
        [5.00000250015e-07, 145, 0.0539443485927, -2418.29761746,
          -2420.93213125, 0.0209097955376, 0.0641640849552
        ],
        [5.00000250015e-07, 150, 0.0539443485927, -2418.29761746,
          -2420.93213125, 0.0209097955376, 0.0641640849552
        ],
        [5.00000250015e-07, 144, 0.0539440213664, -2418.29762352,
          -2420.93215951, 0.0209099232678, 0.0641622720439
        ],
        [5.00000250015e-07, 151, 0.0539440213664, -2418.29762352,
          -2420.93215951, 0.0209099232678, 0.0641622720439
        ],
        [5.00000250015e-07, 152, 0.0539433842871, -2418.29763533,
          -2420.9321937, 0.0209100528126, 0.0641600783891
        ],
        [6.73542294711e-06, 153, 0.0539402707117, -2418.29769305,
          -2420.98817823, 0.0209109663941, 0.0606668032965
        ],
        [0.000849786910324, 141, 0.0535504173162, -2418.3049468,
          -2421.58504883, 0.0209116405215, 0.0333990031663
        ],
        [0.000852814185706, 188, 0.0517633228832, -2418.33888854,
          -2421.93249488, 0.0214082948802, 0.0235960658751
        ],
        [5.00000250015e-07, 405, 0.00788800848881, -2420.2202267,
          -2423.29843006, 0.0234240702824, 0.00602034655015
        ],
        [5.00000250015e-07, 404, 0.00788800848881, -2420.2202267,
          -2423.29843006, 0.0234240702835, 0.00602034655015
        ],
        [5.00000250015e-07, 286, 0.00788787381574, -2420.22024377,
          -2423.2984415, 0.0234240322597, 0.00602027765244
        ]
      ], "nm":
      [["Macro_7aa3de09315649cbd212487875c25d0b", 1],
        ["Macro_3f3b34504c749abc6060fc75188cf165", 1]
      ]
    },
    {"p":
      [
        [6.68830687792e-06, 289, 0.0677864566145, -2449.50172253,
          -2552.30780365, 1.72966004924, 0.0199582155488
        ],
        [9.91266137123e-06, 120, 0.0675723560664, -2449.50488599,
          -2550.31834648, 1.73193037482, 0.145925766043
        ],
        [0.0455946135313, 20, 0.0675721838896, -2449.50488854,
          -2551.43358216, 1.73194260595, 0.0478400116362
        ],
        [0.00574023465404, 119, 0.0675576149065, -2449.50510417,
          -2552.57680216, 1.73195693719, 0.0152509585452
        ],
        [5.00000250015e-07, 473, 0.0650519996214, -2449.54289801,
          -2550.52667953, 1.74201251414, 0.118482466507
        ],
        [5.00000250015e-07, 474, 0.0650519661522, -2449.54289852,
          -2550.52669127, 1.74201287231, 0.118481074797
        ],
        [0.0386938204586, 472, 0.0650438619468, -2449.54302311,
          -2550.00016338, 1.74202934454, 0.200593633019
        ],
        [0.0112527765423, 451, 0.0550571877664, -2449.70971253,
          -2552.89618851, 1.74570021531, 0.0110812668236
        ],
        [0.0178881580688, 23, 0.0492700396623, -2449.82076877,
          -2554.27862674, 1.76429242536, 0.00278102002374
        ],
        [0.00697999908357, 118, 0.0492687419858, -2449.82079511,
          -2553.98613105, 1.76428883925, 0.00372591873616
        ],
        [0.0611136525841, 117, 0.0476154872901, -2449.85492688,
          -2553.61661065, 1.76681819567, 0.00539155513073
        ],
        [5.00000250015e-07, 430, 0.038863651969, -2450.05802554,
          -2552.44872804, 1.77778442566, 0.0173348074931
        ],
        [5.00000250015e-07, 431, 0.038863651969, -2450.05802554,
          -2552.44872804, 1.77778442566, 0.0173348074931
        ],
        [5.96033247017e-06, 432, 0.0388622580709, -2450.0580614,
          -2553.02527958, 1.77779798472, 0.0097392579833
        ],
        [5.00000250015e-07, 16, 0.0384004502161, -2450.07001577,
          -2550.76108064, 1.76681367921, 0.0937248985592
        ],
        [5.00000250015e-07, 17, 0.0384004502161, -2450.07001577,
          -2550.76108064, 1.76681367921, 0.0937248985592
        ],
        [7.06200047794e-06, 18, 0.0383999008265, -2450.07003008,
          -2551.34046452, 1.766805297, 0.0525087592472
        ],
        [0.0153756781844, 19, 0.0372970670156, -2450.09917026,
          -2552.69993347, 1.77428474597, 0.0134840977273
        ],
        [7.300871959e-06, 2, 0.0325183983019, -2450.23627892, -2553.38279745,
          1.77865360914, 0.00681173642127
        ],
        [5.00000250015e-07, 376, 0.0315462755132, -2450.26662942,
          -2553.53931132, 1.78583352994, 0.00582484970577
        ]
      ], "nm": [["Macro_2ea0d533f1c821d0ff95ff1a8fd0fbaf", 1]]
    },
    {"p":
      [
        [0.00238755305195, 309, 0.0719389786767, -3265.57024483,
          -3479.37715618, 1.99999275208, 0.0143651167542
        ],
        [0.00329660848033, 136, 0.0602456124742, -3265.74763332,
          -3478.82926954, 1.99999275208, 0.0248458184102
        ],
        [0.00084080910594, 133, 0.0602455547716, -3265.74763428,
          -3478.79439041, 1.99999275208, 0.0257277093787
        ],
        [8.79237650965e-06, 137, 0.0601461698928, -3265.74928531,
          -3479.61747389, 1.99999275208, 0.0112964115674
        ],
        [0.000988385952395, 132, 0.0598507677196, -3265.75420881,
          -3478.63002764, 1.99999275208, 0.0303237539785
        ],
        [0.00685940121241, 127, 0.0598496333902, -3265.75422776,
          -3479.2255053, 1.99999275208, 0.0167174603341
        ],
        [5.00000250015e-07, 128, 0.0594717534391, -3265.7605616,
          -3478.48610937, 1.99999275208, 0.0350175595406
        ],
        [5.00000250015e-07, 131, 0.0594717534391, -3265.7605616,
          -3478.48610937, 1.99999275208, 0.0350175595406
        ],
        [5.00000250015e-07, 129, 0.0594712879606, -3265.76056943,
          -3478.48613503, 1.99999275208, 0.0350166609658
        ],
        [5.00000250015e-07, 130, 0.0594712879606, -3265.76056943,
          -3478.48613503, 1.99999275208, 0.0350166609658
        ],
        [5.00000250015e-07, 134, 0.058712765404, -3265.7734059,
          -3478.87196563, 1.99999275208, 0.0238073265789
        ],
        [5.00000250015e-07, 135, 0.058712765404, -3265.7734059,
          -3478.87196563, 1.99999275208, 0.0238073265789
        ],
        [5.00000250015e-07, 125, 0.055760960515, -3265.82498908,
          -3479.87363497, 1.99999275208, 0.00874361771814
        ],
        [5.00000250015e-07, 126, 0.055760960515, -3265.82498908,
          -3479.87363497, 1.99999275208, 0.00874361771814
        ],
        [5.00000250015e-07, 121, 0.0557605252726, -3265.82499688,
          -3479.87366039, 1.99999275208, 0.00874339544848
        ],
        [5.00000250015e-07, 474, 0.0237105440053, -3266.68014323,
          -3479.33820775, 1.99999275208, 0.0149356542255
        ],
        [5.00000250015e-07, 473, 0.0237105026224, -3266.68014497,
          -3479.33818123, 1.99999275208, 0.0149360502847
        ],
        [0.0386938204586, 472, 0.0237091325746, -3266.68020276,
          -3476.86801217, 1.99999275208, 0.176610515615
        ],
        [5.00000250015e-07, 5, 0.0169995235577, -3267.01287775,
          -3476.6118946, 1.99999275208, 0.228163940659
        ],
        [5.00000250015e-07, 4, 0.0169995204047, -3267.01287794,
          -3476.61189502, 1.99999275208, 0.228163843737
        ]
      ], "nm": [["Macro_be23845973410ae17f8665fb7e636a97", 1]]
    },
    {"p":
      [
        [0.00517930962519, 138, 0.0783742431721, -2555.92335959,
          -2557.34235043, 6.11351501465e-06, 0.034143549235
        ],
        [6.64849315615e-06, 190, 0.0782601351061, -2555.92481659,
          -2556.83969121, 6.11351501465e-06, 0.0564430910552
        ],
        [0.000832059380366, 189, 0.0781123103466, -2555.92670726,
          -2556.62588806, 6.11351501465e-06, 0.0698979301232
        ],
        [5.00000250015e-07, 147, 0.0557740267866, -2556.26354664,
          -2556.68495351, 6.11351501465e-06, 0.0658889393231
        ],
        [5.00000250015e-07, 148, 0.0557740267866, -2556.26354664,
          -2556.68495351, 6.11351501465e-06, 0.0658889393231
        ],
        [5.00000250015e-07, 149, 0.0557690197375, -2556.26363642,
          -2556.68502309, 6.11351501465e-06, 0.0658843547632
        ],
        [5.00000250015e-07, 146, 0.0557690197375, -2556.26363642,
          -2556.68502309, 6.11351501465e-06, 0.0658843547632
        ],
        [5.00000250015e-07, 142, 0.0557640124214, -2556.26372621,
          -2556.68509269, 6.11351501465e-06, 0.0658797699393
        ],
        [5.00000250015e-07, 143, 0.0557640124214, -2556.26372621,
          -2556.68509269, 6.11351501465e-06, 0.0658797699393
        ],
        [5.00000250015e-07, 145, 0.0557640124214, -2556.26372621,
          -2556.68509269, 6.11351501465e-06, 0.0658797699393
        ],
        [5.00000250015e-07, 150, 0.0557640124214, -2556.26372621,
          -2556.68509269, 6.11351501465e-06, 0.0658797699393
        ],
        [5.00000250015e-07, 144, 0.0557590048372, -2556.26381601,
          -2556.68516229, 6.11351501465e-06, 0.0658751848501
        ],
        [5.00000250015e-07, 151, 0.0557590048372, -2556.26381601,
          -2556.68516229, 6.11351501465e-06, 0.0658751848501
        ],
        [5.00000250015e-07, 152, 0.0557536549981, -2556.26391196,
          -2556.68523799, 6.11351501465e-06, 0.0658701981758
        ],
        [6.73542294711e-06, 153, 0.0557163968824, -2556.26458045,
          -2556.8240877, 6.11351501465e-06, 0.0573307081673
        ],
        [0.000849786910324, 141, 0.0553483669438, -2556.27120778,
          -2557.35224936, 6.11351501465e-06, 0.0338072316753
        ],
        [0.000852814185706, 188, 0.0362267978307, -2556.69505581,
          -2557.97046705, 7.16208277024e-06, 0.0182188551053
        ],
        [5.00000250015e-07, 405, 0.00151598381948, -2559.86879032,
          -2560.27181756, 0.00444438736426, 0.00182413615674
        ],
        [5.00000250015e-07, 404, 0.00151598381948, -2559.86879032,
          -2560.27181756, 0.00444438748, 0.00182413615675
        ],
        [5.00000250015e-07, 286, 0.00151597467307, -2559.86879635,
          -2560.27182285, 0.00444436877735, 0.00182412651949
        ]
      ], "nm": [["Macro_ee8a9a7e0c74e0394a3d5d9419eeac7c", 1]]
    }
  ], "metadata":
  {"invocation":
    "pplacer -o Macrostomorpha18S_retry.jplace -p --keep-at-most 20 -c Macrostomorpha18S.refpkg Macrostomorpha18S_All.fasta"
  }, "version": 3, "fields":
  ["distal_length", "edge_num", "like_weight_ratio", "likelihood",
    "marginal_like", "pendant_length", "post_prob"
  ]
}
